# Supplementary material
Source: Royal Society of Chemistry journal article supplement (doi:10.1039/d6ob00554c)
Supplement: d6ob00554c1.pdf [file d6ob00554c1.pdf]

**SUPPORTING INFORMATION**

***Intramolecular difunctionalization of alkynes involving cascade radical 1,4-heteroaryl migrations and formal total synthesis of a  $\beta$ -imidazolyl- $\gamma$ -lactam alkaloid: isoanantine***

*Yu-Tong Huang, Che-Chien Chang\**

*Department of Chemistry, Fu Jen Catholic University.; 510, Zhongzheng Rd.,  
Xinzhuang Dist., New Taipei City, 24205 Taiwan.*

*E-mail: 080686@mail.fju.edu.tw*

This supplementary material includes:

1.  $^1\text{H}$ ,  $^{13}\text{C}\{^1\text{H}\}$ -DEPT NMR, HRMS spectra of compound **1a–1i**, **2a–2i**, **3a–3h**, **4**, **5**.....s-27.
2. X-ray crystal structure information of compound **3a** (Deposition Number 2501597).....s-108.

## General procedure A (Preparation of amides)

To a solution of heteroaryl acid **1a–1i** (1.0 equiv), coupling reagent (1.5–2 equiv), and DMAP (0.5 equiv) in CH<sub>2</sub>Cl<sub>2</sub> (1–20 mL) was added dropwise propargyl amine (1.1 equiv). The reaction mixture was stirred at room temperature for 16–20 h. The resulting mixture was diluted with DCM, washed with saturated NaHCO<sub>3</sub> (aq) and brine. The organic layer was dried over Na<sub>2</sub>SO<sub>4</sub>, filtered, and concentrated to give a crude product, which was purified by column chromatography (EtOAc/ hexanes = 3/7 ~ pure EtOAc or MeOH/ CH<sub>2</sub>Cl<sub>2</sub> = 1/22) to give the desired product **2a–2i**.

### 1-Methyl-*N*-(prop-2-yn-1-yl)-1H-imidazole-5-carboxamide (**1a**)

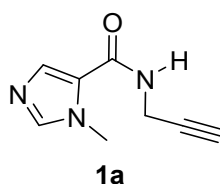

1-Methyl-1H-imidazole-5-carboxylic acid (882.8 mg, 7.0 mmol), EDC (1.5 equiv), DMAP (0.5 equiv), propargyl amine (1.1 equiv) in DMF (7mL) were treated according to method A (with the reaction time of 20 h, and the eluent is MeOH/ CH<sub>2</sub>Cl<sub>2</sub> = 1/22) to give **1a** (843.6 mg, 74%), as a white solid.

mp 110.8–112.3 °C; IR (neat) 3282 (NH), 3230, 3281, 3113, 3111, 3038, 1655 (C=O), 1557, 1520, 1496, 1468, 1467, 1419, 1413, 1382, 1360, 1307, 1261, 1235, 1161, 1134, 1048, 989, 931, 837, 834, 800, 761 cm<sup>-1</sup>; <sup>1</sup>H NMR (300 MHz, CDCl<sub>3</sub>) δ 7.60 (br s, 1H, amide N-H), 7.55 (s, 1H), 7.50 (s, 1H), 4.14 (dd, *J* = 5.4, 2.4 Hz, 2H), 3.90 (s, 3H, NCH<sub>3</sub>), 2.22 (t, *J* = 2.3 Hz, 1H, C≡C-H); <sup>13</sup>C NMR (75 MHz, CDCl<sub>3</sub>) δ 160.2 (C), 141.7 (CH), 132.1 (CH), 125.9 (C), 79.7 (C, C≡C-H), 71.4 (CH, C≡C-H), 34.1 (CH<sub>3</sub>), 28.7

(CH<sub>2</sub>); HRMS (ESI<sup>+</sup>): m/z calcd. for C<sub>8</sub>H<sub>9</sub>N<sub>3</sub>O [M+H]<sup>+</sup>: 164.0824. Found: 164.0825.

### 1-Methyl-*N*-(prop-2-yn-1-yl)-1H-imidazole-4-carboxamide (**1b**)

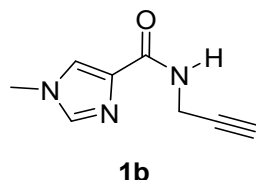

1-Methyl-1H-imidazole-4-carboxylic acid (504.4 mg, 4.0 mmol), EDC (2 equiv), HOBT (0.1 equiv), propargyl amine (1.1 equiv) in DMF (10 mL) were treated according to method A (with the reaction time of 18 h, and the eluent is EtOAc + 0.1% Et<sub>3</sub>N) to give **1b** (480.4 mg, 74%), as a white solid.

mp 155.7–157.1 °C; IR (neat) 3381 (NH), 3213, 3149, 3121, 2951, 2114, 1641 (C=O), 1572, 1529, 1493, 1435, 1413, 1361, 1341, 1306, 1251, 1233, 1149, 1052, 955, 922, 845, 796, 774, 749, 706 cm<sup>-1</sup>; <sup>1</sup>H NMR (300 MHz, CDCl<sub>3</sub>) δ 7.51 (d, *J* = 1.5 Hz, 1H), 7.35 (d, *J* = 0.9 Hz, 1H), 7.31-7.21 (br s, 1H, amide N-H), 4.18 (dd, *J* = 5.7, 2.7 Hz, 2H), 3.71 (s, 3H), 2.21 (t, *J* = 2.3 Hz, 1H, C≡C-H); <sup>13</sup>C NMR (75 MHz, CDCl<sub>3</sub>) δ 162.1 (C), 137.4 (CH), 137.0 (C), 123.2 (CH), 79.7 (C, C≡C-H), 71.3 (CH, C≡C-H), 33.8 (CH<sub>3</sub>), 28.6 (CH<sub>2</sub>); HRMS (ESI<sup>+</sup>): m/z calcd. for C<sub>8</sub>H<sub>9</sub>N<sub>3</sub>O [M+H]<sup>+</sup>: 164.0824. Found: 164.0820.

### 1-Methyl-*N*-(prop-2-yn-1-yl)-1H-imidazole-2-carboxamide (**1c**)

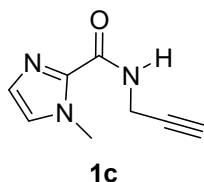

1-Methyl-1H-imidazole-2-carboxylic acid (126.1 mg, 1.0 mmol), DIC (2 equiv), HOBT (0.1 equiv), propargyl amine (1.1 equiv) in DMF (4 mL) were treated according to method A (with the reaction time of 16 h, and the eluent is EtOAc/ hexanes = 1/1 + 0.1% Et<sub>3</sub>N) to give **1c** (56.5 mg, 35%), as a white solid.

mp 137.4–141.4 °C; IR (neat) 3341 (NH), 3282, 3115, 2974, 1668 (C=O), 1543, 1506, 1476, 1422, 1354, 1292, 1277, 1153, 1091, 993, 926, 915, 789 cm<sup>-1</sup>; <sup>1</sup>H NMR (300 MHz, CDCl<sub>3</sub>) δ 7.78 (br s, 1H, amide N-H), 7.00 (d, *J* = 0.6 Hz, 1H), 6.95 (s, 1H), 4.14 (dd, *J* = 5.7, 2.7 Hz, 2H), 4.03 (s, 3H), 2.22 (t, *J* = 2.6 Hz, 1H, C≡C-H); <sup>13</sup>C NMR (75 MHz, CDCl<sub>3</sub>) δ 158.9 (C), 138.6 (C), 127.8 (CH), 125.6 (CH), 79.3 (C, C≡C-H), 71.5 (CH, C≡C-H), 35.6 (CH<sub>3</sub>), 28.6 (CH<sub>2</sub>); HRMS (ESI<sup>+</sup>): *m/z* calcd. for C<sub>8</sub>H<sub>9</sub>N<sub>3</sub>O [M+H]<sup>+</sup>: 164.0824. Found: 164.0820.

### ***N*-(Prop-2-yn-1-yl)picolinamide (1d)**

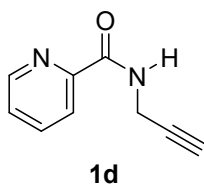

Picolinic acid (246.2 mg, 2.0 mmol), EDC (1.5 equiv), DMAP (0.1 equiv), propargyl amine (1.1 equiv) in THF (20 mL) were treated according to method A (with the reaction time of 18 h, and the eluent is EtOAc/ hexanes = 3/7) to give **1d** (169.3 mg, 53%), as a white solid.

mp 78.5–79.8 °C; IR (neat) 3393 (NH), 3341, 3302, 30578, 2968, 2917, 2115, 1668

(C=O), 1589, 1570, 1519, 1465, 1434, 1352, 1289, 1265, 1239, 1163, 1115, 1088, 1051, 1002, 918, 819, 738  $\text{cm}^{-1}$ ;  $^1\text{H}$  NMR (300 MHz,  $\text{CDCl}_3$ )  $\delta$  8.50 (d,  $J = 4.8$  Hz, 1H), 8.24 (br s, 1H, amide N-H), 8.14 (d,  $J = 7.8$  Hz, 1H), 7.79 (td,  $J = 7.8, 1.5$  Hz, 1H), 7.38 (ddd,  $J = 7.5, 4.8, 0.9$  Hz, 1H), 4.22 (dd,  $J = 5.7, 2.7$  Hz, 2H), 2.24 (t,  $J = 2.6$  Hz, 1H,  $\text{C}\equiv\text{C}-\underline{\text{H}}$ );  $^{13}\text{C}$  NMR (75 MHz,  $\text{CDCl}_3$ )  $\delta$  164.0 (C), 149.4 (C), 148.2 (CH), 137.4 (CH), 126.4 (CH), 122.3 (CH), 79.4 (C,  $\underline{\text{C}}\equiv\text{C}-\text{H}$ ), 71.6 (CH,  $\text{C}\equiv\text{C}-\underline{\text{H}}$ ), 29.1 ( $\text{CH}_2$ ); HRMS (ESI<sup>+</sup>):  $m/z$  calcd. for  $\text{C}_9\text{H}_8\text{N}_2\text{O}$   $[\text{M}+\text{H}]^+$ : 161.0715. Found: 161.0714.

### ***N*-(Prop-2-yn-1-yl)isonicotinamide (1e)**

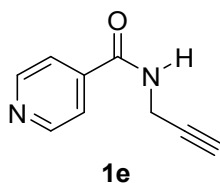

Isonicotinic acid (123.11 mg, 1.0 mmol), EDC (2 equiv), DMAP (0.5 equiv), propargyl amine (1.1 equiv) in DCM (5 mL) were treated according to method A (with the reaction time of 18 h, and the eluent is EtOAc/ hexanes = 75/25) to give **1e** (125.11 mg, 78%), as a white solid.

mp 142.0–145.1 °C; IR (neat) 3325 (NH), 1648 (C=O), 1556, 1538, 1488, 1417, 1359, 1311, 1261, 1091, 991, 923, 848, 753  $\text{cm}^{-1}$ ;  $^1\text{H}$  NMR (300 MHz,  $\text{CDCl}_3$ )  $\delta$  8.77 (dd,  $J = 4.5, 1.5$  Hz, 2H), 7.64 (dd,  $J = 4.5, 1.5$  Hz, 2H), 6.51 (br s, 1H, amide N-H), 4.27 (dd,  $J = 5.3, 2.6$  Hz, 2H), 2.32 (t,  $J = 2.4$  Hz, 1H,  $\text{C}\equiv\text{C}-\underline{\text{H}}$ );  $^{13}\text{C}$  NMR (75 MHz,  $\text{CDCl}_3$ )  $\delta$  165.2 (C), 150.6 ( $\text{CH}\times 2$ ), 140.9 (C), 121.0 ( $\text{CH}\times 2$ ), 78.8 (C,  $\underline{\text{C}}\equiv\text{C}-\text{H}$ ), 72.4 (CH,  $\text{C}\equiv\text{C}-\underline{\text{H}}$ ), 29.9 ( $\text{CH}_2$ ); HRMS (ESI<sup>+</sup>):  $m/z$  calcd. for  $\text{C}_9\text{H}_8\text{N}_2\text{O}$   $[\text{M}+\text{H}]^+$ : 161.0715. Found: 161.0712.

## ***N*-(Prop-2-yn-1-yl)quinoline-3-carboxamide (1g)**

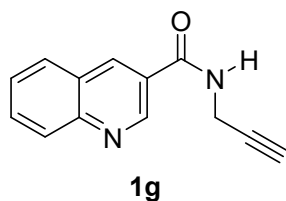

3-Quinoline carboxylic acid (519.5 mg, 3.0 mmol), EDC (1.5 equiv), DMAP (0.5 equiv), propargyl amine (1.1 equiv) in DCM (12 mL) were treated according to method A (with the reaction time of 18 h, and the eluent is EtOAc/ hexanes = 6/4, 75/25 and 9/1) to give **1g** (563.8 mg, 89%), as a white solid.

mp 120.2–123.5 °C; IR (neat) 3467 (NH), 3307, 3228, 3055, 2929, 2556, 2406, 2114, 1985, 1675 (C=O), 1636, 1619, 1601, 1547, 1504, 1473, 1431, 1410, 1383, 1343, 1304, 1261, 1230, 1207, 1154, 1129, 1045, 1019, 1009, 969, 932, 875, 866, 790, 766, 753, 726, 713  $\text{cm}^{-1}$ ;  $^1\text{H}$  NMR (300 MHz,  $\text{CDCl}_3$ )  $\delta$  9.30 (s, 1H), 8.64 (s, 1H), 8.17 (d,  $J = 8.4$  Hz, 1H), 7.92 (d,  $J = 8.1$  Hz, 1H), 7.82 (t,  $J = 7.7$  Hz, 1H), 7.63 (t,  $J = 7.2$  Hz, 1H), 6.68 (br s, 1H, amide N-H), 4.34 (dd,  $J = 5.1, 2.7$  Hz, 2H), 2.33 (t,  $J = 2.6$  Hz, 1H,  $\text{C}\equiv\text{C}-\text{H}$ );  $^{13}\text{C}$  NMR (75 MHz,  $\text{CD}_3\text{OD}$ )  $\delta$  166.1 (C), 148.4 (C), 148.3 (CH), 136.4 (CH), 131.6 (CH), 129.0 (CH), 127.6 (CH), 127.0 (C), 126.7 (C), 79.1 (C,  $\text{C}\equiv\text{C}-\text{H}$ ), 71.0 (CH,  $\text{C}\equiv\text{C}-\text{H}$ ), 28.7 ( $\text{CH}_2$ ); HRMS (ESI<sup>+</sup>):  $m/z$  calcd. for  $\text{C}_{13}\text{H}_{11}\text{N}_2\text{O}$   $[\text{M}+\text{H}]^+$ : 211.0871. Found: 211.0874.

## **1-Methyl-*N*-(prop-2-yn-1-yl)-1H-pyrrole-2-carboxamide (1h)**

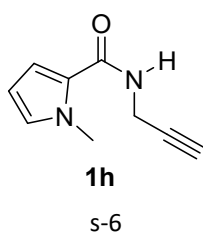

1-Methyl-1H-pyrrole-2-carboxylic acid (250.3 mg, 2.0 mmol), EDC (1.5 equiv), DMAP (0.5 equiv), propargyl amine (1.1 equiv) were treated according to method A (with the reaction time of 17 h, and the eluent is EtOAc/ hexanes = 35/65) to give **1h** (286.5 mg, 88%), as a white solid.

mp 120.8–123.9 °C; IR (neat) 3255 (NH), 3113, 2939, 1635 (C=O), 1543, 1516, 1480, 1464, 1441, 1411, 1387, 1350, 1326, 1272, 1261, 1158, 1095, 1070, 980, 913, 876, 819, 793, 760, 746, 730  $\text{cm}^{-1}$ ;  $^1\text{H}$  NMR (300 MHz,  $\text{CDCl}_3$ )  $\delta$  6.72 (t,  $J = 1.8$  Hz, 1H), 6.58 (dd,  $J = 4.1, 1.7$  Hz, 1H), 6.20-6.06 (br s, amide N-H overlapped with one dd at 6.07,  $J = 4.1, 2.6$  Hz, 2H), 4.15 (t,  $J = 2.1$  Hz, 2H), 3.93 (s, 3H), 2.24 (t,  $J = 2.6$  Hz, 1H, C $\equiv$ C-H);  $^{13}\text{C}$  NMR (75 MHz,  $\text{CDCl}_3$ )  $\delta$  161.5 (C), 128.3 (CH), 125.0 (C), 112.1 (CH), 107.3 (CH), 79.9 (C, C $\equiv$ C-H), 71.4 (CH, C $\equiv$ C-H), 36.8 ( $\text{CH}_3$ ), 28.9 ( $\text{CH}_2$ ); HRMS (ESI $^+$ ): m/z calcd. for  $\text{C}_9\text{H}_{10}\text{N}_2\text{O}$  [M+H] $^+$ : 163.0871. Found: 163.0866.

### 1-Methyl-N-(prop-2-yn-1-yl)-1H-pyrrole-3-carboxamide (**1i**)

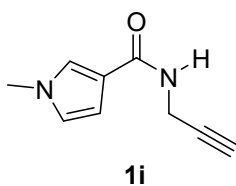

1-Methyl-1H-pyrrole-3-carboxylic acid (125.1 mg, 1.0 mmol), EDC (1.5 equiv), DMAP (0.5 equiv), propargyl amine (1.1 equiv) in DCM (5 mL) were treated according to method A (with the reaction time of 16 h, and the eluent is EtOAc/ hexanes = 7/3) to give **1i** (139.7 mg, 86%), as a white solid.

mp 107.9–109.5 °C; IR (neat) 3287 (NH), 2929, 1626 (C=O), 1557, 1523, 1507, 1420, 1390, 1341, 1270, 1238, 1152, 1070, 1011, 942, 912, 854, 815, 790, 761, 720  $\text{cm}^{-1}$ ;  $^1\text{H}$

NMR (300 MHz, CDCl<sub>3</sub>)  $\delta$  7.19 (d,  $J$  = 1.5 Hz, 1H), 6.55 (t,  $J$  = 2.6 Hz, 1H), 6.37 (dd,  $J$  = 2.6, 2.0 Hz, 1H), 6.07 (br s, 1H), 4.18 (dd,  $J$  = 5.3, 2.6 Hz, 2H), 3.65 (d,  $J$  = 1.8 Hz, 3H), 2.23 (t,  $J$  = 2.6 Hz, 1H, C $\equiv$ C-H); <sup>13</sup>C NMR (75 MHz, CDCl<sub>3</sub>)  $\delta$  164.3 (C), 124.9 (CH), 122.7(CH), 119.1 (C), 107.2 (CH), 80.3 (C, C $\equiv$ C-H), 71.3 (CH, C $\equiv$ C-H), 36.5 (CH<sub>3</sub>), 29.0 (CH<sub>2</sub>); HRMS (ESI<sup>+</sup>):  $m/z$  calcd. for C<sub>9</sub>H<sub>10</sub>N<sub>2</sub>O [M+H]<sup>+</sup>: 163.0871. Found: 163.0872.

### General procedure B (Preparation of radical precursors)

To a solution of amide **1a–1i** (1 equiv) and DMAP (0.2 equiv) in CH<sub>2</sub>Cl<sub>2</sub> (1–20 mL) was added Et<sub>3</sub>N (1.5–2 equiv) and (Boc)<sub>2</sub>O (1.5–2 equiv). The reaction mixture was stirred at room temperature for 16–18 h. The resulting mixture was diluted with DCM, washed with saturated NaHCO<sub>3</sub>(aq) and brine. The organic layer was dried over Na<sub>2</sub>SO<sub>4</sub>, filtered, and concentrated to give a crude product, which was purified by column chromatography (EtOAc/ hexanes = 15/85–9/1) to give the desired product **2a–2i**.

### *tert*-Butyl (1-methyl-1H-imidazole-5-carbonyl)(prop-2-yn-1-yl)carbamate (**2a**)

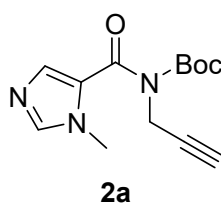

Compound **1a** (0.78 g, 4.77 mmol), DMAP (0.2 equiv), (Boc)<sub>2</sub>O (1.5 equiv), and Et<sub>3</sub>N (1.5 equiv) were treated according to method B (with the reaction time of 18 h, and the eluent is EtOAc/ hexanes = 8/2) to give **2a** (1.05 g, 84%), as a white solid.

mp 175.8–177.1 °C; IR (neat) 3282, 3120, 2981, 2123, 1733 (C=O), 1674 (C=O), 1537, 1492, 1477, 1420, 1394, 1370, 1355, 1351, 1334, 1273, 1242, 1240, 1223, 1148, 976,

942, 922, 898, 849, 798, 766, 751  $\text{cm}^{-1}$ ;  $^1\text{H}$  NMR (300 MHz,  $\text{CDCl}_3$ )  $\delta$  8.81 (br s, 1H), 7.50 (s, 1H), 4.47 (d,  $J = 2.1$  Hz, 2H), 4.01 (s, 3H), 2.27 (t,  $J = 2.4$  Hz, 1H), 1.45 (s, 9H);  $^{13}\text{C}$  NMR (75 MHz,  $\text{CDCl}_3$ )  $\delta$  162.9 (C), 152.5 (C), 141.8 (CH), 136.3 (CH), 127.6 (C), 83.9 (C), 78.9 (C,  $\text{C}\equiv\text{C-H}$ ), 71.2 (C,  $\text{C}\equiv\text{C-H}$ ), 35.0 ( $\text{CH}_2$ ), 33.5 ( $\text{CH}_3$ ), 27.7 ( $\text{CH}_3 \times 3$ ); HRMS ( $\text{ESI}^+$ ):  $m/z$  calcd. for  $\text{C}_{13}\text{H}_{17}\text{N}_3\text{O}_3$   $[\text{M}+\text{H}]^+$ : 264.1348. Found 264.1352.

***tert*-Butyl (1-methyl-1H-imidazole-4-carbonyl)(prop-2-yn-1-yl) carbamate (2b)**

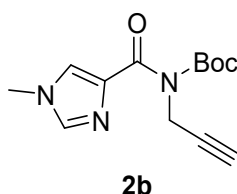

Compound **1b** (0.78 g, 4.77 mmol), DMAP (0.2 equiv),  $(\text{Boc})_2\text{O}$  (1.5 equiv), and  $\text{Et}_3\text{N}$  (1.5 equiv) were treated according to method B (with the reaction time of 17 h, and the eluent is  $\text{EtOAc}/\text{hexanes} = 8/2$ ) to give **2b** (269.5 g, 83%), as a white solid.

mp 124.2–127.1  $^\circ\text{C}$ ; IR (neat) 3444, 3265, 2981, 2124, 1726 ( $\text{C}=\text{O}$ ), 1652 ( $\text{C}=\text{O}$ ), 1548, 1476, 1458, 1425, 1395, 1370, 1334, 1290, 1259, 1216, 1152, 1050, 1020, 941, 896, 850, 798, 767  $\text{cm}^{-1}$ ;  $^1\text{H}$  NMR (300 MHz,  $\text{CDCl}_3$ )  $\delta$  7.45 (d,  $J = 1.2$  Hz, 1H), 7.354 (s, 1H), 4.45 (d,  $J = 2.4$  Hz, 2H), 3.69 (s, 3H), 2.17 (t,  $J = 2.7$  Hz, 1H,  $\text{C}\equiv\text{C-H}$ ), 1.37 (s, 9H);  $^{13}\text{C}$  NMR (75 MHz,  $\text{CDCl}_3$ )  $\delta$  166.5 (C), 152.7 (C), 138.2 (C), 137.2 (CH), 125.0 (CH), 83.1 (C), 79.4 (CH,  $\text{C}\equiv\text{C-H}$ ), 70.8 (C,  $\text{C}\equiv\text{C-H}$ ), 35.0 ( $\text{CH}_2$ ), 33.8 ( $\text{CH}_3$ ), 27.6 ( $\text{CH}_3 \times 3$ ); HRMS ( $\text{ESI}^+$ ):  $m/z$  calcd. for  $\text{C}_{13}\text{H}_{17}\text{N}_3\text{O}_3$   $[\text{M}+\text{Na}]^+$ : 286.1168. Found 286.1161.

***tert*-Butyl (1-methyl-1H-imidazole-2-carbonyl)(prop-2-yn-1-yl) carbamate (2c)**

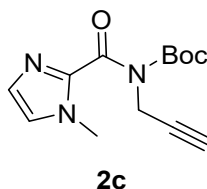

Compound **1c** (0.14 g, 0.84 mmol), DMAP (0.2 equiv), (Boc)<sub>2</sub>O (2 equiv), and Et<sub>3</sub>N (2 equiv) were treated according to method B (with the reaction time of 18 h, and the eluent is EtOAc/ hexanes = 35/65) to give **2c** (0.16 g, 72%), as a white solid.

mp 103.4–105.2 °C; IR (neat) 3279, 2979, 1736 (C=O), 1676 (C=O), 1476, 1432, 1369, 1341, 1317, 1285, 1235, 1150, 982, 942, 920, 899, 848, 770 cm<sup>-1</sup>; <sup>1</sup>H NMR (300 MHz, CDCl<sub>3</sub>) δ 7.01 (d, *J* = 0.9 Hz, 1H), 6.93 (s, 1H), 4.45 (d, *J* = 2.4 Hz, 2H), 3.81 (s, 3H), 2.20 (t, *J* = 2.4 Hz, 1H, C≡C-H), 1.26 (s, 9H); <sup>13</sup>C NMR (75 MHz, CDCl<sub>3</sub>) δ 162.9 (C), 152.1 (C), 140.9 (C), 128.4 (CH), 124.3 (CH), 83.6 (C), 78.6 (CH, C≡C-H), 71.2 (C, C≡C-H), 34.7 (CH<sub>2</sub>), 34.2 (CH<sub>3</sub>), 27.5 (CH<sub>3</sub>×3); HRMS (ESI<sup>+</sup>): *m/z* calcd. for C<sub>13</sub>H<sub>17</sub>N<sub>3</sub>O<sub>3</sub> [M+H]<sup>+</sup>: 264.1348. Found 264.1342.

### ***tert*-Butyl picolinoyl(prop-2-yn-1-yl)carbamate (2d)**

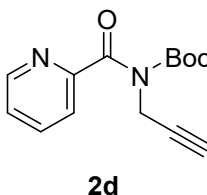

Compound **1d** (0.33 g, 2.05 mmol), DMAP (0.2 equiv), (Boc)<sub>2</sub>O (1.5 equiv), and Et<sub>3</sub>N (1.5 equiv) were treated according to method B (with the reaction time of 16 h, and the eluent is EtOAc/ hexanes = 2/8) to give **2d** (0.17 g, 90%), as a white solid.

mp 47.1–51.0 °C; IR (neat) 3278, 3057, 2982, 2936, 1746 (C=O), 1683 (C=O), 1588, 1570, 1469, 1458, 1439, 1418, 1380, 1370, 1346, 1291, 1256, 1236, 1153, 1093, 1047, 996, 984, 943, 907, 849, 818, 775, 749, 727 cm<sup>-1</sup>; <sup>1</sup>H NMR (300 MHz, CDCl<sub>3</sub>) δ 8.54 (d, *J* = 4.8 Hz, 1H), 7.78 (td, *J* = 7.5, 1.5 Hz, 1H), 7.66 (d, *J* = 7.8 Hz, 1H), 7.37 (ddd,

$J = 7.5, 4.8, 1.1$  Hz, 1H), 4.56 (d,  $J = 2.4$  Hz, 2H), 2.22 (t,  $J = 2.4$  Hz, 1H,  $\text{C}\equiv\text{C}-\underline{\text{H}}$ ), 1.18 (s, 9H);  $^{13}\text{C}$  NMR (75 MHz,  $\text{CDCl}_3$ )  $\delta$  170.7 (C), 154.1 (C), 152.0 (C), 148.3 (CH), 136.9 (CH), 125.4 (CH), 122.9 (CH), 83.8 (C,  $\text{O}-\underline{\text{C}}(\text{CH}_3)_3$ ), 78.7 (C,  $\underline{\text{C}}\equiv\text{C}-\text{H}$ ), 71.1 (CH,  $\text{C}\equiv\text{C}-\underline{\text{H}}$ ), 34.7 ( $\text{CH}_2$ ), 27.4 ( $\text{CH}_3\times 3$ ); HRMS (ESI<sup>+</sup>):  $m/z$  calcd. for  $\text{C}_{14}\text{H}_{15}\text{N}_2\text{O}_3$   $[\text{M}+\text{Na}]^+$ : 283.1059. Found 283.1052.

### ***tert*-Butyl isonicotinoyl(prop-2-yn-1-yl)carbamate (2e)**

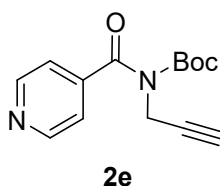

Compound **1e** (0.13 g, 0.78 mmol), DMAP (0.2 equiv),  $(\text{Boc})_2\text{O}$  (1.5 equiv), and  $\text{Et}_3\text{N}$  (1.5 equiv) were treated according to method B (with the reaction time of 16 h, and the eluent is  $\text{EtOAc}/\text{hexanes} = 35/65$ ) to give **2e** (0.18 g, 89%), as a white solid.

mp 106.8–109.7°C; IR (neat) 3411, 3200, 2984, 2937, 2118, 1739 (C=O), 1681 (C=O), 1600, 1558, 1494, 1475, 1456, 1412, 1395, 1380, 1370, 1340, 1322, 1238, 1212, 1149, 1090, 1066, 982, 964, 946, 906, 845, 808, 769, 750, 727  $\text{cm}^{-1}$ ;  $^1\text{H}$  NMR (300 MHz,  $\text{CDCl}_3$ )  $\delta$  8.64 (dd,  $J = 4.8, 1.4$  Hz, 2H), 7.30 (dd,  $J = 4.5, 1.8$  Hz, 2H), 4.50 (d,  $J = 2.4$  Hz, 2H), 2.22 (t,  $J = 2.4$  Hz, 1H), 1.17 (s, 9H);  $^{13}\text{C}$  NMR (75 MHz,  $\text{CDCl}_3$ )  $\delta$  170.2 (C), 151.4 (C), 149.9 ( $\text{CH}\times 2$ ), 144.7 (C), 120.8 ( $\text{CH}\times 2$ ), 84.9 (C), 78.5 (C,  $\underline{\text{C}}\equiv\text{C}-\text{H}$ ), 71.4 (C,  $\text{C}\equiv\text{C}-\underline{\text{H}}$ ), 34.5 ( $\text{CH}_2$ ), 27.4 ( $\text{CH}_3\times 3$ ); HRMS (ESI<sup>+</sup>):  $m/z$  calcd. for  $\text{C}_{14}\text{H}_{16}\text{N}_2\text{O}_3$   $[\text{M}+\text{H}]^+$ : 261.1239. Found 261.1234.

### ***tert*-Butylprop-2-yn-1-yl(pyrimidine-2-carbonyl)carbamate (2f)**

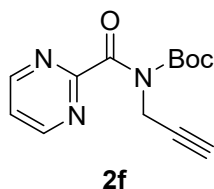

Pyrimidine-2-carboxylic acid (744.6 mg, 6.0 mmol), DIC (2 equiv), HOBt (2 equiv), propargyl amine (1.1 equiv) in DMF (20 mL) were treated according to method A (with the reaction time of 17 h, and the eluent is MeOH/ CH<sub>2</sub>Cl<sub>2</sub> = 1/20 + 0.1 %NEt<sub>3</sub>) to give **1f** ( 532.5 mg, 55%, crude), as a white solid, which was directly used for the next step without further purification.

Compound **1f** (0.33 g, 2.05 mmol), DMAP (0.2 equiv), (Boc)<sub>2</sub>O (1.5 equiv), and Et<sub>3</sub>N (1.5 equiv) were treated according to method B (with the reaction time of 18 h, and the eluent is EtOAc/ hexanes = 4/6) to give **2f** (0.14 g, 25%), as a white solid.

mp 79.8–81.3°C; IR (neat) 3280, 2983, 1744 (C=O), 1693 (C=O), 1565, 1478, 1440, 1419, 1371, 1349, 1275, 1252, 1190, 1153, 1004, 985, 945, 908, 834, 811, 749, 709 cm<sup>-1</sup>; <sup>1</sup>H NMR (300 MHz, CDCl<sub>3</sub>) δ 8.79 (d, *J* = 4.8 Hz, 2H), 7.36 (t, *J* = 5.0 Hz 1H), 4.62 (d, *J* = 2.4 Hz, 2H), 2.24 (t, *J* = 2.6 Hz, 1H, C≡C–H), 1.26 (s, 9H); <sup>13</sup>C NMR (75 MHz, CDCl<sub>3</sub>) δ 167.1 (C), 162.5 (C), 157.1 (CH×2), 151.2 (C), 121.3 (CH), 84.5 (C, O–C(CH<sub>3</sub>)<sub>3</sub>), 78.3 (C, C≡C–H), 71.3 (CH, C≡C–H), 33.7 (CH<sub>2</sub>), 27.6 (CH<sub>3</sub>×3); HRMS (ESI<sup>+</sup>): *m/z* calcd. for C<sub>13</sub>H<sub>15</sub>N<sub>3</sub>O<sub>3</sub> [M+H]<sup>+</sup>: 262.1192. Found 262.1187.

### ***tert*-Butyl prop-2-yn-1-yl(quinoline-3-carbonyl)carbamate (2g)**

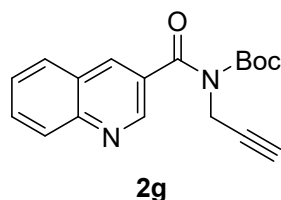

Compound **1g** (0.25 g, 1.2 mmol), DMAP (0.2 equiv), (Boc)<sub>2</sub>O (1.5 equiv), and Et<sub>3</sub>N (1.75 equiv) were treated according to method B (with the reaction time of 17 h, and

the eluent is EtOAc/ hexanes = 35/65) to give **2g** (0.35 g, 94%), as a white solid. mp 120.2–123.5 °C; IR (neat) 3290, 2980, 1737 (C=O), 1678 (C=O), 1620, 1601, 1571, 1497, 1460, 1421, 1370, 1322, 1261, 1225, 1199, 1149, 1023, 946, 847, 789, 763 cm<sup>-1</sup>; <sup>1</sup>H NMR (300 MHz, CDCl<sub>3</sub>) δ 8.96 (d, *J* = 2.1 Hz, 1H), 8.38 (d, *J* = 1.8 Hz, 1H), 8.12 (d, *J* = 8.4 Hz, 1H), 7.86 (d, *J* = 8.1 Hz, 1H), 7.77 (t, *J* = 7.7 Hz, 1H), 7.58 (t, *J* = 7.5 Hz, 1H), 4.61 (d, *J* = 2.4 Hz, 2H), 2.27 (t, *J* = 2.4 Hz, 1H, C≡C–H), 1.19 (s, 9H); <sup>13</sup>C NMR (75 MHz, CDCl<sub>3</sub>) δ 170.1 (C), 152.0 (C), 148.5 (C), 148.3 (CH), 136.1 (CH), 131.4 (C), 130.0 (C), 129.3 (CH), 128.6 (CH), 127.6 (CH), 126.8 (C), 84.7 (C, O–C(CH<sub>3</sub>)<sub>3</sub>), 78.8 (C, C≡C–H), 71.3 (CH, C≡C–H), 35.0 (CH<sub>2</sub>), 27.5 (CH<sub>3</sub>×3); HRMS (ESI<sup>+</sup>): *m/z* calcd. for C<sub>18</sub>H<sub>18</sub>N<sub>2</sub>O<sub>3</sub> [M+H]<sup>+</sup>: 311.1396. Found 311.1396.

### ***tert*-Butyl(1-methyl-1H-pyrrole-2-carbonyl)(prop-2-yn-1-yl)carbamate (2h)**

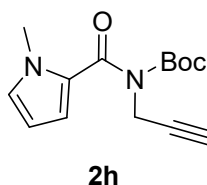

Compound **1h** (0.27 g, 1.67 mmol), DMAP (0.2 equiv), (Boc)<sub>2</sub>O (1.5 equiv), and Et<sub>3</sub>N (1.6 equiv) were treated according to method B (with the reaction time of 18 h, and the eluent is EtOAc/ hexanes = 15/85) to give **2h** (0.22 g, 85%), as a colorless liquid. IR (neat) 3287, 2929, 1626 (C=O), 1557, 1523, 1507, 1420, 1390, 1341, 1271, 1238, 1152, 1070, 1011, 942, 911, 854, 815, 790, 761, 720 cm<sup>-1</sup>; <sup>1</sup>H NMR (300 MHz, CDCl<sub>3</sub>) δ 6.75 (d, *J* = 1.5 Hz, 1H), 6.57 (dd, *J* = 3.9, 1.8 Hz, 1H), 6.05 (dd, *J* = 2.6, 1.4 Hz, 1H), 4.37 (d, *J* = 2.1 Hz, 2H), 3.80 (s, 3H), 2.20 (t, *J* = 2.4 Hz, 1H), 1.30 (s, 9H); <sup>13</sup>C NMR (75 MHz, CDCl<sub>3</sub>) δ 164.2 (C), 153.1 (C), 129.4 (CH), 127.6 (C), 117.8 (CH), 107.9 (CH), 82.7 (C), 79.3 (C, C≡C–H), 71.0 (C, C≡C–H), 36.0 (CH<sub>3</sub>), 35.0 (CH<sub>2</sub>), 27.7 (CH<sub>3</sub> ×3); HRMS (ESI<sup>+</sup>): *m/z* calcd. for C<sub>14</sub>H<sub>18</sub>N<sub>2</sub>O<sub>3</sub> [M+Na]<sup>+</sup>: 285.1215. Found 285.1212.

***tert*-Butyl(1-methyl-1H-pyrrole-3-carbonyl)(prop-2-yn-1-yl) carbamate (2i)**

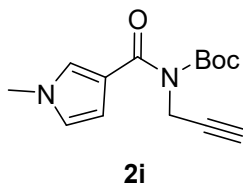

Compound **1i** (0.11 g, 0.69 mmol), DMAP (0.2 equiv), (Boc)<sub>2</sub>O (1.5 equiv), and Et<sub>3</sub>N (1.5 equiv) were treated according to method B (with the reaction time of 18 h, and the eluent is EtOAc/ hexanes = 25/75) to give **2i** (0.15 g, 85%), as a colorless liquid.

IR (neat) 3284, 2979, 1721 (C=O), 1666 (C=O), 1535, 1478, 1423, 1394, 1369, 1347, 1330, 1304, 1259, 1241, 1207, 1149, 1080, 1015, 939, 887, 852, 763, 750 cm<sup>-1</sup>; <sup>1</sup>H NMR (300 MHz, CDCl<sub>3</sub>) δ 7.16 (s, 1H), 6.49 (t, *J* = 2.6 Hz, 1H), 6.36 (dd, *J* = 2.4, 1.7 Hz, 1H), 4.41 (d, *J* = 2.4 Hz, 2H), 3.63 (s, 3H), 2.17 (t, *J* = 2.3 Hz, 1H), 1.41 (s, 9H); <sup>13</sup>C NMR (75 MHz, CDCl<sub>3</sub>) δ 167.6 (C), 153.1 (C), 127.4 (CH), 122.1 (CH), 120.3 (C), 110.6 (CH), 82.8 (C), 79.9 (C, C≡C-H), 70.5 (C, C≡C-H), 36.6 (CH<sub>3</sub>), 35.2 (CH<sub>2</sub>), 27.8 (CH<sub>3</sub>×3); HRMS (ESI<sup>+</sup>): *m/z* calcd. for C<sub>14</sub>H<sub>18</sub>N<sub>2</sub>O<sub>3</sub> [M+Na]<sup>+</sup>: 285.1215. Found 285.1219.

**General procedure C (Synthesis of  $\gamma$ -lactams using Bu<sub>3</sub>SnH)**

To a refluxed solution of compound **2a–2h** (1.0 equiv) in toluene (10 mL) at 110 °C (an oil bath) was dropwise added a solution of AIBN (0.6 equiv) and Bu<sub>3</sub>SnH (0.6–1.5 equiv) in toluene (6–10 mL) over 2–6 h via a syringe pump. The reaction solution was stirred at the same temperature for another 2–18 h. The reaction mixture was concentrated to give a crude product, which was purified by flash chromatography (10 wt % KF in silica gel) to give the desired compound **3a–3h**.

**General procedure D (Synthesis of  $\gamma$ -lactams using TTMSS)**

To a refluxed solution of compound **2a**, **2h** (1.0 equiv) in toluene (10 mL) at 110 °C (an oil bath) was dropwise added a solution of AIBN (0.6 equiv) and TTMSS (1.0–1.5 equiv) in toluene (6–10 mL) over 2–6 h via a syringe pump. The reaction solution was stirred at the same temperature for another 2–18 h. The reaction mixture was concentrated to give a crude product, which was purified by flash chromatography to give the desired compound **3a**, **3h**.

***tert*-Butyl 4-(1-methyl-1H-imidazol-5-yl)-2-oxo-2,5-dihydro-1H-pyrrole-1-carboxylate (**3a**)**

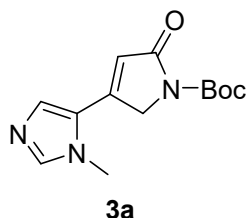

Bu<sub>3</sub>SnH as the reagent

Compound **2a** (96.40 mg, 0.37 mmol), AIBN (0.5 equiv) and Bu<sub>3</sub>SnH (0.6 equiv) was treated according to method C (with the reaction time of 4 h, and the eluent MeOH/EtOAc = 1/7 was used) to give **3a** (69.80 mg, 72%), as a white solid.

TTMSS as the reagent

Compound **2a** (0.07 g, 0.25 mmol), AIBN (0.6 equiv) and TTMSS (1.1 equiv) was treated according to method D (with the reaction time of 4 h, and the eluent MeOH/EtOAc = 1/7 was used) to give **3a** (0.03 g, 46%), as a white solid.

mp 172.7–176.3 °C; IR (neat) 3111, 2979, 2981, 1767 (C=O), 1724 (C=O), 1627, 1561, 1534, 1452, 1394, 1359, 1308, 1285, 1262, 1235, 1157, 1134, 1095, 1079, 928, 838, 761, 749 cm<sup>-1</sup>; <sup>1</sup>H NMR (300 MHz, CDCl<sub>3</sub>) δ 7.60 (s, 1H), 7.41 (s, 1H), 6.14 (s, 1H, C=C–H), 4.65 (d, *J* = 1.2 Hz, 2H, NCH<sub>2</sub>), 3.81 (s, 3H, NCH<sub>3</sub>), 1.58 (s, 9H); <sup>13</sup>C NMR

(75 MHz, CDCl<sub>3</sub>)  $\delta$  169.0 (C), 149.4 (C), 144.1 (C), 142.9 (CH), 133.1 (CH), 125.1 (C), 116.0 (CH), 83.3 (C), 51.3 (CH<sub>2</sub>), 34.1 (CH<sub>3</sub>), 28.1 (CH<sub>3</sub>×3); HRMS (ESI<sup>+</sup>):  $m/z$  calcd. for C<sub>13</sub>H<sub>17</sub>N<sub>3</sub>O<sub>3</sub> [M+H]<sup>+</sup>: 264.1348. Found 264.1354.

***tert*-Butyl-4-(1-methyl-1H-imidazol-4-yl)-2-oxo-2,5-dihydro-1H-pyrrole-1-carboxylate (3b)**

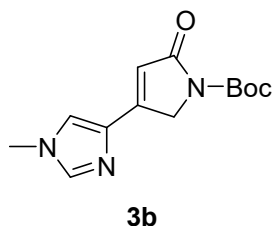

Compound **2b** (52.86 mg, 0.20 mmol), AIBN (0.5 equiv) and Bu<sub>3</sub>SnH (0.8 equiv) was treated according to method C (with the reaction time of 1 h, and the eluent MeOH/EtOAc = 1/7 + 0.1 % NEt<sub>3</sub> was used) to give **3b** (16 mg, 30%, crude), as a white solid.

mp 137.0–140.9 °C; IR (neat) 3351, 1761 (C=O), 1723 (C=O), 1667, 1637, 1544, 1434, 1371, 1344, 1299, 1258, 1163, 1082, 834, 772 cm<sup>-1</sup>; <sup>1</sup>H NMR (300 MHz, CDCl<sub>3</sub>)  $\delta$  7.52 (s, 1H), 7.28 (s, 1H), 6.22 (s, 1H, C=C–H), 4.64 (d,  $J$  = 0.9 Hz, 2H, NCH<sub>2</sub>), 3.74 (s, 3H), 1.54 (s, 9H); <sup>13</sup>C NMR (75 MHz, CDCl<sub>3</sub>)  $\delta$  170.1 (C), 150.8 (C), 149.7 (C), 139.2 (CH), 135.1 (C), 120.8 (CH), 116.8 (CH), 82.6 (C), 50.9 (CH<sub>2</sub>), 33.8 (CH<sub>3</sub>), 28.2 (CH<sub>3</sub>×3); HRMS (ESI<sup>+</sup>):  $m/z$  calcd. for C<sub>13</sub>H<sub>17</sub>N<sub>3</sub>O<sub>3</sub> [M+H]<sup>+</sup>: 264.1348. Found 264.1353.

***tert*-Butyl 4-(1-methyl-1H-imidazol-2-yl)-2-oxo-2,5-dihydro-1H-pyrrole-1-carboxylate (3c)**

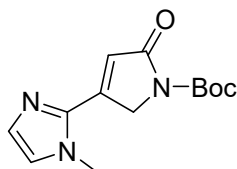

**3c**

Compound **2c** (0.05 g, 0.20 mmol), AIBN (0.5 equiv) and  $\text{Bu}_3\text{SnH}$  (0.6 equiv) was treated according to method C (with the reaction time of 2 h, and the eluent is EtOAc for chromatography was used) to give **3c** (0.02 g, 37%), as a white solid.

mp 169.1–174.6 °C; IR (neat) 3276, 3116, 2979, 2934, 1767 (C=O), 1735 (C=O), 1677, 1626, 1538, 1536, 1476, 1464, 1460, 1421, 1394, 1368, 1357, 1316, 1285, 1260, 1223, 1150, 1083, 1082, 1057, 976, 942, 924, 898, 848, 737, 707  $\text{cm}^{-1}$ ;  $^1\text{H}$  NMR (300 MHz,  $\text{CDCl}_3$ )  $\delta$  7.17 (s, 1H), 7.07 (s, 1H), 6.25 (s, 1H, C=C-H), 4.82 (s, 2H,  $\text{NCH}_2$ ), 3.84 (s, 3H), 1.54 (s, 9H);  $^{13}\text{C}$  NMR (75 MHz,  $\text{CDCl}_3$ )  $\delta$  169.5 (C), 149.1 (C), 145.3 (C), 139.6 (C), 130.0 (CH), 125.9 (CH), 119.2 (CH), 83.1 (C), 52.2 ( $\text{CH}_2$ ), 35.4 ( $\text{CH}_3$ ), 28.1 ( $\text{CH}_3 \times 3$ ); HRMS (ESI<sup>+</sup>):  $m/z$  calcd. for  $\text{C}_{13}\text{H}_{17}\text{N}_3\text{O}_3$   $[\text{M}+\text{H}]^+$ : 264.1348. Found 264.1348.

#### ***tert*-Butyl-2-oxo-4-(pyridin-2-yl)-2,5-dihydro-1H-pyrrole-1-carboxylate (**3d**)**

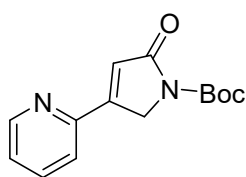

**3d**

Compound **2d** (57.20 mg, 0.20 mmol), AIBN (0.5 equiv) and  $\text{Bu}_3\text{SnH}$  (1.25 equiv) was treated according to method C (with the reaction time of 6h, and the eluent EtOAc/Hexanes = 55/45 was used) to give **3d** (15.60 mg, 27%), as a yellow solid.

mp 97.4–99.0 °C; IR (neat) 2980, 2933, 2932, 1771 (C=O), 1729 (C=O), 1625, 1587, 1568, 1468, 1440, 1394, 1369, 1340, 1258, 1157, 1087, 992, 877, 874, 850, 786, 749

cm<sup>-1</sup>; <sup>1</sup>H NMR (300 MHz, CDCl<sub>3</sub>) δ 8.67 (dd, *J* = 4.8, 0.6 Hz, 1H), 7.79 (td, *J* = 7.8, 1.8 Hz, 1H), 7.67 (d, *J* = 7.8 Hz, 1H), 7.34 (ddd, *J* = 7.2, 4.5, 1.1 Hz, 1H), 6.61 (s, 1H, C=C-H), 4.82 (d, *J* = 1.5 Hz, 2H), 1.58 (s, 9H); <sup>13</sup>C NMR (75 MHz, CDCl<sub>3</sub>) δ 169.4 (C), 156.4 (C), 150.1 (CH), 149.5 (C), 136.8 (CH), 125.0 (CH), 122.6 (CH), 121.9 (CH), 83.0 (C, O-C(CH<sub>3</sub>)<sub>3</sub>), 77.2 (C), 51.2 (CH<sub>2</sub>), 28.2 (CH<sub>3</sub>×3); HRMS (ESI<sup>+</sup>): *m/z* calcd. for C<sub>14</sub>H<sub>16</sub>N<sub>2</sub>O<sub>3</sub> [M+H]<sup>+</sup>: 261.1239. Found 261.1240.

***tert*-Butyl- 2-oxo-4-(pyridin-4-yl)-2,5-dihydro-1H-pyrrole-1-carboxylate (3e)**

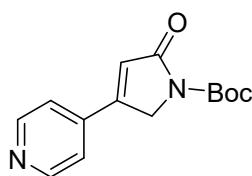

**3e**

Compound **2e** (0.05 g, 0.20 mmol), AIBN (0.6 equiv) and Bu<sub>3</sub>SnH (1.2 equiv) was treated according to method C (with the reaction time of 4h, and the eluent MeOH/CH<sub>2</sub>Cl<sub>2</sub> = 1/18 was used) to give **3e** (16.50 mg, 32%), as a white solid.

mp 158.2–161.0 °C; IR (neat) 3438, 3092, 3038, 2981, 2932, 1779 (C=O), 1727 (C=O), 1695, 1596, 1555, 1444, 1413, 1392, 1368, 1349, 1327, 1260, 1201, 1186, 1156, 1099, 1013, 889, 871, 823, 780, 768, 737 cm<sup>-1</sup>; <sup>1</sup>H NMR (300 MHz, CDCl<sub>3</sub>) δ 8.74 (br s, 2H), 7.39 (d, *J* = 5.7 Hz, 2H), 6.59 (s, 1H, C=C-H), 4.69 (d, *J* = 1.2 Hz, 2H), 1.58 (s, 9H); <sup>13</sup>C NMR (75 MHz, CDCl<sub>3</sub>) δ 168.1 (C), 153.4 (C), 151.0 (CH×2), 149.5 (C), 137.9 (C), 123.7 (CH×2), 120.0 (CH), 83.6 (C, O-C(CH<sub>3</sub>)<sub>3</sub>), 50.7 (CH<sub>2</sub>), 28.1 (CH<sub>3</sub>×3); HRMS (ESI<sup>+</sup>): *m/z* calcd. for C<sub>14</sub>H<sub>16</sub>N<sub>2</sub>O<sub>3</sub> [M+H]<sup>+</sup>: 261.1239. Found 261.1234.

***tert*-Butyl-2-oxo-4-(pyrimidin-2-yl)-2,5-dihydro-1H-pyrrole-1-carboxylate (3f)**

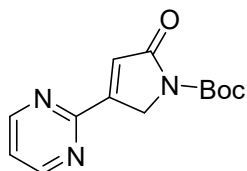

**3f**

Compound **2f** (0.05 g, 0.18 mmol), AIBN (0.5 equiv) and Bu<sub>3</sub>SnH (1.2 equiv) was treated according to method C (with the reaction time of 12h, and the eluent EtOAc/Hexanes = 6/4 was used) to give **3f** (11.50 mg, 24%), as a yellow solid.

mp 157.7–161.3 °C; IR (neat) 3444, 3122, 3075, 3002, 2977, 2927, 1770 (C=O), 1697 (C=O), 1634, 1561, 1478, 1450, 1441, 1422, 1390, 1387, 1349, 1297, 1271, 1242, 1211, 1179, 1107, 1071, 989, 890, 880, 862, 843, 758, 738 cm<sup>-1</sup>; <sup>1</sup>H NMR (300 MHz, CDCl<sub>3</sub>) δ 8.81 (d, *J* = 4.8 Hz, 2H), 7.30 (t, *J* = 5.0 Hz, 1H), 7.00 (t, *J* = 1.7 Hz, 1H, C=C–H), 4.79 (d, *J* = 1.8 Hz, 2H), 1.57 (s, 9H); <sup>13</sup>C NMR (75 MHz, CDCl<sub>3</sub>) δ 169.0 (C), 159.7 (C), 157.4 (CH), 157.0 (CH), 155.3 (C), 149.5 (C), 127.5 (CH), 121.0 (CH), 83.1 (C, O-C(CH<sub>3</sub>)<sub>3</sub>), 51.1 (CH<sub>2</sub>), 28.2 (CH<sub>3</sub>×3); HRMS (ESI<sup>+</sup>): *m/z* calcd. for C<sub>13</sub>H<sub>15</sub>N<sub>3</sub>O<sub>3</sub> [M+H]<sup>+</sup>: 262.1192. Found 262.1185.

***tert*-Butyl 2-oxo-4-(quinolin-3-yl)-2,5-dihydro-1H-pyrrole-1-carboxylate (3g)**

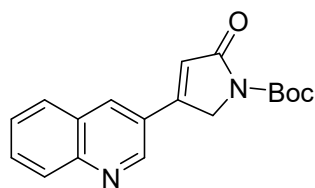

**3g**

Compound **2g** (62.05 mg, 0.20 mmol), AIBN (0.6 equiv) and Bu<sub>3</sub>SnH (1.25 equiv) was treated according to method C (with the reaction time of 4h, and the eluent EtOAc/Hexanes = 25/75, 1/1 was used) to give **3g** (7.0 mg, 11%), as a yellow solid.

mp 163.8–166.6 °C; IR (neat) 3061, 2979, 2930, 1770 (C=O), 1727 (C=O), 1622, 1571, 1541, 1496, 1476, 1456, 1393, 1357, 1316, 1258, 1159, 1094, 1079, 1025, 984, 961, 859, 811, 788, 756, 732 cm<sup>-1</sup>; <sup>1</sup>H NMR (300 MHz, CDCl<sub>3</sub>) δ 9.13 (br s, 1H), 8.28 (s,

1H), 8.18 (d,  $J = 8.4$  Hz, 1H), 7.91 (d,  $J = 8.1$  Hz, 1H), 7.83 (t,  $J = 7.5$  Hz, 1H), 7.65 (t,  $J = 7.5$  Hz, 1H), 6.66 (s, 1H, C=C-H), 4.84 (d,  $J = 0.9$  Hz, 2H), 1.61 (s, 9H);  $^{13}\text{C}$  NMR (75 MHz,  $\text{CDCl}_3$ )  $\delta$  168.6 (C), 153.0 (C), 149.6 (C), 148.9 (C), 147.7 (CH), 133.2 (CH), 131.3 (CH), 129.6 (CH), 128.5 (CH), 127.9 (CH), 127.2 (C), 124.0 (C), 121.3 (C), 83.4 (C, O-C(CH<sub>3</sub>)<sub>3</sub>), 50.9 (CH<sub>2</sub>), 28.2 (CH<sub>3</sub>×3); HRMS (ESI<sup>+</sup>):  $m/z$  calcd. for C<sub>18</sub>H<sub>18</sub>N<sub>2</sub>O<sub>3</sub> [M+H]<sup>+</sup>: 311.1395. Found 311.1393.

***tert*-Butyl 1-methyl-5'-oxo-2',5'-dihydro-1H,1'H-[2,3'-bipyrrole]-1'-carboxylate (3h)**

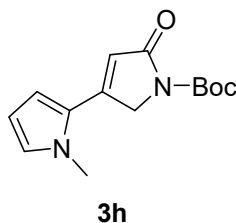

Bu<sub>3</sub>SnH as the reagent

Compound **2h** (0.05 g, 0.20 mmol), AIBN (0.6 equiv) and Bu<sub>3</sub>SnH (1.1 equiv) was treated according to method C (with the reaction time of 4h, and the eluent EtOAc/Hexanes = 1/1 was used) to give **3h** (31.9 mg, 61%), as a yellow solid.

TTMSS as the reagent

Compound **2h** (0.05 g, 0.18 mmol), AIBN (0.6 equiv) and TTMSS (1.0 equiv) was treated according to method D (with the reaction time of 4 h, and the eluent EtOAc/Hexanes = 1/1 was used) to give **3h** (2.8 mg, 6%), as a white solid.

mp 121.0–123.8 °C; IR (neat) 3108, 2934, 2979, 1765(C=O), 1723 (C=O), 1609, 1522, 1477, 1450, 1420, 1394, 1355, 1330, 1290, 1256, 1216, 1160, 1100, 1062, 1039, 981, 890, 864, 846, 833, 774, 733 cm<sup>-1</sup>;  $^1\text{H}$  NMR (300 MHz,  $\text{CDCl}_3$ )  $\delta$  6.82 (s, 1H), 6.53 (dd,  $J = 3.9, 1.5$  Hz, 1H), 6.17 (dd,  $J = 3.6, 2.7$  Hz, 1H), 5.98 (s, 1H, C=C-H), 4.60 (d,  $J = 0.9$  Hz, 2H, NCH<sub>2</sub>), 3.76 (s, 3H), 1.55 (s, 9H);  $^{13}\text{C}$  NMR (75 MHz,  $\text{CDCl}_3$ )  $\delta$  170.0

(C), 149.7 (C), 146.7 (C), 129.6 (CH), 125.2 (C), 113.8 (CH), 113.3 (CH), 109.0 (CH), 82.8 (C), 51.7 (CH<sub>2</sub>), 36.9 (CH<sub>3</sub>), 28.2 (CH<sub>3</sub>×3); HRMS (ESI<sup>+</sup>): m/z calcd. for C<sub>14</sub>H<sub>18</sub>N<sub>2</sub>O<sub>3</sub> [M+Na]<sup>+</sup>: 285.1215. Found 264.1221.

***tert*-Butyl 4-(1-methyl-1H-imidazol-5-yl)-2-oxopyrrolidine-1-carboxylate (4)**

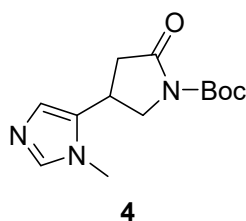

To a solution of compound **3a** (290.90 mg, 1.10 mmol) in MeOH (11 mL) was added AcOH (0.13 mL) and Pd/C (72.70 mg, 25 wt.%). The air inside of the reaction vessel was removed and replaced with H<sub>2</sub> gas. The reaction mixture was hydrogenated at room temperature under 70 psi for 2 days. After TLC analysis indicated that the starting material had been consumed completely, the reaction mixture was added K<sub>2</sub>CO<sub>3</sub>, and filtered by a pad of celite. The filtrate was concentrated to give a white solid **3a** (287.5 mg, 98%), which was directly used for the next step without further purification.

mp 114.7–118.1 °C; IR (neat) 3422, 2982, 1777, 1714 (C=O), 1642 (C=O), 1564, 1508, 1478, 1370, 1307, 1259, 1154, 1116, 1091, 1024, 924, 835, 779, 750 cm<sup>-1</sup>; <sup>1</sup>H NMR (300 MHz, CDCl<sub>3</sub>) δ 7.36 (br s, 1H), 6.80 (br s, 1H), 4.04 (dd, *J* = 10.5, 7.8 Hz, 1H), 3.64–3.58 (m, 1H), 3.53 (s, 1H), 3.52–3.38 (m, 1H), 2.80 (dd, *J* = 17.1, 8.1 Hz, 1H), 2.53 (dd, *J* = 17.0, 9.2 Hz), 1.43 (s, 9H); <sup>13</sup>C NMR (75 MHz, CDCl<sub>3</sub>) δ 171.8 (C), 150.0 (C), 139.0 (CH), 131.2 (C), 125.5 (CH), 83.3 (C), 50.9 (CH<sub>2</sub>), 38.9 (CH<sub>2</sub>), 31.6 (CH<sub>3</sub>), 28.0 (CH<sub>3</sub>×3), 26.9 (CH); HRMS (ESI<sup>+</sup>): m/z calcd. for C<sub>13</sub>H<sub>19</sub>N<sub>3</sub>O<sub>3</sub> [M+H]<sup>+</sup>: 266.1505. Found 266.1504.

**4-(1-Methyl-1H-imidazol-5-yl)pyrrolidin-2-one (5)**

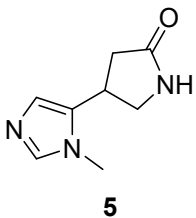

To a solution of compound **4** (0.02 g, 0.08 mmol) in THF (0.45 mL) was added to a solution of Na<sub>2</sub>CO<sub>3</sub> (0.01 g, 0.09 mmol) in H<sub>2</sub>O (0.3 mL) at room temperature for overnight (16 hrs). After TLC analysis indicated that the starting material was not consumed completely, the reaction temperature was warmed up to 50 °C for another 17 hrs. The residual of H<sub>2</sub>O was removed by azeotropic evaporation 3 times with toluene (1 mL×3). The resulting mixture was filtered and washed with CH<sub>2</sub>Cl<sub>2</sub>, then concentrated to give the crude product, which was purified by flash chromatography (with the eluent MeOH/CH<sub>2</sub>Cl<sub>2</sub> = 1/5 was used) to give **5** (6.0 mg, 48%), as a transparent liquid.

IR (neat) 3406 (NH), 2151, 1773, 1679 (C=O), 1564, 1510, 1451, 1425, 1369, 1335, 1299, 1273, 1236, 1160, 1115, 1082, 1048, 948, 905, 810 cm<sup>-1</sup>; <sup>1</sup>H NMR (300 MHz, CDCl<sub>3</sub>) δ 7.42 (s, 1H), 6.88 (s, 1H), 6.32 (br s, 1H, amide N-H), 3.79–3.71 (m, 1H), 3.68–3.56 (m, overlapped with one s at 3.59, N-CH<sub>3</sub>, 4H), 3.48–3.43 (dd, *J* = 8.1, 7.8 Hz, 1H), 2.72 (dd, *J* = 16.7, 8.6 Hz, 1H), 2.43 (dd, *J* = 13.5, 8.7 Hz, 1H); <sup>13</sup>C NMR (75 MHz, CDCl<sub>3</sub>) δ 176.5 (C), 138.7 (CH), 133.1 (C), 125.7 (CH), 47.2 (CH<sub>2</sub>), 36.4 (CH<sub>2</sub>), 31.6 (CH), 30.7 (CH<sub>3</sub>); HRMS (ESI<sup>+</sup>): *m/z* calcd. for C<sub>8</sub>H<sub>11</sub>N<sub>3</sub>O [M+H]<sup>+</sup>: 166.0980. Found 166.0980.

YTH2197-B-20241115

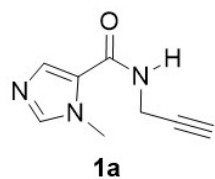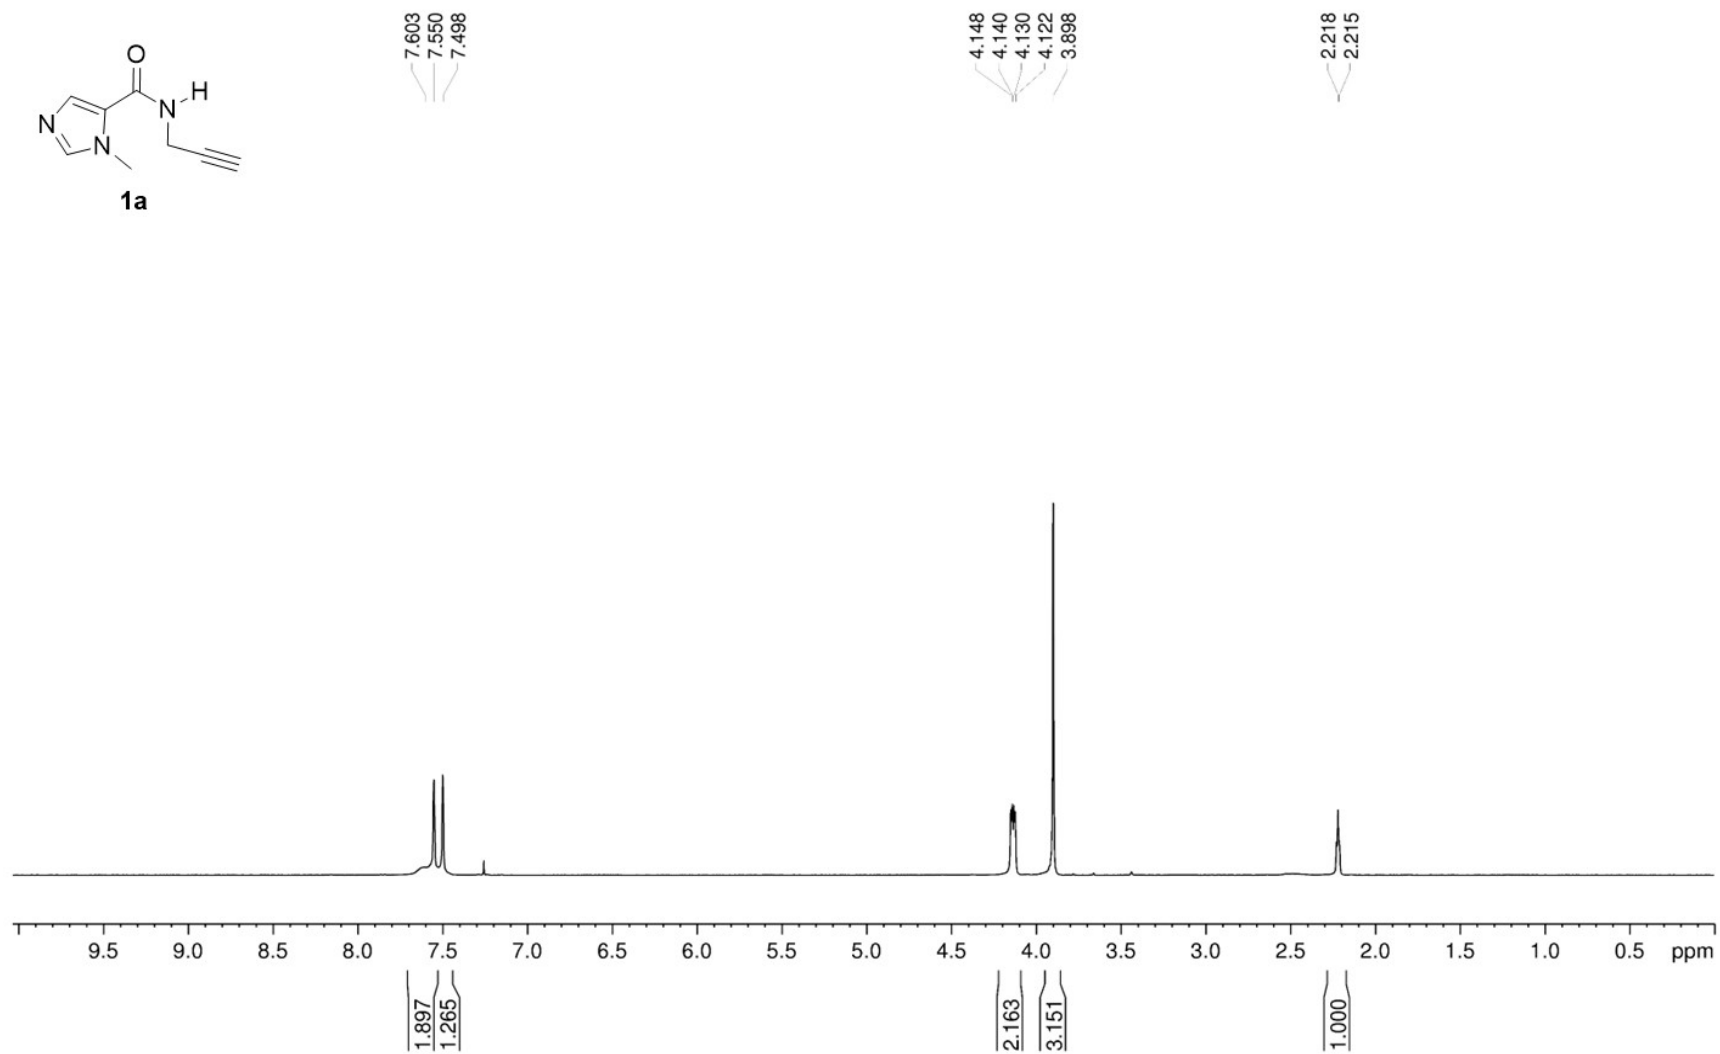

$^1\text{H}$  NMR (300 MHz,  $\text{CDCl}_3$ ) of **1a**

YTH2197-B-20241115

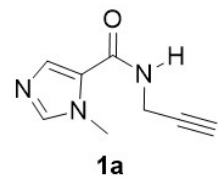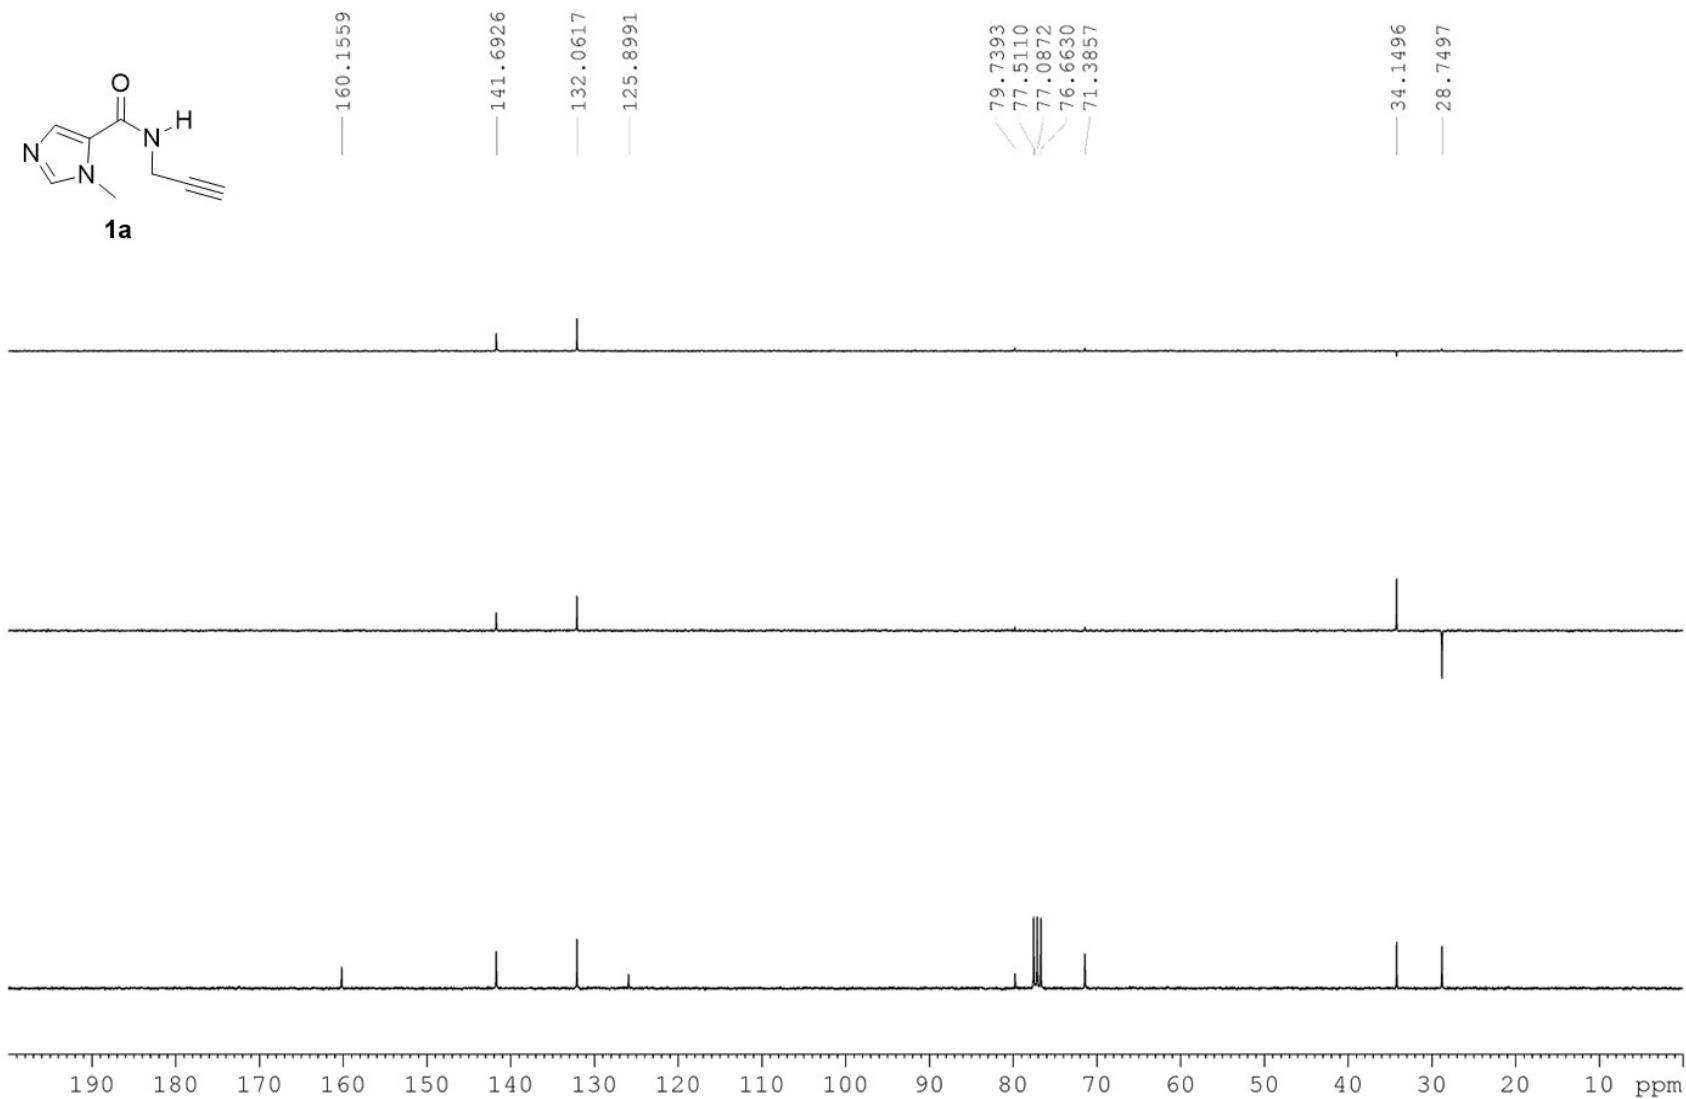

$^{13}\text{C}\{^1\text{H}\}$ -DEPT NMR (75 MHz,  $\text{CDCl}_3$ ) of **1a**

## Elemental Composition Report

### Single Mass Analysis

Tolerance = 500.0 PPM / DBE: min = -10.0, max = 100.0

Element prediction: Off

Number of isotope peaks used for i-FIT = 3

Monoisotopic Mass, Even Electron Ions

111 formula(e) evaluated with 35 results within limits (up to 25 closest results for each mass)

Elements Used:

C: 1-100 H: 1-100 N: 1-10 O: 1-20

YTH3032B

250919FJU21 33 (0.340) Cm (31:35-(18:23+55:60))

1: TOF MS ES+  
3.02e+005

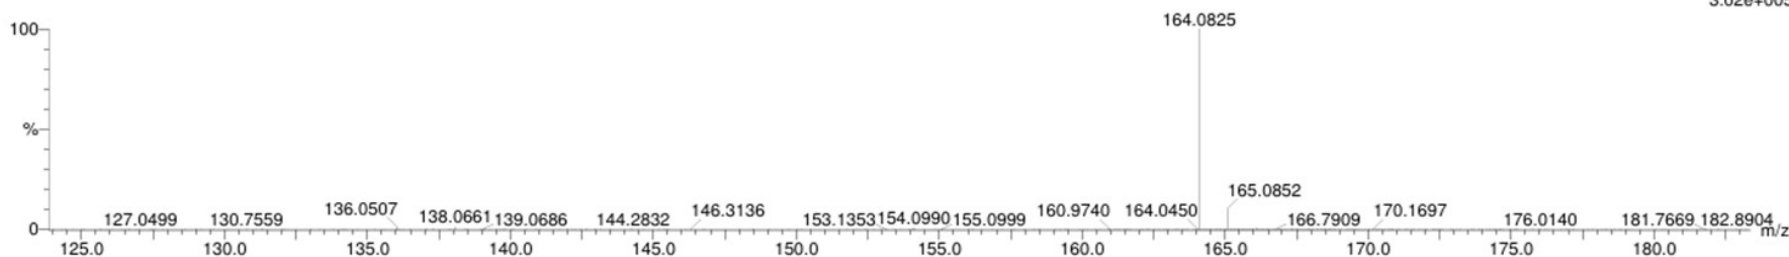

Minimum: 80.00  
Maximum: 100.00

| Mass     | RA     | Calc. Mass | mDa   | PPM    | DBE  | Formula      |
|----------|--------|------------|-------|--------|------|--------------|
| 164.0825 | 100.00 | 164.0824   | 0.1   | 0.6    | 5.5  | C8 H10 N3 O  |
|          |        | 164.0784   | 4.1   | 25.0   | 1.5  | C3 H10 N5 O3 |
|          |        | 164.0770   | 5.5   | 33.5   | -3.5 | C2 H14 N O7  |
|          |        | 164.0883   | -5.8  | -35.3  | -3.5 | C H14 N3 O6  |
|          |        | 164.0896   | -7.1  | -43.3  | 1.5  | C2 H10 N7 O2 |
|          |        | 164.0923   | -9.8  | -59.7  | 0.5  | C6 H14 N O4  |
|          |        | 164.0712   | 11.3  | 68.9   | 5.5  | C9 H10 N O2  |
|          |        | 164.0671   | 15.4  | 93.9   | 1.5  | C4 H10 N3 O4 |
|          |        | 164.1008   | -18.3 | -111.5 | 1.5  | C H10 N9 O   |
|          |        | 164.1035   | -21.0 | -128.0 | 0.5  | C5 H14 N3 O3 |
|          |        | 164.1075   | -25.0 | -152.4 | 4.5  | C10 H14 N O  |
|          |        | 164.0572   | 25.3  | 154.2  | 6.5  | C6 H6 N5 O   |
|          |        | 164.0559   | 26.6  | 162.1  | 1.5  | C5 H10 N O5  |
|          |        | 164.0532   | 29.3  | 178.6  | 2.5  | C H6 N7 O3   |
|          |        | 164.1134   | -30.9 | -188.3 | -4.5 | C3 H18 N O6  |
|          |        | 164.1147   | -32.2 | -196.2 | 0.5  | C4 H14 N5 O2 |
|          |        | 164.0460   | 36.5  | 222.4  | 6.5  | C7 H6 N3 O2  |
|          |        | 164.0420   | 40.5  | 246.8  | 2.5  | C2 H6 N5 O4  |
|          |        | 164.0406   | 41.9  | 255.4  | -2.5 | C H10 N O8   |
|          |        | 164.1246   | -42.1 | -256.6 | -4.5 | C2 H18 N3 O5 |
|          |        | 164.1260   | -43.5 | -265.1 | 0.5  | C3 H14 N7 O  |
|          |        | 164.1287   | -46.2 | -281.6 | -0.5 | C7 H18 N O3  |
|          |        | 164.0348   | 47.7  | 290.7  | 6.5  | C8 H6 N O3   |
|          |        | 164.0321   | 50.4  | 307.2  | 7.5  | C4 H2 N7 O   |
|          |        | 164.0307   | 51.8  | 315.7  | 2.5  | C3 H6 N3 O5  |

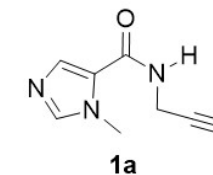

HRMS (ESI<sup>+</sup>) of **1a**

YTH2026-B-20230928(C13)

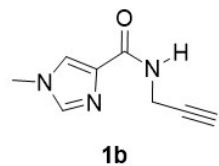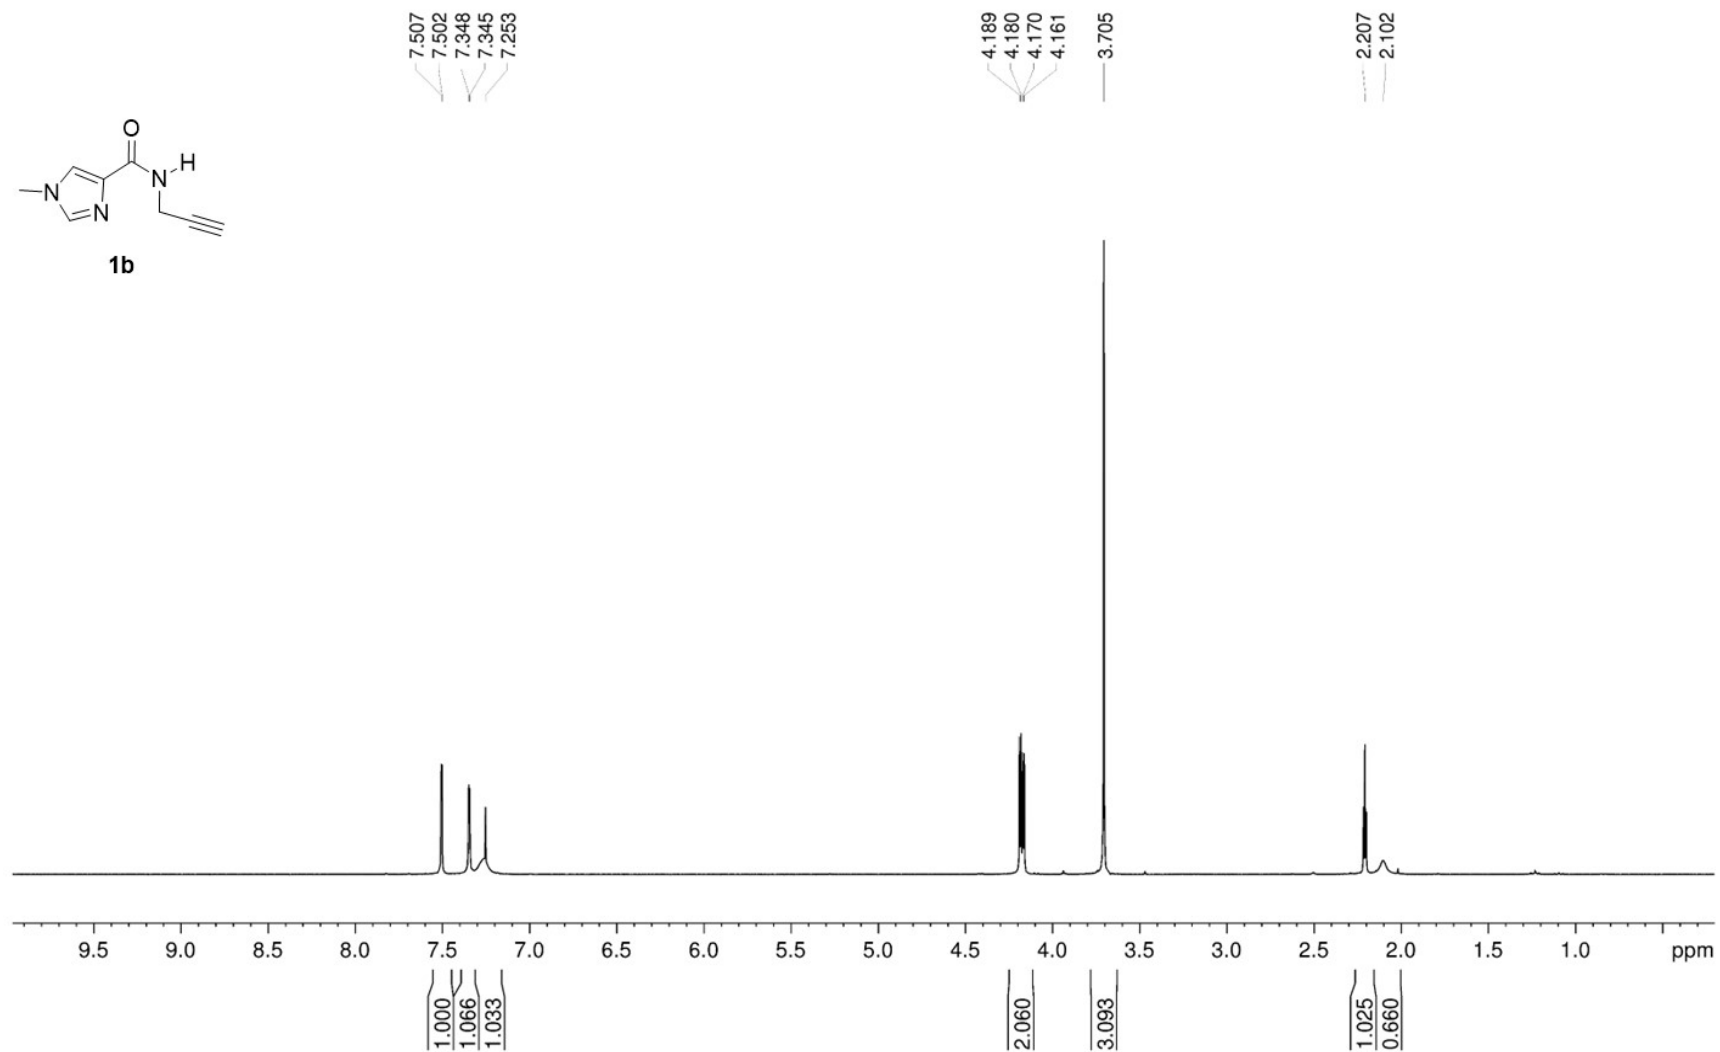

$^1\text{H}$  NMR (300 MHz,  $\text{CDCl}_3$ ) of **1b**

YTH2026-B-20230928 (C13)

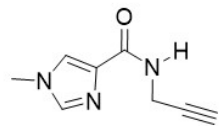

**1b**

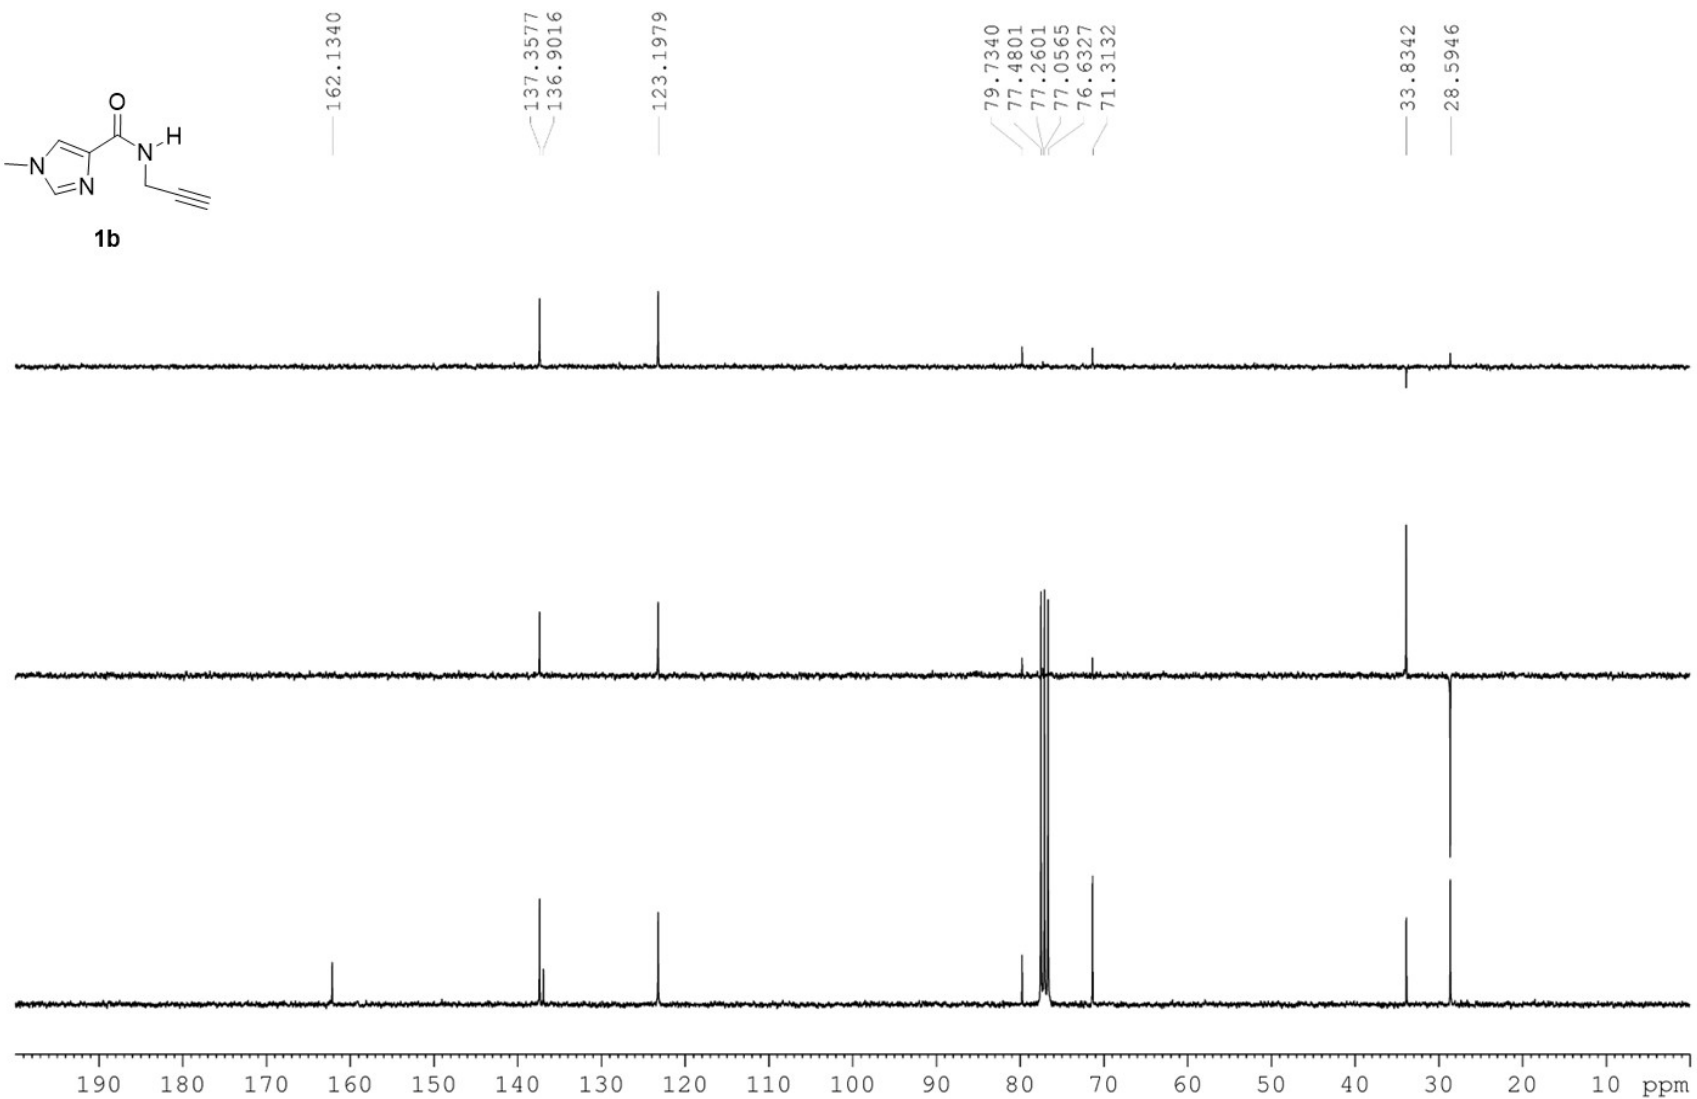

$^{13}\text{C}\{^1\text{H}\}$ -DEPT NMR (75 MHz,  $\text{CDCl}_3$ ) of **1b**

## Elemental Composition Report

### Single Mass Analysis

Tolerance = 500.0 PPM / DBE: min = -10.0, max = 100.0

Element prediction: Off

Number of isotope peaks used for i-FIT = 3

Monoisotopic Mass, Even Electron Ions

111 formula(e) evaluated with 35 results within limits (up to 25 closest results for each mass)

Elements Used:

C: 1-100 H: 1-100 N: 1-10 O: 1-10

YTH2026B

250919FJU27 37 (0.394) Cm (32:39-(15:21+59:65))

1: TOF MS ES+  
1.39e+005

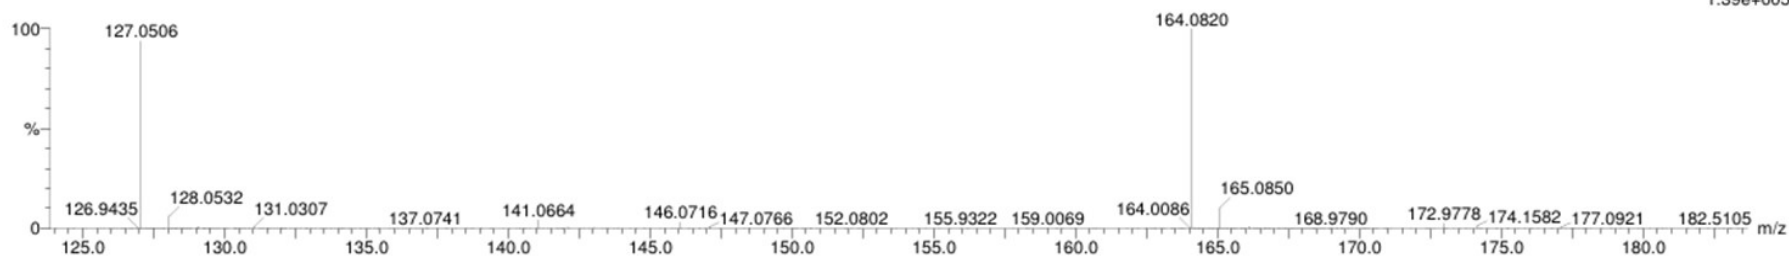

Minimum: -10.0  
Maximum: 100.0

| Mass     | Calc. Mass | mDa   | PPM    | DBE  | Formula      |
|----------|------------|-------|--------|------|--------------|
| 164.0820 | 164.0824   | -0.4  | -2.4   | 5.5  | C8 H10 N3 O  |
|          | 164.0784   | 3.6   | 21.9   | 1.5  | C3 H10 N5 O3 |
|          | 164.0770   | 5.0   | 30.5   | -3.5 | C2 H14 N O7  |
|          | 164.0883   | -6.3  | -38.4  | -3.5 | C H14 N3 O6  |
|          | 164.0896   | -7.6  | -46.3  | 1.5  | C2 H10 N7 O2 |
|          | 164.0923   | -10.3 | -62.8  | 0.5  | C6 H14 N O4  |
|          | 164.0712   | 10.8  | 65.8   | 5.5  | C9 H10 N O2  |
|          | 164.0671   | 14.9  | 90.8   | 1.5  | C4 H10 N3 O4 |
|          | 164.1008   | -18.8 | -114.6 | 1.5  | C H10 N9 O   |
|          | 164.1035   | -21.5 | -131.0 | 0.5  | C5 H14 N3 O3 |
|          | 164.0572   | 24.8  | 151.1  | 6.5  | C6 H6 N5 O   |
|          | 164.1075   | -25.5 | -155.4 | 4.5  | C10 H14 N O  |
|          | 164.0559   | 26.1  | 159.1  | 1.5  | C5 H10 N O5  |
|          | 164.0532   | 28.8  | 175.5  | 2.5  | C H6 N7 O3   |
|          | 164.1134   | -31.4 | -191.4 | -4.5 | C3 H18 N O6  |
|          | 164.1147   | -32.7 | -199.3 | 0.5  | C4 H14 N5 O2 |
|          | 164.0460   | 36.0  | 219.4  | 6.5  | C7 H6 N3 O2  |
|          | 164.0420   | 40.0  | 243.8  | 2.5  | C2 H6 N5 O4  |
|          | 164.0406   | 41.4  | 252.3  | -2.5 | C H10 N O8   |
|          | 164.1246   | -42.6 | -259.6 | -4.5 | C2 H18 N3 O5 |
|          | 164.1260   | -44.0 | -268.2 | 0.5  | C3 H14 N7 O  |
|          | 164.1287   | -46.7 | -284.6 | -0.5 | C7 H18 N O3  |
|          | 164.0348   | 47.2  | 287.7  | 6.5  | C8 H6 N O3   |
|          | 164.0321   | 49.9  | 304.1  | 7.5  | C4 H2 N7 O   |
|          | 164.0307   | 51.3  | 312.6  | 2.5  | C3 H6 N3 O5  |

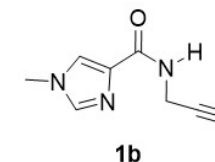

HRMS (ESI<sup>+</sup>) of **1b**

YTH2002-B1-20231016(C13)

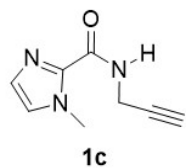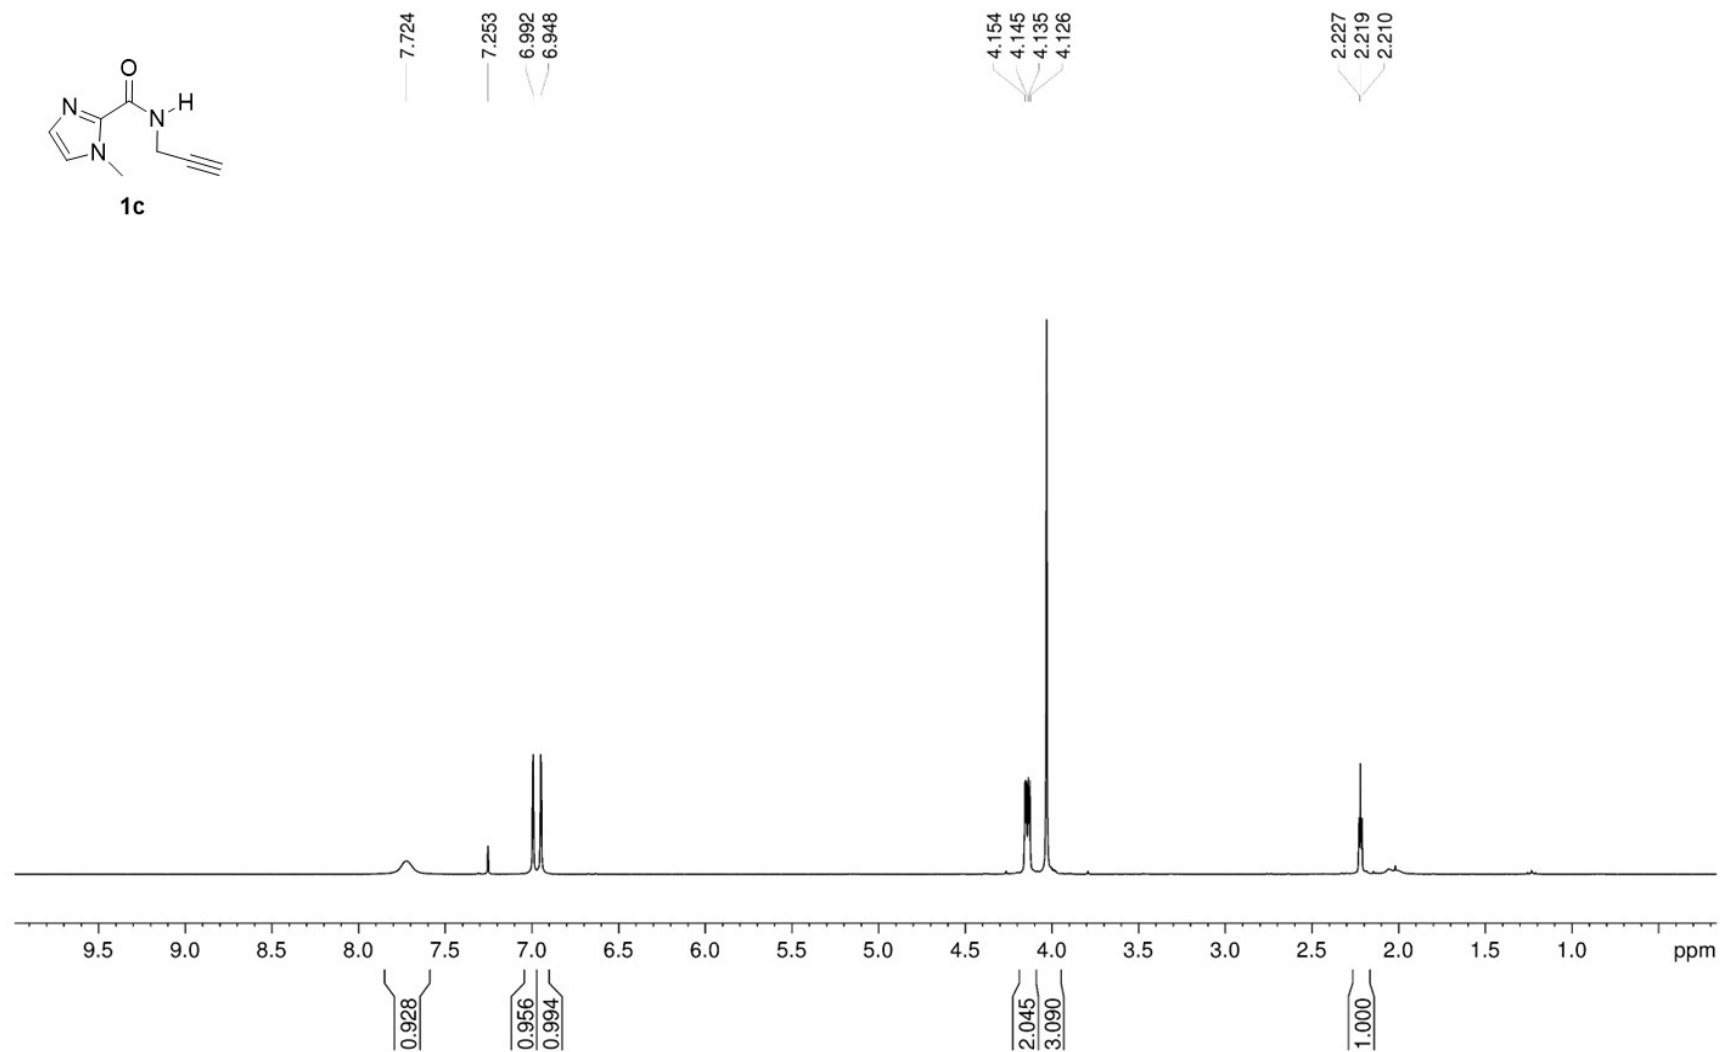

$^1\text{H}$  NMR (300 MHz,  $\text{CDCl}_3$ ) of **1c** (trace of impurity)

YTH2002-B1-20231016 (C13)

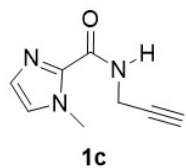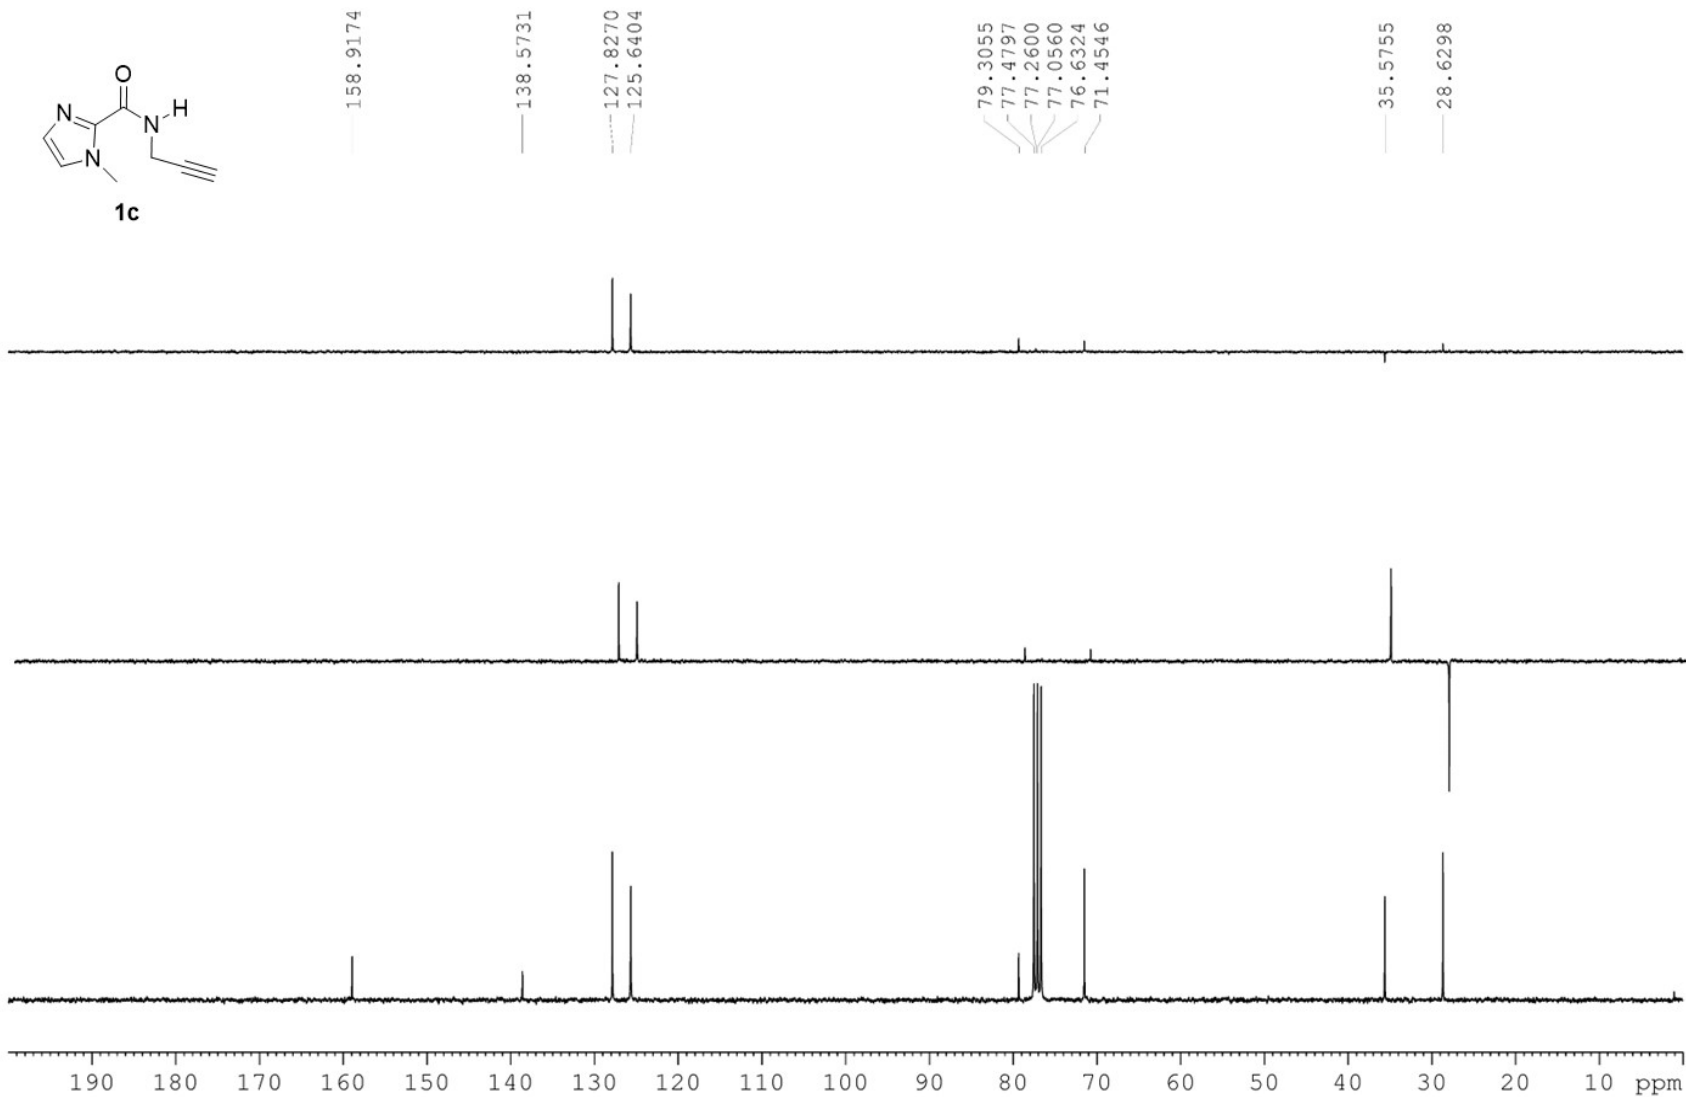

$^{13}\text{C}\{^1\text{H}\}$ -DEPT NMR (75 MHz,  $\text{CDCl}_3$ ) of **1c**

## Elemental Composition Report

### Single Mass Analysis

Tolerance = 500.0 PPM / DBE: min = -10.0, max = 100.0

Element prediction: Off

Number of isotope peaks used for i-FIT = 3

Monoisotopic Mass, Even Electron Ions

111 formula(e) evaluated with 35 results within limits (up to 25 closest results for each mass)

Elements Used:

C: 1-100 H: 1-100 N: 1-10 O: 1-10

YTH2002B1

250919FJU31 48 (0.488) Cm (46:50-(29:36+72:79))

1: TOF MS ES+  
3.27e+004

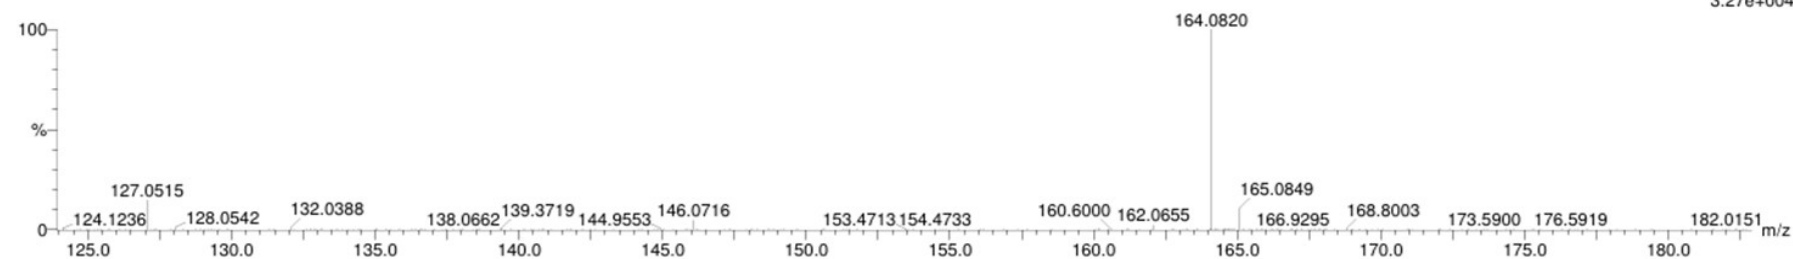

Minimum: 80.00  
Maximum: 100.00

| Mass     | RA     | Calc. Mass | mDa   | PPM    | DBE  | Formula      |
|----------|--------|------------|-------|--------|------|--------------|
| 164.0820 | 100.00 | 164.0824   | -0.4  | -2.4   | 5.5  | C8 H10 N3 O  |
|          |        | 164.0784   | 3.6   | 21.9   | 1.5  | C3 H10 N5 O3 |
|          |        | 164.0770   | 5.0   | 30.5   | -3.5 | C2 H14 N 07  |
|          |        | 164.0883   | -6.3  | -38.4  | -3.5 | C H14 N3 O6  |
|          |        | 164.0896   | -7.6  | -46.3  | 1.5  | C2 H10 N7 O2 |
|          |        | 164.0923   | -10.3 | -62.8  | 0.5  | C6 H14 N 04  |
|          |        | 164.0712   | 10.8  | 65.8   | 5.5  | C9 H10 N 02  |
|          |        | 164.0671   | 14.9  | 90.8   | 1.5  | C4 H10 N3 O4 |
|          |        | 164.1008   | -18.8 | -114.6 | 1.5  | C H10 N9 O   |
|          |        | 164.1035   | -21.5 | -131.0 | 0.5  | C5 H14 N3 O3 |
|          |        | 164.0572   | 24.8  | 151.1  | 6.5  | C6 H6 N5 O   |
|          |        | 164.1075   | -25.5 | -155.4 | 4.5  | C10 H14 N 0  |
|          |        | 164.0559   | 26.1  | 159.1  | 1.5  | C5 H10 N 05  |
|          |        | 164.0532   | 28.8  | 175.5  | 2.5  | C H6 N7 O3   |
|          |        | 164.1134   | -31.4 | -191.4 | -4.5 | C3 H18 N 06  |
|          |        | 164.1147   | -32.7 | -199.3 | 0.5  | C4 H14 N5 O2 |
|          |        | 164.0460   | 36.0  | 219.4  | 6.5  | C7 H6 N3 O2  |
|          |        | 164.0420   | 40.0  | 243.8  | 2.5  | C2 H6 N5 O4  |
|          |        | 164.0406   | 41.4  | 252.3  | -2.5 | C H10 N 08   |
|          |        | 164.1246   | -42.6 | -259.6 | -4.5 | C2 H18 N3 O5 |
|          |        | 164.1260   | -44.0 | -268.2 | 0.5  | C3 H14 N7 O  |
|          |        | 164.1287   | -46.7 | -284.6 | -0.5 | C7 H18 N 03  |
|          |        | 164.0348   | 47.2  | 287.7  | 6.5  | C8 H6 N 03   |
|          |        | 164.0321   | 49.9  | 304.1  | 7.5  | C4 H2 N7 O   |
|          |        | 164.0307   | 51.3  | 312.6  | 2.5  | C3 H6 N3 O5  |

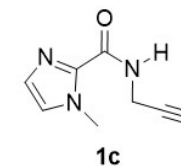

HRMS (ESI<sup>+</sup>) of **1c**

YTH1011-B-20230106

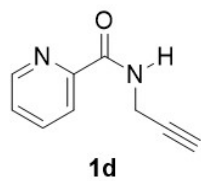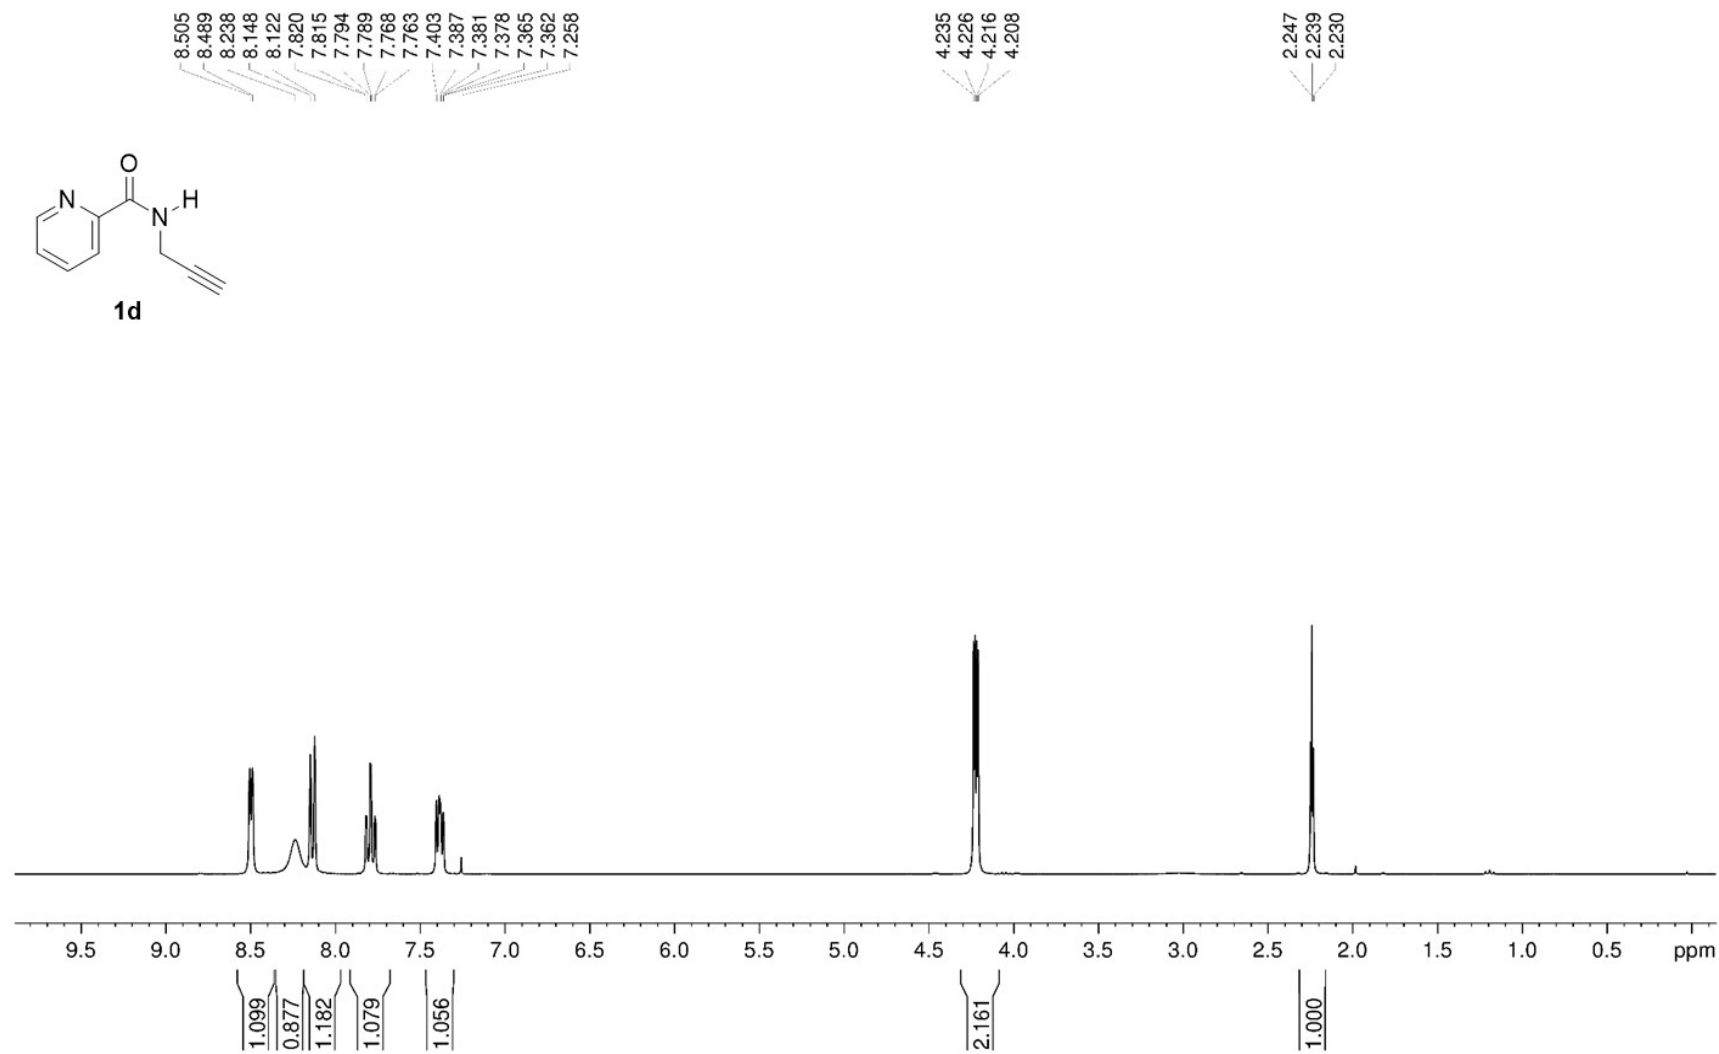

$^1\text{H}$  NMR (300 MHz,  $\text{CDCl}_3$ ) of **1d**

YTH2031-B-20231017 (C13)

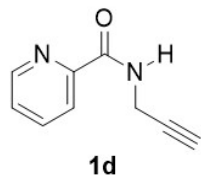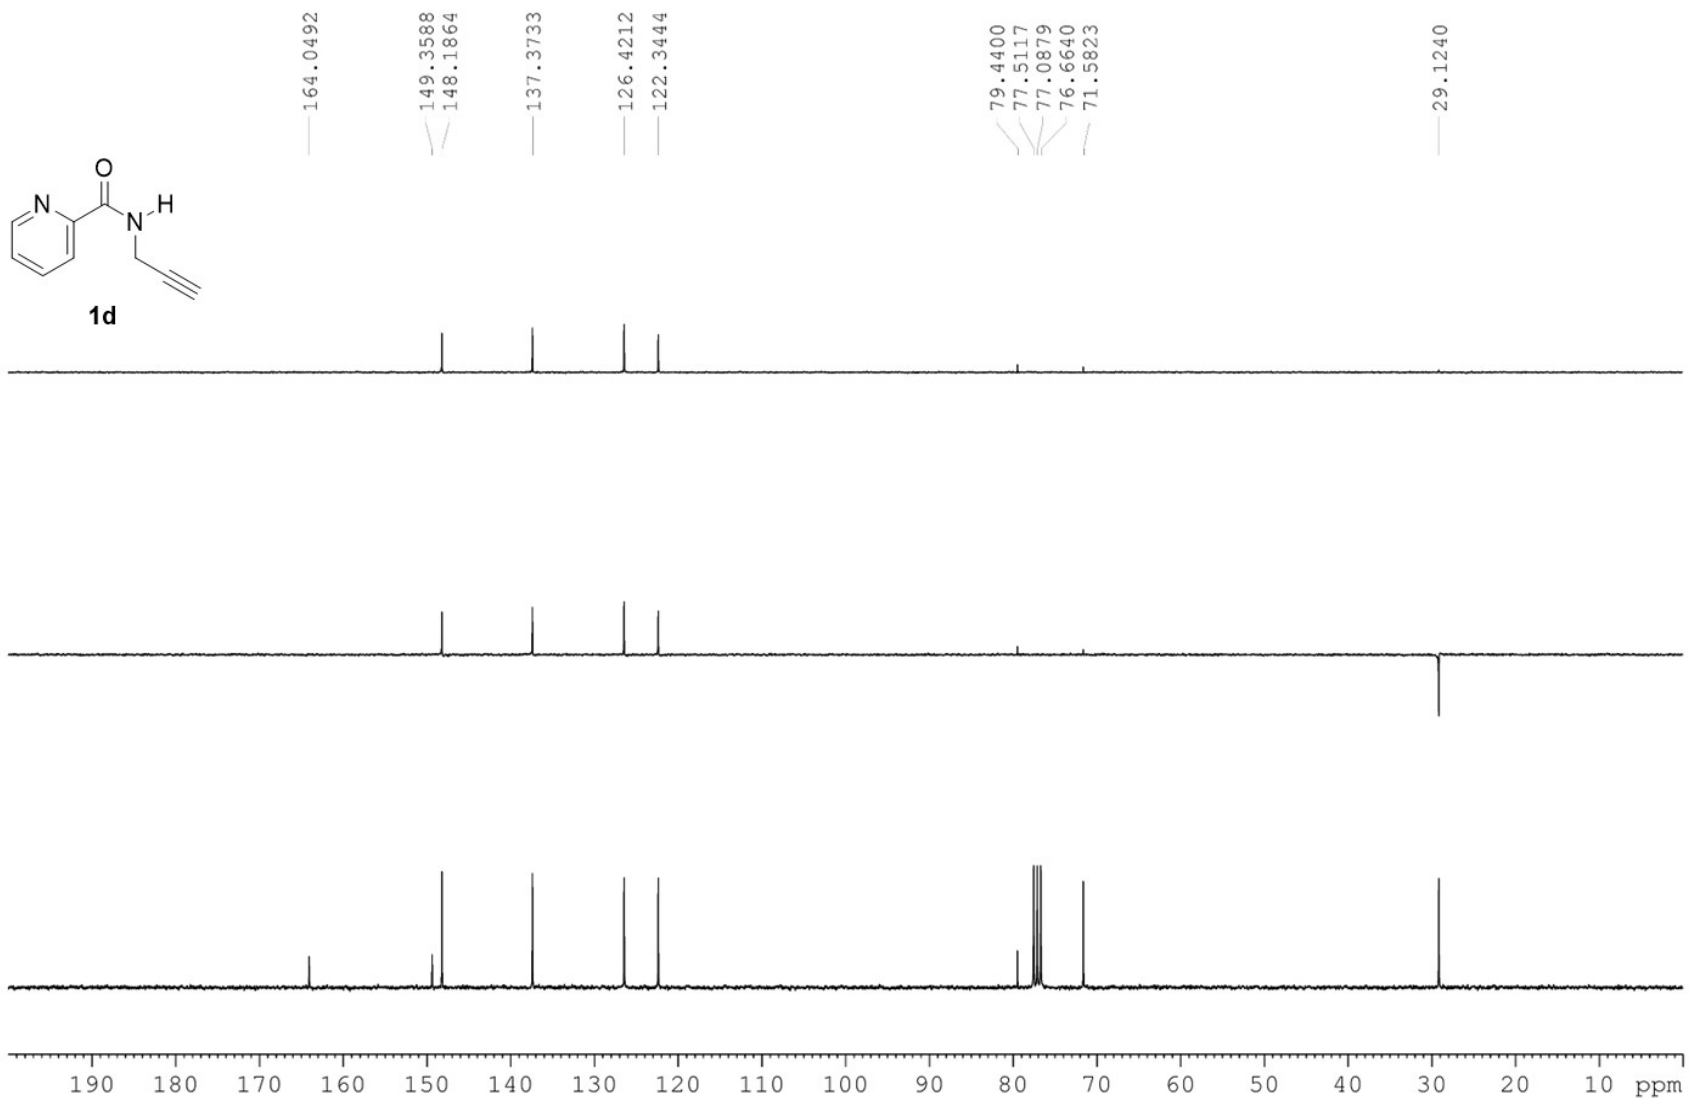

$^{13}\text{C}\{^1\text{H}\}$ -DEPT NMR (75 MHz,  $\text{CDCl}_3$ ) of **1d**

## Elemental Composition Report

Page 1

### Single Mass Analysis

Tolerance = 500.0 PPM / DBE: min = -10.0, max = 100.0

Element prediction: Off

Number of isotope peaks used for i-FIT = 3

Monoisotopic Mass, Even Electron Ions

113 formula(e) evaluated with 28 results within limits (up to 25 closest results for each mass)

Elements Used:

C: 1-100 H: 1-100 N: 1-10 O: 1-10

YTH3177B

260108FJU01-3 184 (1.812) Cm (182:187-(167:175+212:219))

1: TOF MS ES+  
2.23e+005

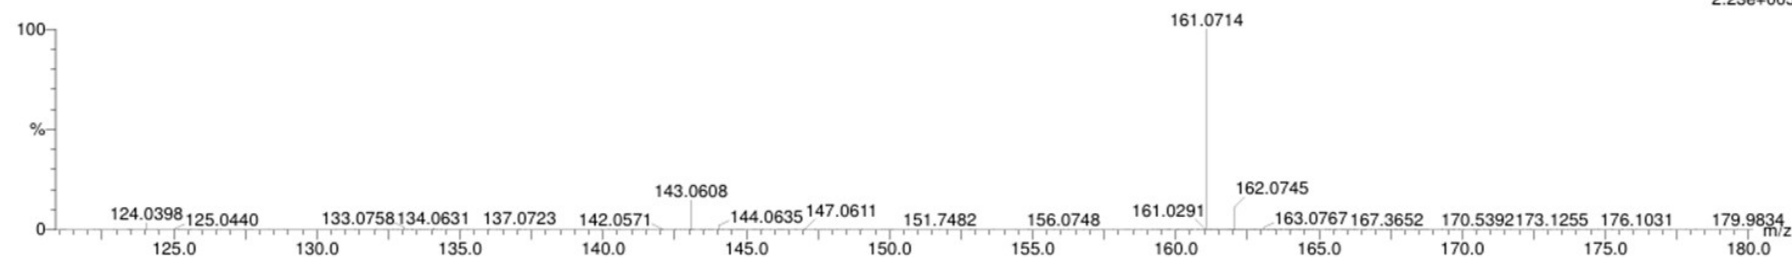

Minimum: 80.00  
Maximum: 100.00

| Mass     | RA     | Calc. Mass | mDa   | PPM    | DBE  | Formula      |
|----------|--------|------------|-------|--------|------|--------------|
| 161.0714 | 100.00 | 161.0715   | -0.1  | -0.6   | 6.5  | C9 H9 N2 O   |
|          |        | 161.0675   | 3.9   | 24.2   | 2.5  | C4 H9 N4 O3  |
|          |        | 161.0774   | -6.0  | -37.3  | -2.5 | C2 H13 N2 O6 |
|          |        | 161.0787   | -7.3  | -45.3  | 2.5  | C3 H9 N6 O2  |
|          |        | 161.0562   | 15.2  | 94.4   | 2.5  | C5 H9 N2 O4  |
|          |        | 161.0886   | -17.2 | -106.8 | -2.5 | C H13 N4 O5  |
|          |        | 161.0535   | 17.9  | 111.1  | 3.5  | C H5 N8 O2   |
|          |        | 161.0899   | -18.5 | -114.9 | 2.5  | C2 H9 N8 O   |
|          |        | 161.0926   | -21.2 | -131.6 | 1.5  | C6 H13 N2 O3 |
|          |        | 161.0463   | 25.1  | 155.8  | 7.5  | C7 H5 N4 O   |
|          |        | 161.0423   | 29.1  | 180.7  | 3.5  | C2 H5 N6 O3  |
|          |        | 161.0410   | 30.4  | 188.7  | -1.5 | C H9 N2 O7   |
|          |        | 161.1039   | -32.5 | -201.8 | 1.5  | C5 H13 N4 O2 |
|          |        | 161.0351   | 36.3  | 225.4  | 7.5  | C8 H5 N2 O2  |
|          |        | 161.0311   | 40.3  | 250.2  | 3.5  | C3 H5 N4 O4  |
|          |        | 161.1137   | -42.3 | -262.6 | -3.5 | C3 H17 N2 O5 |
|          |        | 161.1151   | -43.7 | -271.3 | 1.5  | C4 H13 N6 O  |
|          |        | 161.0212   | 50.2  | 311.7  | 8.5  | C5 H N6 O    |
|          |        | 161.0198   | 51.6  | 320.4  | 3.5  | C4 H5 N2 O5  |
|          |        | 161.1250   | -53.6 | -332.8 | -3.5 | C2 H17 N4 O4 |
|          |        | 161.1290   | -57.6 | -357.6 | 0.5  | C7 H17 N2 O2 |
|          |        | 161.0100   | 61.4  | 381.2  | 8.5  | C6 H N4 O2   |
|          |        | 161.1362   | -64.8 | -402.3 | -3.5 | C H17 N6 O3  |
|          |        | 161.0059   | 65.5  | 406.7  | 4.5  | C H N6 O4    |
|          |        | 161.1402   | -68.8 | -427.1 | 0.5  | C6 H17 N4 O  |

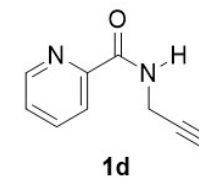

HRMS (ESI<sup>+</sup>) of **1d**

YTH3162-B-20251020

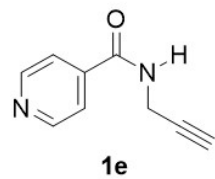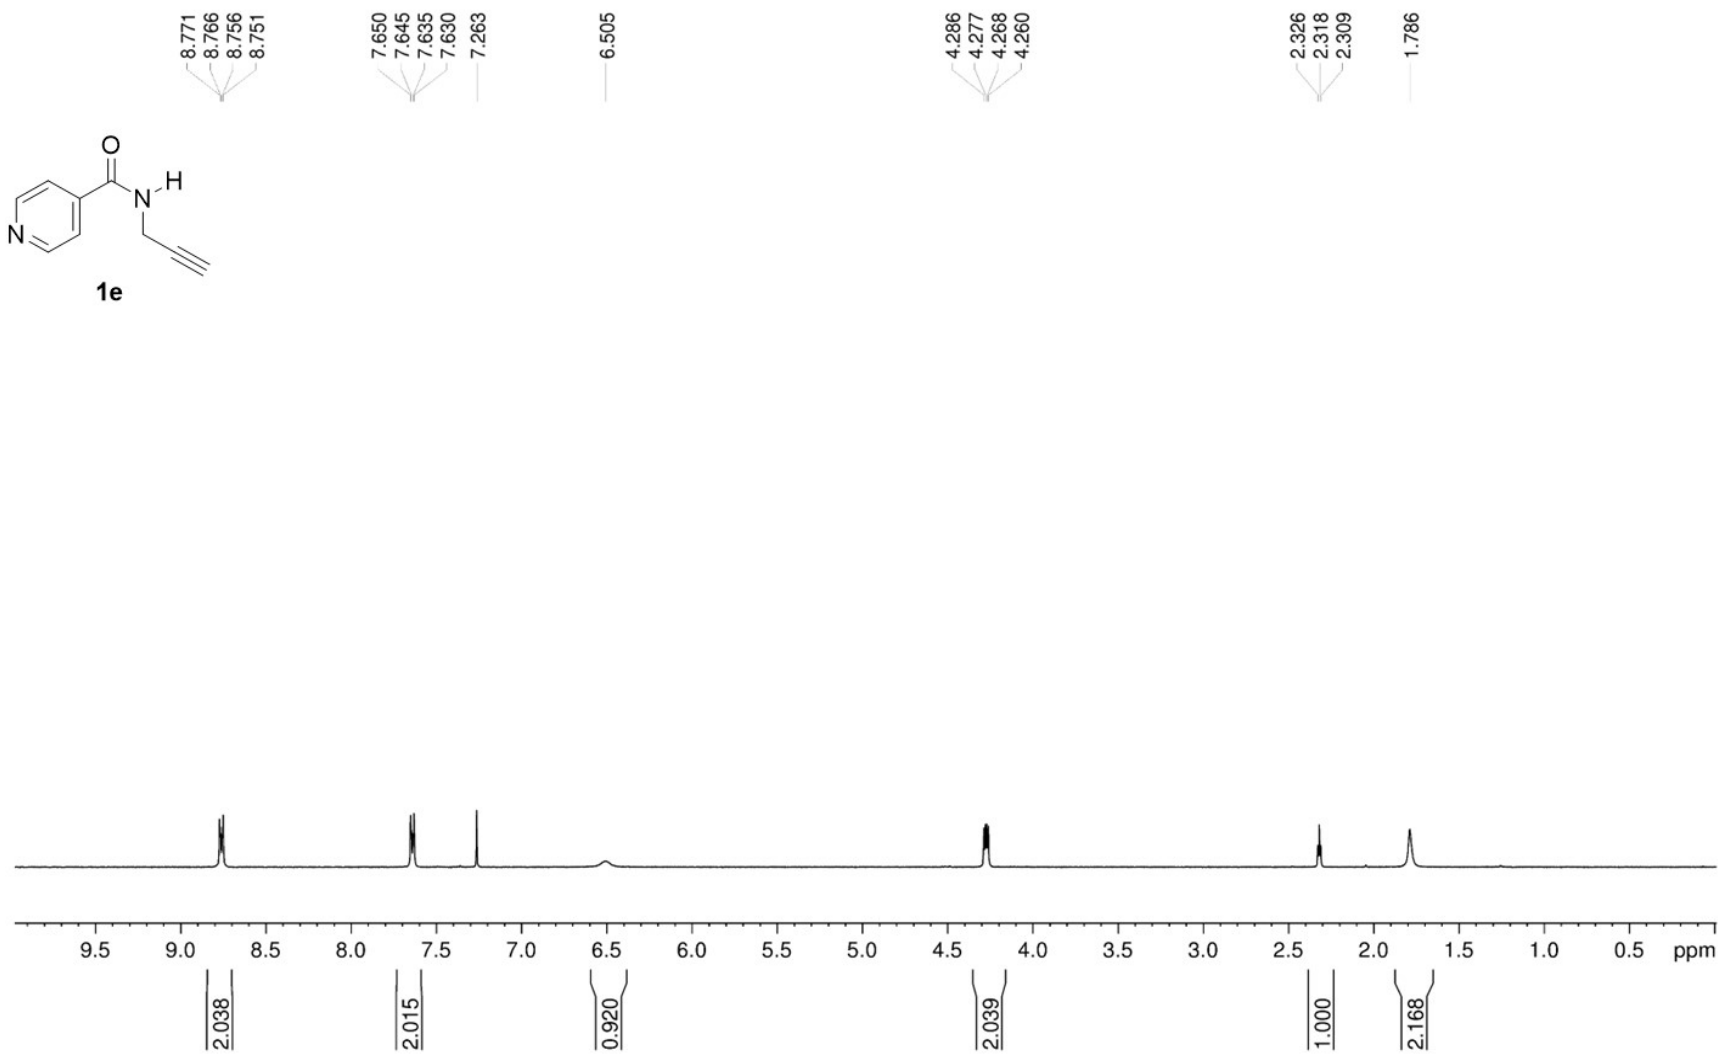

$^1\text{H}$  NMR (300 MHz,  $\text{CDCl}_3$ ) of **1e**

YTH3162-B-20251021

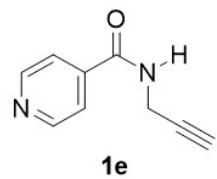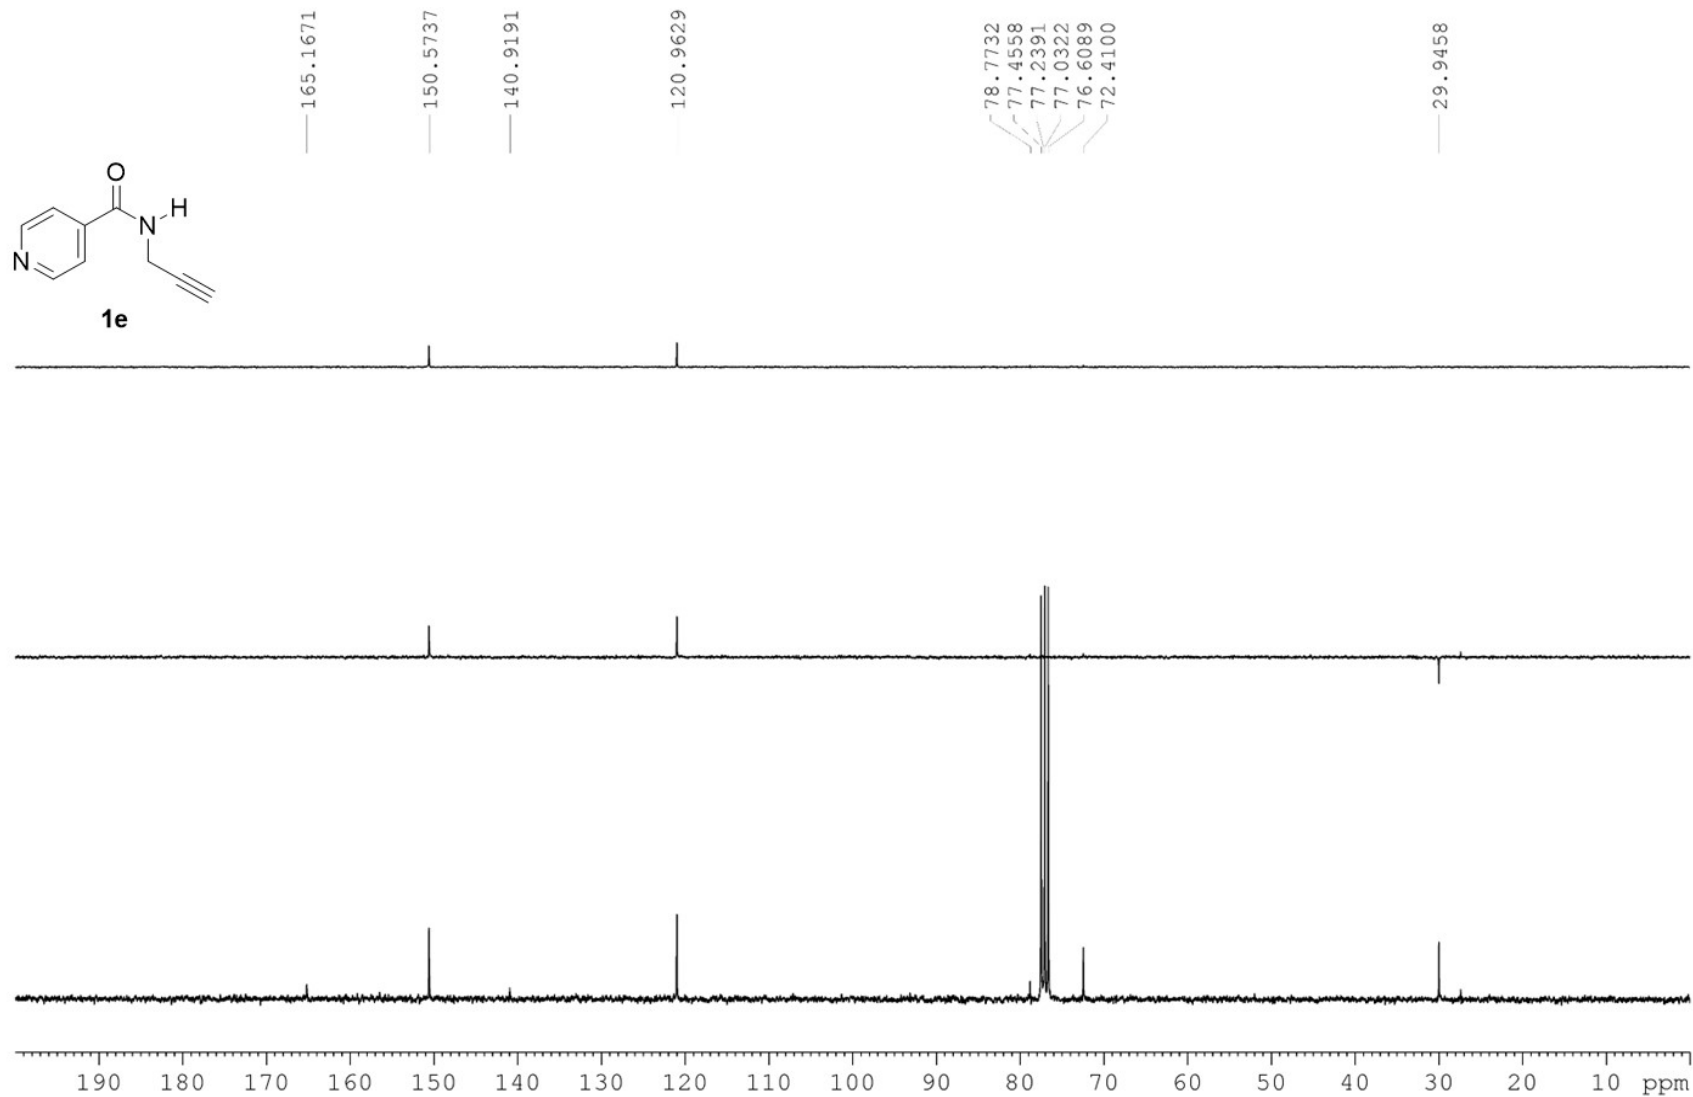

$^{13}\text{C}\{^1\text{H}\}$ -DEPT NMR (75 MHz,  $\text{CDCl}_3$ ) of **1e**

## Elemental Composition Report

### Single Mass Analysis

Tolerance = 500.0 PPM / DBE: min = -10.0, max = 100.0

Element prediction: Off

Number of isotope peaks used for i-FIT = 3

Monoisotopic Mass, Even Electron Ions

113 formula(e) evaluated with 28 results within limits (up to 25 closest results for each mass)

Elements Used:

C: 1-100 H: 1-100 N: 1-10 O: 1-10

YTH3162B

251211FJU01-3 59 (0.602) Cm (56:62-(37:45+90:97))

1: TOF MS ES+  
1.58e+005

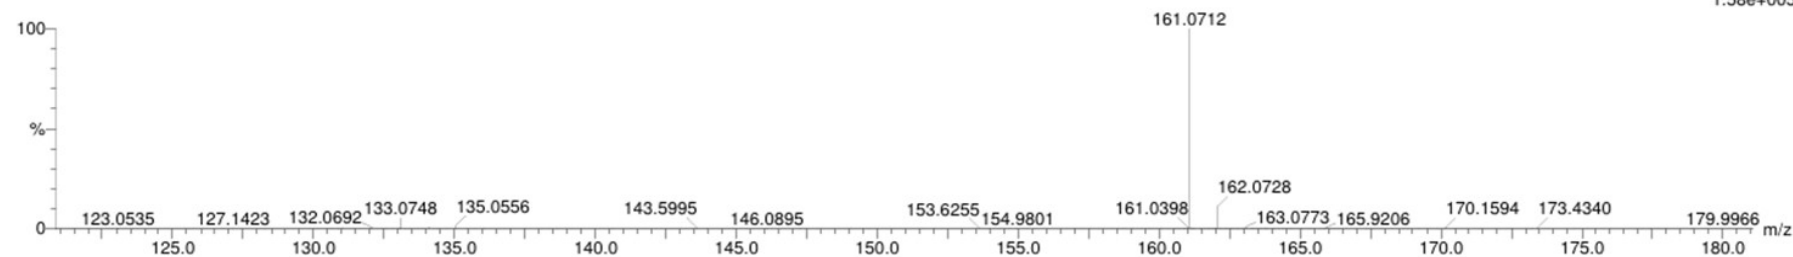

Minimum: 80.00  
Maximum: 100.00

| Mass     | RA     | Calc. Mass | mDa   | PPM    | DBE  | Formula      |
|----------|--------|------------|-------|--------|------|--------------|
| 161.0712 | 100.00 | 161.0715   | -0.3  | -1.9   | 6.5  | C9 H9 N2 O   |
|          |        | 161.0675   | 3.7   | 23.0   | 2.5  | C4 H9 N4 O3  |
|          |        | 161.0774   | -6.2  | -38.5  | -2.5 | C2 H13 N2 O6 |
|          |        | 161.0787   | -7.5  | -46.6  | 2.5  | C3 H9 N6 O2  |
|          |        | 161.0562   | 15.0  | 93.1   | 2.5  | C5 H9 N2 O4  |
|          |        | 161.0886   | -17.4 | -108.0 | -2.5 | C H13 N4 O5  |
|          |        | 161.0535   | 17.7  | 109.9  | 3.5  | C H5 N8 O2   |
|          |        | 161.0899   | -18.7 | -116.1 | 2.5  | C2 H9 N8 O   |
|          |        | 161.0926   | -21.4 | -132.9 | 1.5  | C6 H13 N2 O3 |
|          |        | 161.0463   | 24.9  | 154.6  | 7.5  | C7 H5 N4 O   |
|          |        | 161.0423   | 28.9  | 179.4  | 3.5  | C2 H5 N6 O3  |
|          |        | 161.0410   | 30.2  | 187.5  | -1.5 | C H9 N2 O7   |
|          |        | 161.1039   | -32.7 | -203.0 | 1.5  | C5 H13 N4 O2 |
|          |        | 161.0351   | 36.1  | 224.1  | 7.5  | C8 H5 N2 O2  |
|          |        | 161.0311   | 40.1  | 249.0  | 3.5  | C3 H5 N4 O4  |
|          |        | 161.1137   | -42.5 | -263.9 | -3.5 | C3 H17 N2 O5 |
|          |        | 161.1151   | -43.9 | -272.6 | 1.5  | C4 H13 N6 O  |
|          |        | 161.0212   | 50.0  | 310.4  | 8.5  | C5 H N6 O    |
|          |        | 161.0198   | 51.4  | 319.1  | 3.5  | C4 H5 N2 O5  |
|          |        | 161.1250   | -53.8 | -334.0 | -3.5 | C2 H17 N4 O4 |
|          |        | 161.1290   | -57.8 | -358.8 | 0.5  | C7 H17 N2 O2 |
|          |        | 161.0100   | 61.2  | 380.0  | 8.5  | C6 H N4 O2   |
|          |        | 161.1362   | -65.0 | -403.5 | -3.5 | C H17 N6 O3  |
|          |        | 161.0059   | 65.3  | 405.4  | 4.5  | C H N6 O4    |
|          |        | 161.1402   | -69.0 | -428.4 | 0.5  | C6 H17 N4 O  |

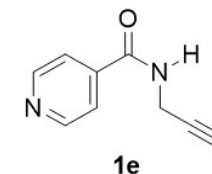

HRMS (ESI<sup>+</sup>) of **1e**

YTH3161-B-20251017

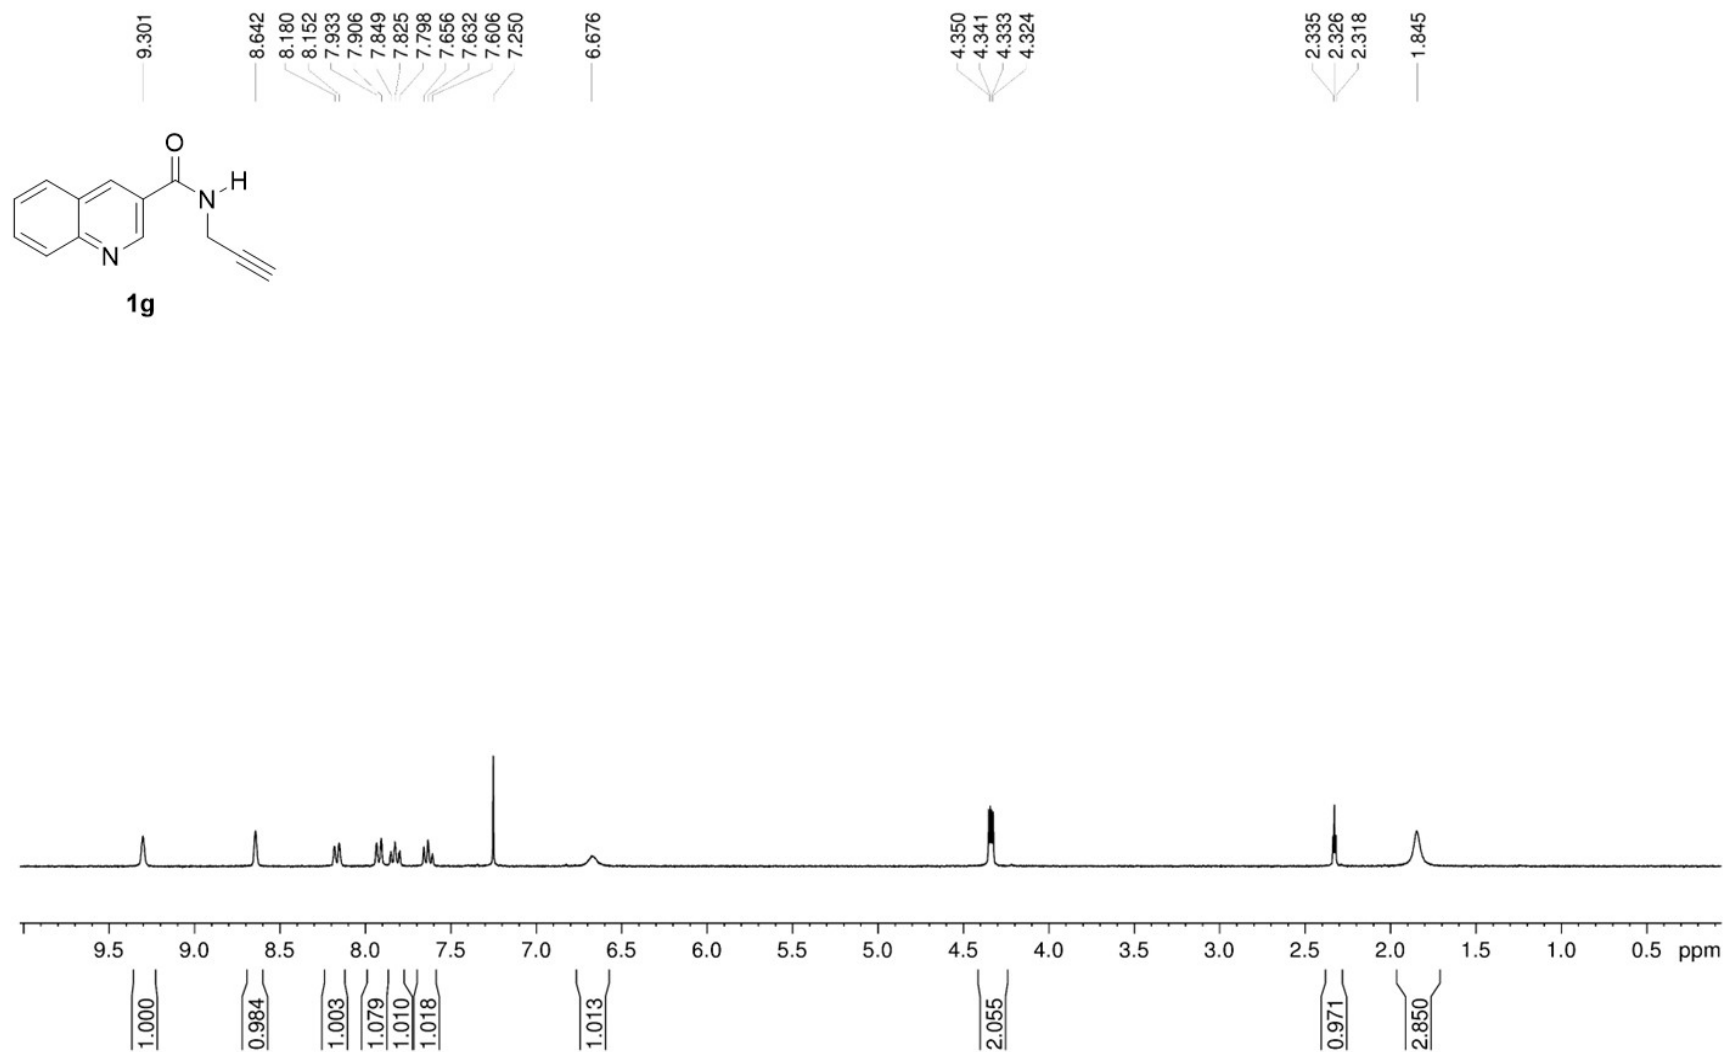

<sup>1</sup>H NMR (300 MHz, CDCl<sub>3</sub>) of **1g**

YTH3161-B-20251104

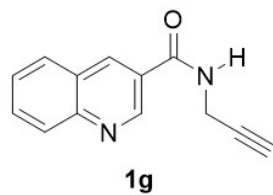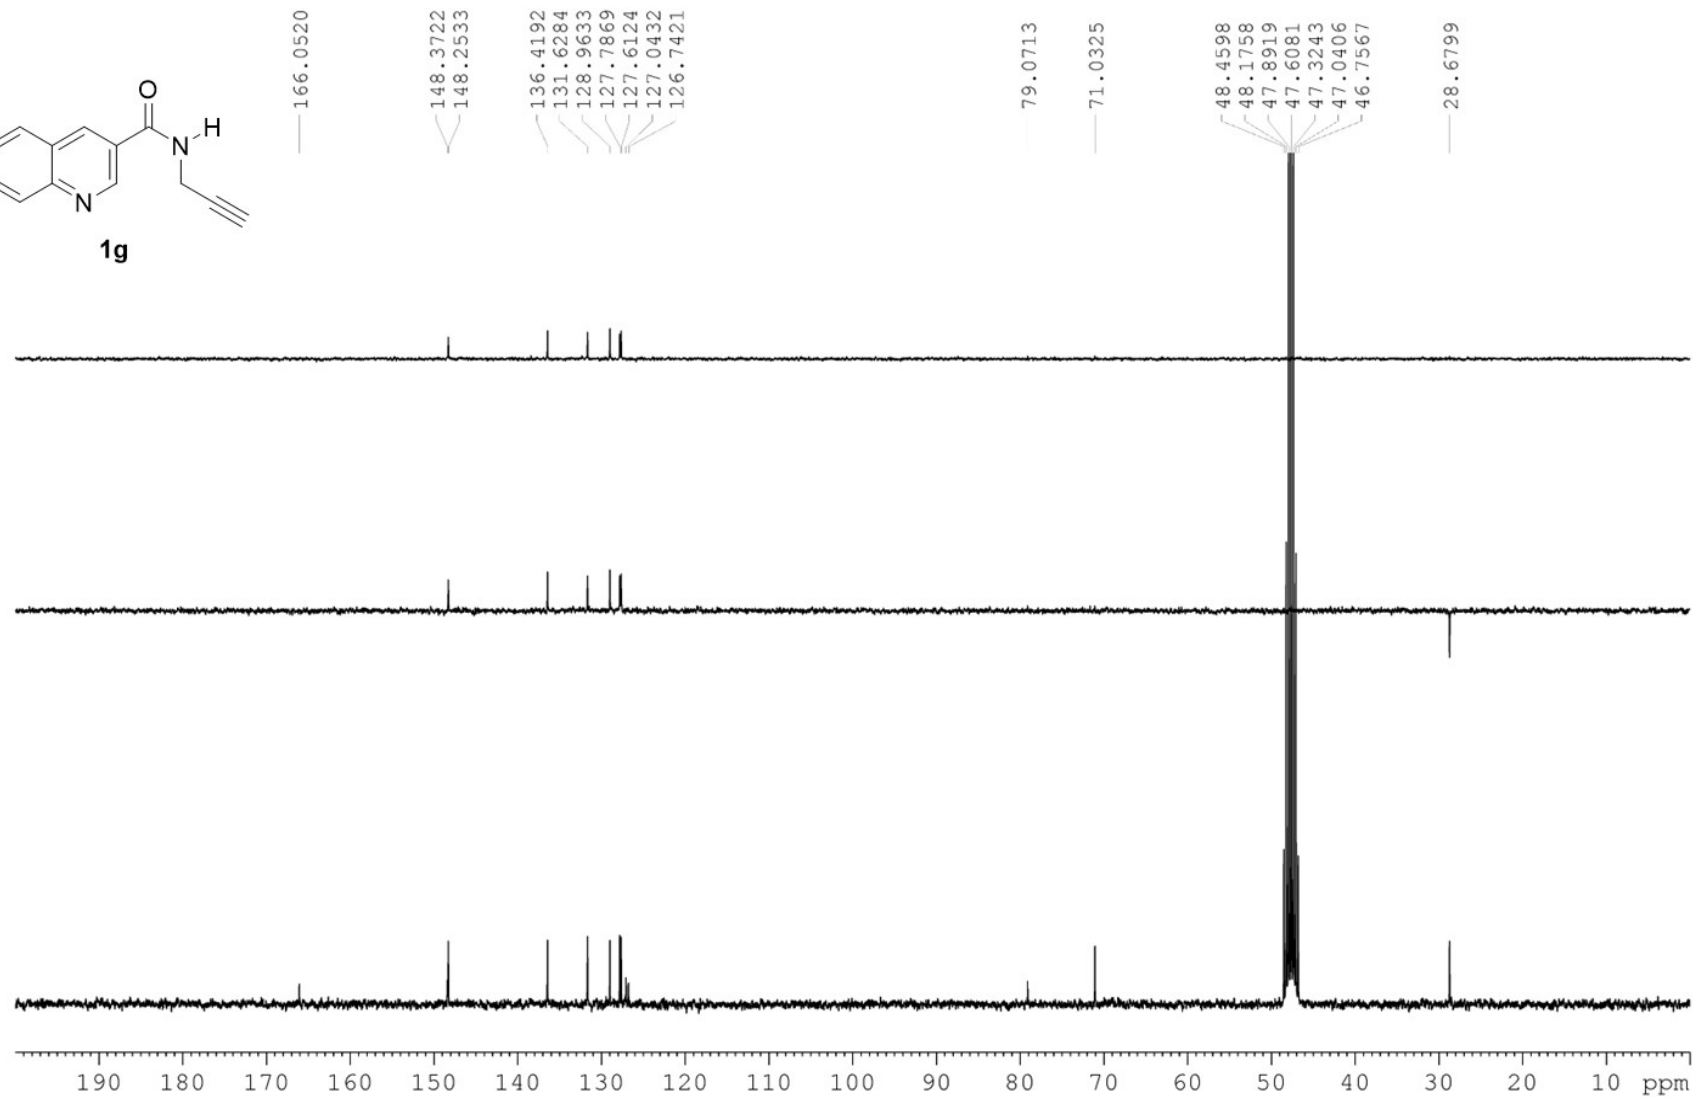

$^{13}\text{C}\{^1\text{H}\}$ -DEPT NMR (75 MHz,  $\text{CD}_3\text{OD}$ ) of **1g**

## Elemental Composition Report

Page 1

### Single Mass Analysis

Tolerance = 500.0 PPM / DBE: min = -10.0, max = 100.0

Element prediction: Off

Number of isotope peaks used for i-FIT = 3

Monoisotopic Mass, Even Electron Ions

218 formula(e) evaluated with 62 results within limits (up to 25 closest results for each mass)

Elements Used:

C: 1-100 H: 1-100 N: 1-10 O: 1-10

YTH3161B

251210FJU02 155 (1.524) Cm (151:156-(136:144+178:185))

1: TOF MS ES+  
4.98e+004

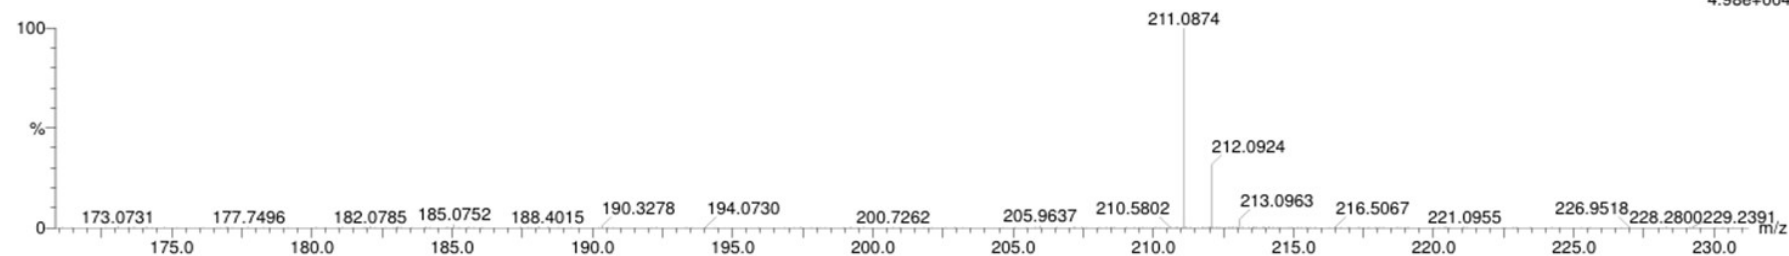

Minimum: 80.00  
Maximum: 100.00

| Mass     | RA     | Calc. Mass | mDa   | PPM    | DBE  | Formula       |
|----------|--------|------------|-------|--------|------|---------------|
| 211.0874 | 100.00 | 211.0871   | 0.3   | 1.4    | 9.5  | C13 H11 N2 O  |
|          |        | 211.0890   | -1.6  | -7.6   | -3.5 | C H15 N4 O8   |
|          |        | 211.0903   | -2.9  | -13.7  | 1.5  | C2 H11 N8 O4  |
|          |        | 211.0831   | 4.3   | 20.4   | 5.5  | C8 H11 N4 O3  |
|          |        | 211.0930   | -5.6  | -26.5  | 0.5  | C6 H15 N2 O6  |
|          |        | 211.0943   | -6.9  | -32.7  | 5.5  | C7 H11 N6 O2  |
|          |        | 211.0804   | 7.0   | 33.2   | 6.5  | C4 H7 N10 O   |
|          |        | 211.0791   | 8.3   | 39.3   | 1.5  | C3 H11 N6 O5  |
|          |        | 211.0778   | 9.6   | 45.5   | -3.5 | C2 H15 N2 O9  |
|          |        | 211.1016   | -14.2 | -67.3  | 1.5  | C H11 N10 O3  |
|          |        | 211.0719   | 15.5  | 73.4   | 5.5  | C9 H11 N2 O4  |
|          |        | 211.1042   | -16.8 | -79.6  | 0.5  | C5 H15 N4 O5  |
|          |        | 211.0692   | 18.2  | 86.2   | 6.5  | C5 H7 N8 O2   |
|          |        | 211.1056   | -18.2 | -86.2  | 5.5  | C6 H11 N8 O   |
|          |        | 211.0679   | 19.5  | 92.4   | 1.5  | C4 H11 N4 O6  |
|          |        | 211.1083   | -20.9 | -99.0  | 4.5  | C10 H15 N2 O3 |
|          |        | 211.0620   | 25.4  | 120.3  | 10.5 | C11 H7 N4 O   |
|          |        | 211.1141   | -26.7 | -126.5 | -4.5 | C3 H19 N2 O8  |
|          |        | 211.1155   | -28.1 | -133.1 | 0.5  | C4 H15 N6 O4  |
|          |        | 211.0580   | 29.4  | 139.3  | 6.5  | C6 H7 N6 O3   |
|          |        | 211.0566   | 30.8  | 145.9  | 1.5  | C5 H11 N2 O7  |
|          |        | 211.1195   | -32.1 | -152.1 | 4.5  | C9 H15 N4 O2  |
|          |        | 211.0539   | 33.5  | 158.7  | 2.5  | C H7 N8 O5    |
|          |        | 211.0508   | 36.6  | 173.4  | 10.5 | C12 H7 N2 O2  |
|          |        | 211.1254   | -38.0 | -180.0 | -4.5 | C2 H19 N4 O7  |

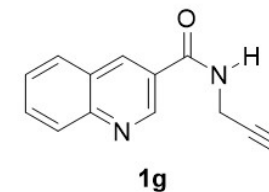

HRMS (ESI<sup>+</sup>) of **1g**

YTH3155-B-20250927

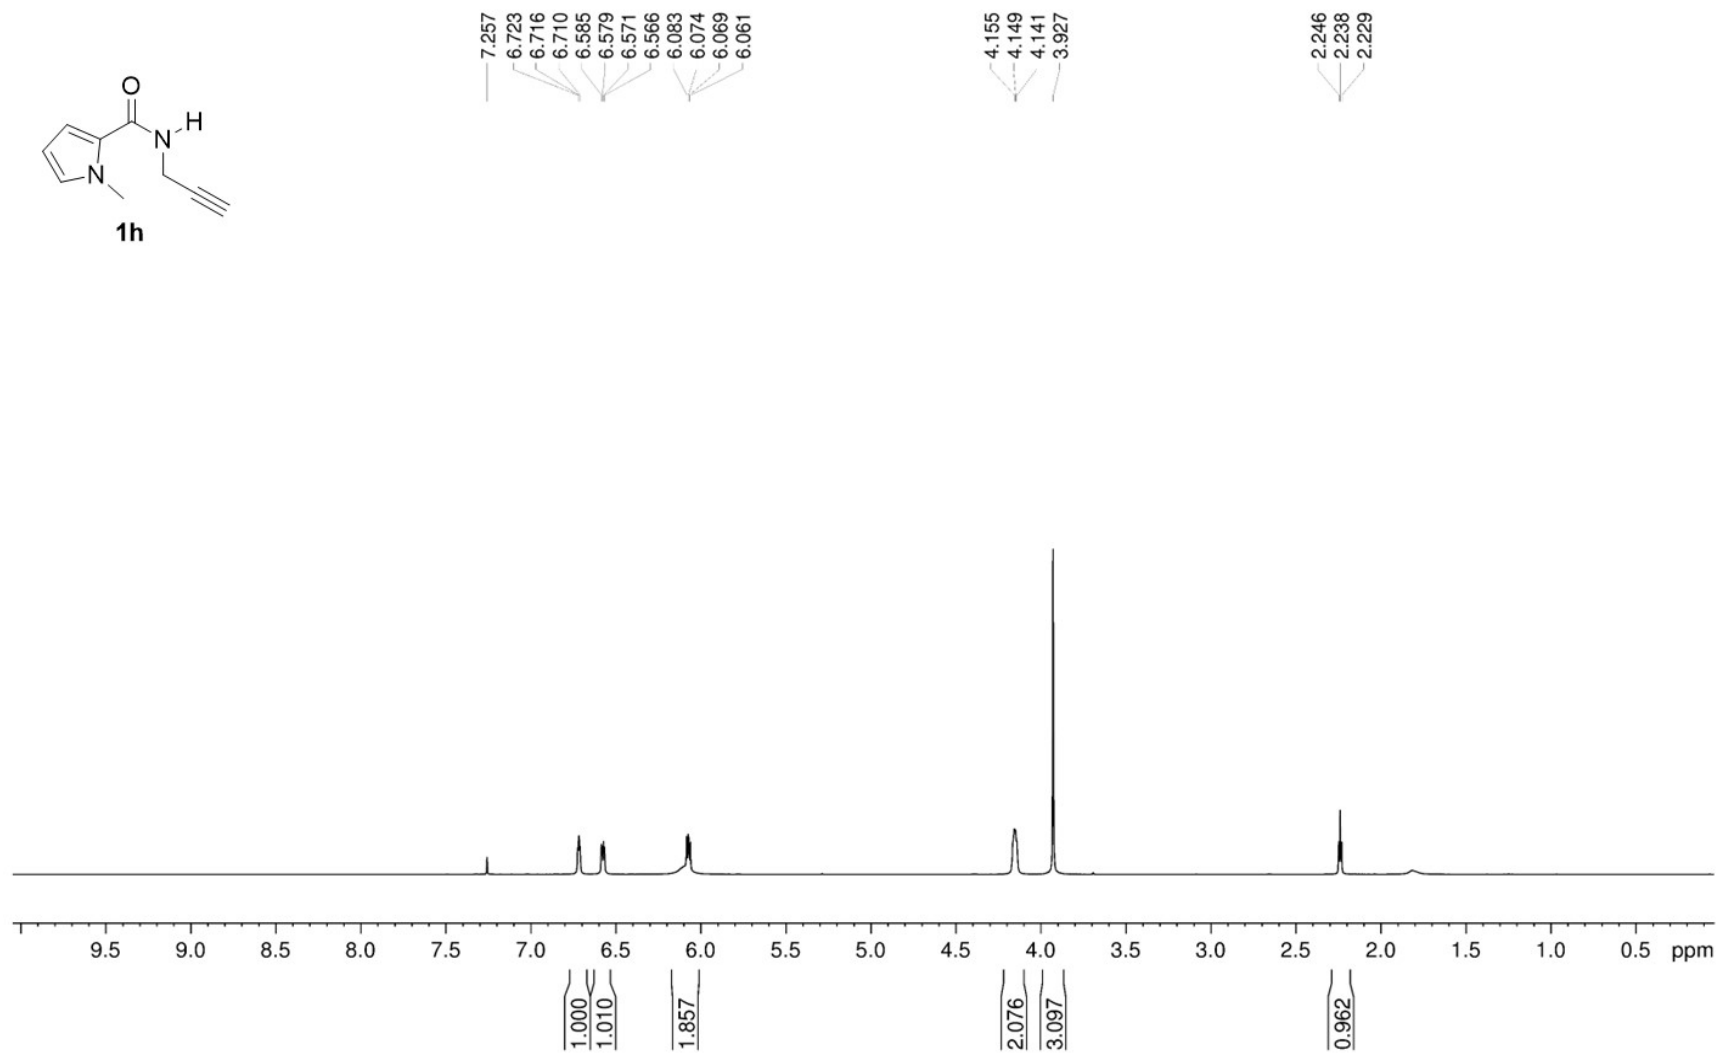

<sup>1</sup>H NMR (300 MHz, CDCl<sub>3</sub>) of **1h**

YTH3155-B-20250927

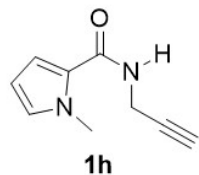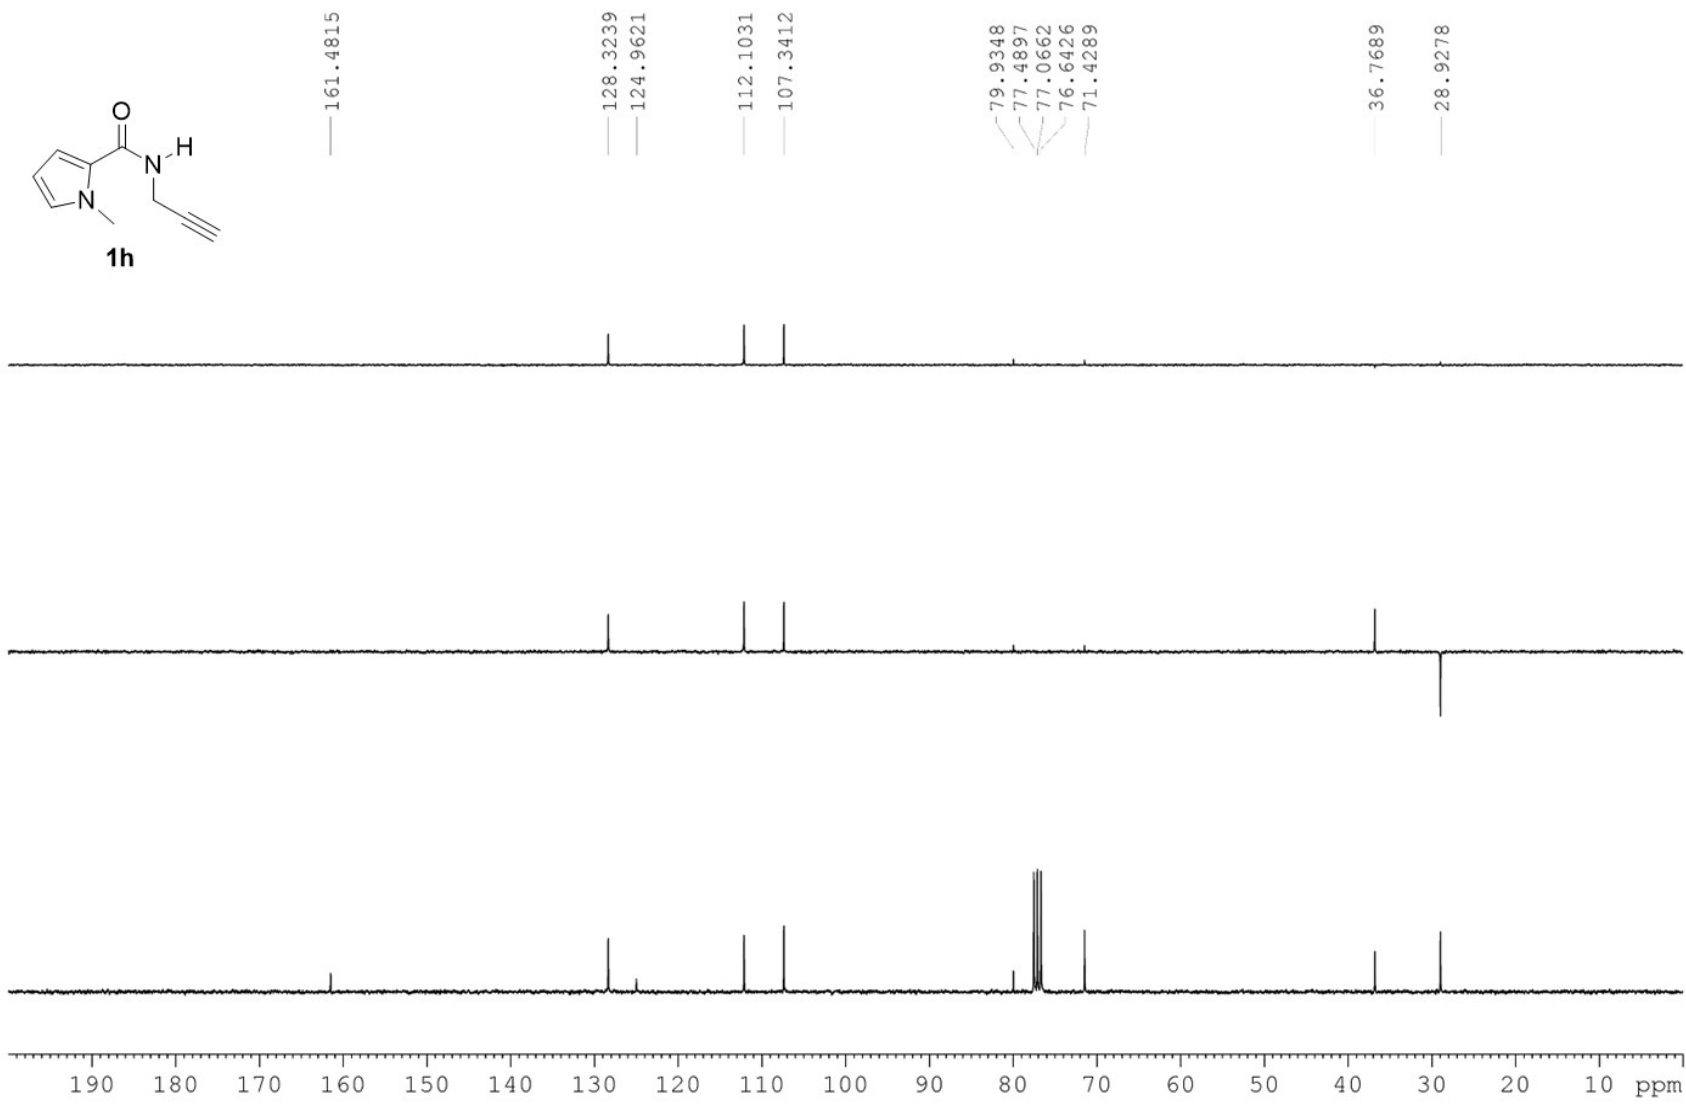

$^{13}\text{C}\{^1\text{H}\}$ -DEPT NMR (75 MHz,  $\text{CDCl}_3$ ) of **1h**

20251127\_YTH3155B#11 RT: 0.08 AV: 1 NL: 2.59E8  
T: FTMS + p ESI Full ms [120.0000-750.0000]

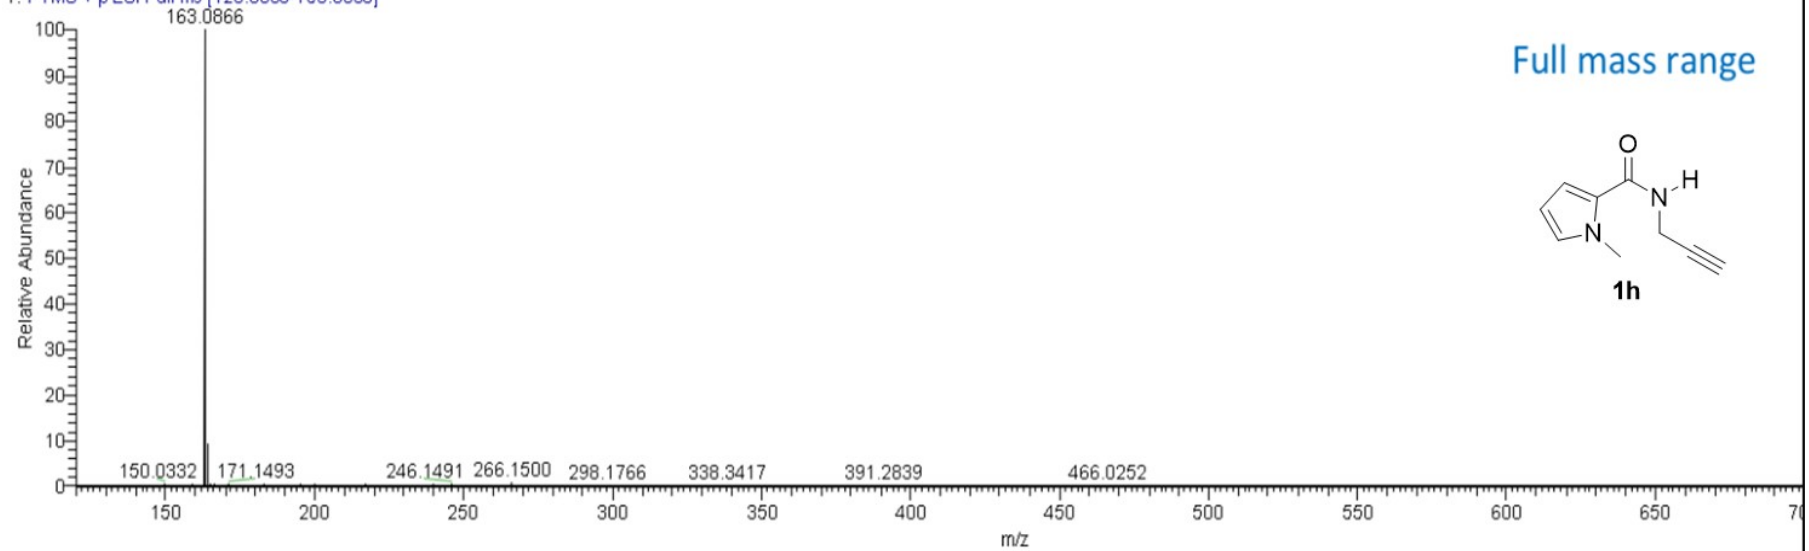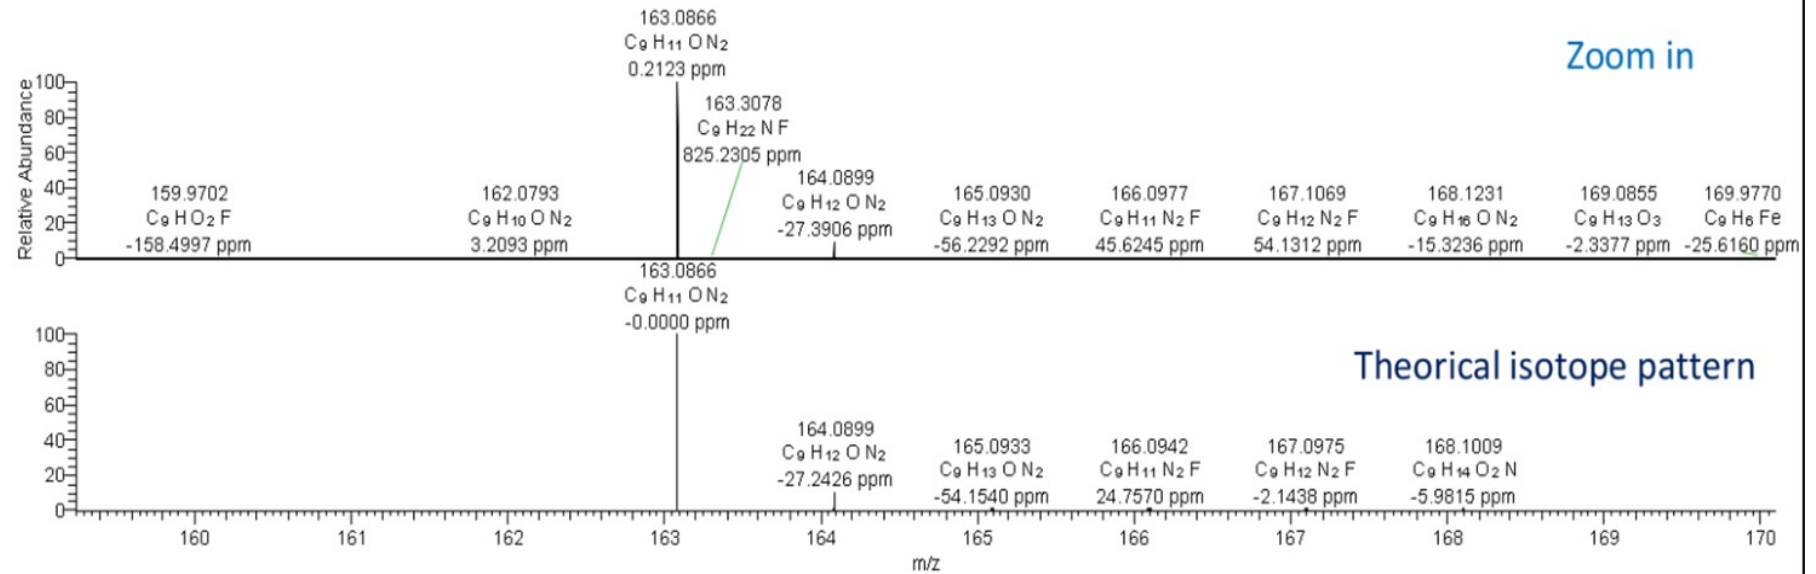

HRMS (ESI<sup>+</sup>) of **1h**

YTH3165-B-20251016

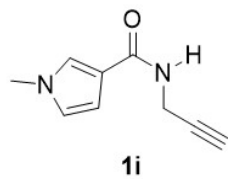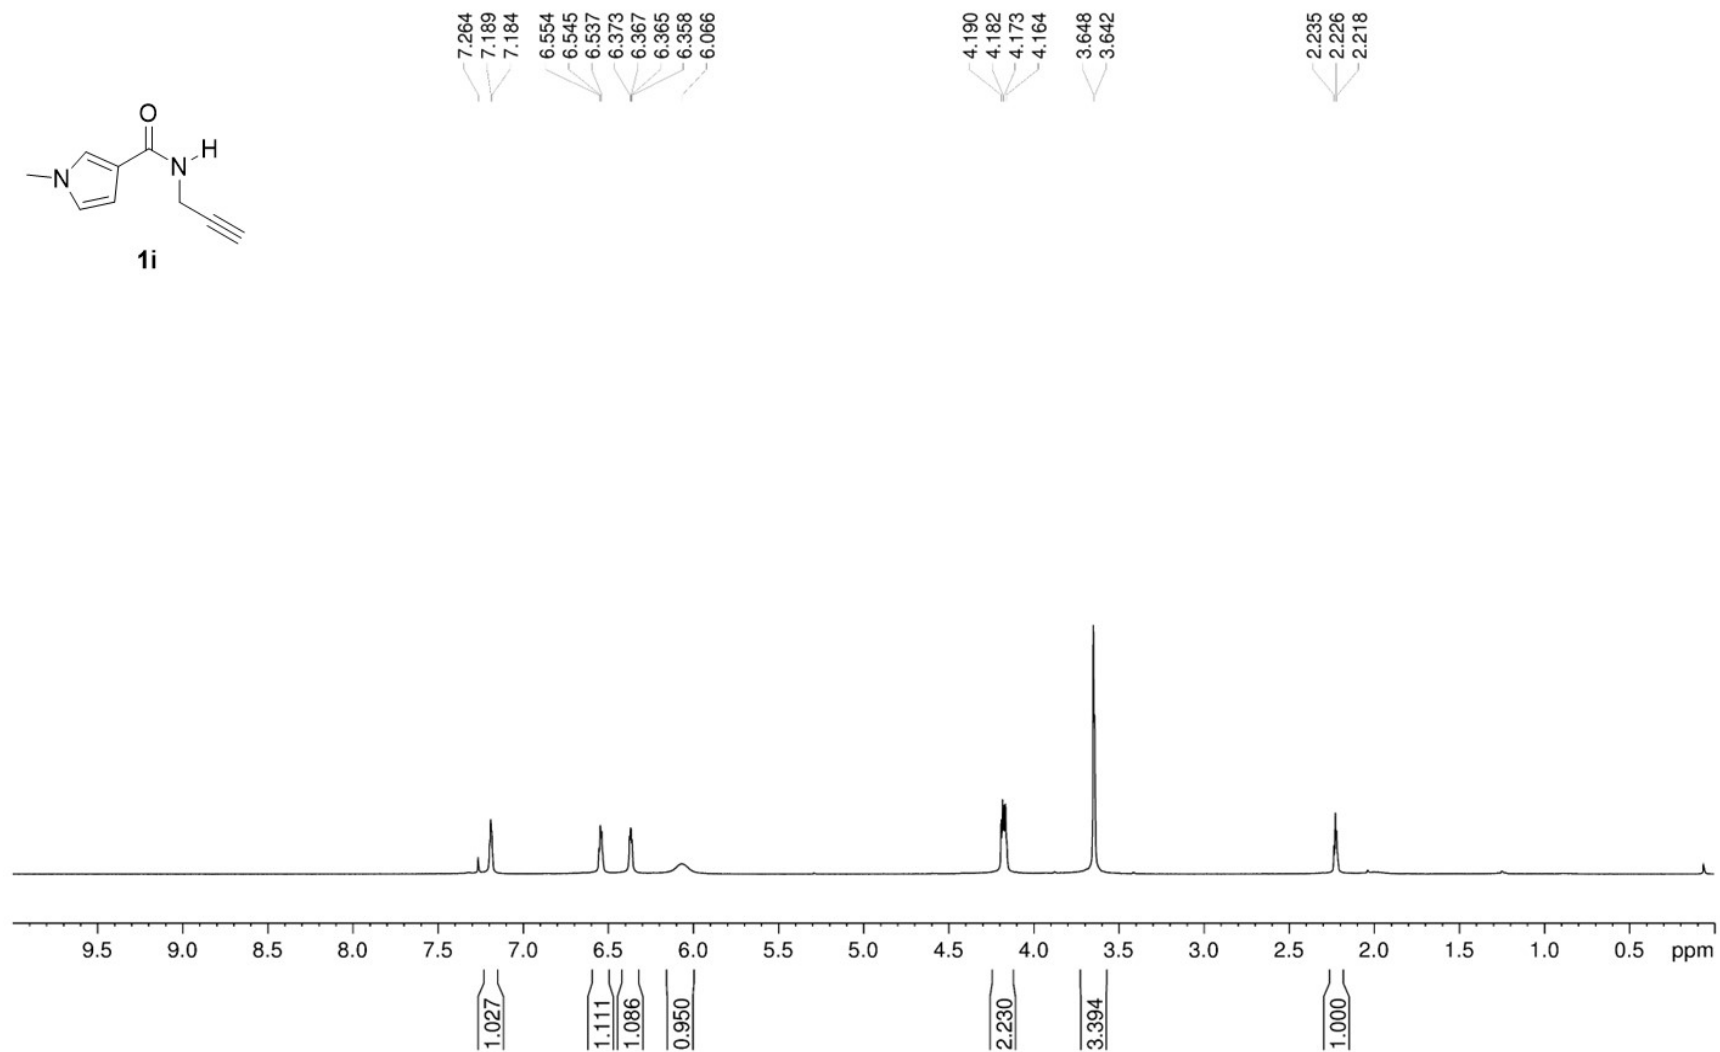

$^1\text{H}$  NMR (300 MHz,  $\text{CDCl}_3$ ) of **1i**

YTH3165-B-20251016

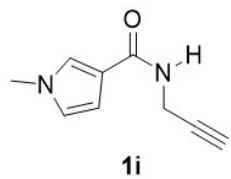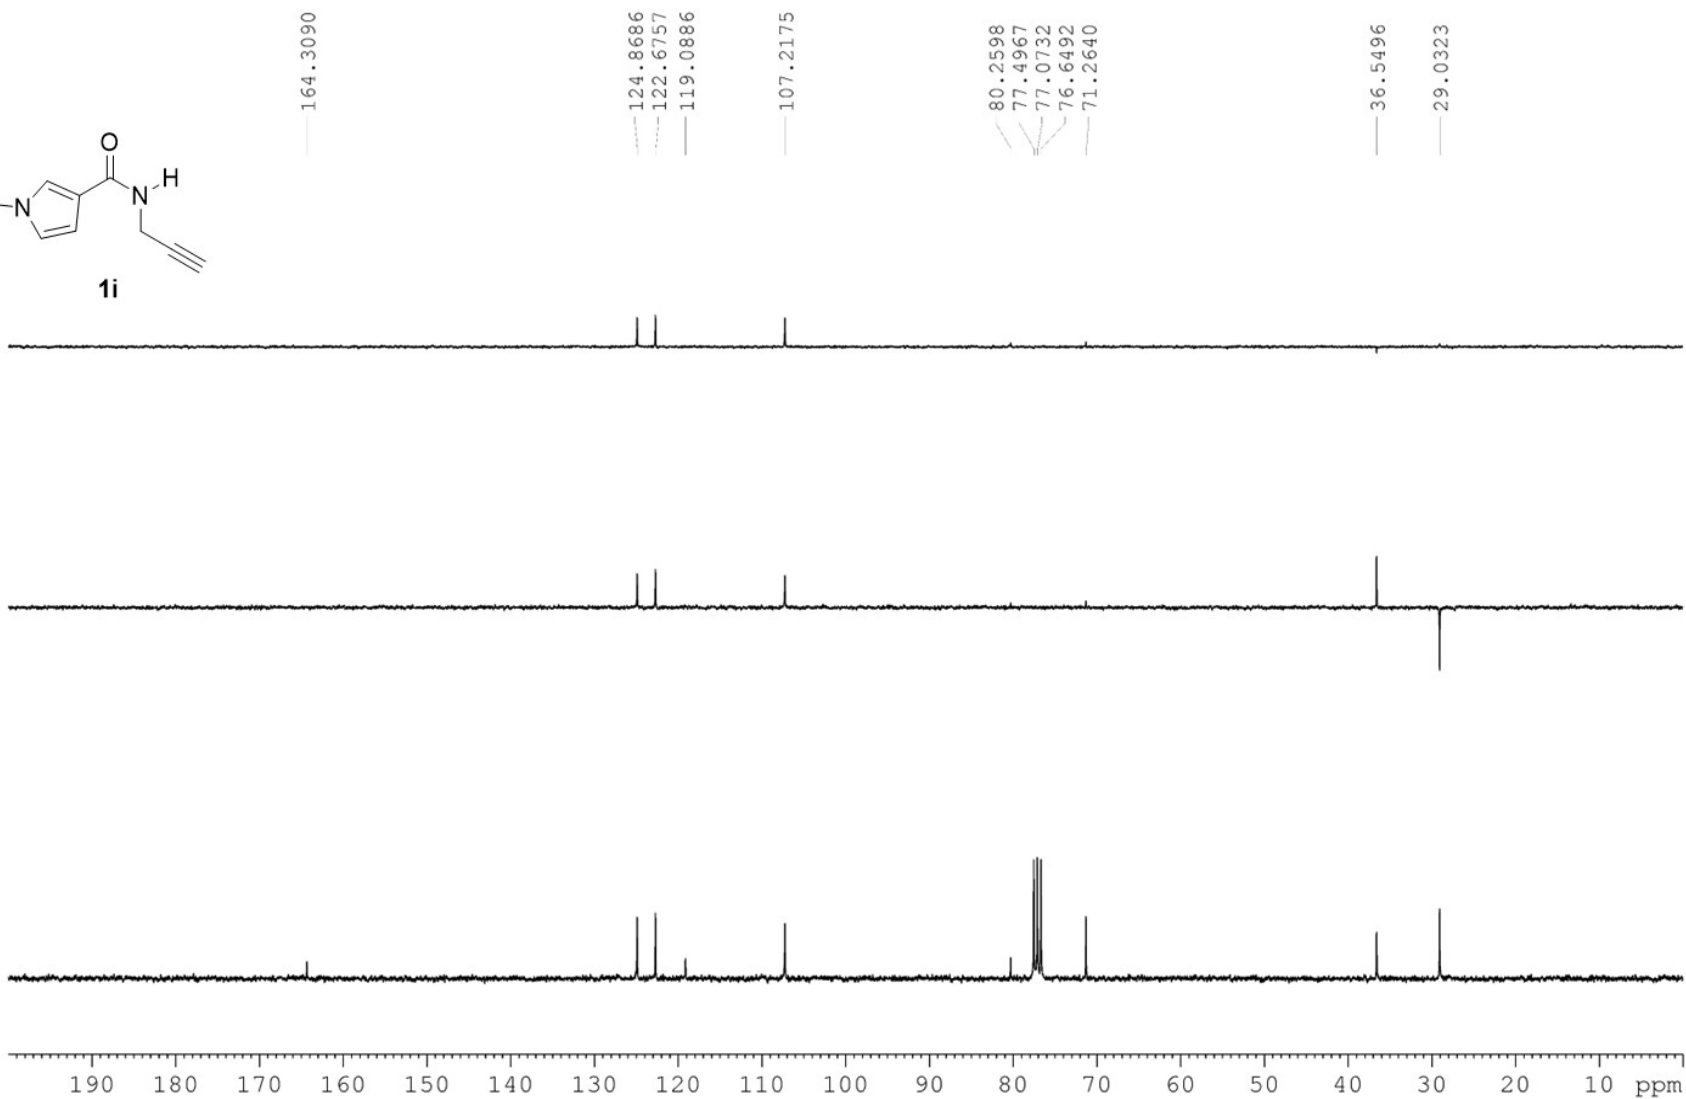

$^{13}\text{C}\{^1\text{H}\}$ -DEPT NMR (75 MHz,  $\text{CDCl}_3$ ) of **1i**

## Elemental Composition Report

Page 1

### Single Mass Analysis

Tolerance = 500.0 PPM / DBE: min = -10.0, max = 100.0

Element prediction: Off

Number of isotope peaks used for i-FIT = 3

Monoisotopic Mass, Even Electron Ions

115 formula(e) evaluated with 28 results within limits (up to 25 closest results for each mass)

Elements Used:

C: 1-100 H: 1-100 N: 1-10 O: 1-10

YTH3165B

251210FJU05 90 (0.888) Cm (88:92-(70:76+116:122))

1: TOF MS ES+  
1.15e+005

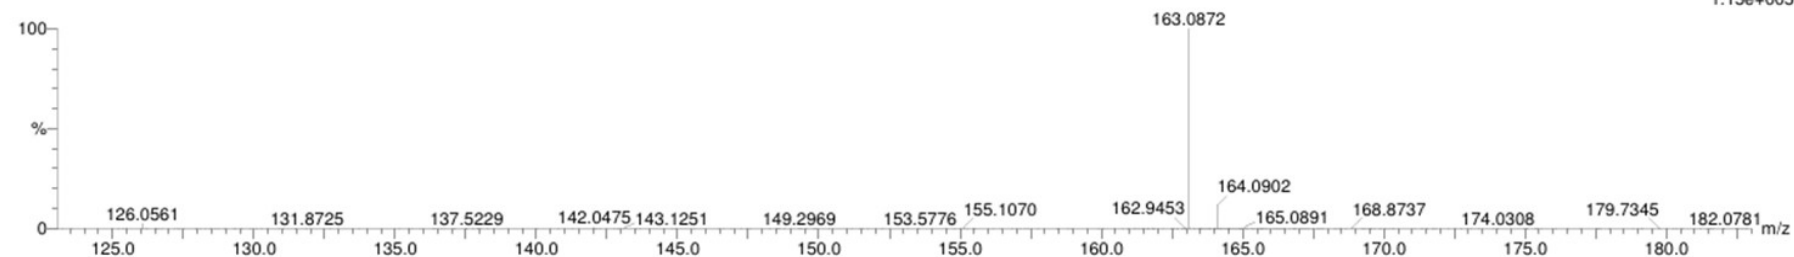

Minimum: 80.00  
Maximum: 100.00

| Mass     | RA     | Calc. Mass | mDa   | PPM    | DBE  | Formula      |
|----------|--------|------------|-------|--------|------|--------------|
| 163.0872 | 100.00 | 163.0871   | 0.1   | 0.6    | 5.5  | C9 H11 N2 O  |
|          |        | 163.0831   | 4.1   | 25.1   | 1.5  | C4 H11 N4 O3 |
|          |        | 163.0930   | -5.8  | -35.6  | -3.5 | C2 H15 N2 O6 |
|          |        | 163.0943   | -7.1  | -43.5  | 1.5  | C3 H11 N6 O2 |
|          |        | 163.0719   | 15.3  | 93.8   | 1.5  | C5 H11 N2 O4 |
|          |        | 163.1042   | -17.0 | -104.2 | -3.5 | C H15 N4 O5  |
|          |        | 163.0692   | 18.0  | 110.4  | 2.5  | C H7 N8 O2   |
|          |        | 163.1056   | -18.4 | -112.8 | 1.5  | C2 H11 N8 O  |
|          |        | 163.1083   | -21.1 | -129.4 | 0.5  | C6 H15 N2 O3 |
|          |        | 163.0620   | 25.2  | 154.5  | 6.5  | C7 H7 N4 O   |
|          |        | 163.0580   | 29.2  | 179.0  | 2.5  | C2 H7 N6 O3  |
|          |        | 163.0566   | 30.6  | 187.6  | -2.5 | C H11 N2 O7  |
|          |        | 163.1195   | -32.3 | -198.1 | 0.5  | C5 H15 N4 O2 |
|          |        | 163.0508   | 36.4  | 223.2  | 6.5  | C8 H7 N2 O2  |
|          |        | 163.0467   | 40.5  | 248.3  | 2.5  | C3 H7 N4 O4  |
|          |        | 163.1294   | -42.2 | -258.8 | -4.5 | C3 H19 N2 O5 |
|          |        | 163.1307   | -43.5 | -266.7 | 0.5  | C4 H15 N6 O  |
|          |        | 163.0368   | 50.4  | 309.0  | 7.5  | C5 H3 N6 O   |
|          |        | 163.0355   | 51.7  | 317.0  | 2.5  | C4 H7 N2 O5  |
|          |        | 163.1406   | -53.4 | -327.4 | -4.5 | C2 H19 N4 O4 |
|          |        | 163.1447   | -57.5 | -352.6 | -0.5 | C7 H19 N2 O2 |
|          |        | 163.0256   | 61.6  | 377.7  | 7.5  | C6 H3 N4 O2  |
|          |        | 163.1519   | -64.7 | -396.7 | -4.5 | C H19 N6 O3  |
|          |        | 163.0216   | 65.6  | 402.2  | 3.5  | C H3 N6 O4   |
|          |        | 163.1559   | -68.7 | -421.2 | -0.5 | C6 H19 N4 O  |

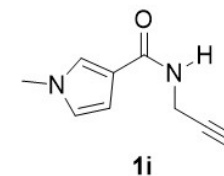

HRMS (ESI<sup>+</sup>) of **1i**

YTH3123-B-20250917

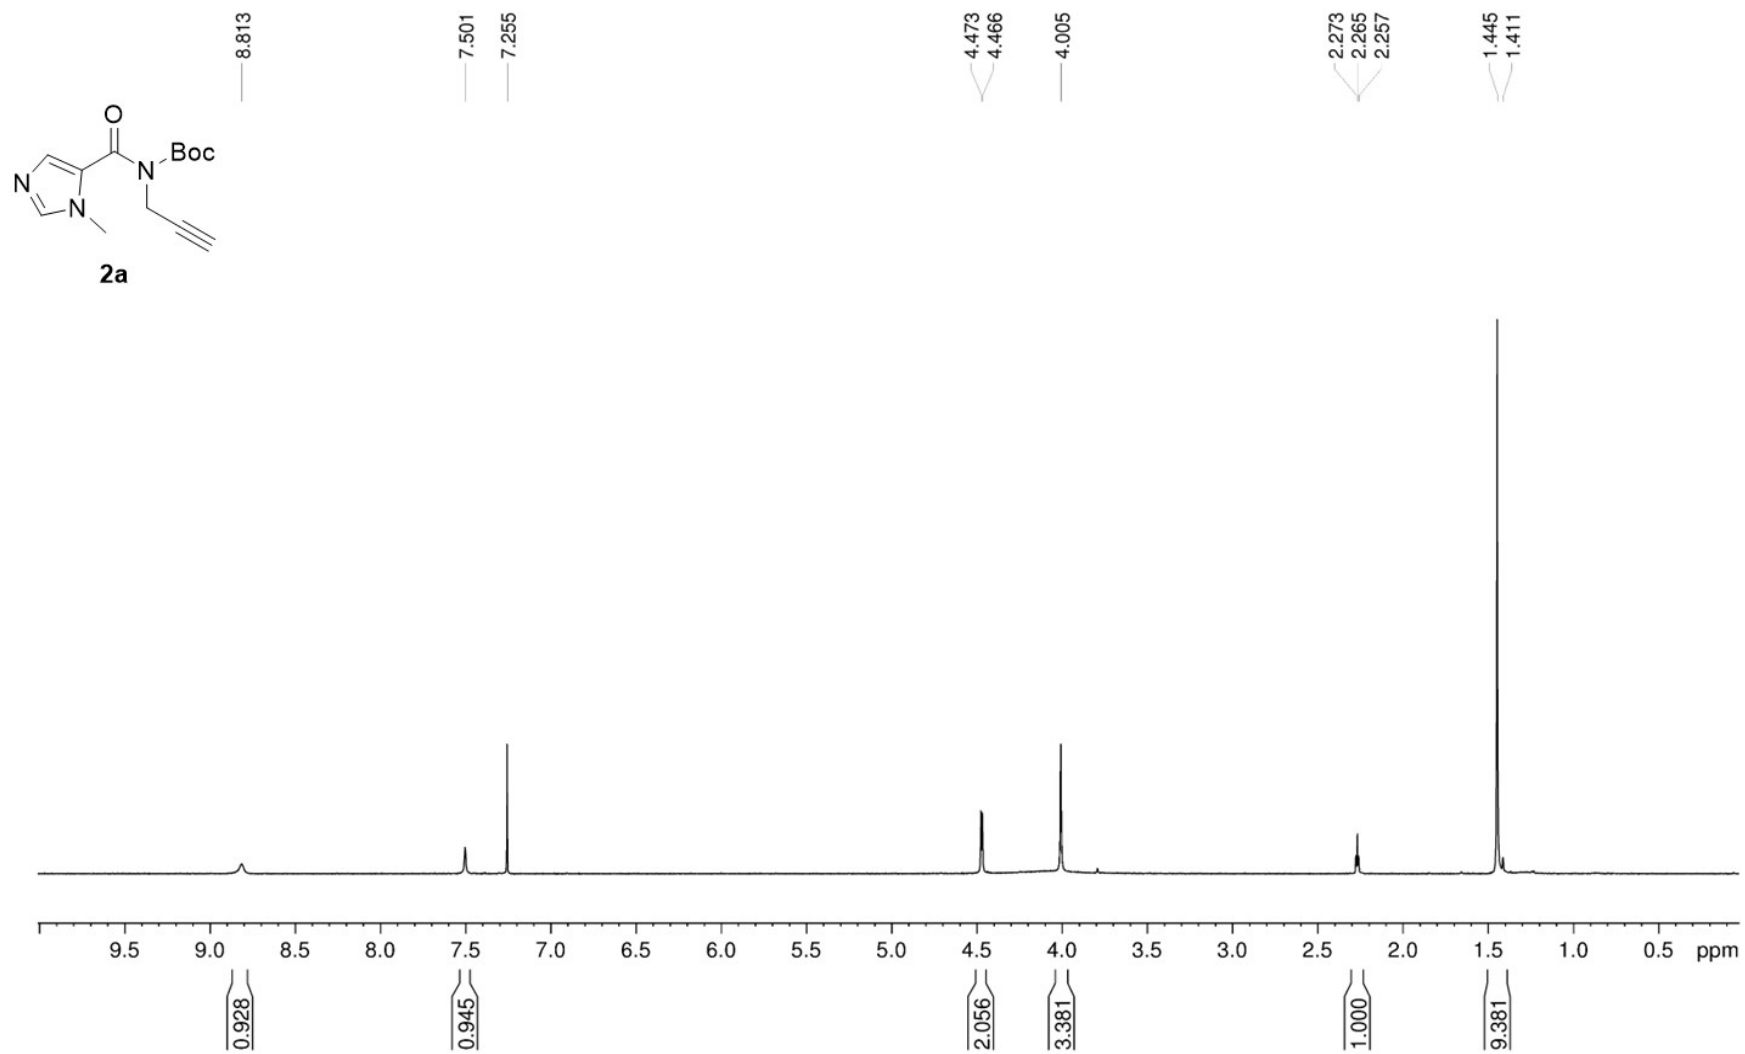

<sup>1</sup>H NMR (300 MHz, CDCl<sub>3</sub>) of **2a**

YTH2201-C-20241122

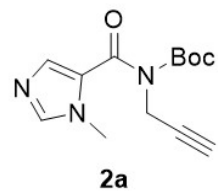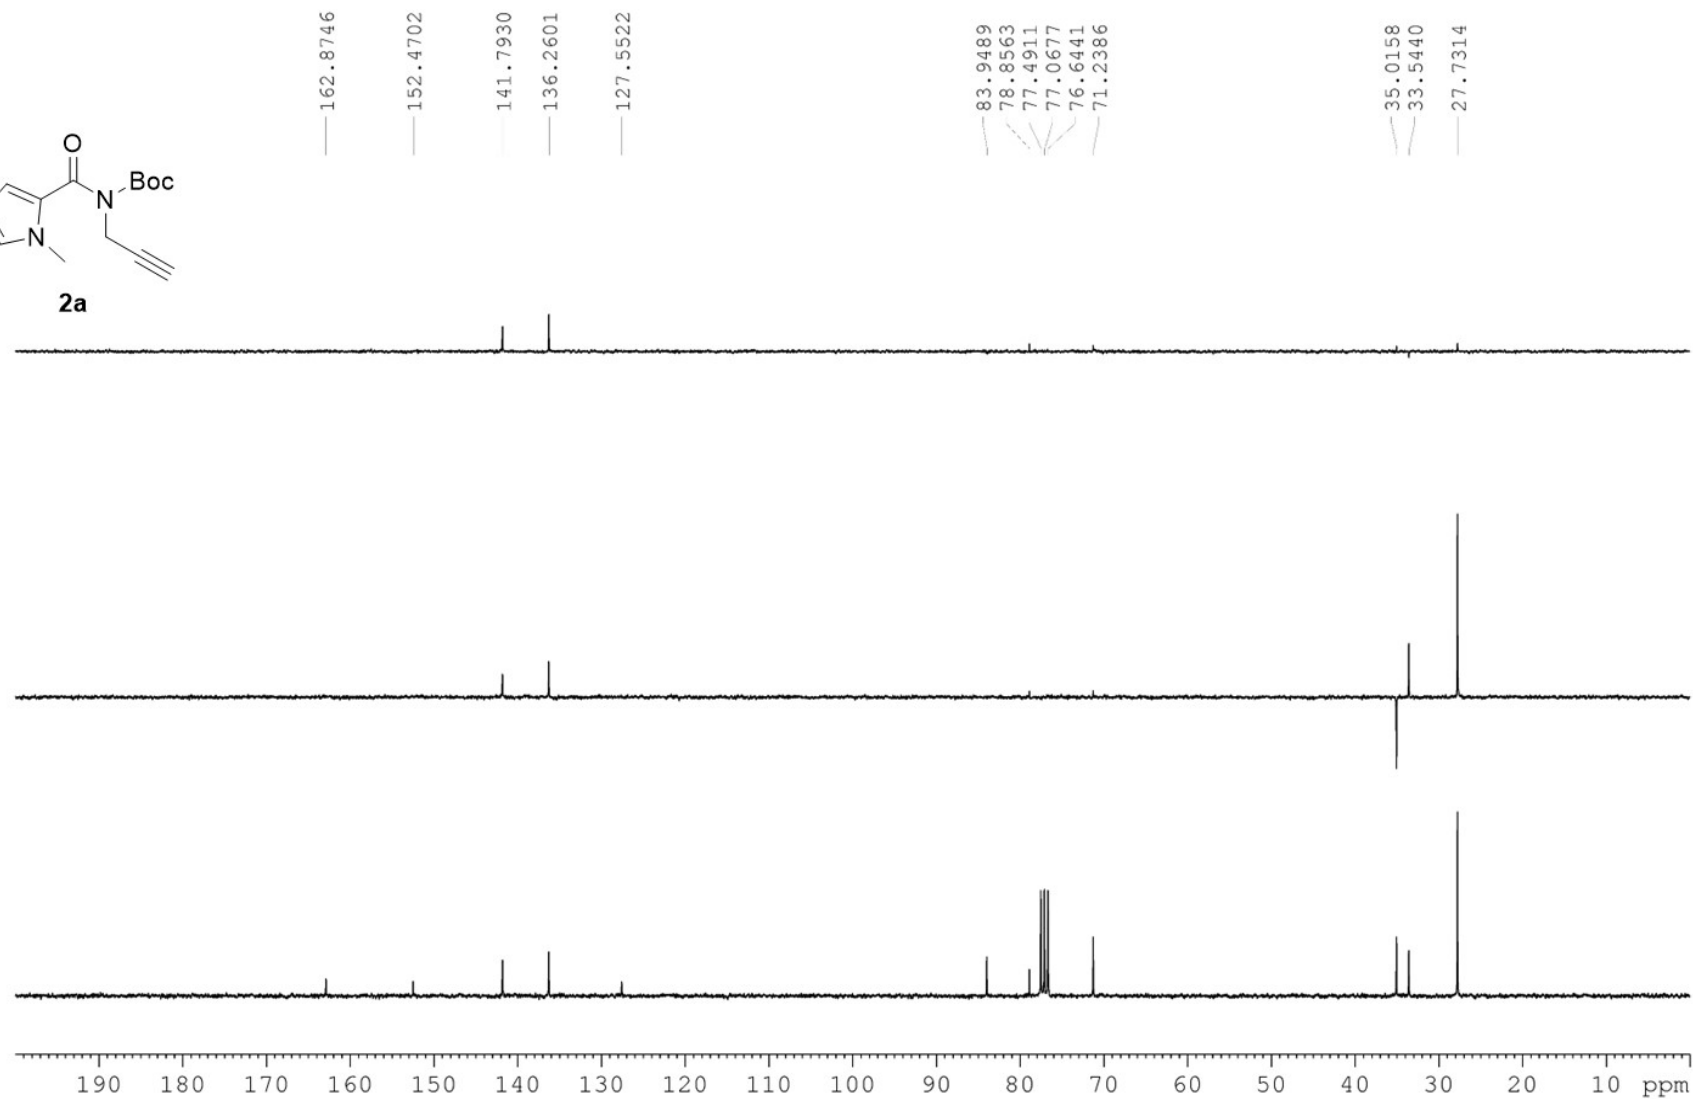

$^{13}\text{C}\{^1\text{H}\}$ -DEPT NMR (75 MHz,  $\text{CDCl}_3$ ) of **2a**

## Elemental Composition Report

### Single Mass Analysis

Tolerance = 500.0 PPM / DBE: min = -10.0, max = 100.0

Element prediction: Off

Number of isotope peaks used for i-FIT = 3

Monoisotopic Mass, Even Electron Ions

354 formula(e) evaluated with 132 results within limits (up to 25 closest results for each mass)

Elements Used:

C: 1-100 H: 1-100 N: 1-10 O: 1-20

YTH3035B

250919FJU20 163 (1.613) Cm (163:171-(149:155+192:198))

1: TOF MS ES+  
2.70e+005

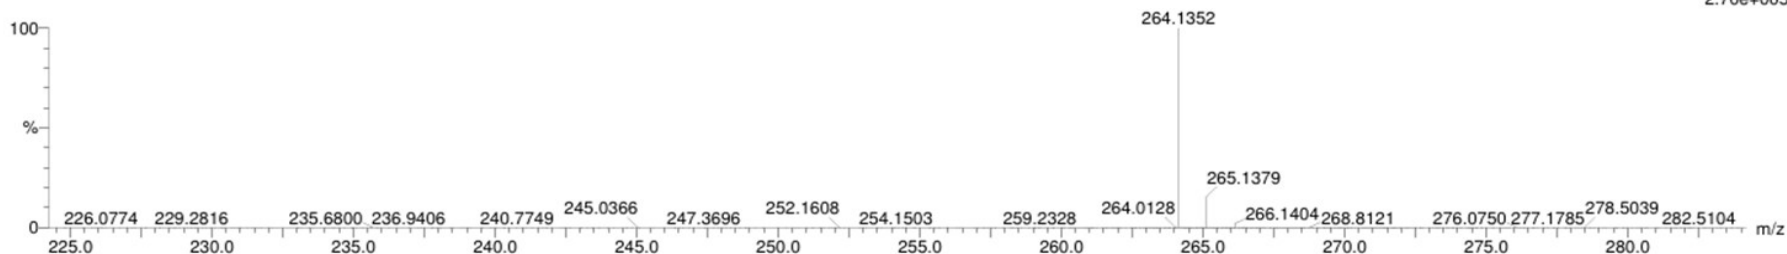

Minimum: 80.00  
Maximum: 100.00

| Mass     | RA     | Calc. Mass | mDa   | PPM   | DBE  | Formula       |
|----------|--------|------------|-------|-------|------|---------------|
| 264.1352 | 100.00 | 264.1348   | 0.4   | 1.5   | 6.5  | C13 H18 N3 O3 |
|          |        | 264.1367   | -1.5  | -5.7  | -6.5 | C H22 N5 O10  |
|          |        | 264.1380   | -2.8  | -10.6 | -1.5 | C2 H18 N9 O6  |
|          |        | 264.1321   | 3.1   | 11.7  | 7.5  | C9 H14 N9 O   |
|          |        | 264.1388   | -3.6  | -13.6 | 10.5 | C18 H18 N O   |
|          |        | 264.1308   | 4.4   | 16.7  | 2.5  | C8 H18 N5 O5  |
|          |        | 264.1407   | -5.5  | -20.8 | -2.5 | C6 H22 N3 O8  |
|          |        | 264.1295   | 5.7   | 21.6  | -2.5 | C7 H22 N O9   |
|          |        | 264.1420   | -6.8  | -25.7 | 2.5  | C7 H18 N7 O4  |
|          |        | 264.1268   | 8.4   | 31.8  | -1.5 | C3 H18 N7 O7  |
|          |        | 264.1447   | -9.5  | -36.0 | 1.5  | C11 H22 N O6  |
|          |        | 264.1254   | 9.8   | 37.1  | -6.5 | C2 H22 N3 O11 |
|          |        | 264.1460   | -10.8 | -40.9 | 6.5  | C12 H18 N5 O2 |
|          |        | 264.1236   | 11.6  | 43.9  | 6.5  | C14 H18 N O4  |
|          |        | 264.1209   | 14.3  | 54.1  | 7.5  | C10 H14 N7 O2 |
|          |        | 264.1506   | -15.4 | -58.3 | -7.5 | C4 H26 N O11  |
|          |        | 264.1196   | 15.6  | 59.1  | 2.5  | C9 H18 N3 O6  |
|          |        | 264.1519   | -16.7 | -63.2 | -2.5 | C5 H22 N5 O7  |
|          |        | 264.1533   | -18.1 | -68.5 | 2.5  | C6 H18 N9 O3  |
|          |        | 264.1169   | 18.3  | 69.3  | 3.5  | C5 H14 N9 O4  |
|          |        | 264.1155   | 19.7  | 74.6  | -1.5 | C4 H18 N5 O8  |
|          |        | 264.1559   | -20.7 | -78.4 | 1.5  | C10 H22 N3 O5 |
|          |        | 264.1142   | 21.0  | 79.5  | -6.5 | C3 H22 N O12  |
|          |        | 264.1137   | 21.5  | 81.4  | 11.5 | C16 H14 N3 O  |
|          |        | 264.1573   | -22.1 | -83.7 | 6.5  | C11 H18 N7 O  |

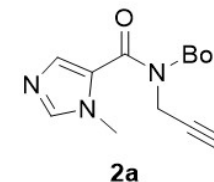

**2a**

HRMS (ESI<sup>+</sup>) of **2a**

YTH2029-B-20230915(C13)

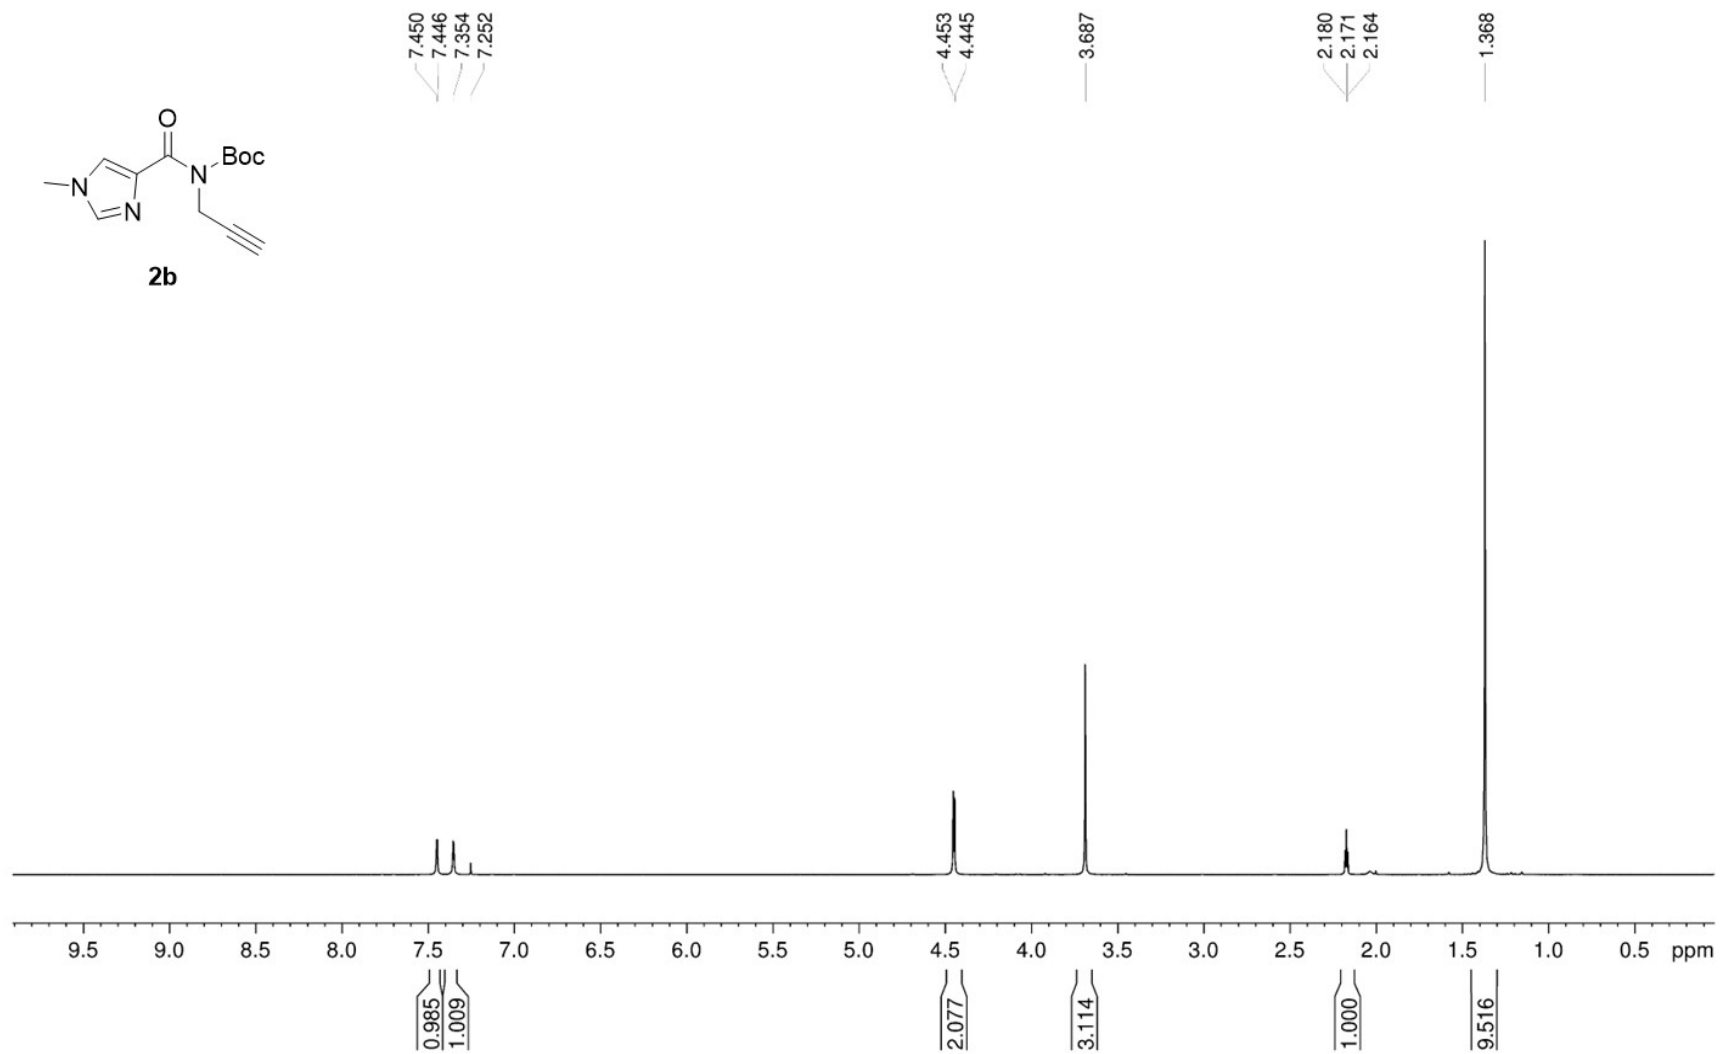

<sup>1</sup>H NMR (300 MHz, CDCl<sub>3</sub>) of **2b**

YTH2029-B-20230915 (C13)

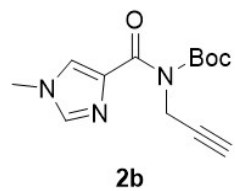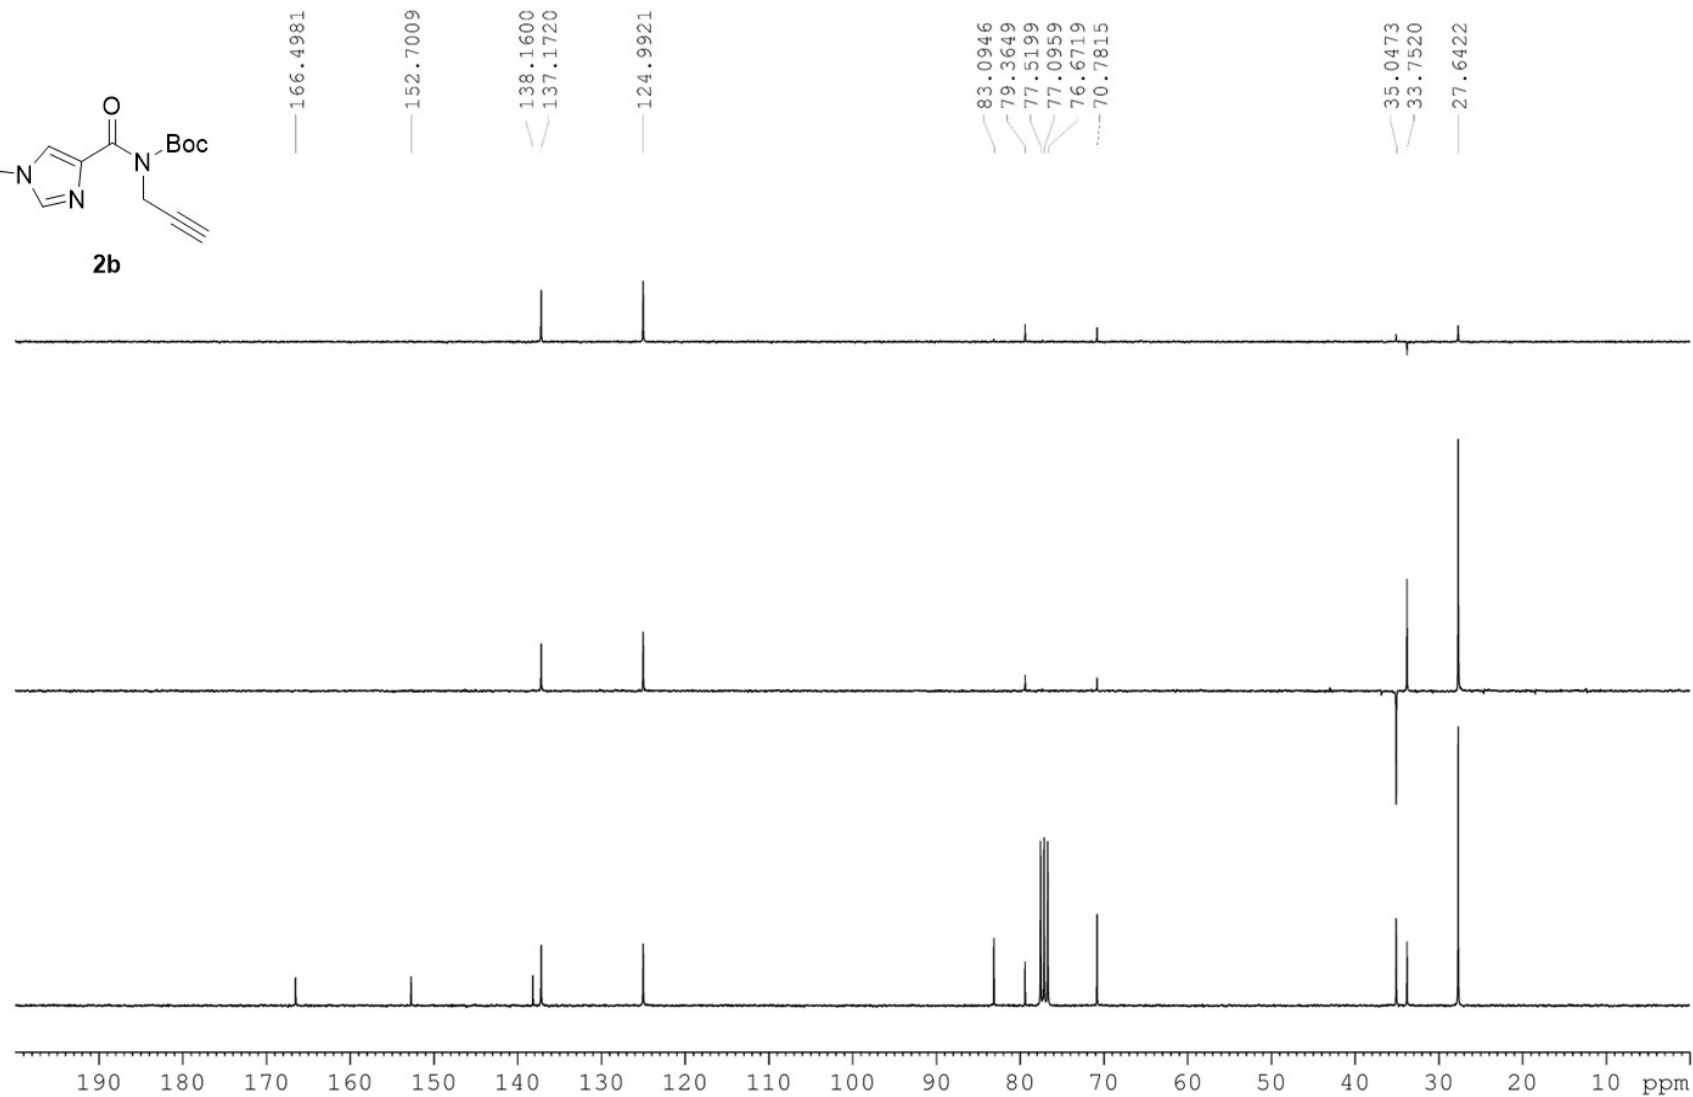

$^{13}\text{C}\{^1\text{H}\}$ -DEPT NMR (75 MHz,  $\text{CDCl}_3$ ) of **2b**

## Elemental Composition Report

### Single Mass Analysis

Tolerance = 500.0 PPM / DBE: min = -10.0, max = 100.0

Element prediction: Off

Number of isotope peaks used for i-FIT = 3

Monoisotopic Mass, Even Electron Ions

697 formula(e) evaluated with 255 results within limits (up to 25 closest results for each mass)

Elements Used:

C: 1-100 H: 1-100 N: 1-10 O: 1-10 Na: 0-1

YTH2029B

250919FJU28-3 179 (1.750) Cm (178:181-(160:166+207:214))

1: TOF MS ES+  
8.98e+003

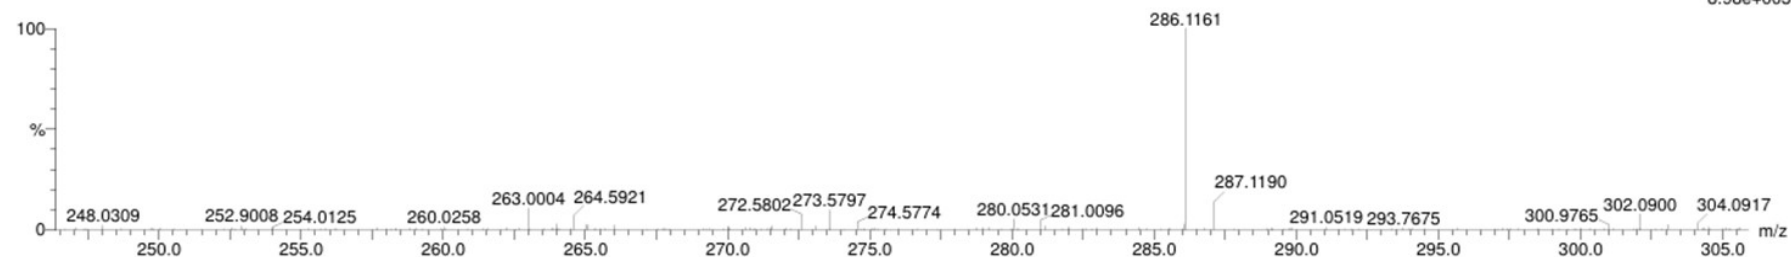

Minimum: 80.00  
Maximum: 100.00

| Mass     | RA     | Calc. Mass | mDa   | PPM   | DBE  | Formula          |
|----------|--------|------------|-------|-------|------|------------------|
| 286.1161 | 100.00 | 286.1168   | -0.7  | -2.4  | 6.5  | C13 H17 N3 O3 Na |
|          |        | 286.1055   | 10.6  | 37.0  | 6.5  | C14 H17 N O4 Na  |
|          |        | 286.1141   | 2.0   | 7.0   | 7.5  | C9 H13 N9 O Na   |
|          |        | 286.1186   | -2.5  | -8.7  | -6.5 | C H21 N5 O10 Na  |
|          |        | 286.1127   | 3.4   | 11.9  | 2.5  | C8 H17 N5 O5 Na  |
|          |        | 286.1240   | -7.9  | -27.6 | 2.5  | C7 H17 N7 O4 Na  |
|          |        | 286.1087   | 7.4   | 25.9  | -1.5 | C3 H17 N7 O7 Na  |
|          |        | 286.1199   | -3.8  | -13.3 | -1.5 | C2 H17 N9 O6 Na  |
|          |        | 286.1226   | -6.5  | -22.7 | -2.5 | C6 H21 N3 O8 Na  |
|          |        | 286.1114   | 4.7   | 16.4  | -2.5 | C7 H21 N O9 Na   |
|          |        | 286.1208   | -4.7  | -16.4 | 10.5 | C18 H17 N O Na   |
|          |        | 286.1280   | -11.9 | -41.6 | 6.5  | C12 H17 N5 O2 Na |
|          |        | 286.1267   | -10.6 | -37.0 | 1.5  | C11 H21 N O6 Na  |
|          |        | 286.1210   | -4.9  | -17.1 | -3.5 | C3 H20 N5 O10    |
|          |        | 286.1111   | 5.0   | 17.5  | 1.5  | C5 H16 N7 O7     |
|          |        | 286.1224   | -6.3  | -22.0 | 1.5  | C4 H16 N9 O6     |
|          |        | 286.1232   | -7.1  | -24.8 | 13.5 | C20 H16 N O      |
|          |        | 286.1079   | 8.2   | 28.7  | 9.5  | C16 H16 N O4     |
|          |        | 286.1192   | -3.1  | -10.8 | 9.5  | C15 H16 N3 O3    |
|          |        | 286.1250   | -8.9  | -31.1 | 0.5  | C8 H20 N3 O8     |
|          |        | 286.1138   | 2.3   | 8.0   | 0.5  | C9 H20 N O9      |
|          |        | 286.1264   | -10.3 | -36.0 | 5.5  | C9 H16 N7 O4     |
|          |        | 286.1151   | 1.0   | 3.5   | 5.5  | C10 H16 N5 O5    |
|          |        | 286.1052   | 10.9  | 38.1  | 10.5 | C12 H12 N7 O2    |
|          |        | 286.1165   | -0.4  | -1.4  | 10.5 | C11 H12 N9 O     |

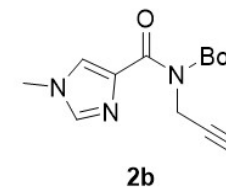

HRMS (ESI<sup>+</sup>) of **2b**

YTH2009-B1-20230714(C13)

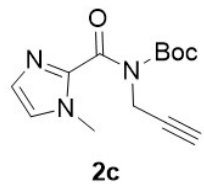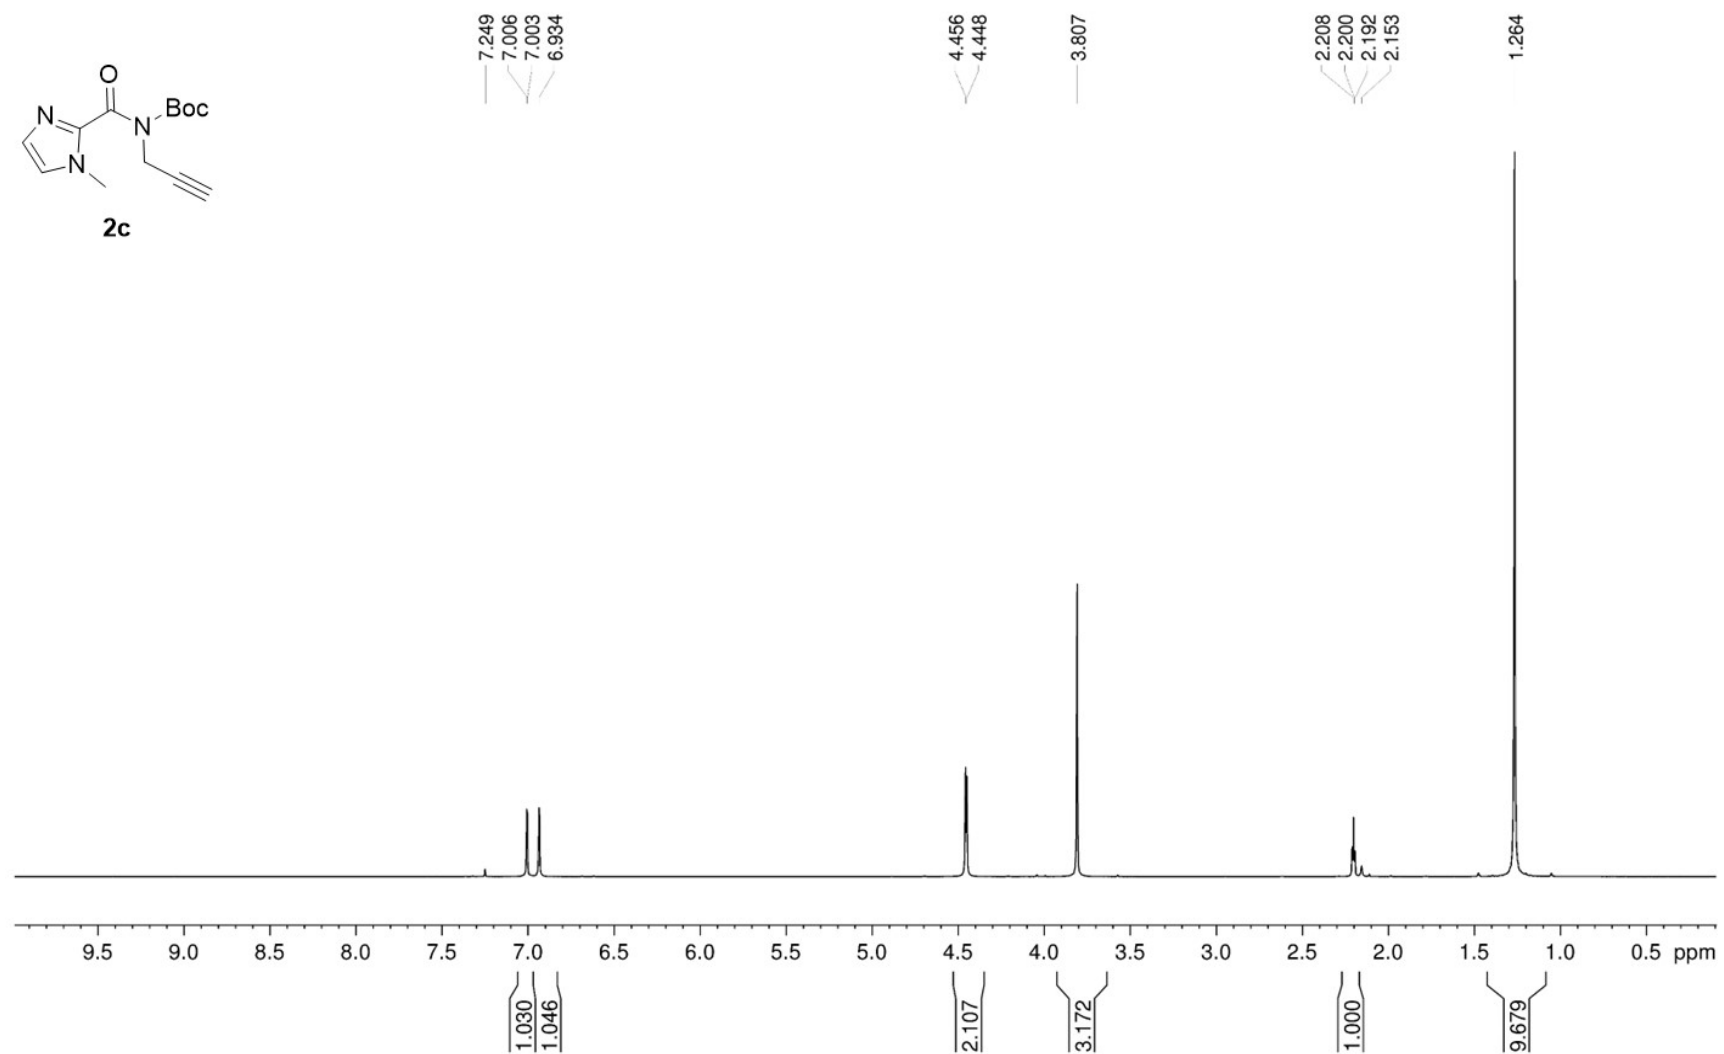

$^1\text{H}$  NMR (300 MHz,  $\text{CDCl}_3$ ) of **2c**

YTH2009-B1-20230714 (C13)

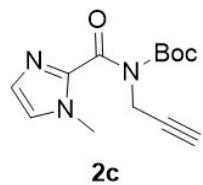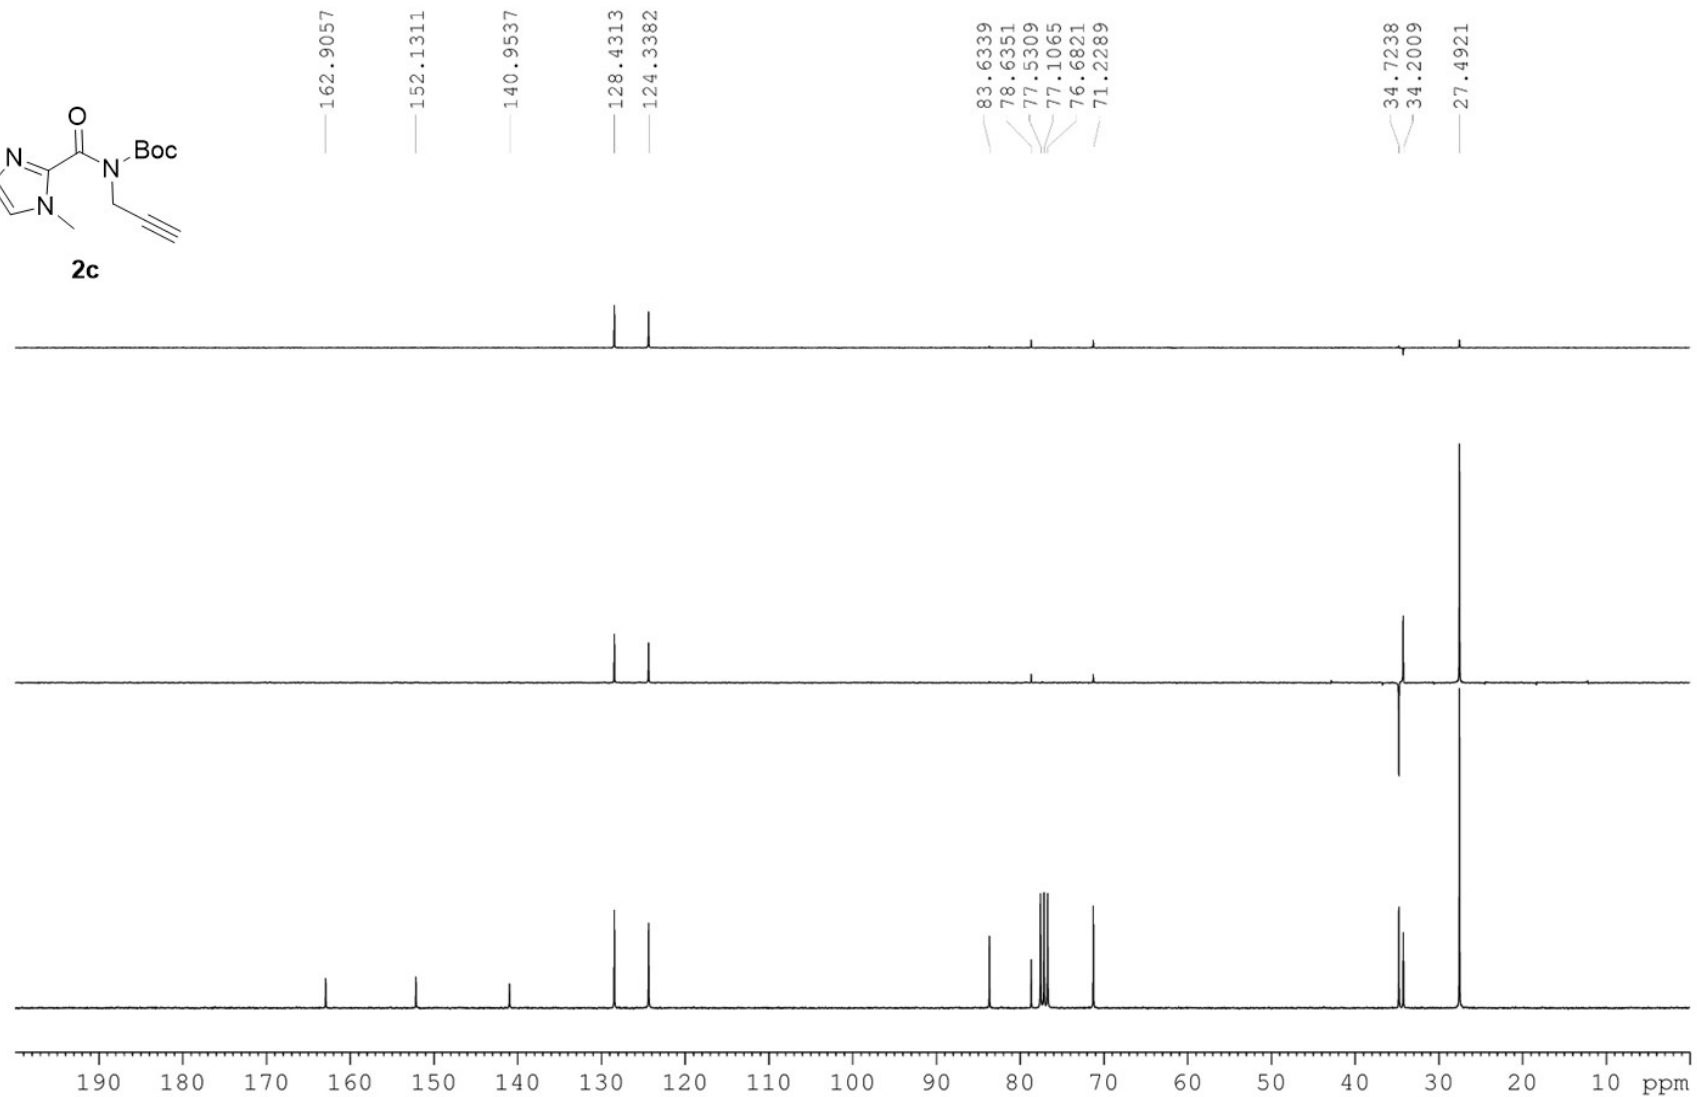

$^{13}\text{C}\{^1\text{H}\}$ -DEPT NMR (75 MHz,  $\text{CDCl}_3$ ) of **2c**

## Elemental Composition Report

### Single Mass Analysis

Tolerance = 500.0 PPM / DBE: min = -10.0, max = 100.0

Element prediction: Off

Number of isotope peaks used for i-FIT = 3

Monoisotopic Mass, Even Electron Ions

323 formula(e) evaluated with 122 results within limits (up to 25 closest results for each mass)

Elements Used:

C: 1-100 H: 1-100 N: 1-10 O: 1-10

YTH3184B

260106FJU04-3 227 (2.221) Cm (225:231-(210:216+253:260))

1: TOF MS ES+  
3.37e+003

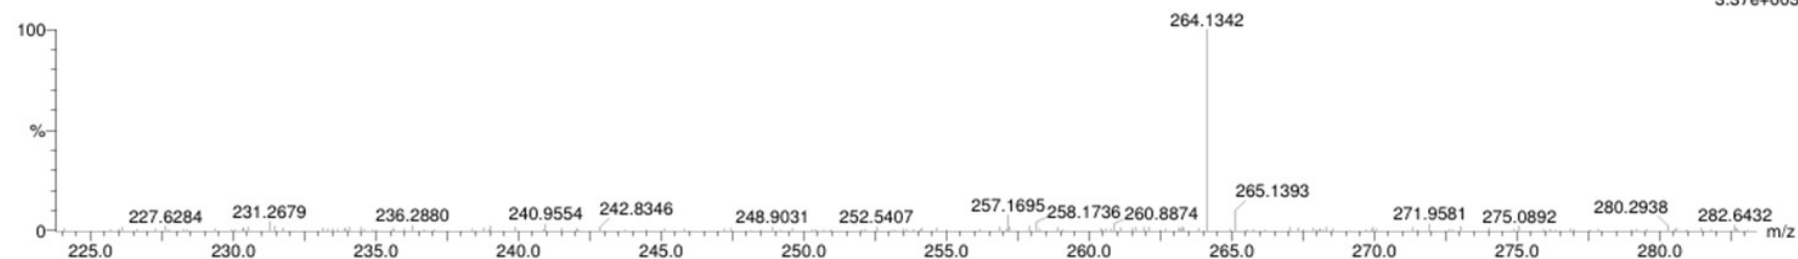

Minimum: 80.00  
Maximum: 100.00

| Mass     | RA     | Calc. Mass | mDa   | PPM   | DBE  | Formula       |
|----------|--------|------------|-------|-------|------|---------------|
| 264.1342 | 100.00 | 264.1348   | -0.6  | -2.3  | 6.5  | C13 H18 N3 O3 |
|          |        | 264.1321   | 2.1   | 8.0   | 7.5  | C9 H14 N9 O   |
|          |        | 264.1367   | -2.5  | -9.5  | -6.5 | C H22 N5 O10  |
|          |        | 264.1308   | 3.4   | 12.9  | 2.5  | C8 H18 N5 O5  |
|          |        | 264.1380   | -3.8  | -14.4 | -1.5 | C2 H18 N9 O6  |
|          |        | 264.1388   | -4.6  | -17.4 | 10.5 | C18 H18 N O   |
|          |        | 264.1295   | 4.7   | 17.8  | -2.5 | C7 H22 N O9   |
|          |        | 264.1407   | -6.5  | -24.6 | -2.5 | C6 H22 N3 O8  |
|          |        | 264.1268   | 7.4   | 28.0  | -1.5 | C3 H18 N7 O7  |
|          |        | 264.1420   | -7.8  | -29.5 | 2.5  | C7 H18 N7 O4  |
|          |        | 264.1447   | -10.5 | -39.8 | 1.5  | C11 H22 N O6  |
|          |        | 264.1236   | 10.6  | 40.1  | 6.5  | C14 H18 N O4  |
|          |        | 264.1460   | -11.8 | -44.7 | 6.5  | C12 H18 N5 O2 |
|          |        | 264.1209   | 13.3  | 50.4  | 7.5  | C10 H14 N7 O2 |
|          |        | 264.1196   | 14.6  | 55.3  | 2.5  | C9 H18 N3 O6  |
|          |        | 264.1169   | 17.3  | 65.5  | 3.5  | C5 H14 N9 O4  |
|          |        | 264.1519   | -17.7 | -67.0 | -2.5 | C5 H22 N5 O7  |
|          |        | 264.1155   | 18.7  | 70.8  | -1.5 | C4 H18 N5 O8  |
|          |        | 264.1533   | -19.1 | -72.3 | 2.5  | C6 H18 N9 O3  |
|          |        | 264.1137   | 20.5  | 77.6  | 11.5 | C16 H14 N3 O  |
|          |        | 264.1559   | -21.7 | -82.2 | 1.5  | C10 H22 N3 O5 |
|          |        | 264.1573   | -23.1 | -87.5 | 6.5  | C11 H18 N7 O  |
|          |        | 264.1097   | 24.5  | 92.8  | 7.5  | C11 H14 N5 O3 |
|          |        | 264.1600   | -25.8 | -97.7 | 5.5  | C15 H22 N O3  |
|          |        | 264.1083   | 25.9  | 98.1  | 2.5  | C10 H18 N O7  |

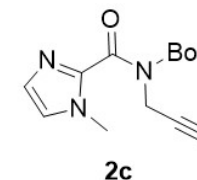

HRMS (ESI<sup>+</sup>) of **2c**

YTH2033-B-20231017(C13)

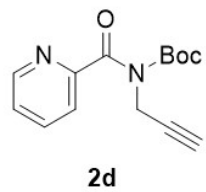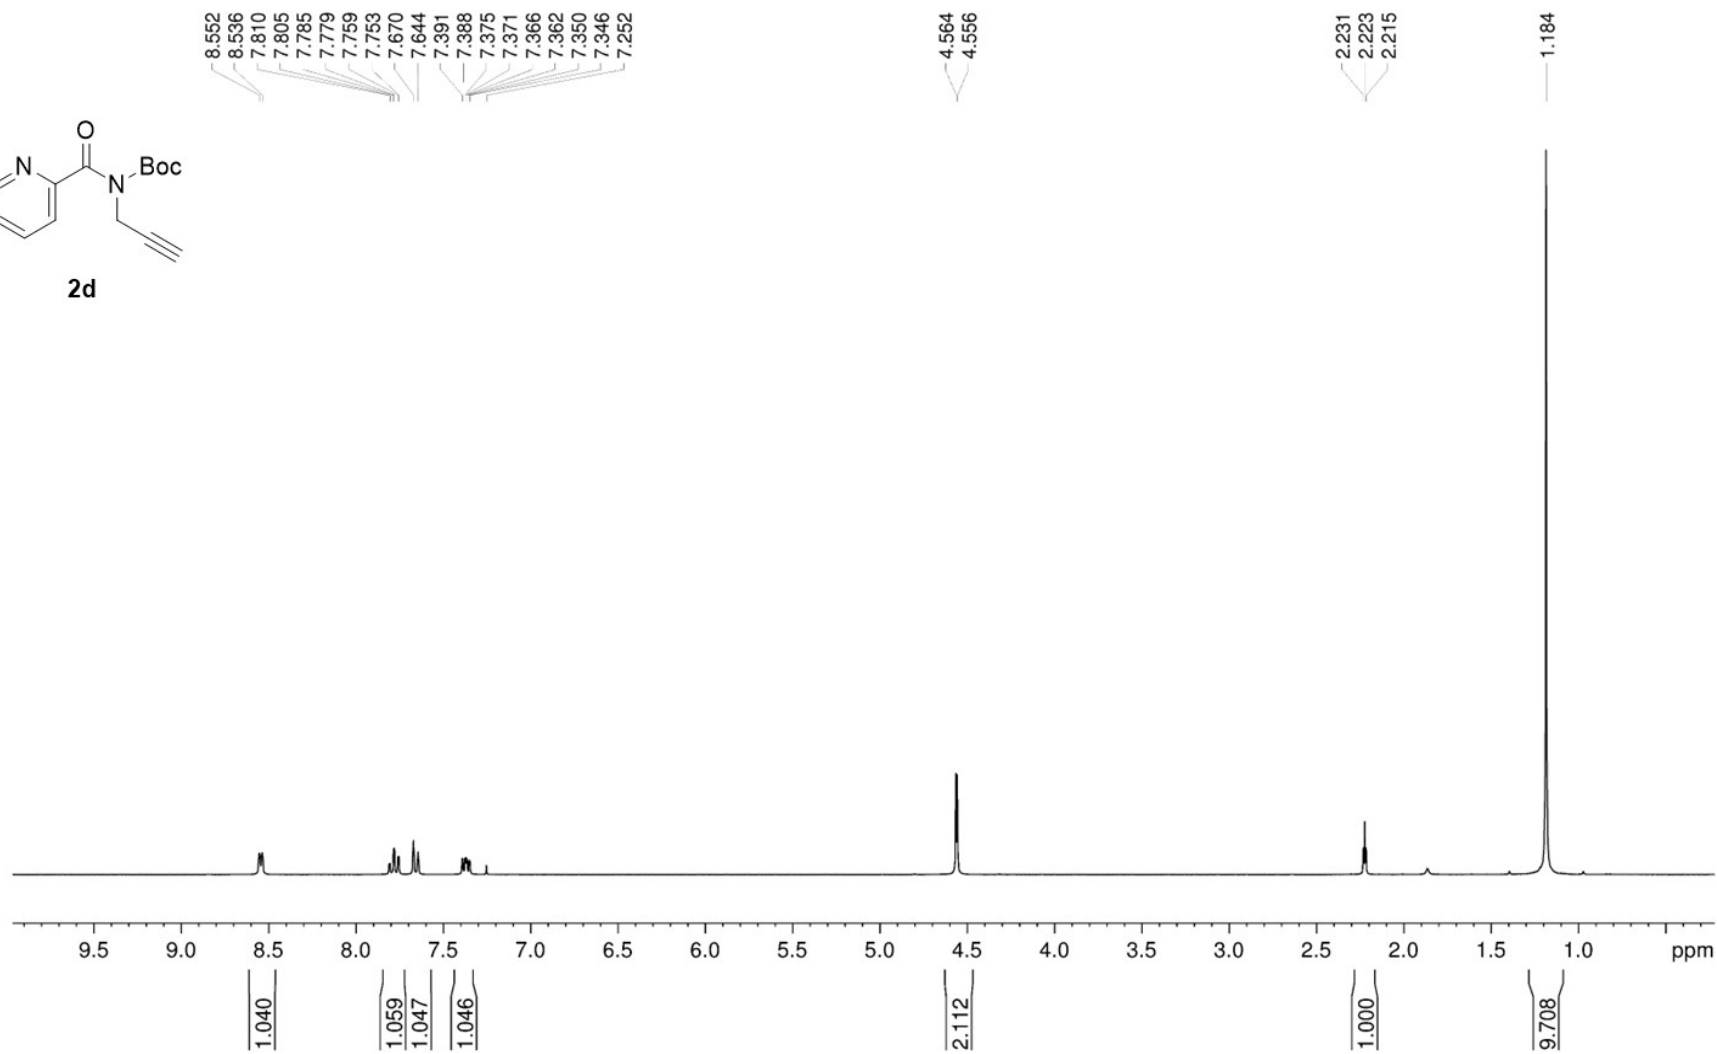

$^1\text{H}$  NMR (300 MHz,  $\text{CDCl}_3$ ) of **2d**

YTH2033-B-20231017 (C13)

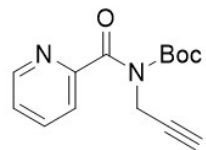

**2d**

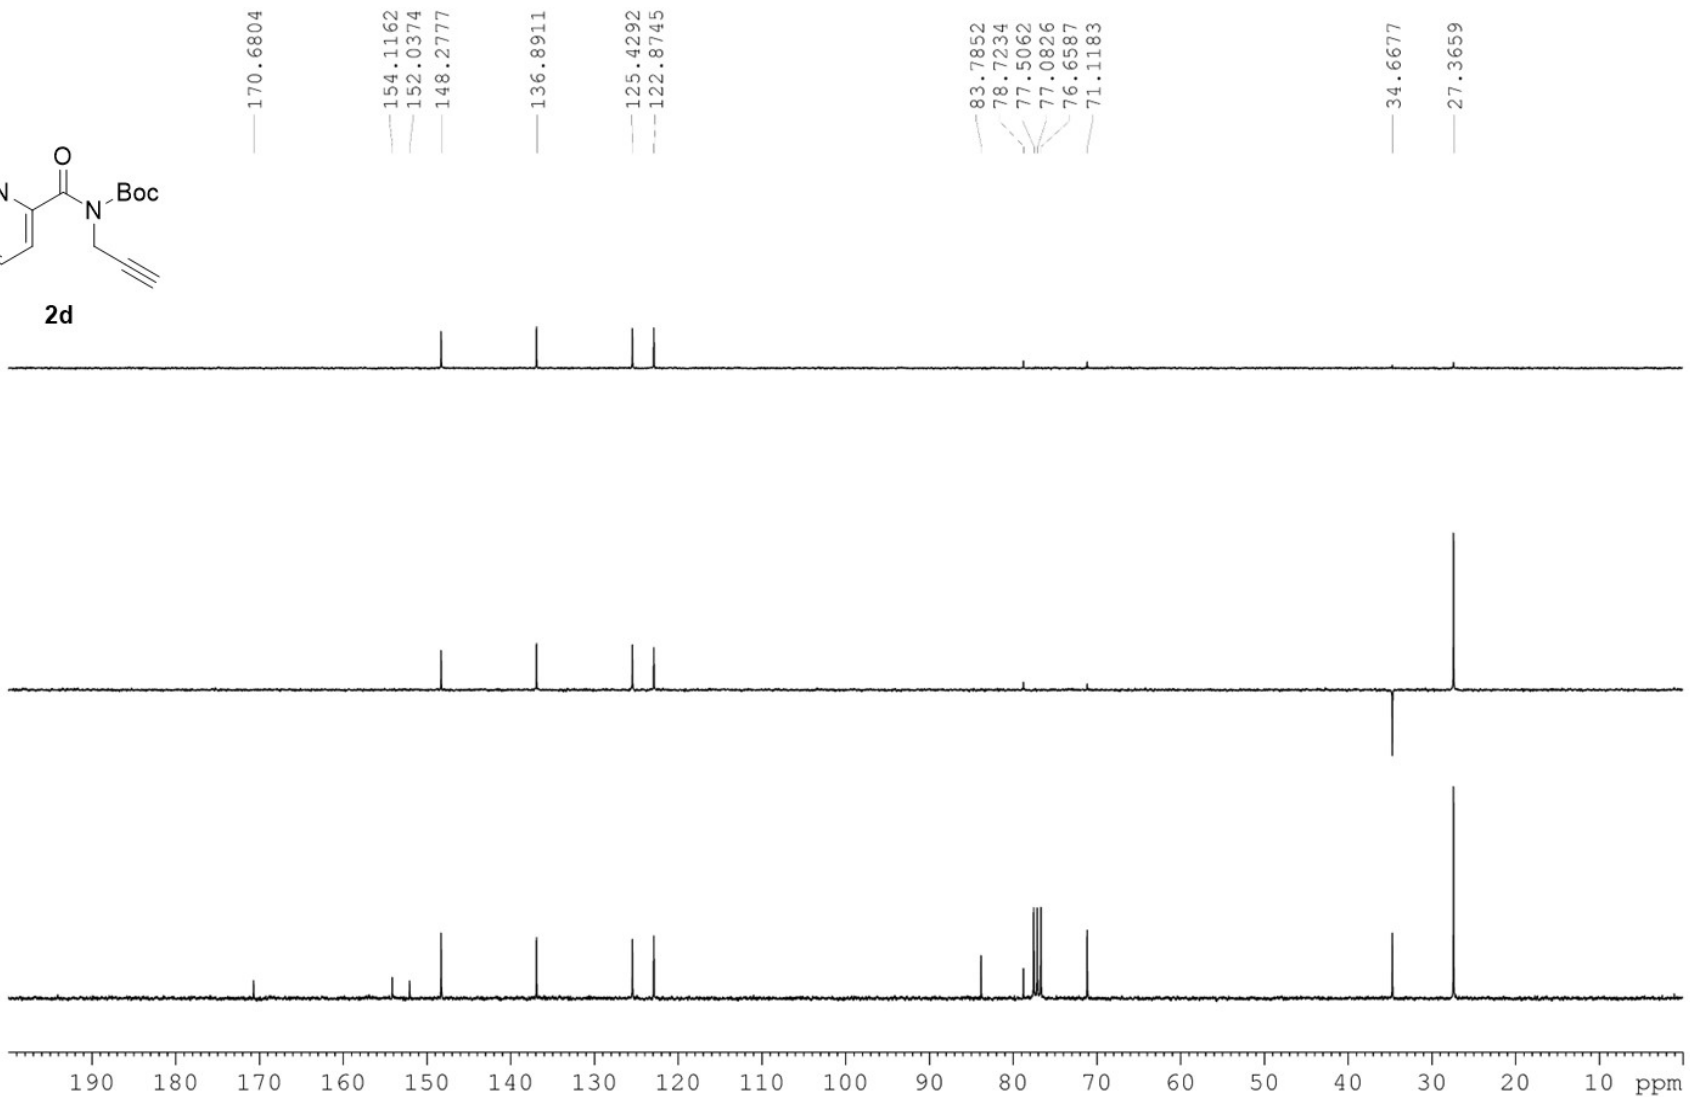

$^{13}\text{C}\{^1\text{H}\}$ -DEPT NMR (75 MHz,  $\text{CDCl}_3$ ) of **2d**

## Elemental Composition Report

### Single Mass Analysis

Tolerance = 500.0 PPM / DBE: min = -10.0, max = 100.0

Element prediction: Off

Number of isotope peaks used for i-FIT = 3

Monoisotopic Mass, Even Electron Ions

683 formula(e) evaluated with 226 results within limits (up to 25 closest results for each mass)

Elements Used:

C: 1-100 H: 1-100 N: 1-10 O: 1-10 Na: 0-1

YTH3181D

260108FJU02-4 253 (2.483) Cm (252:262-(236:245+293:302))

1: TOF MS ES+  
4.29e+003

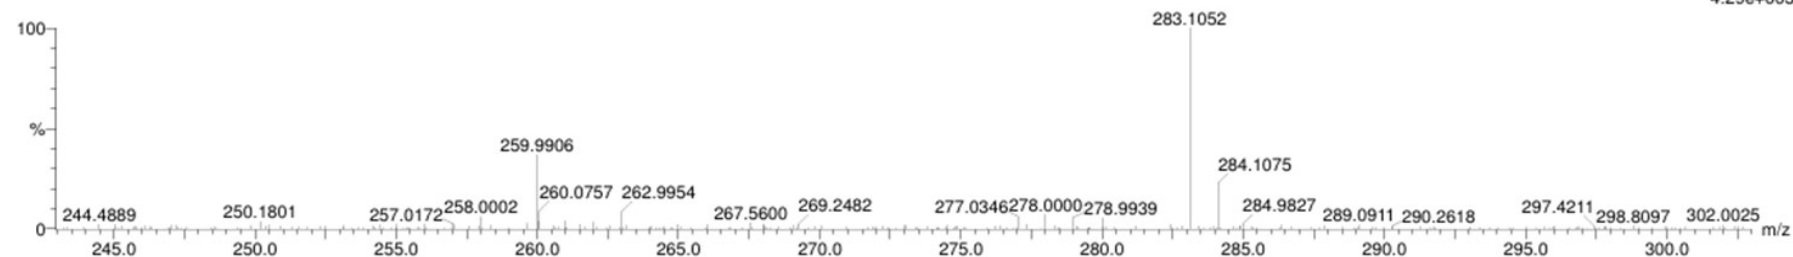

Minimum: 80.00  
Maximum: 100.00

| Mass     | RA     | Calc. Mass | mDa   | PPM   | DBE  | Formula          |
|----------|--------|------------|-------|-------|------|------------------|
| 283.1052 | 100.00 |            |       |       |      |                  |
| 283.1059 |        |            | -0.7  | -2.5  | 7.5  | C14 H16 N2 O3 Na |
| 283.1117 |        |            | -6.5  | -23.0 | -1.5 | C7 H20 N2 O8 Na  |
| 283.1141 |        |            | -8.9  | -31.4 | 1.5  | C9 H19 N2 O8     |
| 283.1083 |        |            | -3.1  | -10.9 | 10.5 | C16 H15 N2 O3    |
| 283.0930 |        |            | 12.2  | 43.1  | 6.5  | C12 H15 N2 O6    |
| 283.1018 |        |            | 3.4   | 12.0  | 3.5  | C9 H16 N4 O5 Na  |
| 283.1077 |        |            | -2.5  | -8.8  | -5.5 | C2 H20 N4 O10 Na |
| 283.1171 |        |            | -11.9 | -42.0 | 7.5  | C13 H16 N4 O2 Na |
| 283.1101 |        |            | -4.9  | -17.3 | -2.5 | C4 H19 N4 O10    |
| 283.1042 |        |            | 1.0   | 3.5   | 6.5  | C11 H15 N4 O5    |
| 283.1195 |        |            | -14.3 | -50.5 | 10.5 | C15 H15 N4 O2    |
| 283.0943 |        |            | 10.9  | 38.5  | 11.5 | C13 H11 N6 O2    |
| 283.1131 |        |            | -7.9  | -27.9 | 3.5  | C8 H16 N6 O4 Na  |
| 283.0978 |        |            | 7.4   | 26.1  | -0.5 | C4 H16 N6 O7 Na  |
| 283.1002 |        |            | 5.0   | 17.7  | 2.5  | C6 H15 N6 O7     |
| 283.1155 |        |            | -10.3 | -36.4 | 6.5  | C10 H15 N6 O4    |
| 283.0919 |        |            | 13.3  | 47.0  | 8.5  | C11 H12 N6 O2 Na |
| 283.1189 |        |            | -13.7 | -48.4 | -5.5 | C H20 N6 O9 Na   |
| 283.0962 |        |            | 9.0   | 31.8  | -1.5 | C H15 N8 O9      |
| 283.1032 |        |            | 2.0   | 7.1   | 8.5  | C10 H12 N8 O Na  |
| 283.1090 |        |            | -3.8  | -13.4 | -0.5 | C3 H16 N8 O6 Na  |
| 283.1056 |        |            | -0.4  | -1.4  | 11.5 | C12 H11 N8 O     |
| 283.1115 |        |            | -6.3  | -22.3 | 2.5  | C5 H15 N8 O6     |
| 283.0992 |        |            | 6.0   | 21.2  | 4.5  | C5 H12 N10 O3 Na |
| 283.1016 |        |            | 3.6   | 12.7  | 7.5  | C7 H11 N10 O3    |

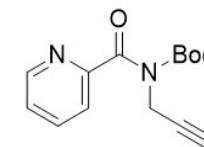

2d

HRMS (ESI<sup>+</sup>) of 2d

YTH2198-B-20241120

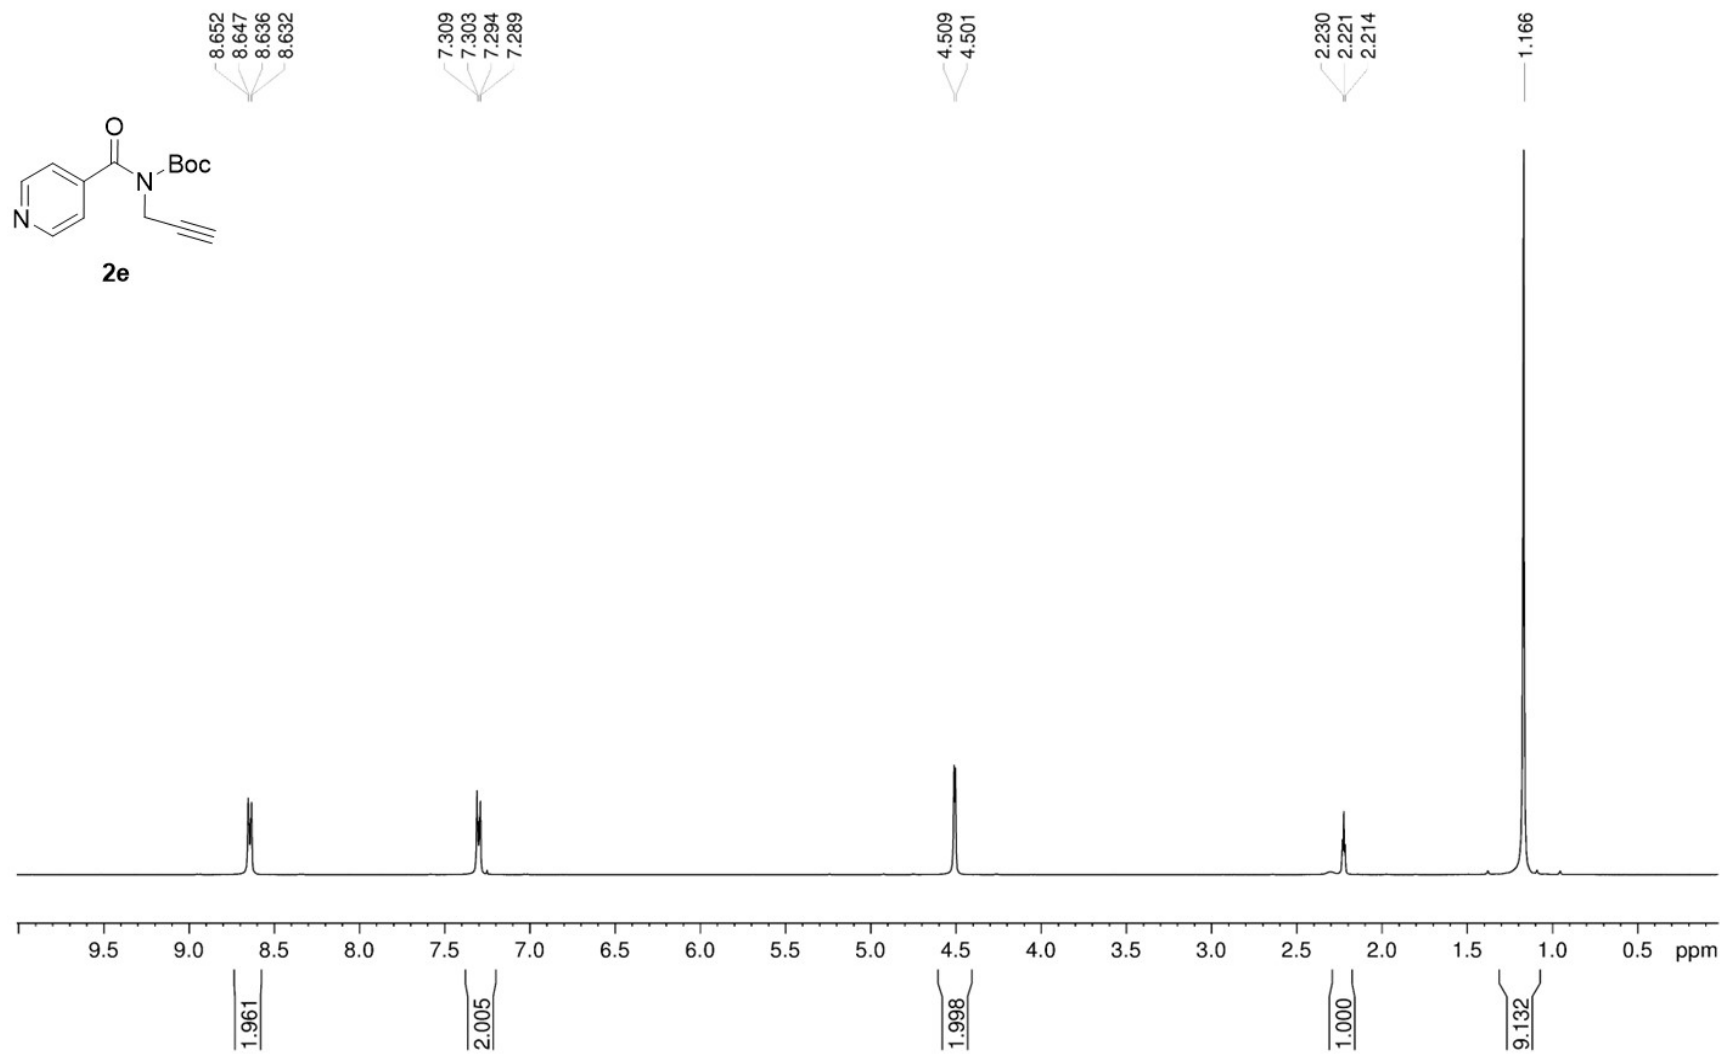

<sup>1</sup>H NMR (300 MHz, CDCl<sub>3</sub>) of **2e**

YTH2198-B-20241120

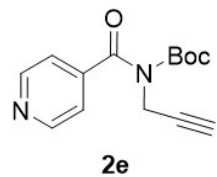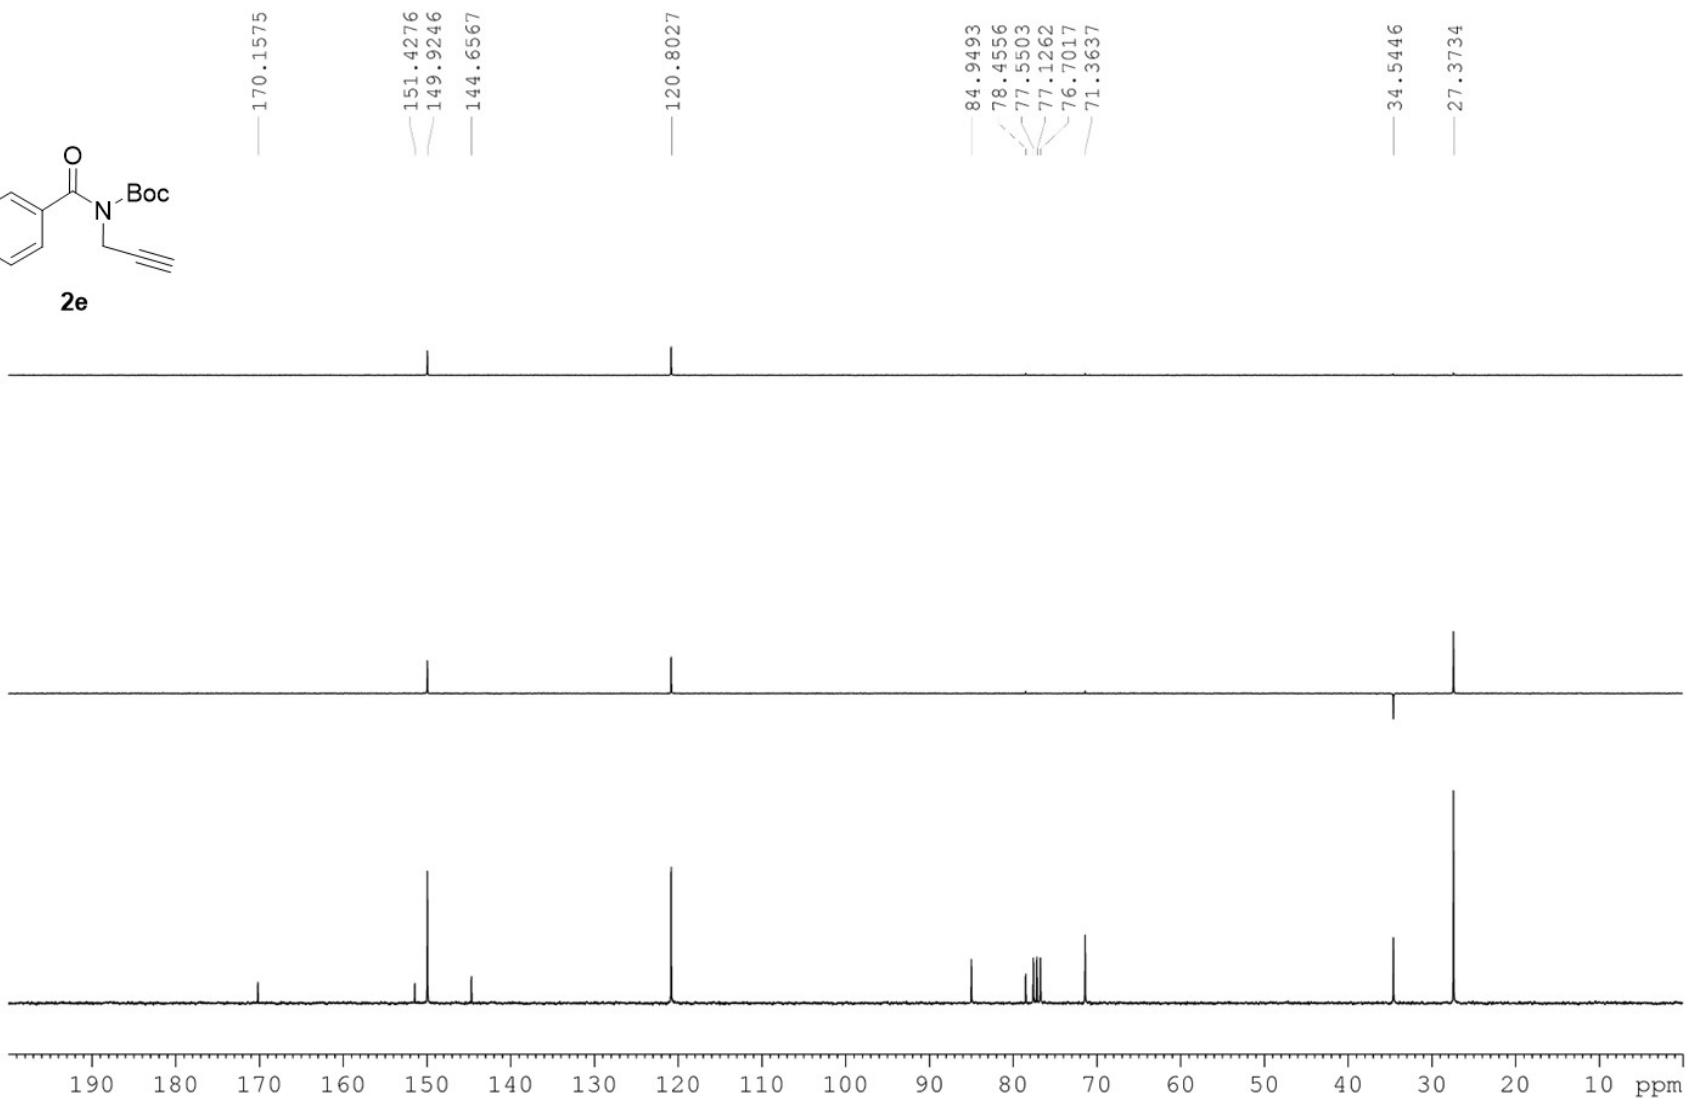

$^{13}\text{C}\{^1\text{H}\}$ -DEPT NMR (75 MHz,  $\text{CDCl}_3$ ) of **2e**

## Elemental Composition Report

Page 1

### Single Mass Analysis

Tolerance = 500.0 PPM / DBE: min = -10.0, max = 100.0

Element prediction: Off

Number of isotope peaks used for i-FIT = 3

Monoisotopic Mass, Even Electron Ions

326 formula(e) evaluated with 113 results within limits (up to 25 closest results for each mass)

Elements Used:

C: 1-100 H: 1-100 N: 1-10 O: 1-10

YTH3032B (YTH2198B)

250924FJU40 235 (2.309) Cm (233:240-(217:224+265:270))

1: TOF MS ES+  
9.89e+004

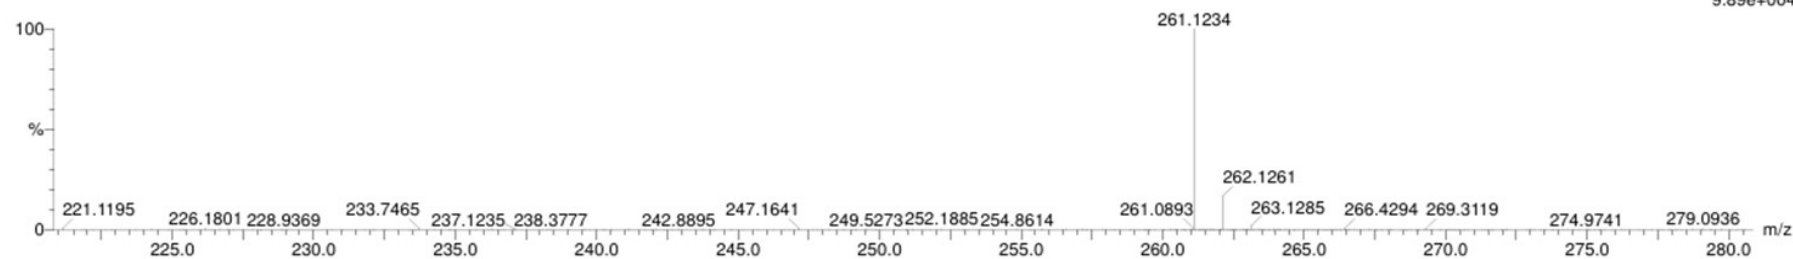

Minimum: 80.00  
Maximum: 100.00

| Mass     | RA     | Calc. Mass | mDa   | PPM    | DBE  | Formula       |
|----------|--------|------------|-------|--------|------|---------------|
| 261.1234 | 100.00 | 261.1239   | -0.5  | -1.9   | 7.5  | C14 H17 N2 O3 |
|          |        | 261.1212   | 2.2   | 8.4    | 8.5  | C10 H13 N8 O  |
|          |        | 261.1258   | -2.4  | -9.2   | -5.5 | C2 H21 N4 O10 |
|          |        | 261.1199   | 3.5   | 13.4   | 3.5  | C9 H17 N4 O5  |
|          |        | 261.1271   | -3.7  | -14.2  | -0.5 | C3 H17 N8 O6  |
|          |        | 261.1172   | 6.2   | 23.7   | 4.5  | C5 H13 N10 O3 |
|          |        | 261.1298   | -6.4  | -24.5  | -1.5 | C7 H21 N2 O8  |
|          |        | 261.1159   | 7.5   | 28.7   | -0.5 | C4 H17 N6 O7  |
|          |        | 261.1311   | -7.7  | -29.5  | 3.5  | C8 H17 N6 O4  |
|          |        | 261.1352   | -11.8 | -45.2  | 7.5  | C13 H17 N4 O2 |
|          |        | 261.1100   | 13.4  | 51.3   | 8.5  | C11 H13 N6 O2 |
|          |        | 261.1370   | -13.6 | -52.1  | -5.5 | C H21 N6 O9   |
|          |        | 261.1087   | 14.7  | 56.3   | 3.5  | C10 H17 N2 O6 |
|          |        | 261.1383   | -14.9 | -57.1  | -0.5 | C2 H17 N10 O5 |
|          |        | 261.1060   | 17.4  | 66.6   | 4.5  | C6 H13 N8 O4  |
|          |        | 261.1410   | -17.6 | -67.4  | -1.5 | C6 H21 N4 O7  |
|          |        | 261.1046   | 18.8  | 72.0   | -0.5 | C5 H17 N4 O8  |
|          |        | 261.1424   | -19.0 | -72.8  | 3.5  | C7 H17 N8 O3  |
|          |        | 261.1028   | 20.6  | 78.9   | 12.5 | C17 H13 N2 O  |
|          |        | 261.1020   | 21.4  | 82.0   | 0.5  | C H13 N10 O6  |
|          |        | 261.1450   | -21.6 | -82.7  | 2.5  | C11 H21 N2 O5 |
|          |        | 261.1464   | -23.0 | -88.1  | 7.5  | C12 H17 N6 O  |
|          |        | 261.0988   | 24.6  | 94.2   | 8.5  | C12 H13 N4 O3 |
|          |        | 261.0961   | 27.3  | 104.5  | 9.5  | C8 H9 N10 O   |
|          |        | 261.1509   | -27.5 | -105.3 | -6.5 | C4 H25 N2 O10 |

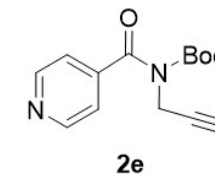

HRMS (ESI<sup>+</sup>) of **2e**

YTH2049-B-20231006(C13)

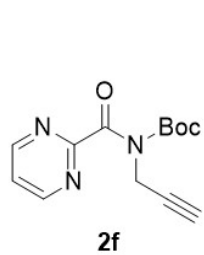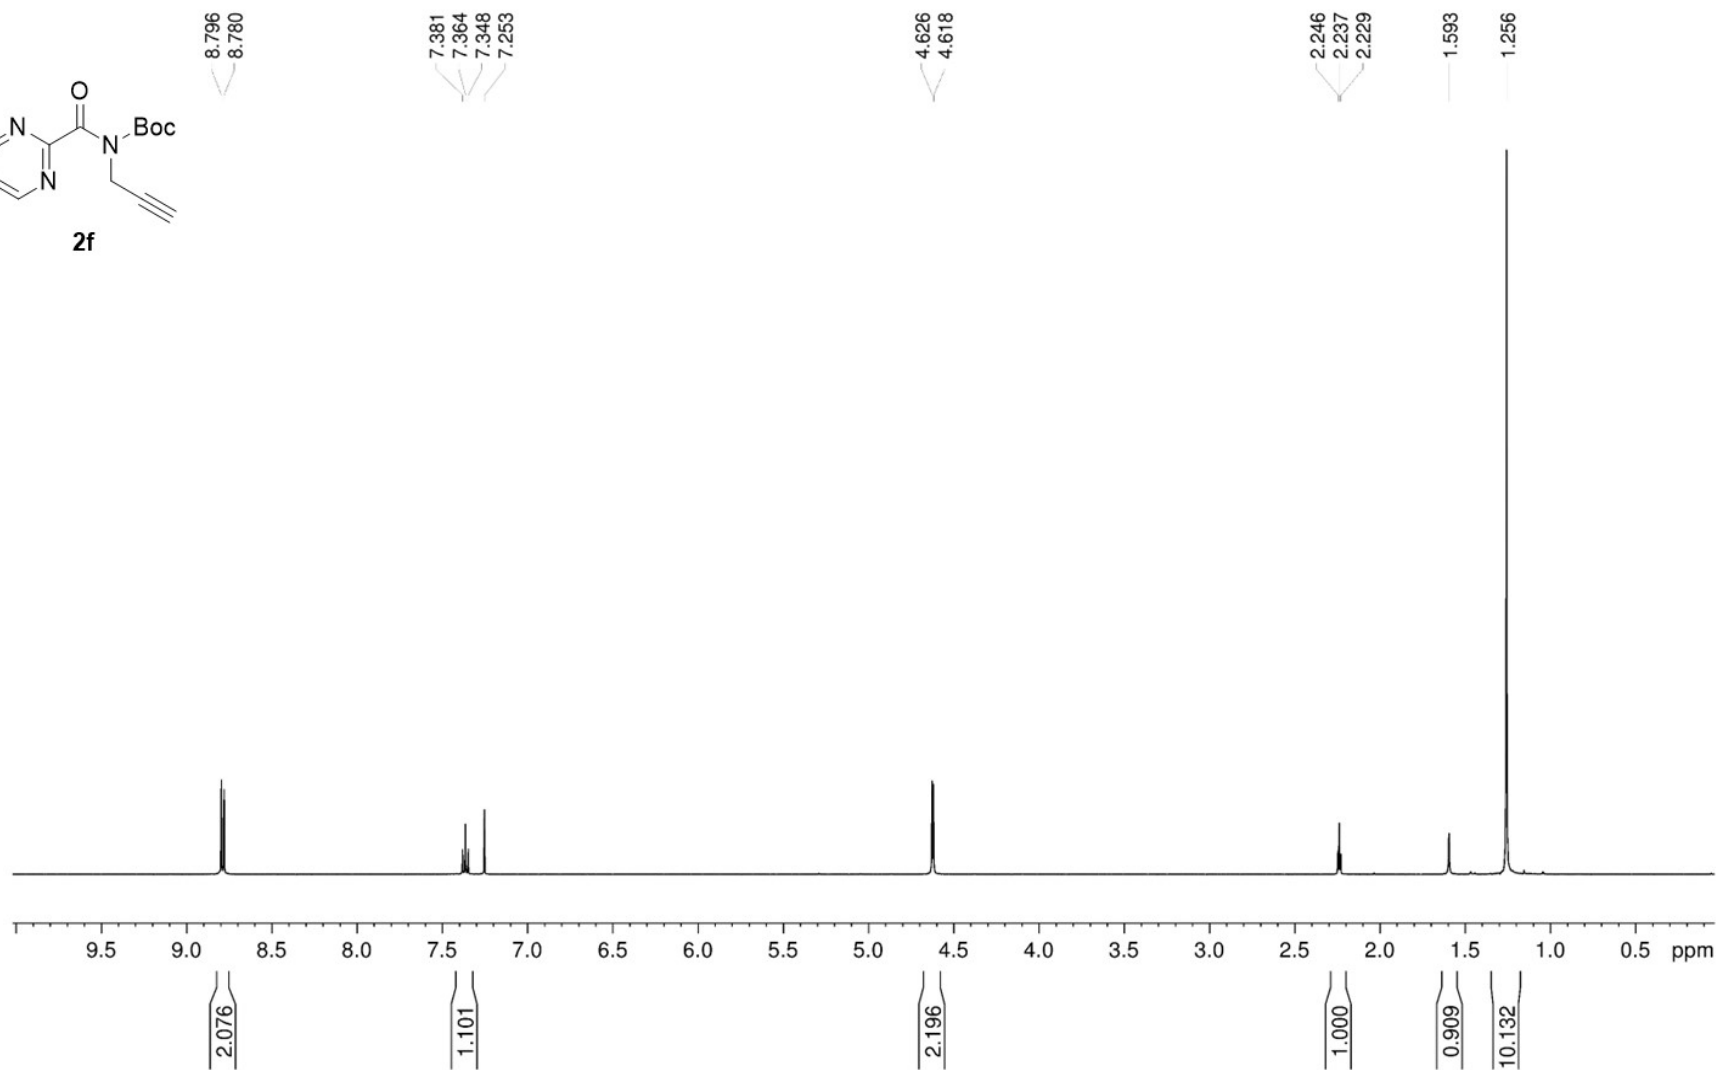

$^1\text{H}$  NMR (300 MHz,  $\text{CDCl}_3$ ) of **2f** (trace of water)

YTH2049-B-20231006 (C13)

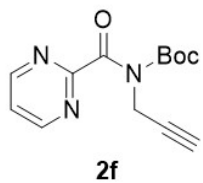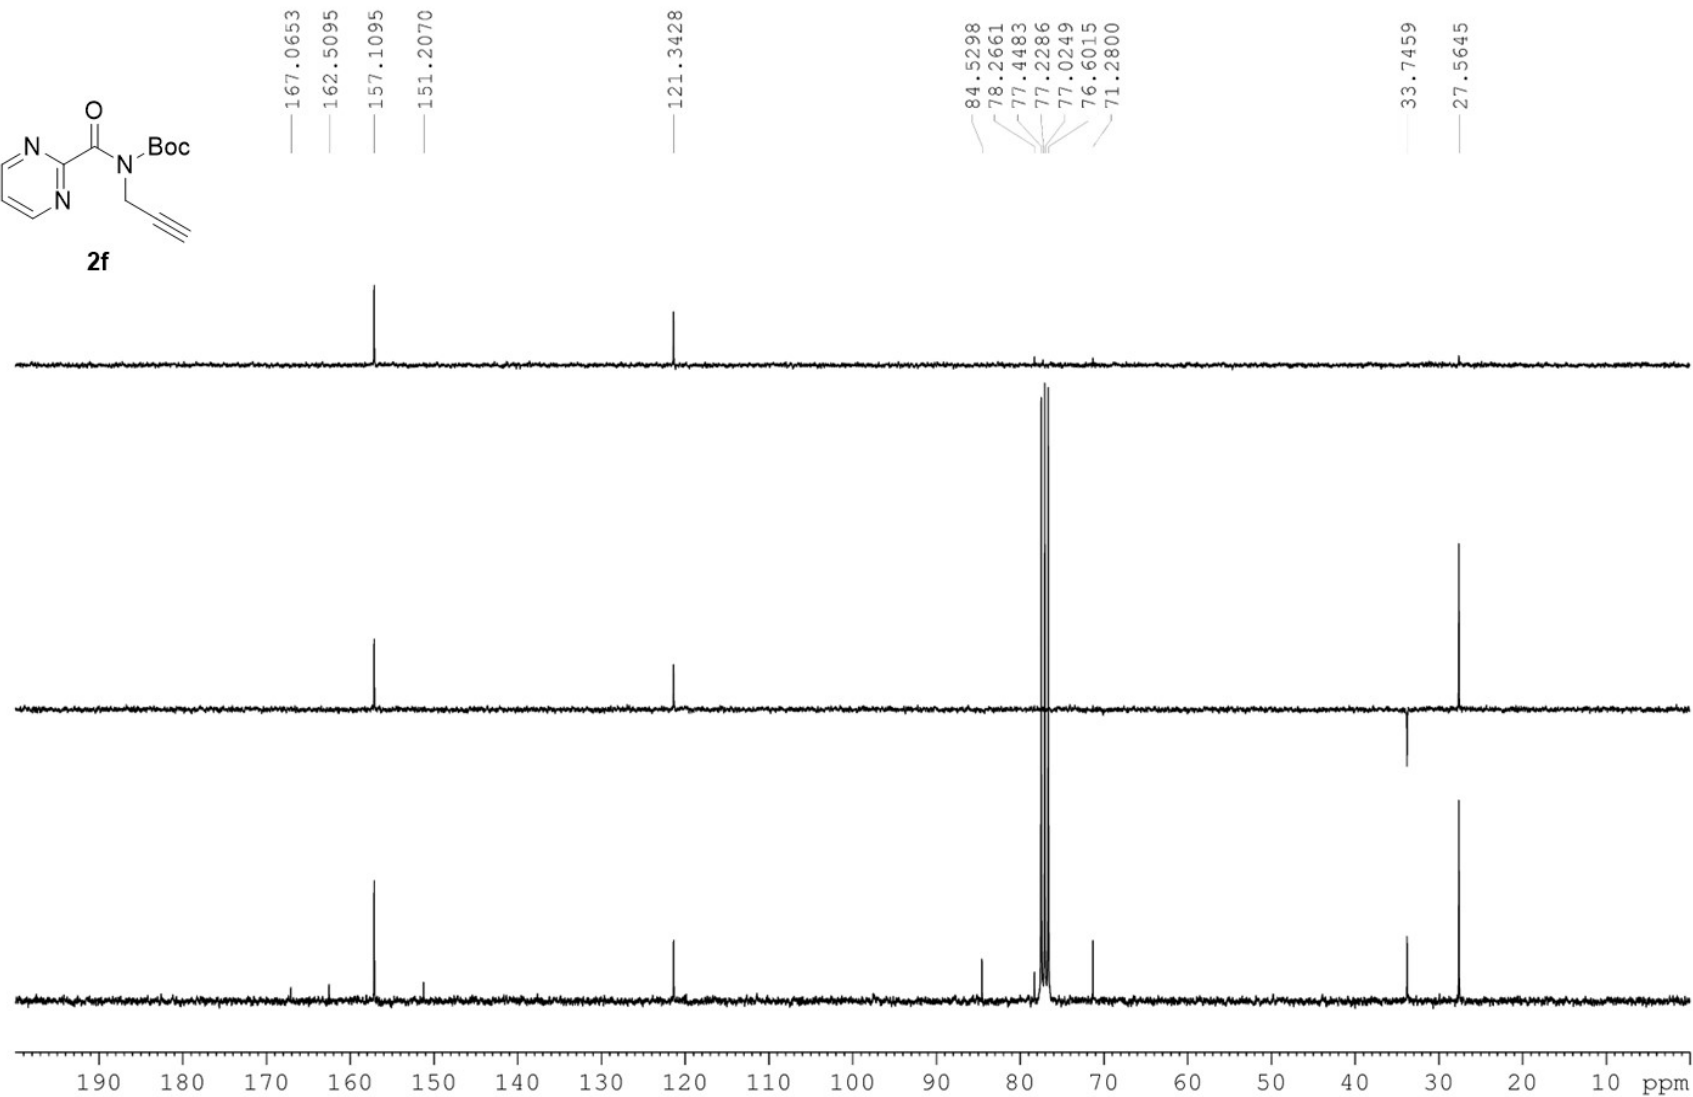

$^{13}\text{C}\{^1\text{H}\}$ -DEPT NMR (75 MHz,  $\text{CDCl}_3$ ) of **2f**

## Elemental Composition Report

Page 1

### Single Mass Analysis

Tolerance = 500.0 PPM / DBE: min = -10.0, max = 100.0

Element prediction: Off

Number of isotope peaks used for i-FIT = 3

Monoisotopic Mass, Even Electron Ions

319 formula(e) evaluated with 114 results within limits (up to 25 closest results for each mass)

Elements Used:

C: 1-100 H: 1-100 N: 1-10 O: 1-10

YTH3180B

260106FJU03 240 (2.352) Cm (240:246-(223:230+268:275))

1: TOF MS ES+  
1.33e+004

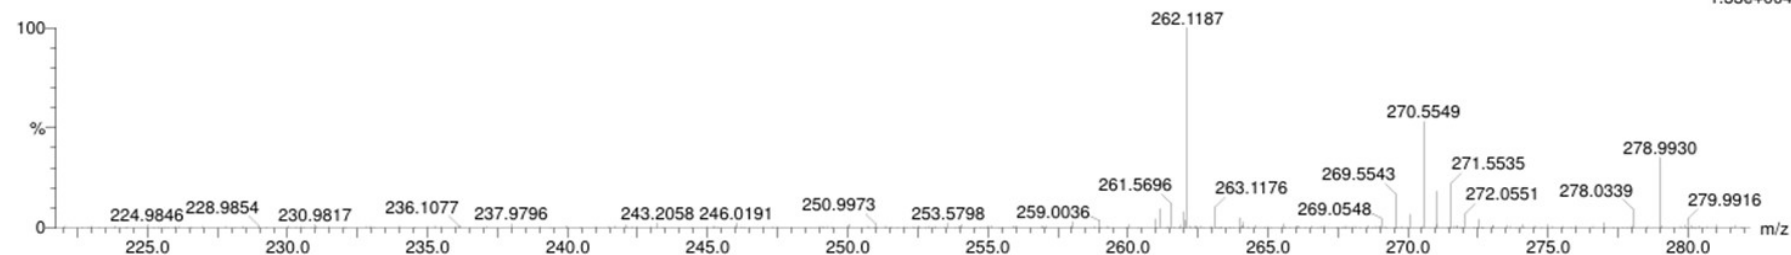

Minimum: 80.00  
Maximum: 100.00

| Mass     | RA     | Calc. Mass | mDa   | PPM   | DBE  | Formula       |
|----------|--------|------------|-------|-------|------|---------------|
| 262.1187 | 100.00 | 262.1192   | -0.5  | -1.9  | 7.5  | C13 H16 N3 O3 |
|          |        | 262.1165   | 2.2   | 8.4   | 8.5  | C9 H12 N9 O   |
|          |        | 262.1210   | -2.3  | -8.8  | -5.5 | C H20 N5 O10  |
|          |        | 262.1151   | 3.6   | 13.7  | 3.5  | C8 H16 N5 O5  |
|          |        | 262.1224   | -3.7  | -14.1 | -0.5 | C2 H16 N9 O6  |
|          |        | 262.1232   | -4.5  | -17.2 | 11.5 | C18 H16 N O   |
|          |        | 262.1138   | 4.9   | 18.7  | -1.5 | C7 H20 N O9   |
|          |        | 262.1250   | -6.3  | -24.0 | -1.5 | C6 H20 N3 O8  |
|          |        | 262.1111   | 7.6   | 29.0  | -0.5 | C3 H16 N7 O7  |
|          |        | 262.1264   | -7.7  | -29.4 | 3.5  | C7 H16 N7 O4  |
|          |        | 262.1291   | -10.4 | -39.7 | 2.5  | C11 H20 N O6  |
|          |        | 262.1079   | 10.8  | 41.2  | 7.5  | C14 H16 N O4  |
|          |        | 262.1304   | -11.7 | -44.6 | 7.5  | C12 H16 N5 O2 |
|          |        | 262.1052   | 13.5  | 51.5  | 8.5  | C10 H12 N7 O2 |
|          |        | 262.1039   | 14.8  | 56.5  | 3.5  | C9 H16 N3 O6  |
|          |        | 262.1012   | 17.5  | 66.8  | 4.5  | C5 H12 N9 O4  |
|          |        | 262.1363   | -17.6 | -67.1 | -1.5 | C5 H20 N5 O7  |
|          |        | 262.0999   | 18.8  | 71.7  | -0.5 | C4 H16 N5 O8  |
|          |        | 262.1376   | -18.9 | -72.1 | 3.5  | C6 H16 N9 O3  |
|          |        | 262.0980   | 20.7  | 79.0  | 12.5 | C16 H12 N3 O  |
|          |        | 262.1403   | -21.6 | -82.4 | 2.5  | C10 H20 N3 O5 |
|          |        | 262.1416   | -22.9 | -87.4 | 7.5  | C11 H16 N7 O  |
|          |        | 262.0940   | 24.7  | 94.2  | 8.5  | C11 H12 N5 O3 |
|          |        | 262.1443   | -25.6 | -97.7 | 6.5  | C15 H20 N O3  |
|          |        | 262.0927   | 26.0  | 99.2  | 3.5  | C10 H16 N O7  |

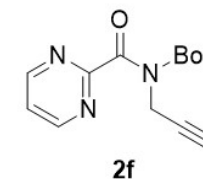

HRMS (ESI<sup>+</sup>) of **2f**

YTH3167-B-20251020

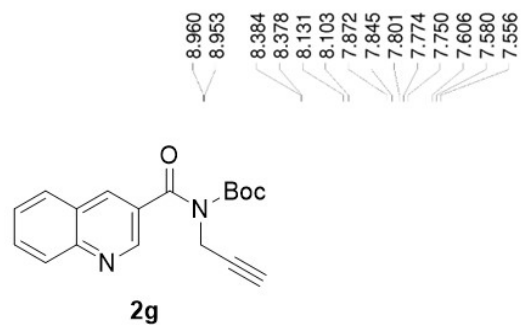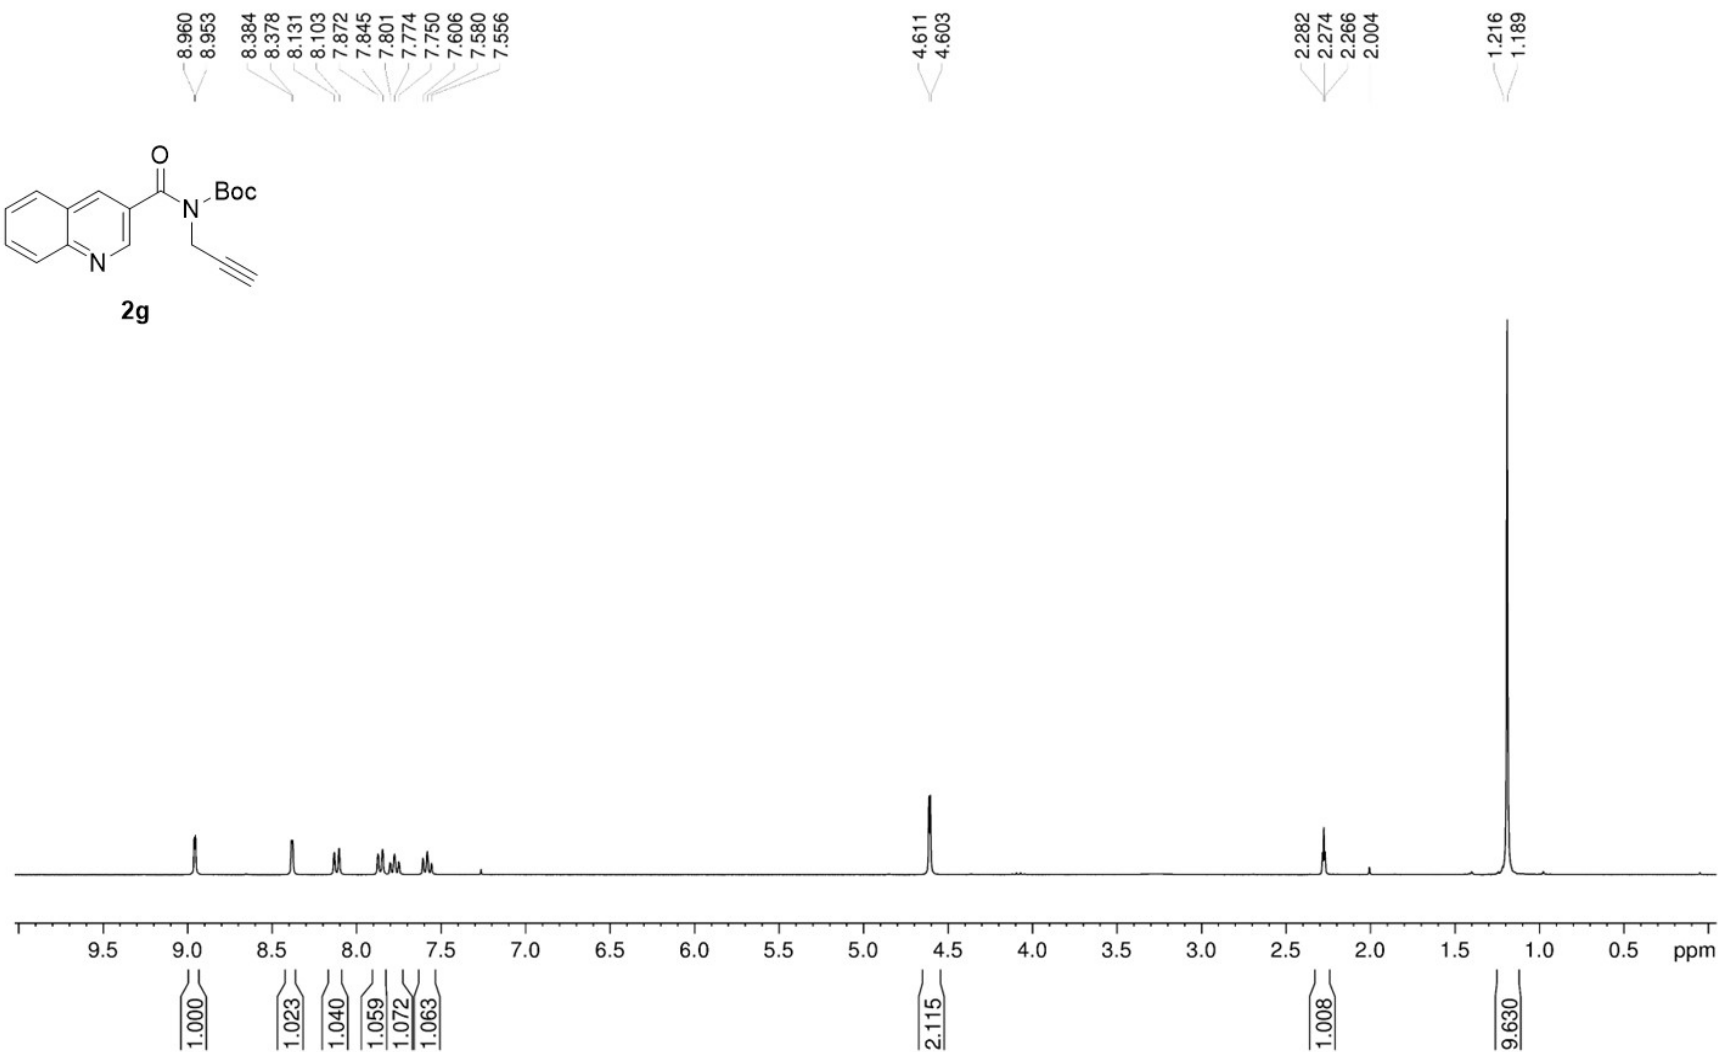

$^1\text{H}$  NMR (300 MHz,  $\text{CDCl}_3$ ) of **2g**

YTH3167-B-20251020

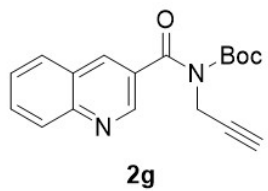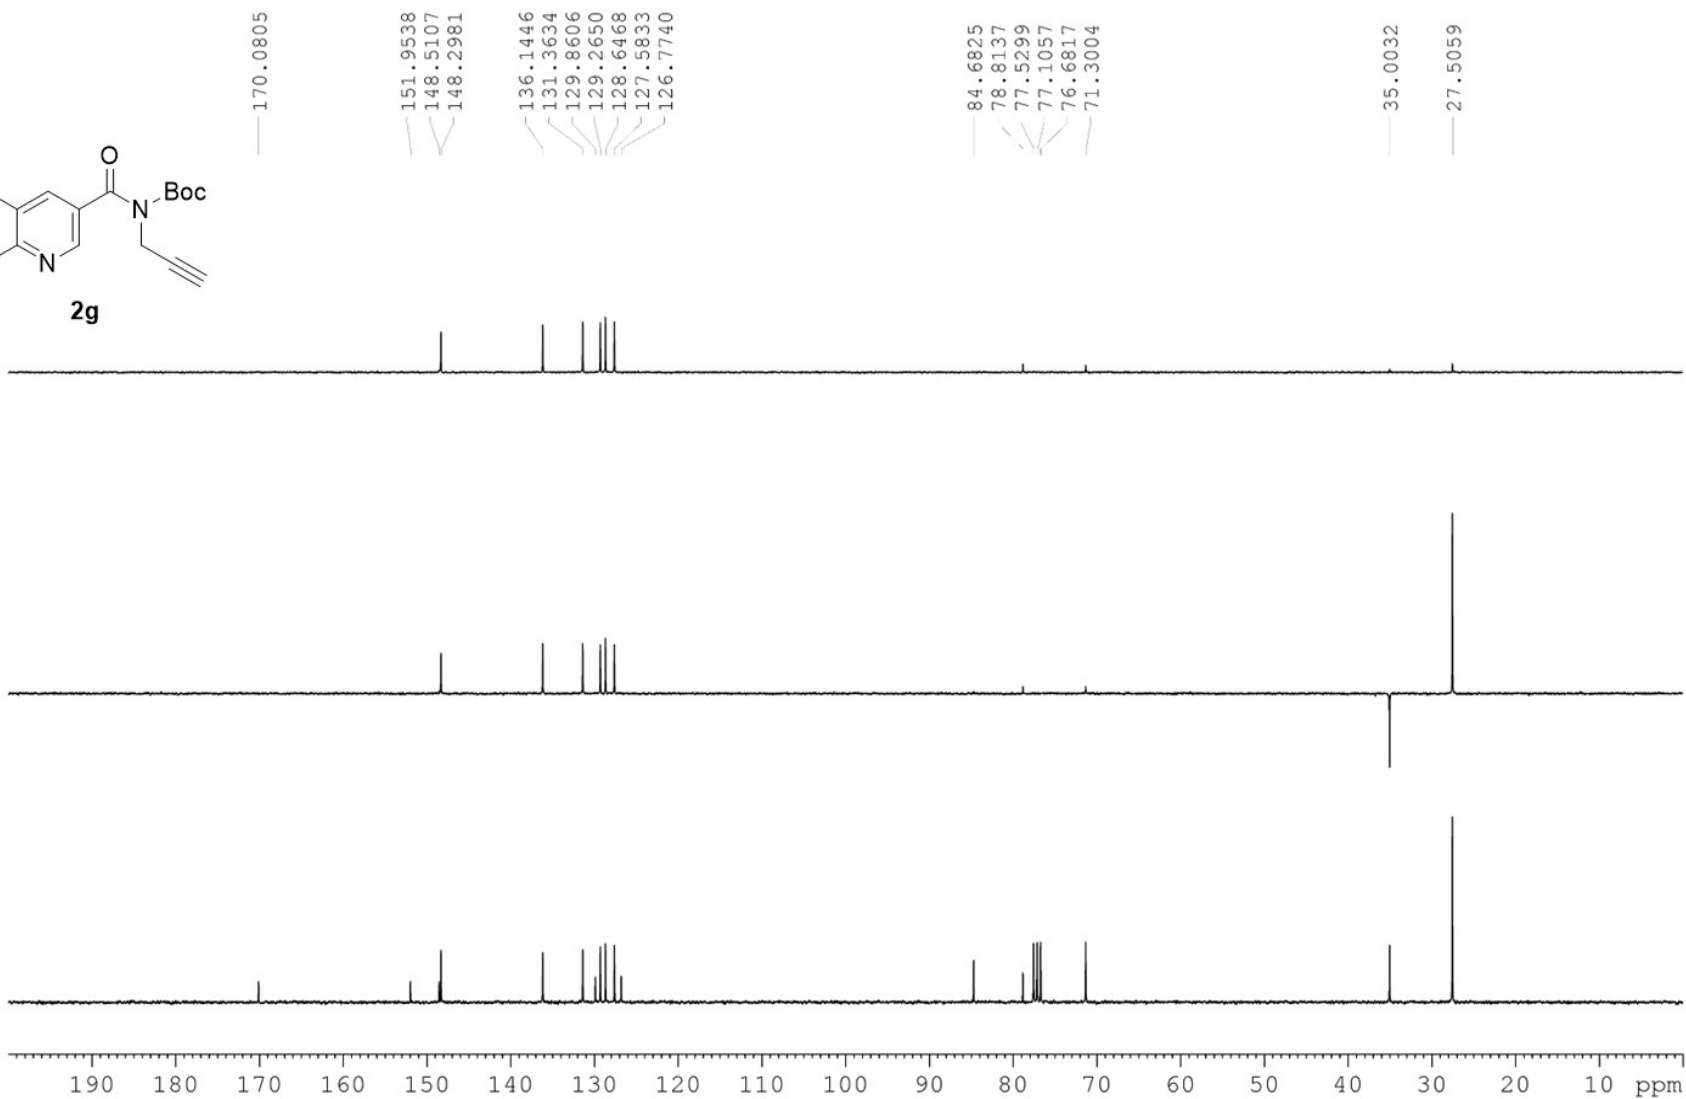

$^{13}\text{C}\{^1\text{H}\}$ -DEPT NMR (75 MHz,  $\text{CDCl}_3$ ) of **2g**

## Elemental Composition Report

Page 1

### Single Mass Analysis

Tolerance = 500.0 PPM / DBE: min = -10.0, max = 100.0

Element prediction: Off

Number of isotope peaks used for i-FIT = 3

Monoisotopic Mass, Even Electron Ions

418 formula(e) evaluated with 147 results within limits (up to 25 closest results for each mass)

Elements Used:

C: 1-100 H: 1-100 N: 1-10 O: 1-10

YTH2188B

251211FJU03-3 274 (2.683) Cm (273:276-(259:265+294:301))

1: TOF MS ES+  
1.01e+005

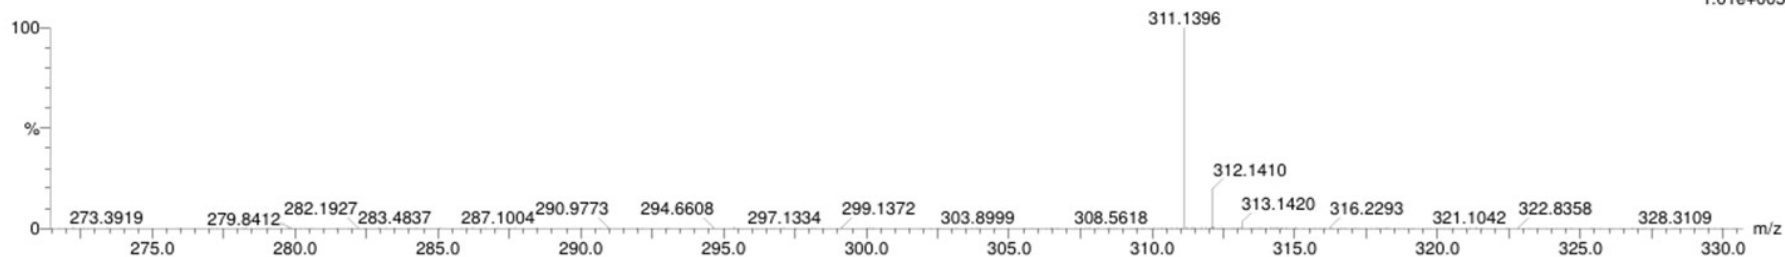

Minimum: 80.00  
Maximum: 100.00

| Mass     | RA     | Calc. Mass | mDa   | PPM   | DBE  | Formula       |
|----------|--------|------------|-------|-------|------|---------------|
| 311.1396 | 100.00 | 311.1396   | 0.0   | 0.0   | 10.5 | C18 H19 N2 O3 |
|          |        | 311.1387   | 0.9   | 2.9   | -1.5 | C2 H19 N10 O8 |
|          |        | 311.1414   | -1.8  | -5.8  | -2.5 | C6 H23 N4 O10 |
|          |        | 311.1369   | 2.7   | 8.7   | 11.5 | C14 H15 N8 O  |
|          |        | 311.1428   | -3.2  | -10.3 | 2.5  | C7 H19 N8 O6  |
|          |        | 311.1355   | 4.1   | 13.2  | 6.5  | C13 H19 N4 O5 |
|          |        | 311.1454   | -5.8  | -18.6 | 1.5  | C11 H23 N2 O8 |
|          |        | 311.1329   | 6.7   | 21.5  | 7.5  | C9 H15 N10 O3 |
|          |        | 311.1468   | -7.2  | -23.1 | 6.5  | C12 H19 N6 O4 |
|          |        | 311.1315   | 8.1   | 26.0  | 2.5  | C8 H19 N6 O7  |
|          |        | 311.1508   | -11.2 | -36.0 | 10.5 | C17 H19 N4 O2 |
|          |        | 311.1275   | 12.1  | 38.9  | -1.5 | C3 H19 N8 O9  |
|          |        | 311.1527   | -13.1 | -42.1 | -2.5 | C5 H23 N6 O9  |
|          |        | 311.1256   | 14.0  | 45.0  | 11.5 | C15 H15 N6 O2 |
|          |        | 311.1540   | -14.4 | -46.3 | 2.5  | C6 H19 N10 O5 |
|          |        | 311.1243   | 15.3  | 49.2  | 6.5  | C14 H19 N2 O6 |
|          |        | 311.1567   | -17.1 | -55.0 | 1.5  | C10 H23 N4 O7 |
|          |        | 311.1216   | 18.0  | 57.9  | 7.5  | C10 H15 N8 O4 |
|          |        | 311.1580   | -18.4 | -59.1 | 6.5  | C11 H19 N8 O3 |
|          |        | 311.1203   | 19.3  | 62.0  | 2.5  | C9 H19 N4 O8  |
|          |        | 311.1607   | -21.1 | -67.8 | 5.5  | C15 H23 N2 O5 |
|          |        | 311.1184   | 21.2  | 68.1  | 15.5 | C21 H15 N2 O  |
|          |        | 311.1176   | 22.0  | 70.7  | 3.5  | C5 H15 N10 O6 |
|          |        | 311.1620   | -22.4 | -72.0 | 10.5 | C16 H19 N6 O  |
|          |        | 311.1163   | 23.3  | 74.9  | -1.5 | C4 H19 N6 O10 |

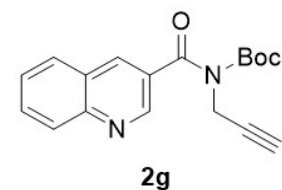

HRMS (ESI<sup>+</sup>) of **2g**

YTH3166-B-20251017

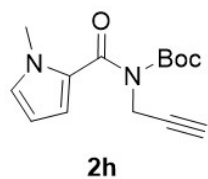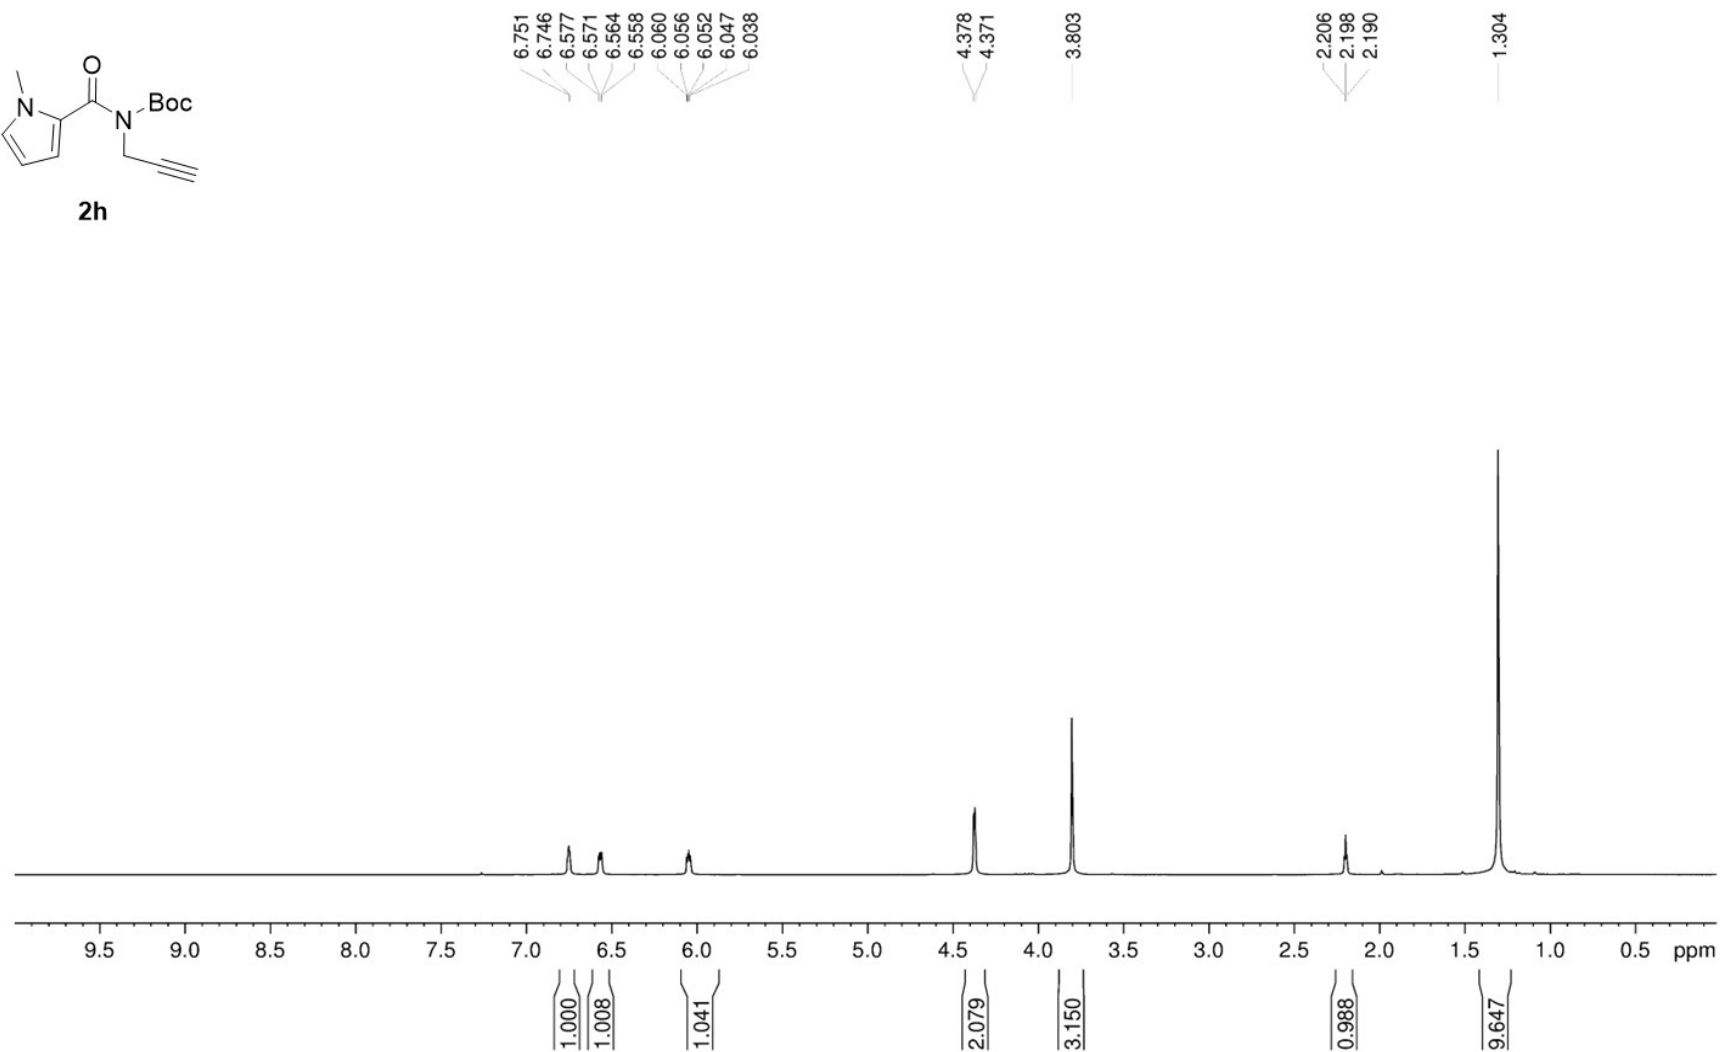

$^1\text{H}$  NMR (300 MHz,  $\text{CDCl}_3$ ) of **2h**

YTH3166-B-20251017

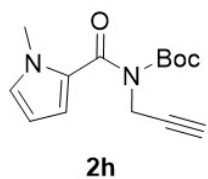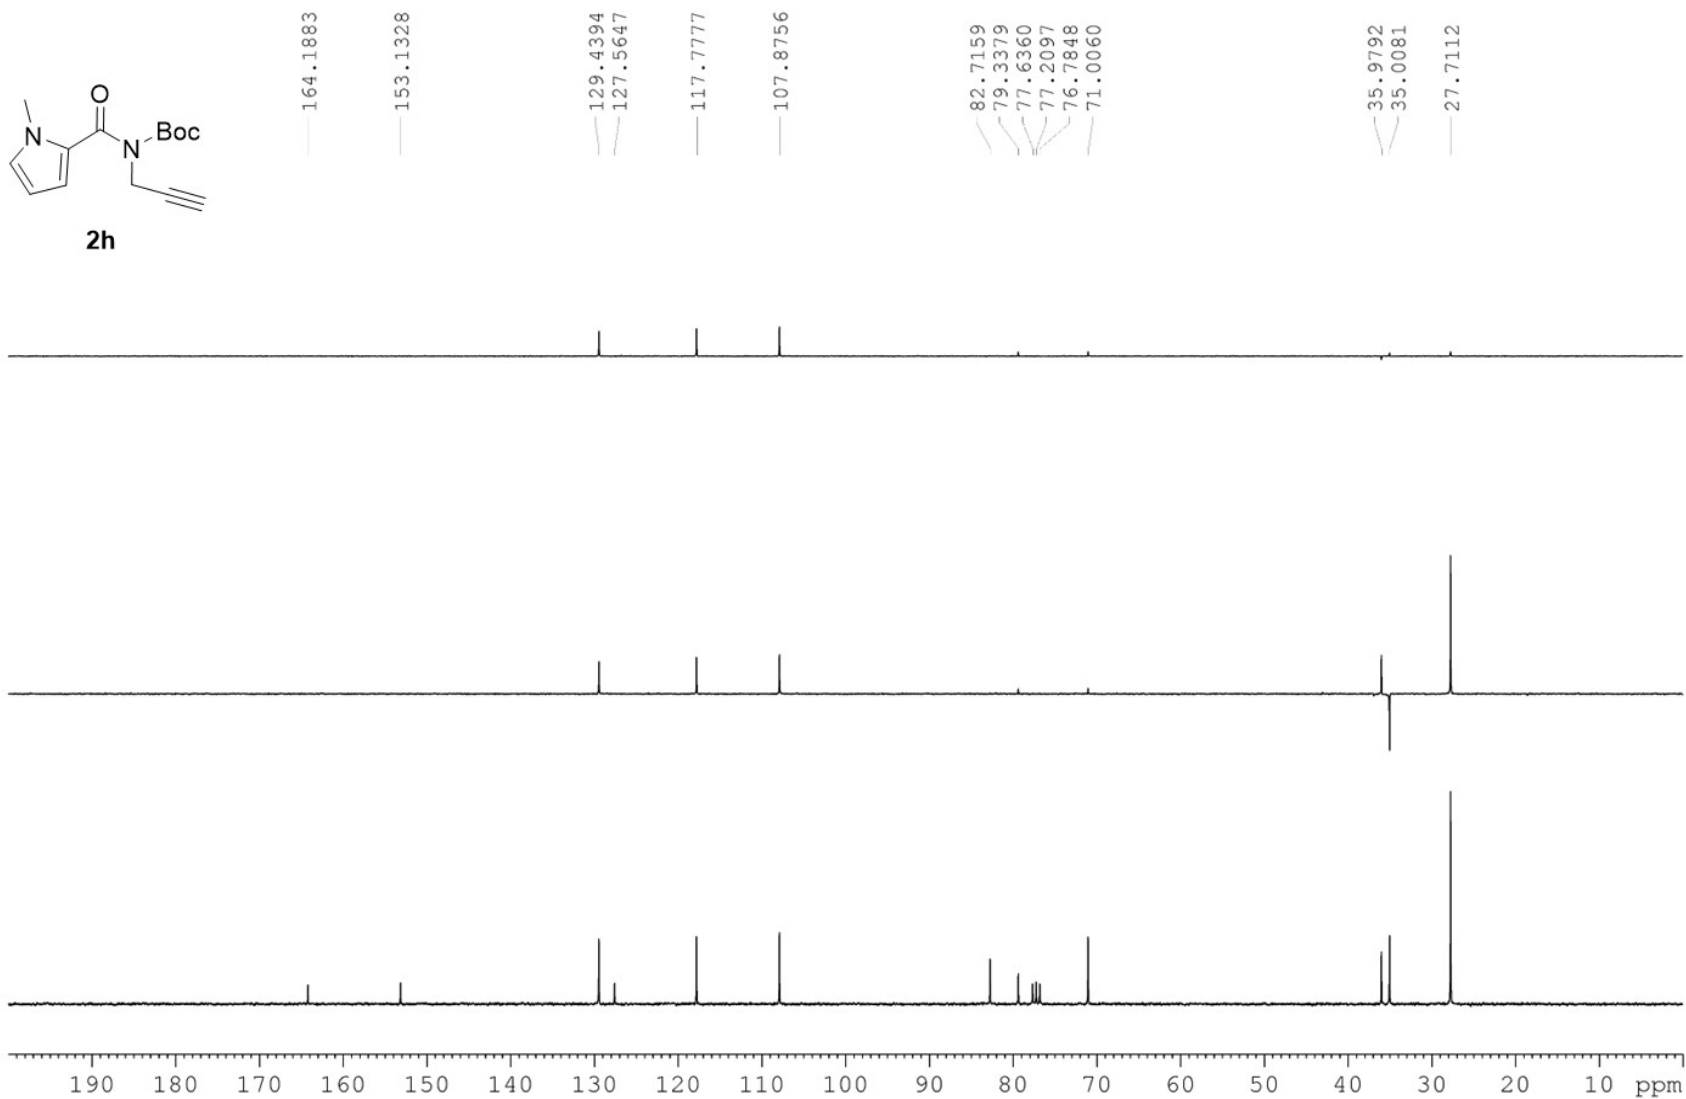

$^{13}\text{C}\{^1\text{H}\}$ -DEPT NMR (75 MHz,  $\text{CDCl}_3$ ) of **2h**

## Elemental Composition Report

Page 1

### Single Mass Analysis

Tolerance = 500.0 PPM / DBE: min = -10.0, max = 100.0

Element prediction: Off

Number of isotope peaks used for i-FIT = 3

Monoisotopic Mass, Even Electron Ions

691 formula(e) evaluated with 248 results within limits (up to 25 closest results for each mass)

Elements Used:

C: 1-100 H: 1-100 N: 1-10 O: 1-10 Na: 0-1

YTH3166B

251112FJU08 280 (2.735) Cm (277:290-(259:268+329:339))

1: TOF MS ES+  
5.18e+04

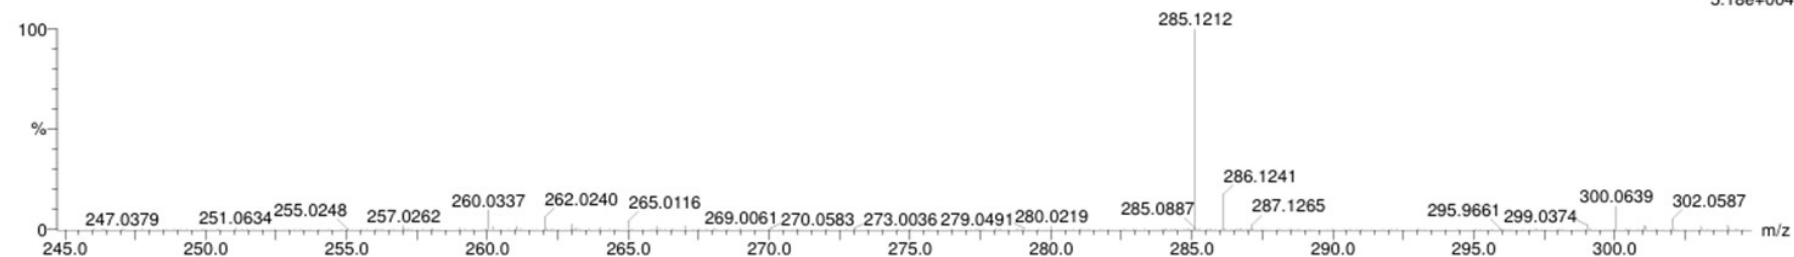

Minimum: 80.00  
Maximum: 100.00

| Mass     | RA     | Calc. Mass | mDa   | PPM   | DBE  | Formula          |
|----------|--------|------------|-------|-------|------|------------------|
| 285.1212 | 100.00 | 285.1215   | -0.3  | -1.1  | 6.5  | C14 H18 N2 O3 Na |
|          |        | 285.1274   | -6.2  | -21.7 | -2.5 | C7 H22 N2 O8 Na  |
|          |        | 285.1087   | 12.5  | 43.8  | 5.5  | C12 H17 N2 O6    |
|          |        | 285.1298   | -8.6  | -30.2 | 0.5  | C9 H21 N2 O8     |
|          |        | 285.1239   | -2.7  | -9.5  | 9.5  | C16 H17 N2 O3    |
|          |        | 285.1327   | -11.5 | -40.3 | 6.5  | C13 H18 N4 O2 Na |
|          |        | 285.1352   | -14.0 | -49.1 | 9.5  | C15 H17 N4 O2    |
|          |        | 285.1234   | -2.2  | -7.7  | -6.5 | C2 H22 N4 O10 Na |
|          |        | 285.1175   | 3.7   | 13.0  | 2.5  | C9 H18 N4 O5 Na  |
|          |        | 285.1199   | 1.3   | 4.6   | 5.5  | C11 H17 N4 O5    |
|          |        | 285.1258   | -4.6  | -16.1 | -3.5 | C4 H21 N4 O10    |
|          |        | 285.1311   | -9.9  | -34.7 | 5.5  | C10 H17 N6 O4    |
|          |        | 285.1287   | -7.5  | -26.3 | 2.5  | C8 H18 N6 O4 Na  |
|          |        | 285.1159   | 5.3   | 18.6  | 1.5  | C6 H17 N6 O7     |
|          |        | 285.1076   | 13.6  | 47.7  | 7.5  | C11 H14 N6 O2 Na |
|          |        | 285.1346   | -13.4 | -47.0 | -6.5 | C H22 N6 O9 Na   |
|          |        | 285.1100   | 11.2  | 39.3  | 10.5 | C13 H13 N6 O2    |
|          |        | 285.1135   | 7.7   | 27.0  | -1.5 | C4 H18 N6 O7 Na  |
|          |        | 285.1118   | 9.4   | 33.0  | -2.5 | C H17 N8 O9      |
|          |        | 285.1188   | 2.4   | 8.4   | 7.5  | C10 H14 N8 O Na  |
|          |        | 285.1271   | -5.9  | -20.7 | 1.5  | C5 H17 N8 O6     |
|          |        | 285.1247   | -3.5  | -12.3 | -1.5 | C3 H18 N8 O6 Na  |
|          |        | 285.1212   | 0.0   | 0.0   | 10.5 | C12 H13 N8 O     |
|          |        | 285.1172   | 4.0   | 14.0  | 6.5  | C7 H13 N10 O3    |
|          |        | 285.1148   | 6.4   | 22.4  | 3.5  | C5 H14 N10 O3 Na |

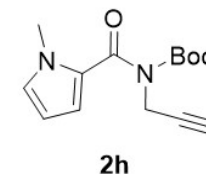

HRMS (ESI<sup>+</sup>) of **2h**

YTH2199-B-20250927

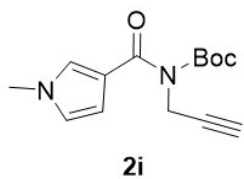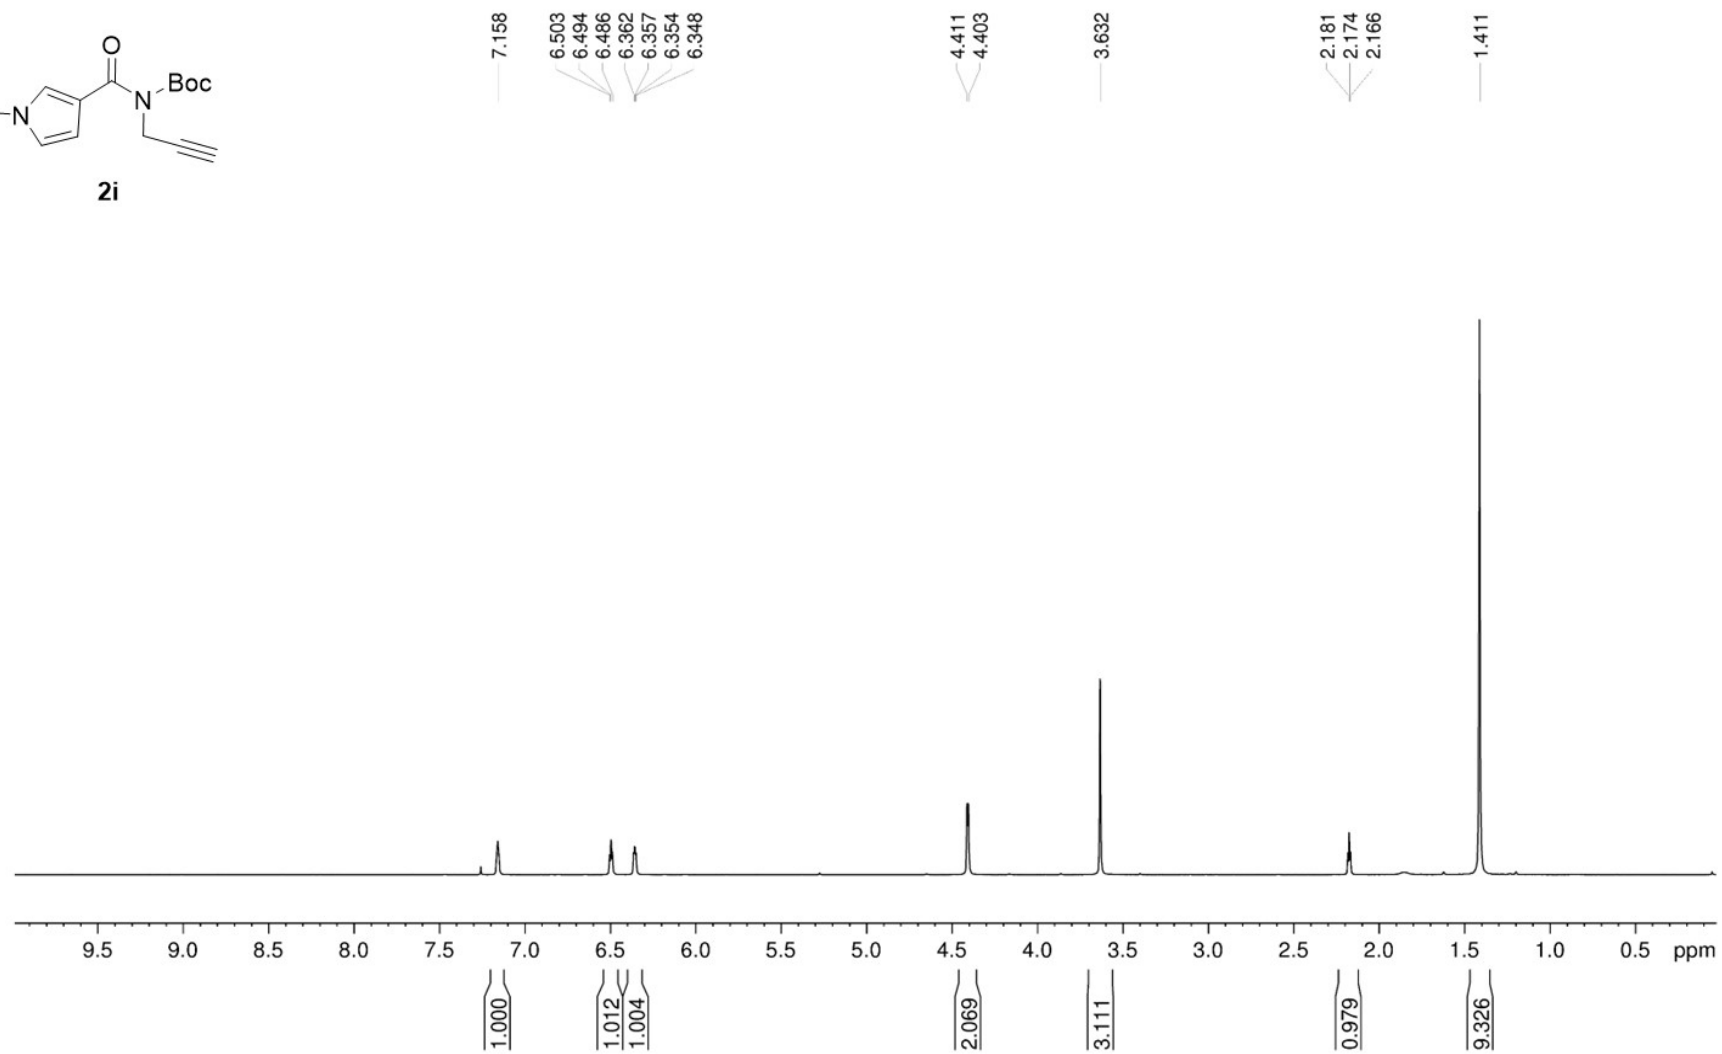

$^1\text{H}$  NMR (300 MHz,  $\text{CDCl}_3$ ) of **2i**

YTH2199-B-20250927

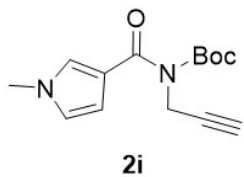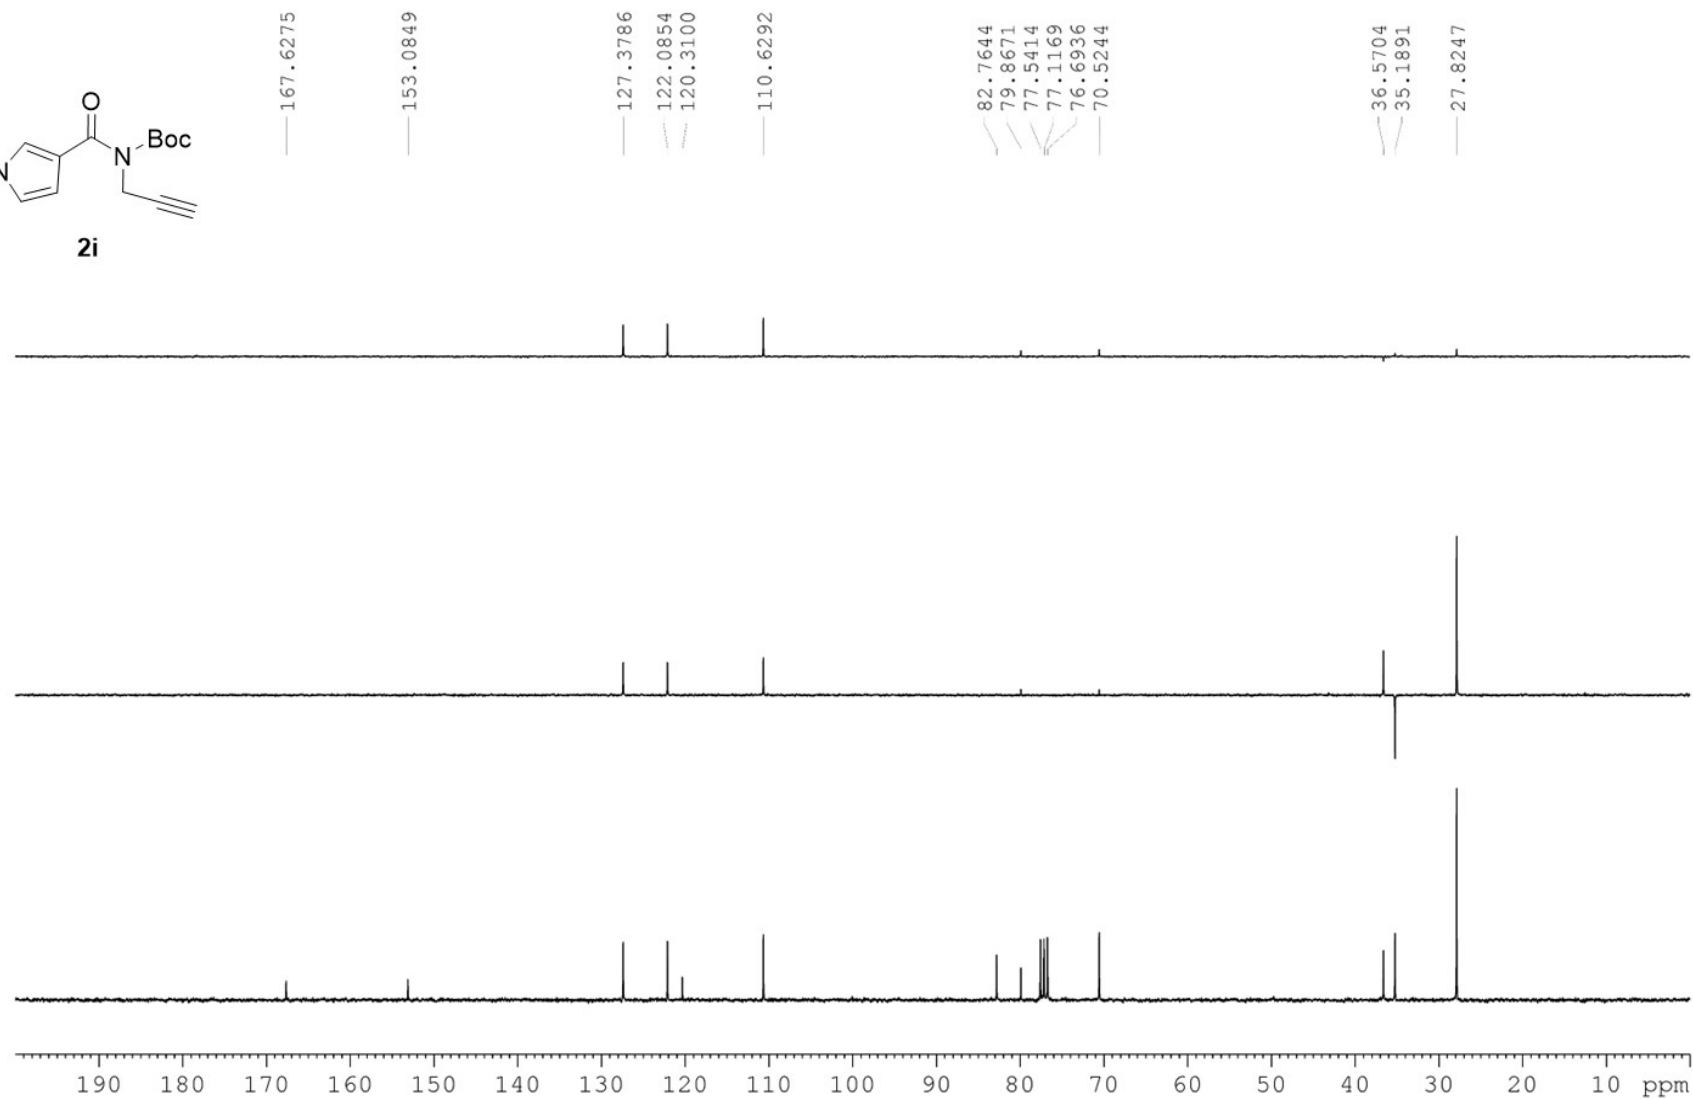

$^{13}\text{C}\{^1\text{H}\}$ -DEPT NMR (75 MHz,  $\text{CDCl}_3$ ) of **2i**

## Elemental Composition Report

### Single Mass Analysis

Tolerance = 500.0 PPM / DBE: min = -10.0, max = 100.0

Element prediction: Off

Number of isotope peaks used for i-FIT = 3

Monoisotopic Mass, Even Electron Ions

691 formula(e) evaluated with 248 results within limits (up to 25 closest results for each mass)

Elements Used:

C: 1-100 H: 1-100 N: 1-10 O: 1-10 Na: 0-1

YTH2199B

250924FJU46 264 (2.578) Cm (262:273-(246:252+301:307))

1: TOF MS ES+  
5.31e+004

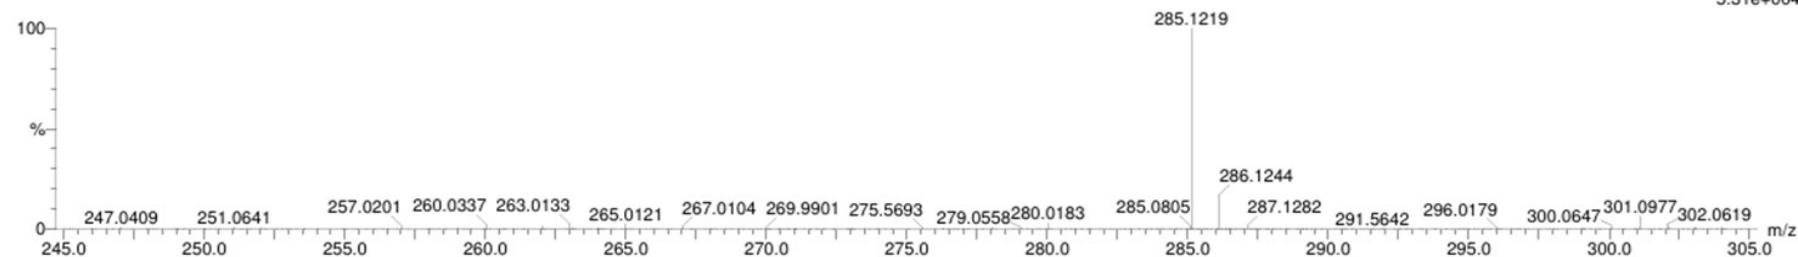

Minimum: 80.00  
Maximum: 100.00

| Mass     | RA     | Calc. Mass | mDa   | PPM   | DBE  | Formula          |
|----------|--------|------------|-------|-------|------|------------------|
| 285.1219 | 100.00 | 285.1215   | 0.4   | 1.4   | 6.5  | C14 H18 N2 O3 Na |
|          |        | 285.1212   | 0.7   | 2.5   | 10.5 | C12 H13 N8 O     |
|          |        | 285.1234   | -1.5  | -5.3  | -6.5 | C2 H22 N4 O10 Na |
|          |        | 285.1239   | -2.0  | -7.0  | 9.5  | C16 H17 N2 O3    |
|          |        | 285.1199   | 2.0   | 7.0   | 5.5  | C11 H17 N4 O5    |
|          |        | 285.1247   | -2.8  | -9.8  | -1.5 | C3 H18 N8 O6 Na  |
|          |        | 285.1188   | 3.1   | 10.9  | 7.5  | C10 H14 N8 O Na  |
|          |        | 285.1258   | -3.9  | -13.7 | -3.5 | C4 H21 N4 O10    |
|          |        | 285.1175   | 4.4   | 15.4  | 2.5  | C9 H18 N4 O5 Na  |
|          |        | 285.1172   | 4.7   | 16.5  | 6.5  | C7 H13 N10 O3    |
|          |        | 285.1271   | -5.2  | -18.2 | 1.5  | C5 H17 N8 O6     |
|          |        | 285.1274   | -5.5  | -19.3 | -2.5 | C7 H22 N2 O8 Na  |
|          |        | 285.1159   | 6.0   | 21.0  | 1.5  | C6 H17 N6 O7     |
|          |        | 285.1287   | -6.8  | -23.8 | 2.5  | C8 H18 N6 O4 Na  |
|          |        | 285.1148   | 7.1   | 24.9  | 3.5  | C5 H14 N10 O3 Na |
|          |        | 285.1298   | -7.9  | -27.7 | 0.5  | C9 H21 N2 O8     |
|          |        | 285.1135   | 8.4   | 29.5  | -1.5 | C4 H18 N6 O7 Na  |
|          |        | 285.1311   | -9.2  | -32.3 | 5.5  | C10 H17 N6 O4    |
|          |        | 285.1118   | 10.1  | 35.4  | -2.5 | C H17 N8 O9      |
|          |        | 285.1327   | -10.8 | -37.9 | 6.5  | C13 H18 N4 O2 Na |
|          |        | 285.1100   | 11.9  | 41.7  | 10.5 | C13 H13 N6 O2    |
|          |        | 285.1346   | -12.7 | -44.5 | -6.5 | C H22 N6 O9 Na   |
|          |        | 285.1087   | 13.2  | 46.3  | 5.5  | C12 H17 N2 O6    |
|          |        | 285.1352   | -13.3 | -46.6 | 9.5  | C15 H17 N4 O2    |
|          |        | 285.1359   | -14.0 | -49.1 | -1.5 | C2 H18 N10 O5 Na |

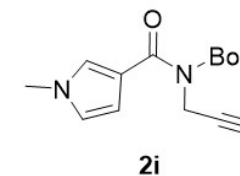

HRMS (ESI<sup>+</sup>) of **2i**

YTH3093-B-20250529

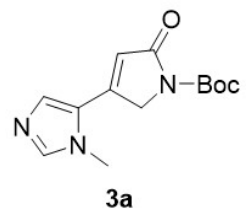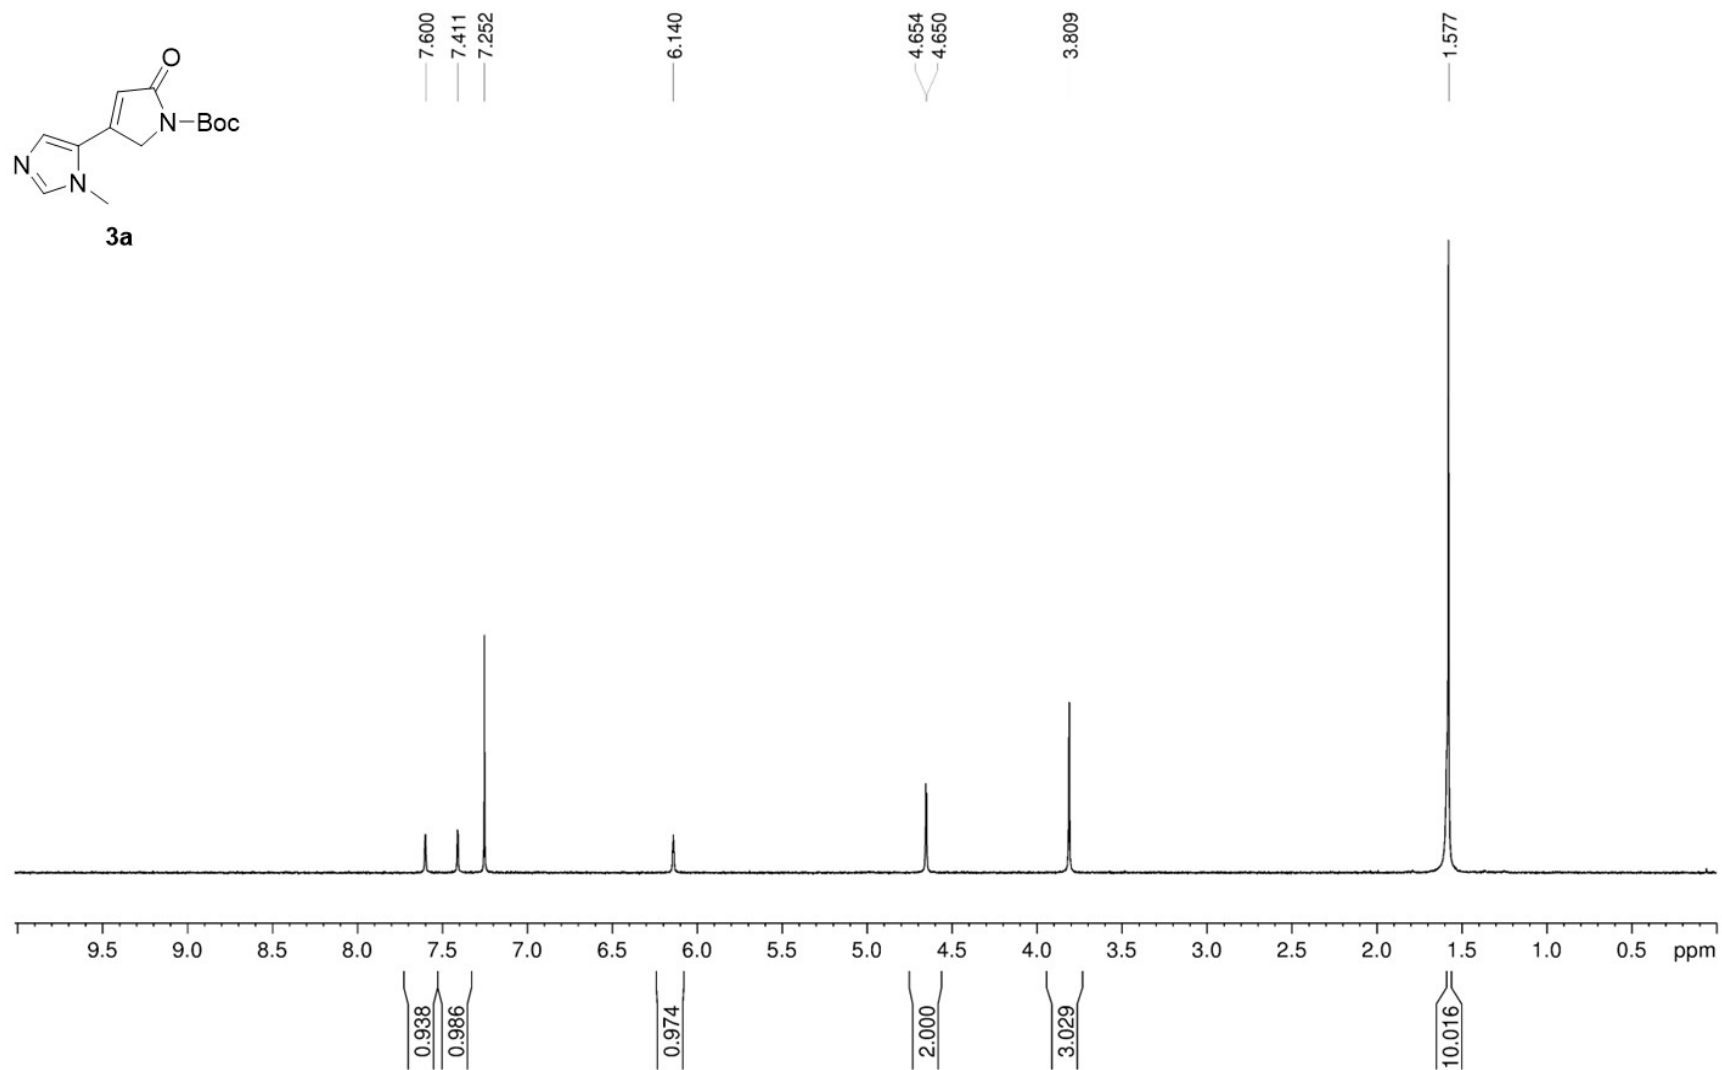

$^1\text{H}$  NMR (300 MHz,  $\text{CDCl}_3$ ) of **3a** (water peak at around 1.6 ppm)

YTH2138-B1-20240531

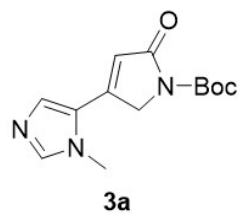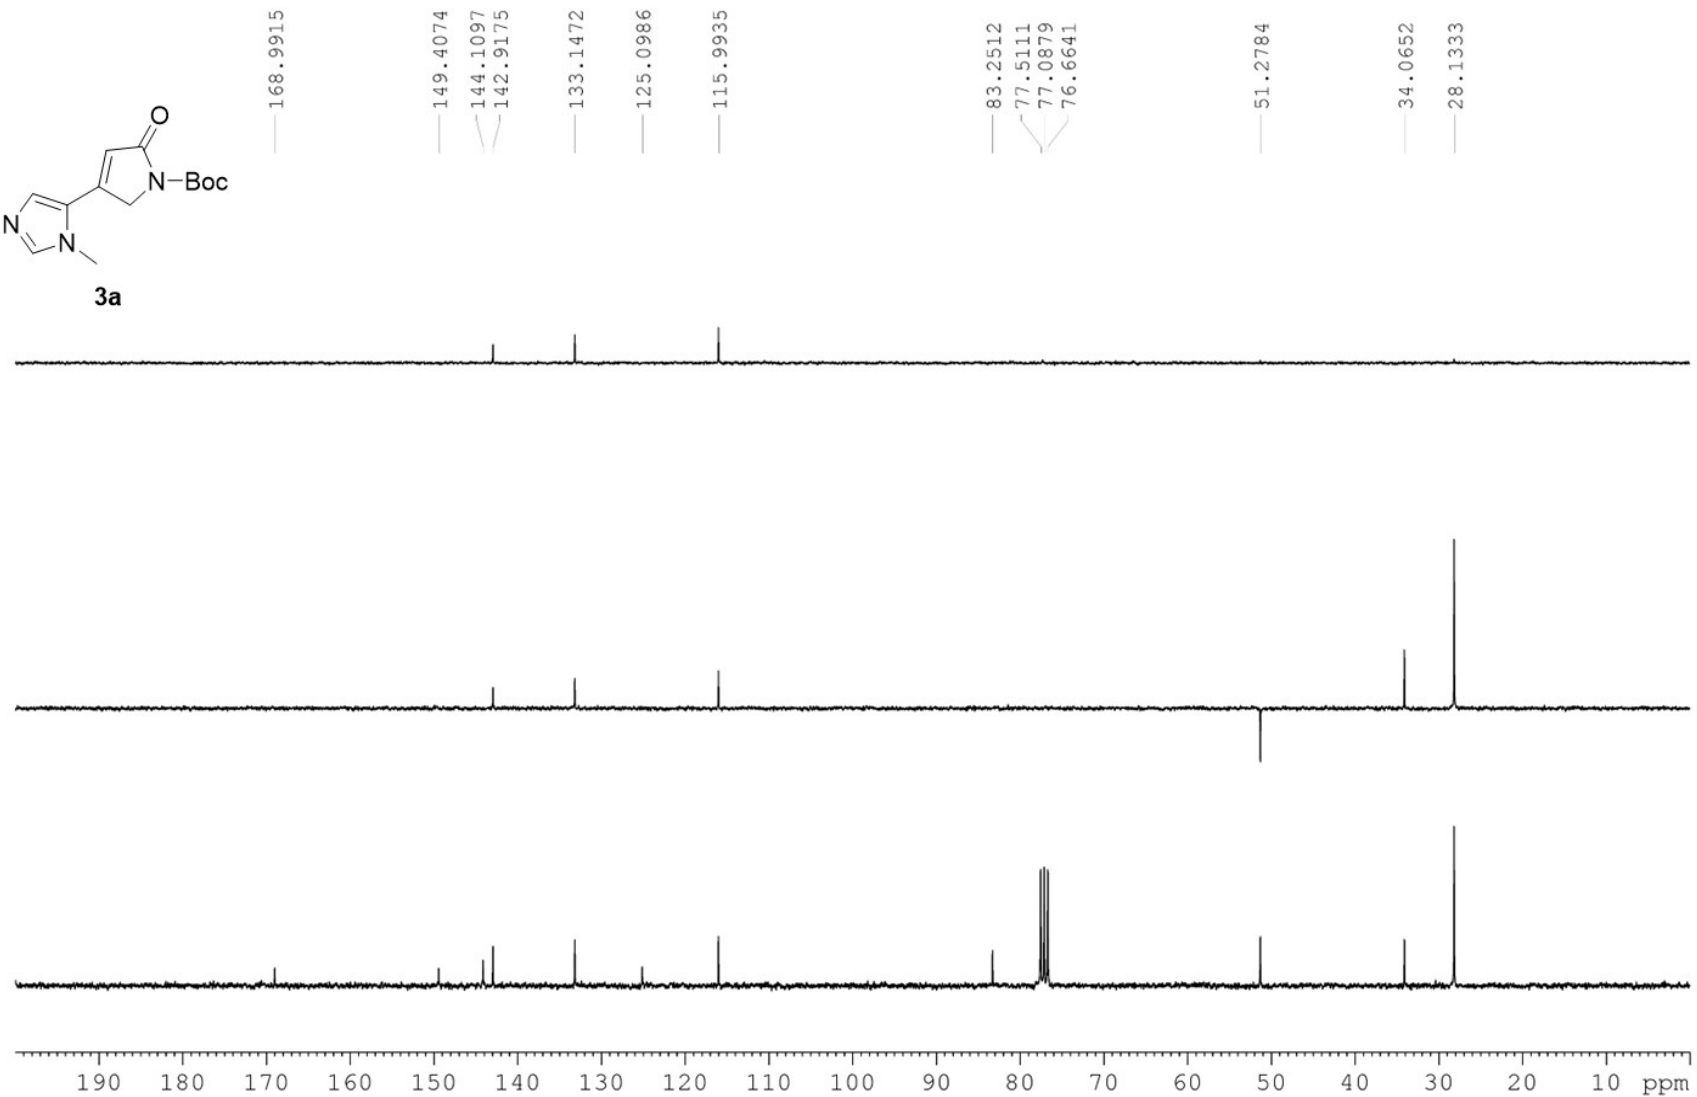

$^{13}\text{C}\{^1\text{H}\}$ -DEPT NMR (75 MHz,  $\text{CDCl}_3$ ) of **3a**

## Elemental Composition Report

Page 1

### Single Mass Analysis

Tolerance = 500.0 PPM / DBE: min = -10.0, max = 100.0

Element prediction: Off

Number of isotope peaks used for i-FIT = 3

Monoisotopic Mass, Even Electron Ions

323 formula(e) evaluated with 122 results within limits (up to 25 closest results for each mass)

Elements Used:

C: 1-100 H: 1-100 N: 1-10 O: 1-10

YTH3135B

251112FJU07 165 (1.630) Cm (164:166-(151:158+183:190))

1: TOF MS ES+  
1.55e+004

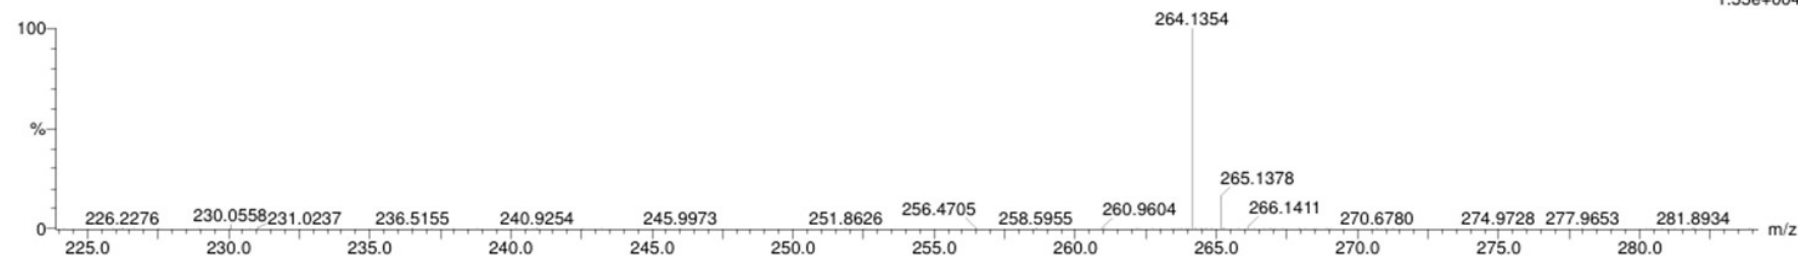

Minimum: 80.00  
Maximum: 100.00

| Mass     | RA     | Calc. Mass | mDa   | PPM   | DBE  | Formula       |
|----------|--------|------------|-------|-------|------|---------------|
| 264.1354 | 100.00 |            |       |       |      |               |
|          |        | 264.1348   | 0.6   | 2.3   | 6.5  | C13 H18 N3 O3 |
|          |        | 264.1367   | -1.3  | -4.9  | -6.5 | C H22 N5 O10  |
|          |        | 264.1380   | -2.6  | -9.8  | -1.5 | C2 H18 N9 O6  |
|          |        | 264.1321   | 3.3   | 12.5  | 7.5  | C9 H14 N9 O   |
|          |        | 264.1388   | -3.4  | -12.9 | 10.5 | C18 H18 N O   |
|          |        | 264.1308   | 4.6   | 17.4  | 2.5  | C8 H18 N5 O5  |
|          |        | 264.1407   | -5.3  | -20.1 | -2.5 | C6 H22 N3 O8  |
|          |        | 264.1295   | 5.9   | 22.3  | -2.5 | C7 H22 N O9   |
|          |        | 264.1420   | -6.6  | -25.0 | 2.5  | C7 H18 N7 O4  |
|          |        | 264.1268   | 8.6   | 32.6  | -1.5 | C3 H18 N7 O7  |
|          |        | 264.1447   | -9.3  | -35.2 | 1.5  | C11 H22 N O6  |
|          |        | 264.1460   | -10.6 | -40.1 | 6.5  | C12 H18 N5 O2 |
|          |        | 264.1236   | 11.8  | 44.7  | 6.5  | C14 H18 N O4  |
|          |        | 264.1209   | 14.5  | 54.9  | 7.5  | C10 H14 N7 O2 |
|          |        | 264.1196   | 15.8  | 59.8  | 2.5  | C9 H18 N3 O6  |
|          |        | 264.1519   | -16.5 | -62.5 | -2.5 | C5 H22 N5 O7  |
|          |        | 264.1533   | -17.9 | -67.8 | 2.5  | C6 H18 N9 O3  |
|          |        | 264.1169   | 18.5  | 70.0  | 3.5  | C5 H14 N9 O4  |
|          |        | 264.1155   | 19.9  | 75.3  | -1.5 | C4 H18 N5 O8  |
|          |        | 264.1559   | -20.5 | -77.6 | 1.5  | C10 H22 N3 O5 |
|          |        | 264.1137   | 21.7  | 82.2  | 11.5 | C16 H14 N3 O  |
|          |        | 264.1573   | -21.9 | -82.9 | 6.5  | C11 H18 N7 O  |
|          |        | 264.1600   | -24.6 | -93.1 | 5.5  | C15 H22 N O3  |
|          |        | 264.1097   | 25.7  | 97.3  | 7.5  | C11 H14 N5 O3 |
|          |        | 264.1618   | -26.4 | -99.9 | -7.5 | C3 H26 N3 O10 |

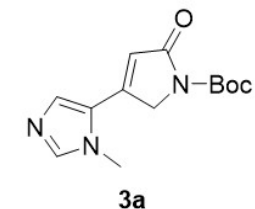

HRMS (ESI<sup>+</sup>) of **3a**

YTH2059-B3-MIX-20231221

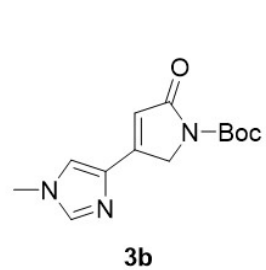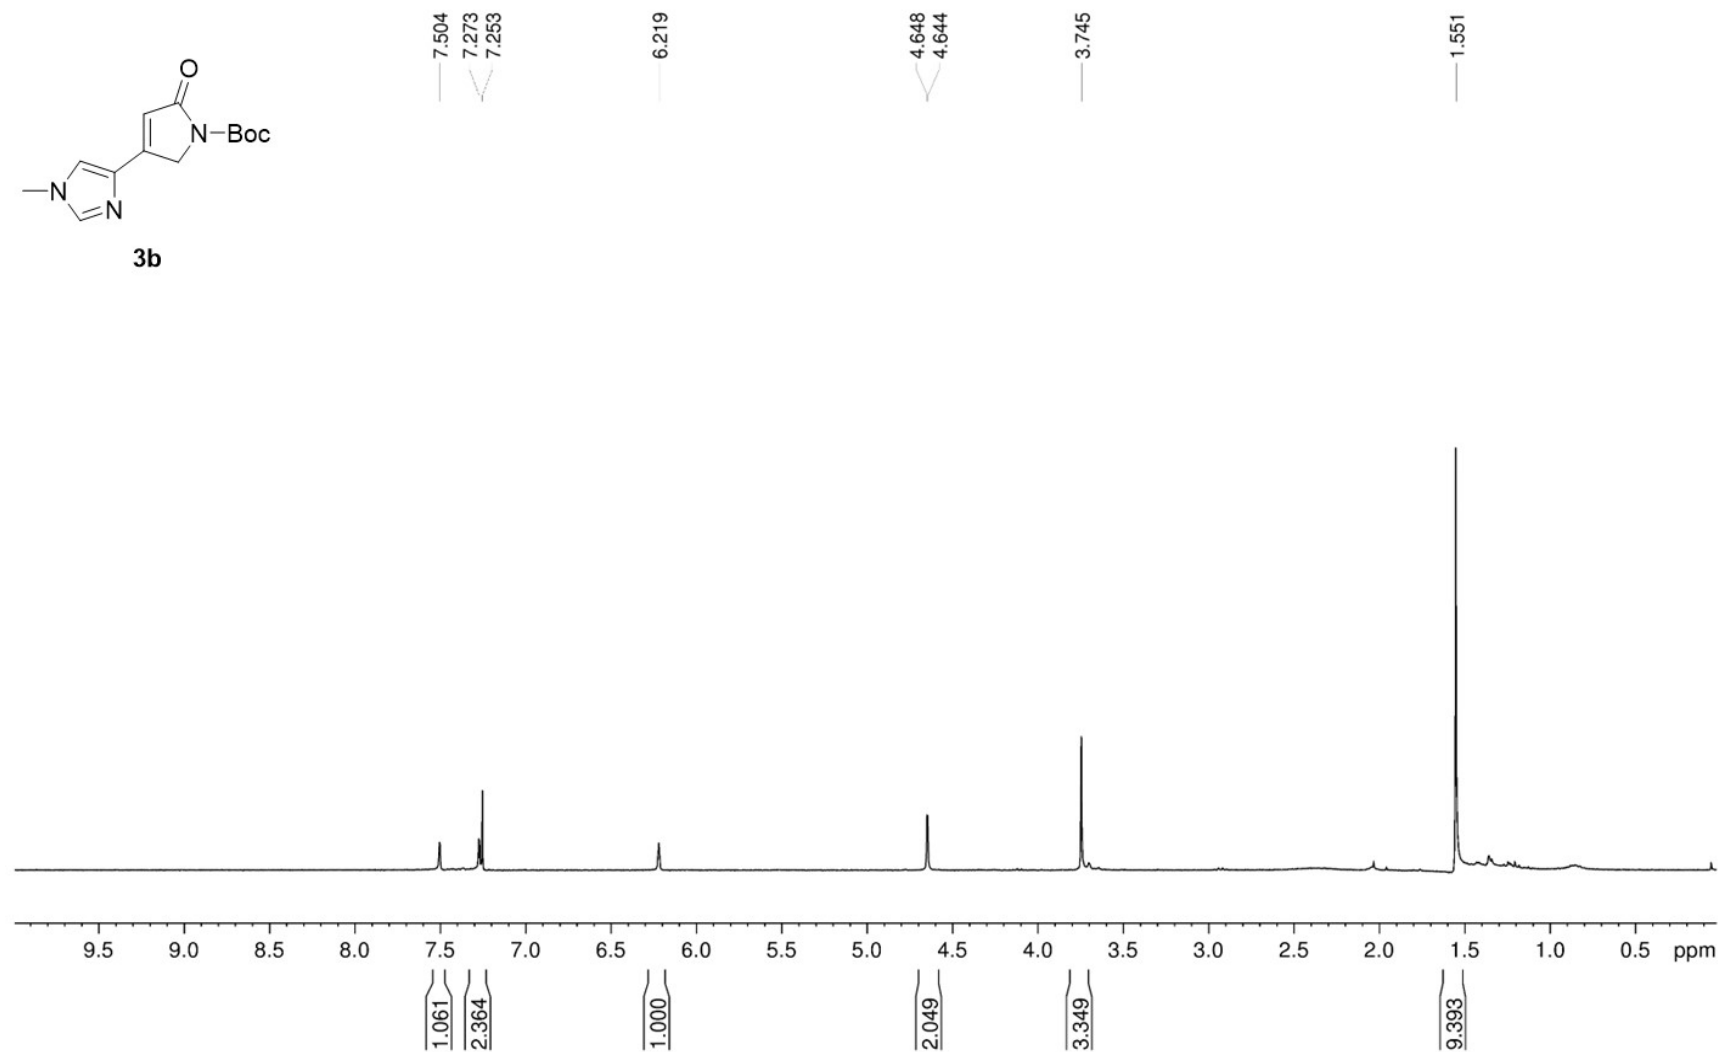

$^1\text{H}$  NMR (300 MHz,  $\text{CDCl}_3$ ) of **3b** (contaminated with tin residue)

YTH2064-B-20251106

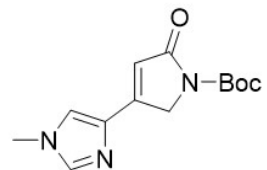

**3b**

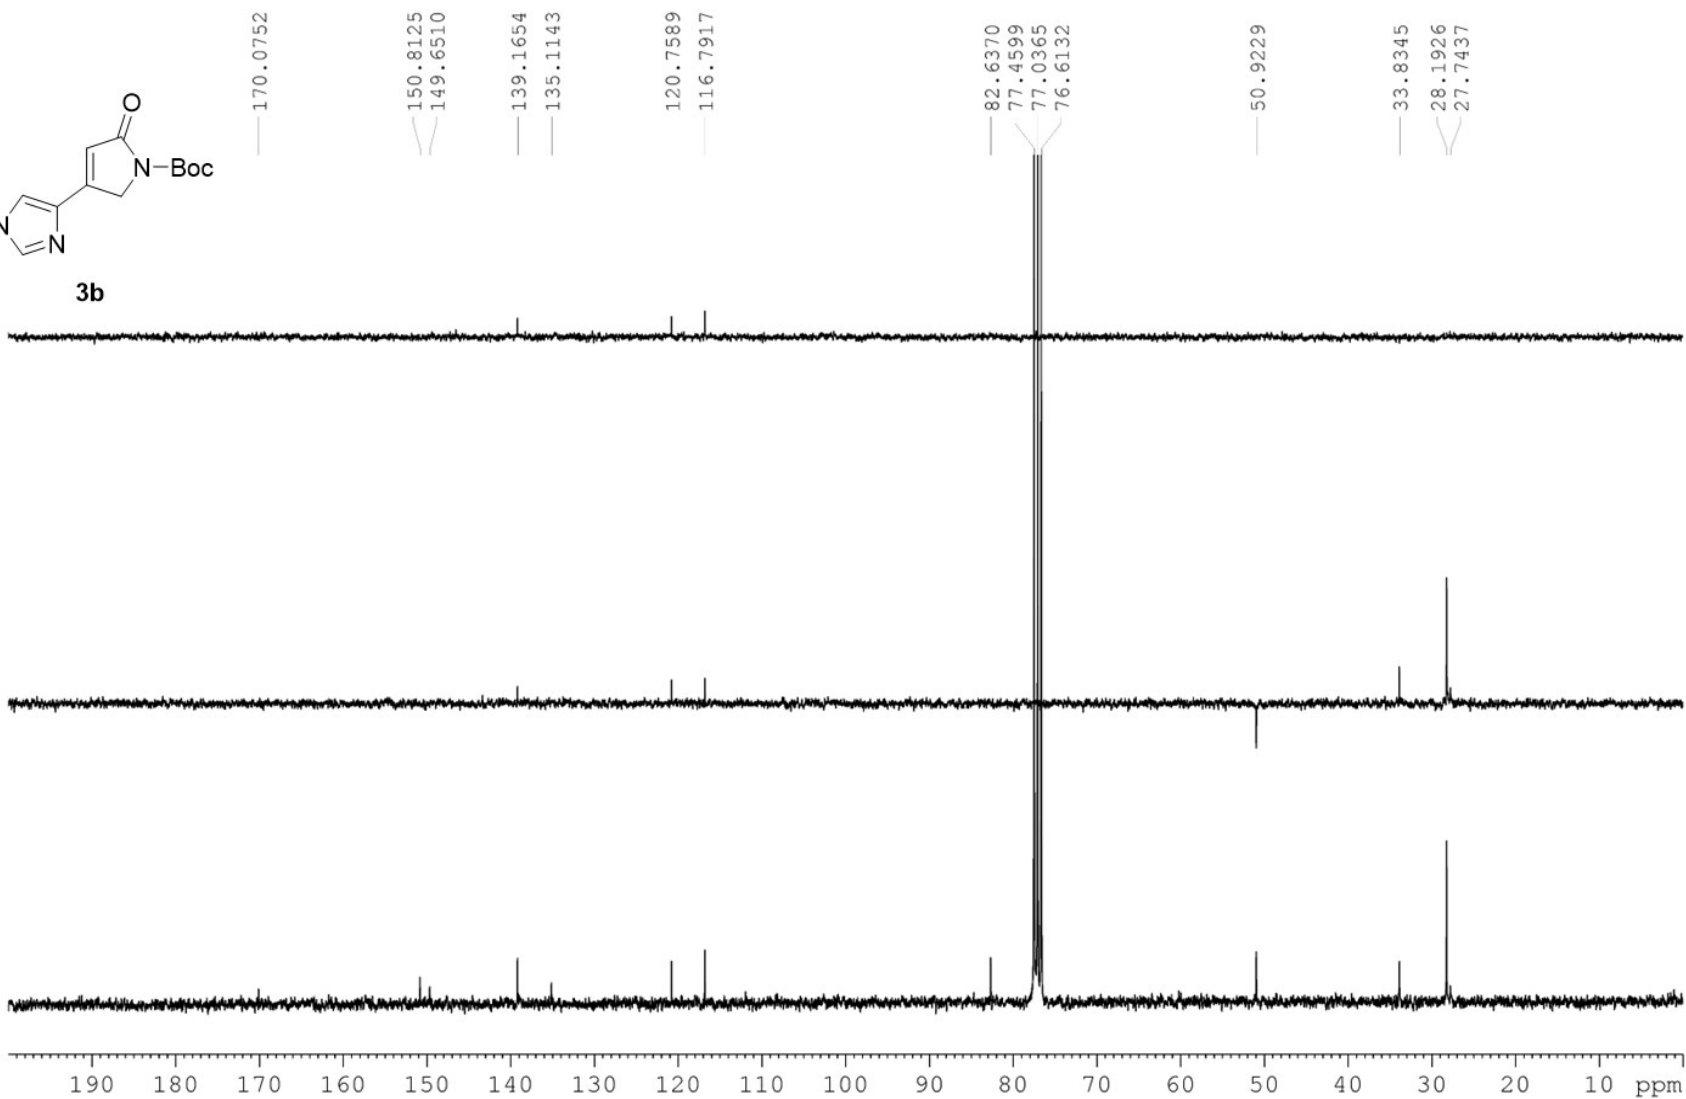

$^{13}\text{C}\{^1\text{H}\}$ -DEPT NMR (75 MHz,  $\text{CDCl}_3$ ) of **3b**

## Elemental Composition Report

### Single Mass Analysis

Tolerance = 500.0 PPM / DBE: min = -10.0, max = 100.0

Element prediction: Off

Number of isotope peaks used for i-FIT = 3

Monoisotopic Mass, Even Electron Ions

323 formula(e) evaluated with 122 results within limits (up to 25 closest results for each mass)

Elements Used:

C: 1-100 H: 1-100 N: 1-10 O: 1-10

YTH2039B

250919FJU29 109 (1.090) Cm (108:113-(93:99+134:140))

1: TOF MS ES+  
2.75e+005

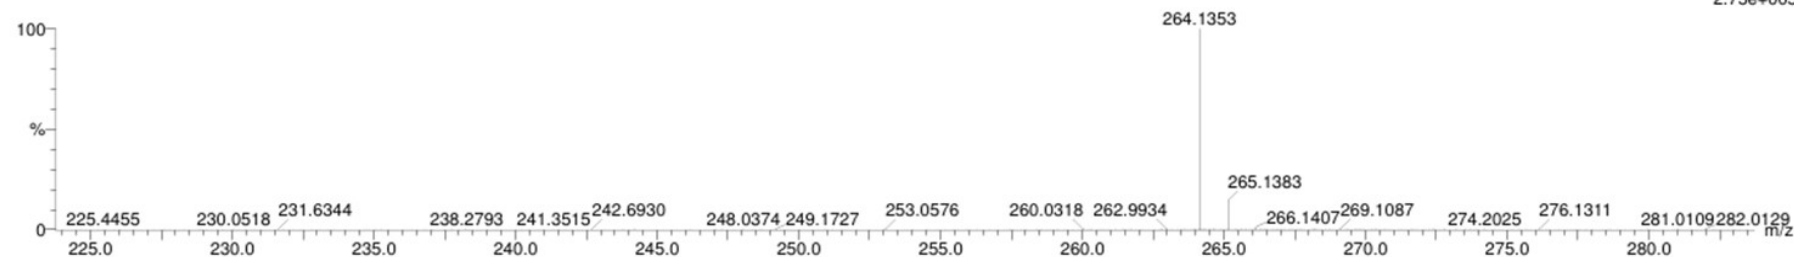

Minimum: 80.00  
Maximum: 100.00

| Mass     | RA     | Calc. Mass | mDa   | PPM    | DBE  | Formula       |
|----------|--------|------------|-------|--------|------|---------------|
| 264.1353 | 100.00 | 264.1348   | 0.5   | 1.9    | 6.5  | C13 H18 N3 O3 |
|          |        | 264.1367   | -1.4  | -5.3   | -6.5 | C H22 N5 O10  |
|          |        | 264.1380   | -2.7  | -10.2  | -1.5 | C2 H18 N9 O6  |
|          |        | 264.1321   | 3.2   | 12.1   | 7.5  | C9 H14 N9 O   |
|          |        | 264.1388   | -3.5  | -13.3  | 10.5 | C18 H18 N O   |
|          |        | 264.1308   | 4.5   | 17.0   | 2.5  | C8 H18 N5 O5  |
|          |        | 264.1407   | -5.4  | -20.4  | -2.5 | C6 H22 N3 O8  |
|          |        | 264.1295   | 5.8   | 22.0   | -2.5 | C7 H22 N O9   |
|          |        | 264.1420   | -6.7  | -25.4  | 2.5  | C7 H18 N7 O4  |
|          |        | 264.1268   | 8.5   | 32.2   | -1.5 | C3 H18 N7 O7  |
|          |        | 264.1447   | -9.4  | -35.6  | 1.5  | C11 H22 N O6  |
|          |        | 264.1460   | -10.7 | -40.5  | 6.5  | C12 H18 N5 O2 |
|          |        | 264.1236   | 11.7  | 44.3   | 6.5  | C14 H18 N O4  |
|          |        | 264.1209   | 14.4  | 54.5   | 7.5  | C10 H14 N7 O2 |
|          |        | 264.1196   | 15.7  | 59.4   | 2.5  | C9 H18 N3 O6  |
|          |        | 264.1519   | -16.6 | -62.8  | -2.5 | C5 H22 N5 O7  |
|          |        | 264.1533   | -18.0 | -68.1  | 2.5  | C6 H18 N9 O3  |
|          |        | 264.1169   | 18.4  | 69.7   | 3.5  | C5 H14 N9 O4  |
|          |        | 264.1155   | 19.8  | 75.0   | -1.5 | C4 H18 N5 O8  |
|          |        | 264.1559   | -20.6 | -78.0  | 1.5  | C10 H22 N3 O5 |
|          |        | 264.1137   | 21.6  | 81.8   | 11.5 | C16 H14 N3 O  |
|          |        | 264.1573   | -22.0 | -83.3  | 6.5  | C11 H18 N7 O  |
|          |        | 264.1600   | -24.7 | -93.5  | 5.5  | C15 H22 N O3  |
|          |        | 264.1097   | 25.6  | 96.9   | 7.5  | C11 H14 N5 O3 |
|          |        | 264.1618   | -26.5 | -100.3 | -7.5 | C3 H26 N3 O10 |

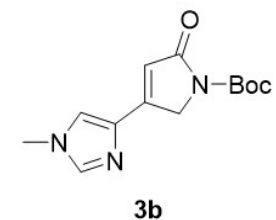

HRMS (ESI<sup>+</sup>) of **3b**

YTH2079-B-20250926

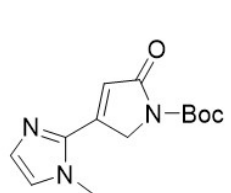

**3c**

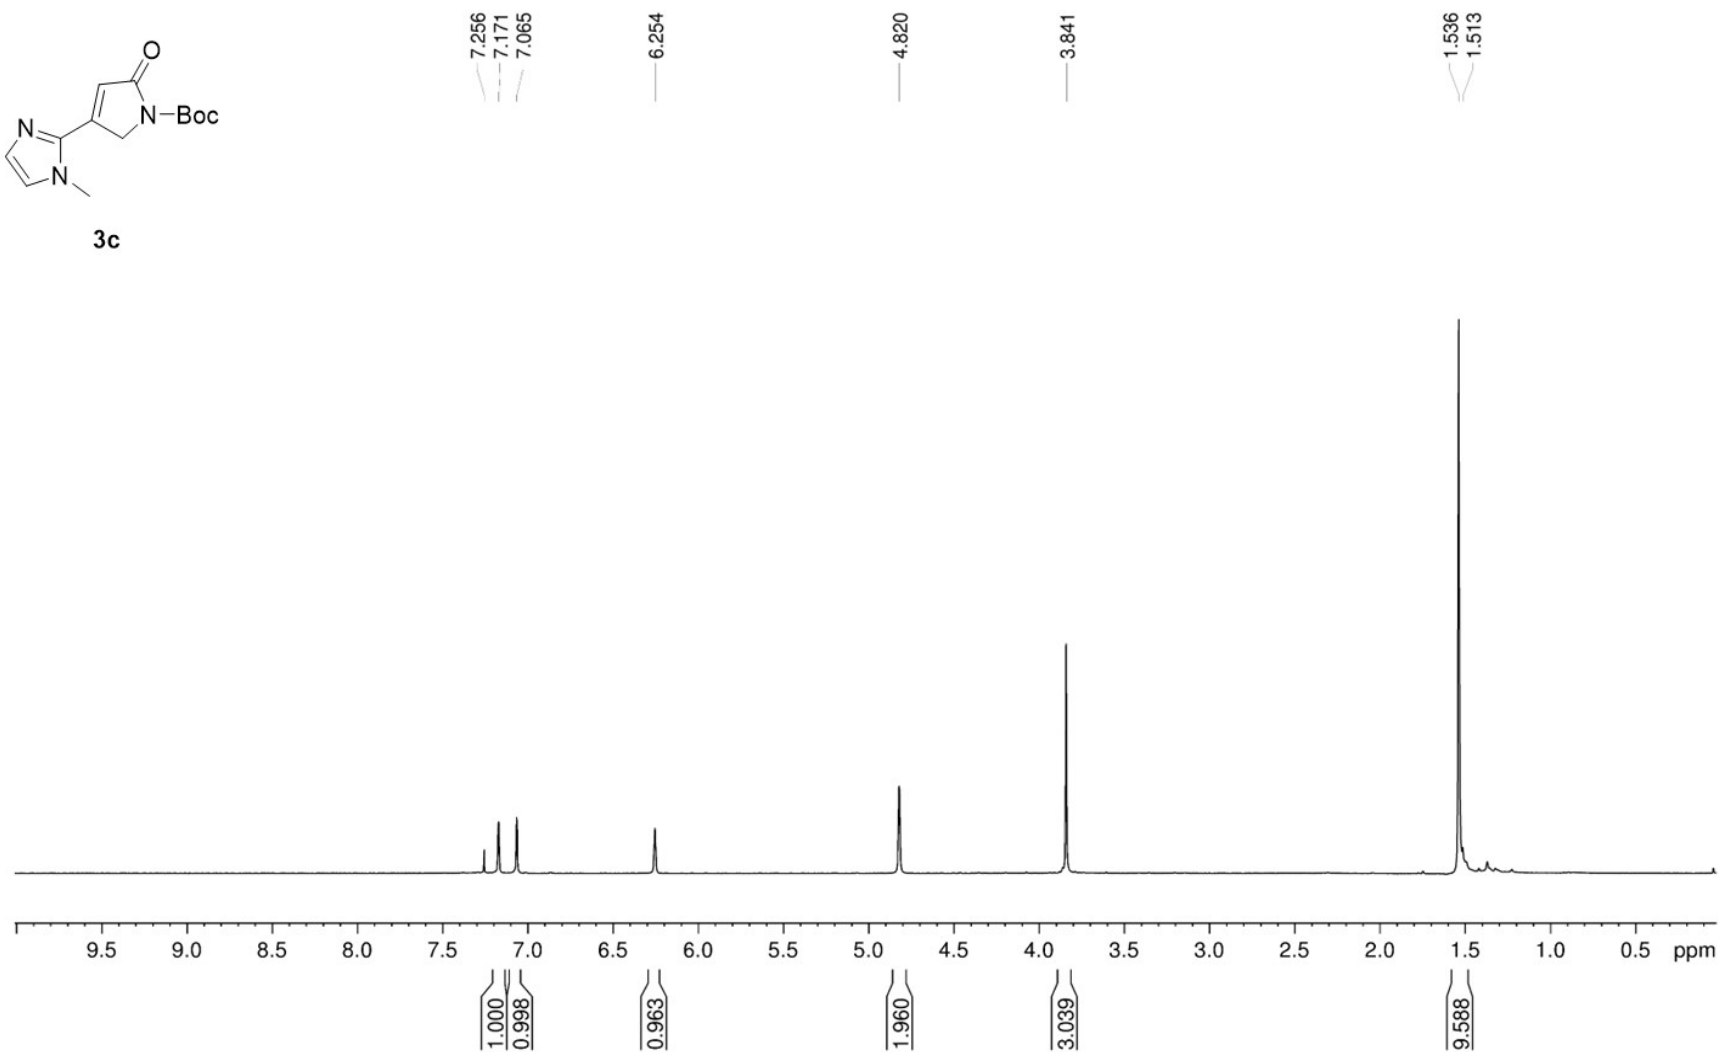

$^1\text{H}$  NMR (300 MHz,  $\text{CDCl}_3$ ) of **3c** (contaminated with trace of tin residue)

YTH2079-B-20250926

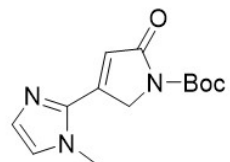

**3c**

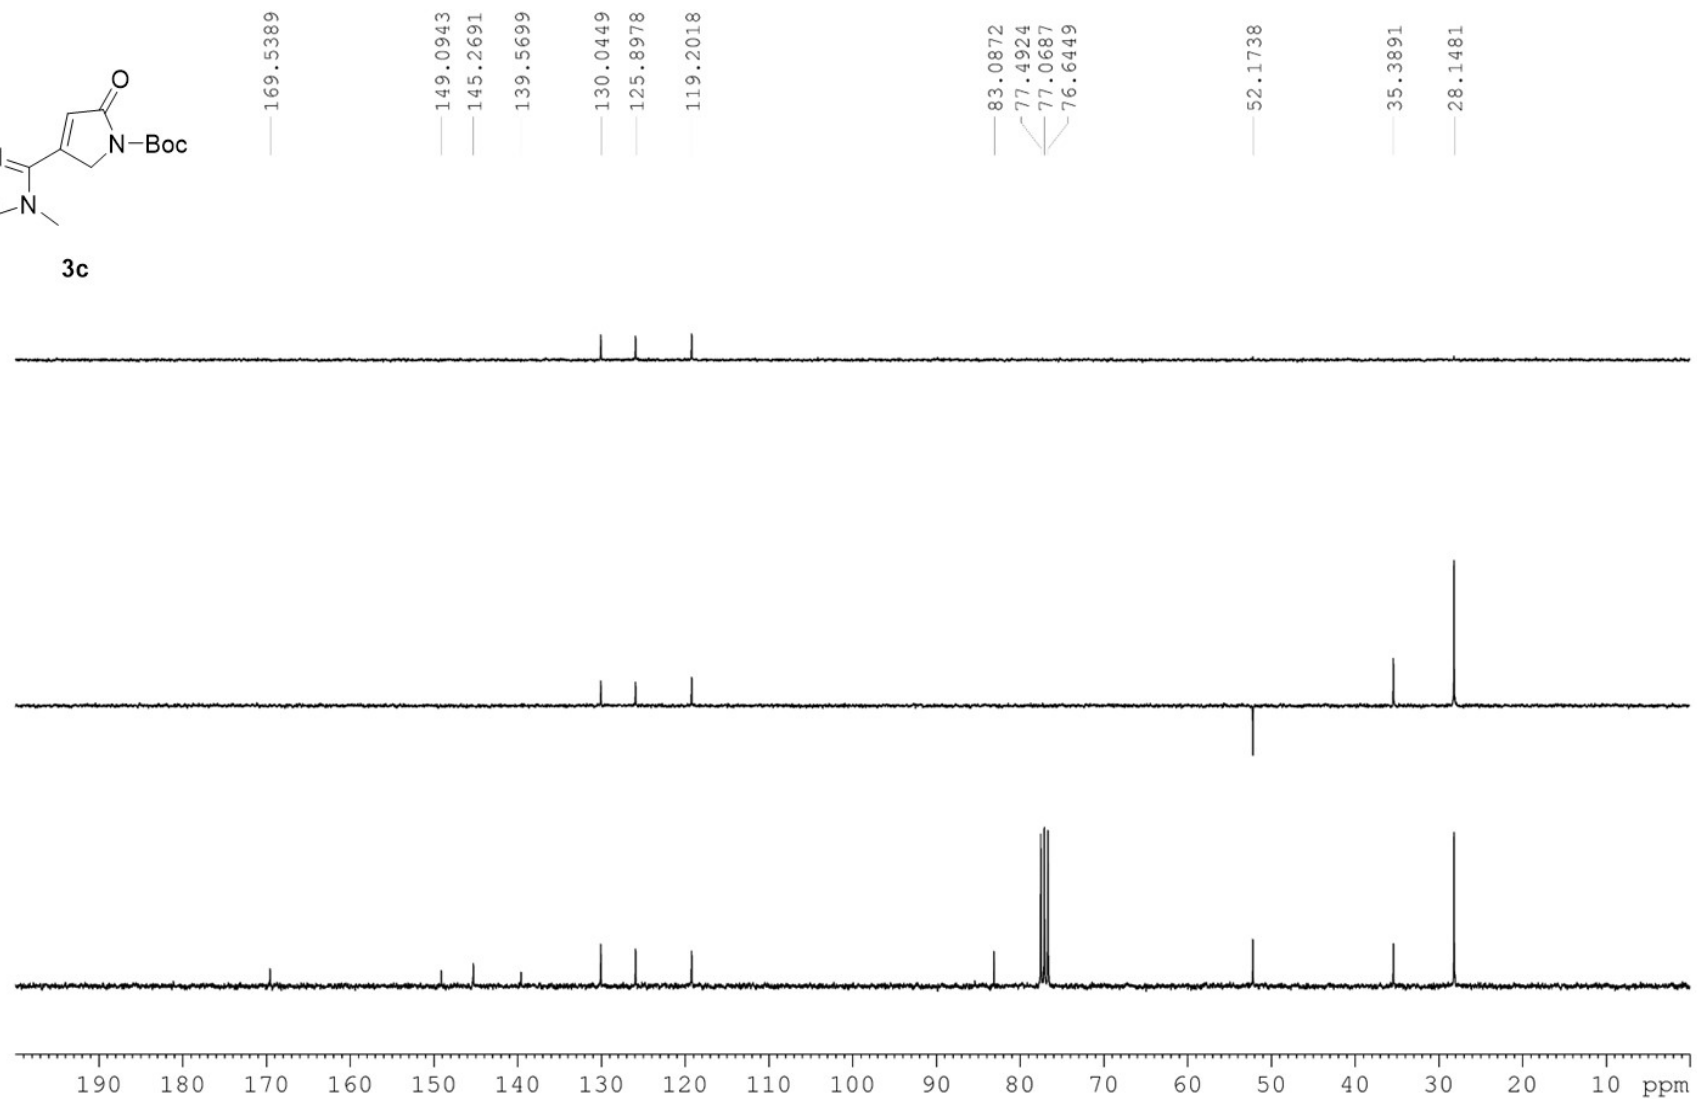

$^{13}\text{C}\{^1\text{H}\}$ -DEPT NMR (75 MHz,  $\text{CDCl}_3$ ) of **3c**

## Elemental Composition Report

### Single Mass Analysis

Tolerance = 500.0 PPM / DBE: min = -10.0, max = 100.0

Element prediction: Off

Number of isotope peaks used for i-FIT = 3

Monoisotopic Mass, Even Electron Ions

323 formula(e) evaluated with 122 results within limits (up to 25 closest results for each mass)

Elements Used:

C: 1-100 H: 1-100 N: 1-10 O: 1-10

YTH2019B

250924FJU33 187 (1.838) Cm (186:189-(174:180+204:209))

1: TOF MS ES+  
5.41e+04

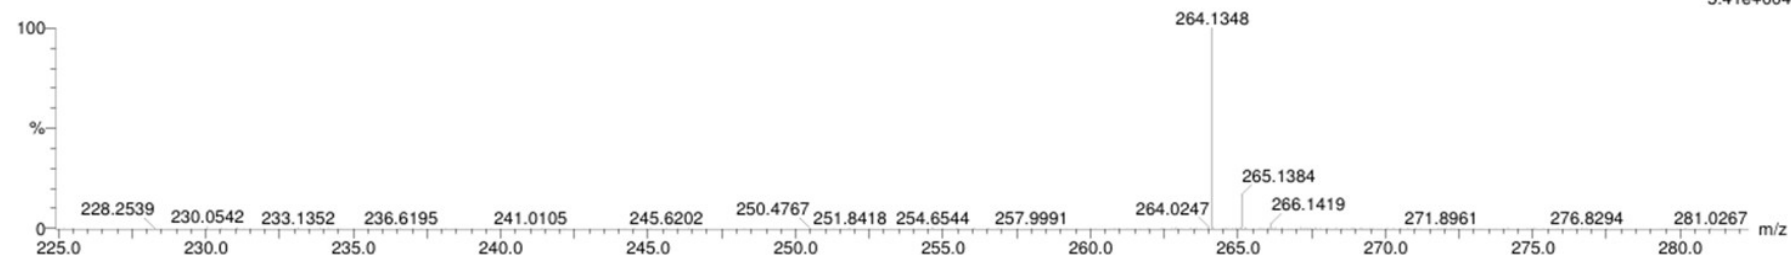

Minimum: 80.00  
Maximum: 100.00

| Mass     | RA     | Calc. Mass | mDa   | PPM   | DBE  | Formula       |
|----------|--------|------------|-------|-------|------|---------------|
| 264.1348 | 100.00 | 264.1348   | 0.0   | 0.0   | 6.5  | C13 H18 N3 O3 |
|          |        | 264.1367   | -1.9  | -7.2  | -6.5 | C H22 N5 O10  |
|          |        | 264.1321   | 2.7   | 10.2  | 7.5  | C9 H14 N9 O   |
|          |        | 264.1380   | -3.2  | -12.1 | -1.5 | C2 H18 N9 O6  |
|          |        | 264.1388   | -4.0  | -15.1 | 10.5 | C18 H18 N O   |
|          |        | 264.1308   | 4.0   | 15.1  | 2.5  | C8 H18 N5 O5  |
|          |        | 264.1295   | 5.3   | 20.1  | -2.5 | C7 H22 N O9   |
|          |        | 264.1407   | -5.9  | -22.3 | -2.5 | C6 H22 N3 O8  |
|          |        | 264.1420   | -7.2  | -27.3 | 2.5  | C7 H18 N7 O4  |
|          |        | 264.1268   | 8.0   | 30.3  | -1.5 | C3 H18 N7 O7  |
|          |        | 264.1447   | -9.9  | -37.5 | 1.5  | C11 H22 N O6  |
|          |        | 264.1460   | -11.2 | -42.4 | 6.5  | C12 H18 N5 O2 |
|          |        | 264.1236   | 11.2  | 42.4  | 6.5  | C14 H18 N O4  |
|          |        | 264.1209   | 13.9  | 52.6  | 7.5  | C10 H14 N7 O2 |
|          |        | 264.1196   | 15.2  | 57.5  | 2.5  | C9 H18 N3 O6  |
|          |        | 264.1519   | -17.1 | -64.7 | -2.5 | C5 H22 N5 O7  |
|          |        | 264.1169   | 17.9  | 67.8  | 3.5  | C5 H14 N9 O4  |
|          |        | 264.1533   | -18.5 | -70.0 | 2.5  | C6 H18 N9 O3  |
|          |        | 264.1155   | 19.3  | 73.1  | -1.5 | C4 H18 N5 O8  |
|          |        | 264.1559   | -21.1 | -79.9 | 1.5  | C10 H22 N3 O5 |
|          |        | 264.1137   | 21.1  | 79.9  | 11.5 | C16 H14 N3 O  |
|          |        | 264.1573   | -22.5 | -85.2 | 6.5  | C11 H18 N7 O  |
|          |        | 264.1097   | 25.1  | 95.0  | 7.5  | C11 H14 N5 O3 |
|          |        | 264.1600   | -25.2 | -95.4 | 5.5  | C15 H22 N O3  |
|          |        | 264.1083   | 26.5  | 100.3 | 2.5  | C10 H18 N O7  |

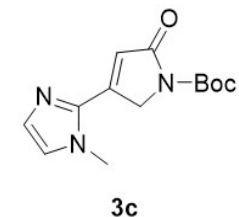

HRMS (ESI<sup>+</sup>) of **3c**

YTH1017-B-20230202

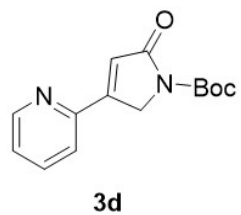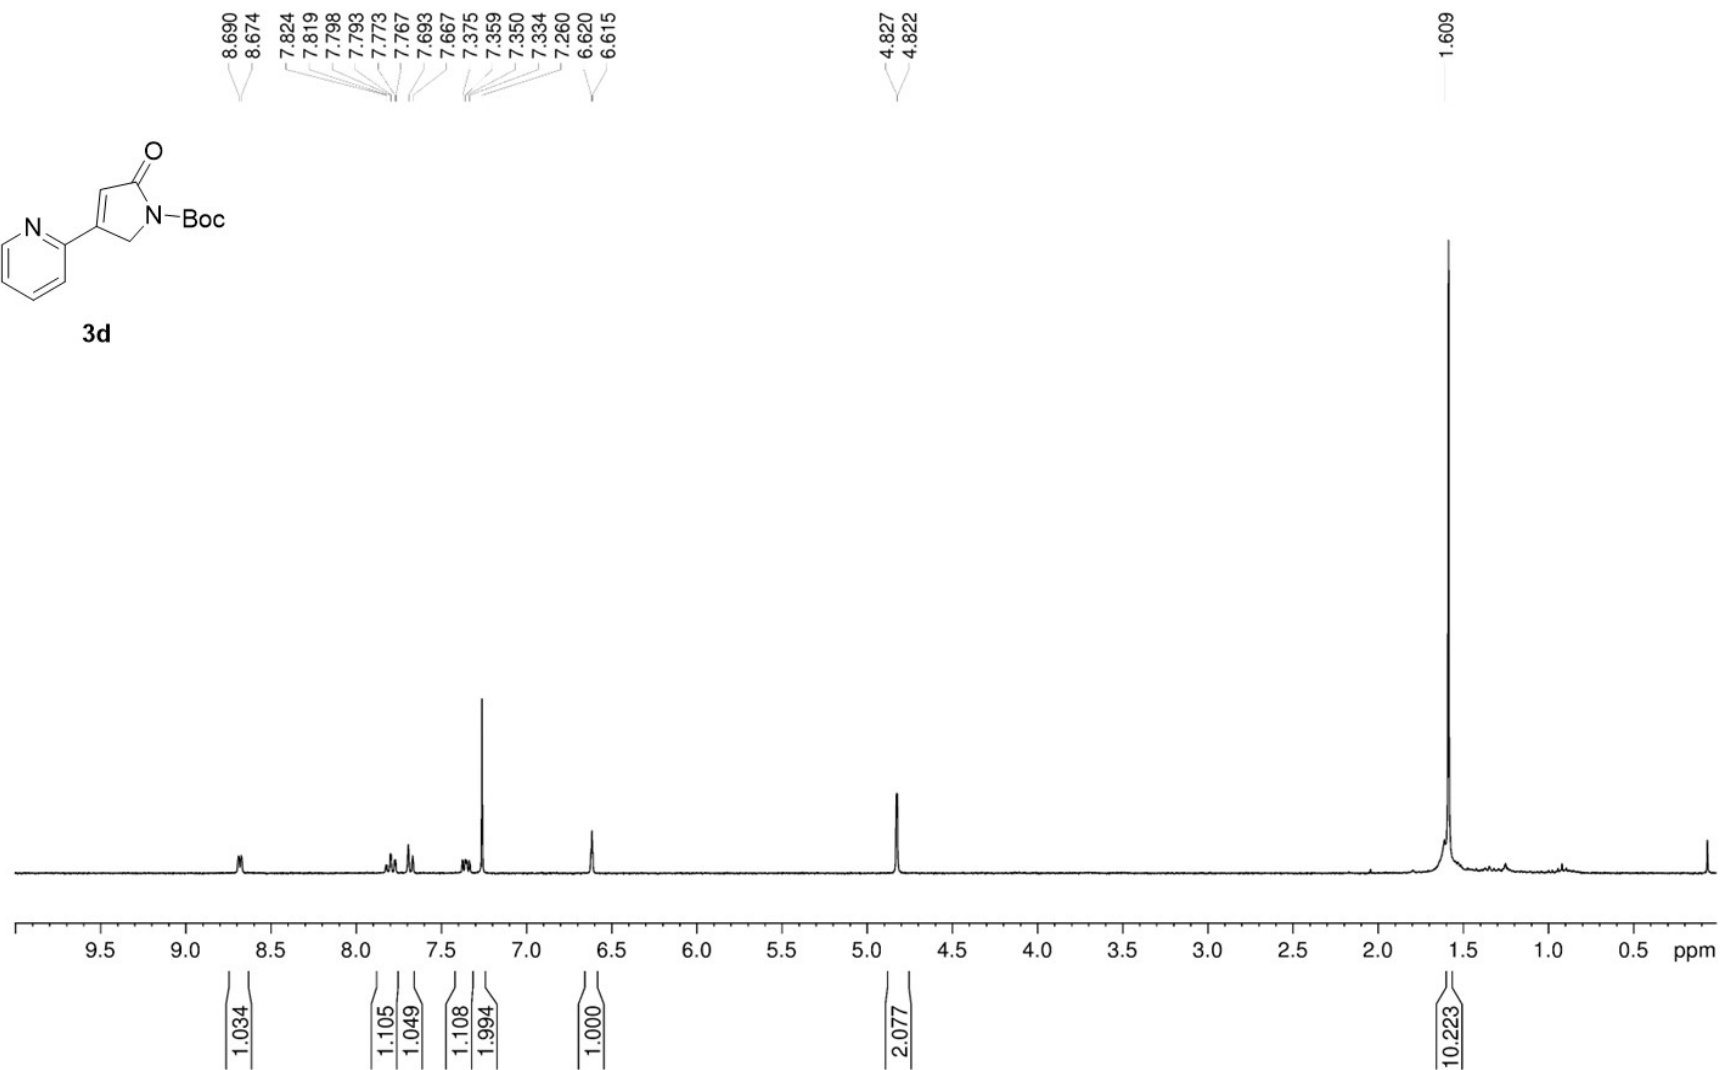

$^1\text{H}$  NMR (300 MHz,  $\text{CDCl}_3$ ) of **3d** (contaminated with tin residue)

YTH1017-B-20230921 (C13)

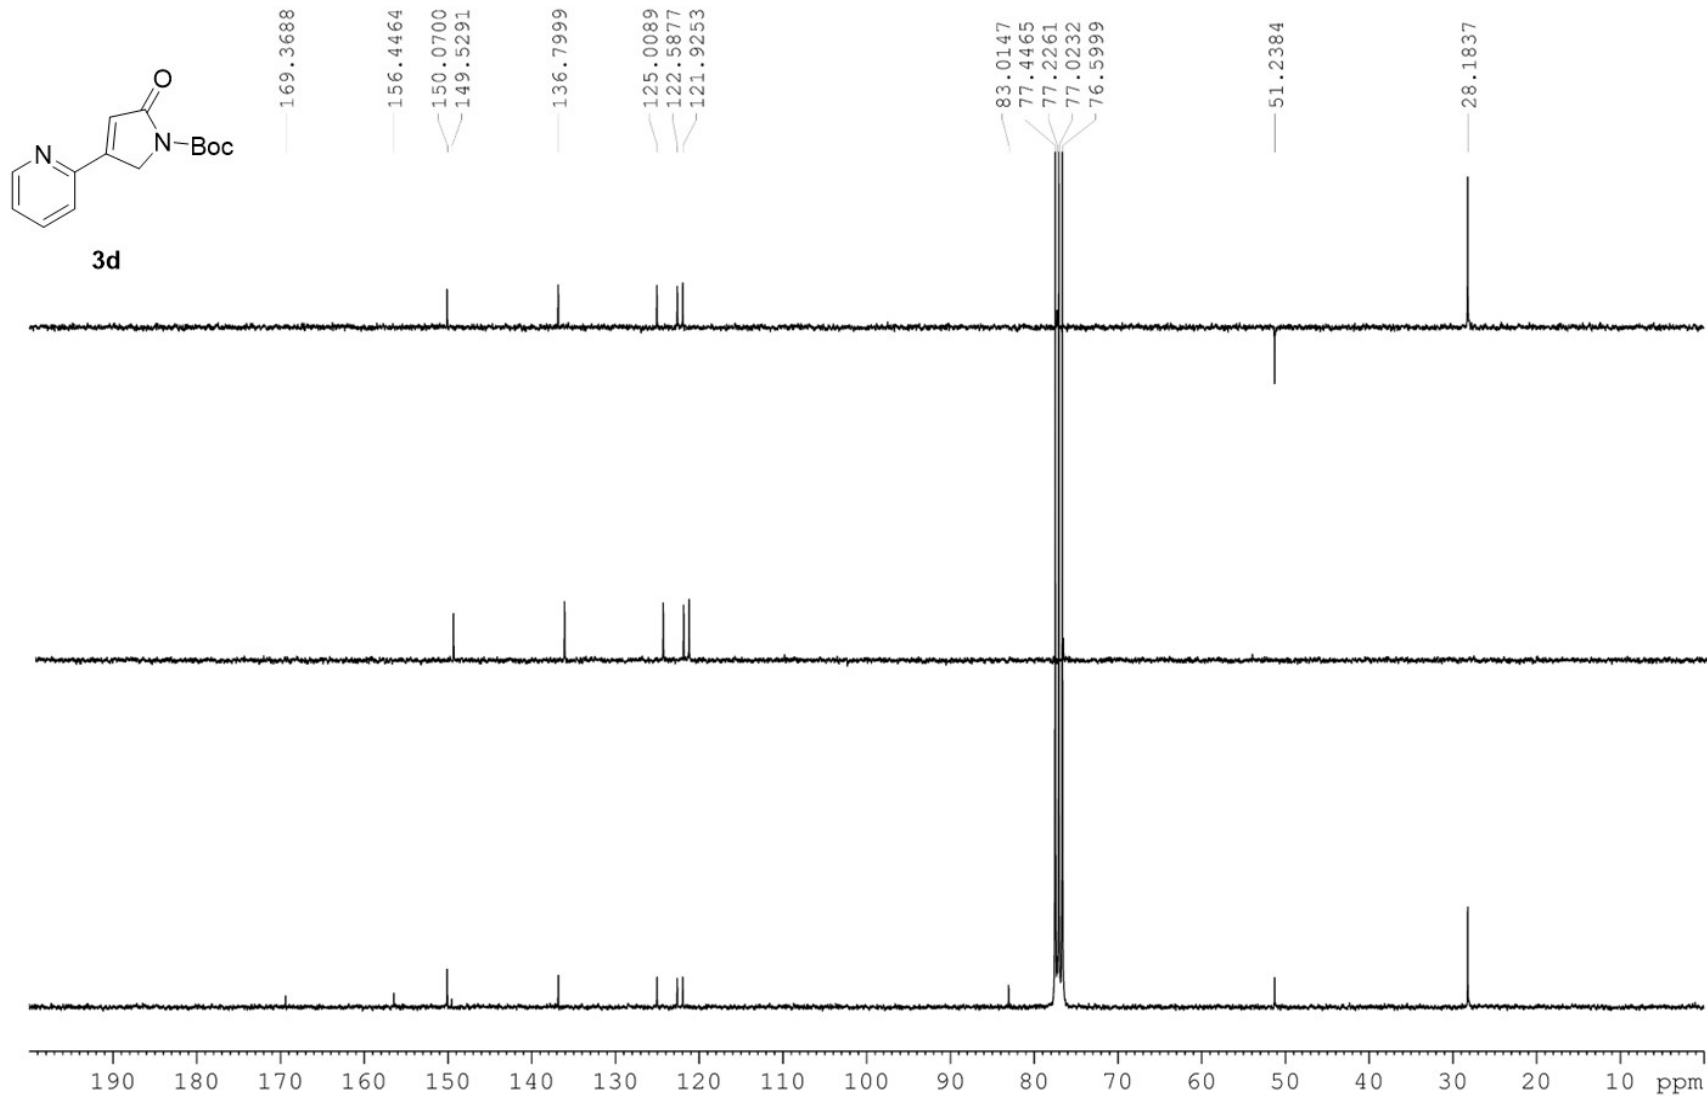

$^{13}\text{C}\{^1\text{H}\}$ -DEPT NMR (75 MHz,  $\text{CDCl}_3$ ) of **3d**

## Elemental Composition Report

Page 1

### Multiple Mass Analysis: 2 mass(es) processed

Tolerance = 500.0 PPM / DBE: min = -10.0, max = 100.0

Element prediction: Off

Number of isotope peaks used for i-FIT = 3

Monoisotopic Mass, Even Electron Ions

326 formula(e) evaluated with 114 results within limits (up to 25 closest results for each mass)

Elements Used:

C: 1-100 H: 1-100 N: 1-10 O: 1-10

YTH1017B

250924FJU38 237 (2.326) Cm (236:241-(221:228+258:265))

1: TOF MS ES+  
8.69e+004

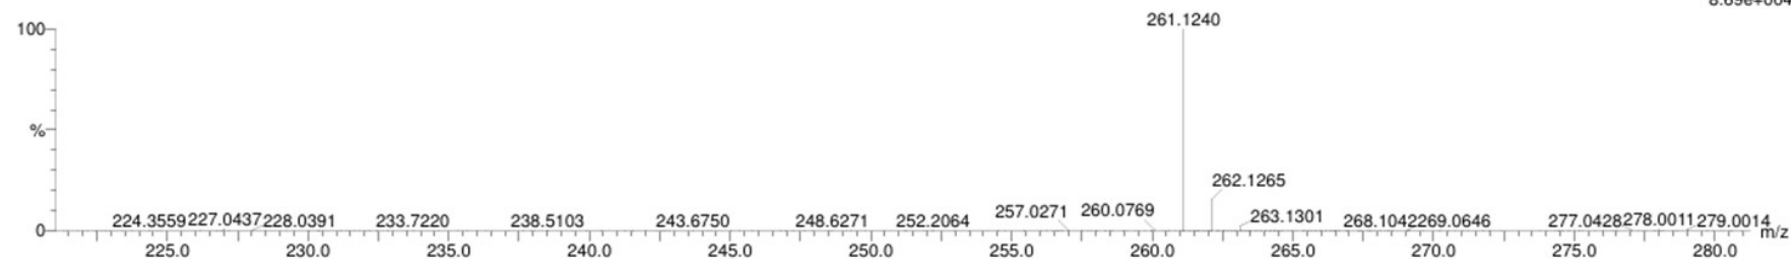

Minimum: 80.00  
Maximum: 100.00

| Mass     | RA     | Calc. Mass | mDa    | PPM  | DBE | Formula       |
|----------|--------|------------|--------|------|-----|---------------|
| 261.1240 | 100.00 |            |        |      |     |               |
| 261.1239 |        | 0.1        | 0.4    | 7.5  |     | C14 H17 N2 O3 |
| 261.1258 |        | -1.8       | -6.9   | -5.5 |     | C2 H21 N4 O10 |
| 261.1212 |        | 2.8        | 10.7   | 8.5  |     | C10 H13 N8 O  |
| 261.1271 |        | -3.1       | -11.9  | -0.5 |     | C3 H17 N8 O6  |
| 261.1199 |        | 4.1        | 15.7   | 3.5  |     | C9 H17 N4 O5  |
| 261.1298 |        | -5.8       | -22.2  | -1.5 |     | C7 H21 N2 O8  |
| 261.1172 |        | 6.8        | 26.0   | 4.5  |     | C5 H13 N10 O3 |
| 261.1311 |        | -7.1       | -27.2  | 3.5  |     | C8 H17 N6 O4  |
| 261.1159 |        | 8.1        | 31.0   | -0.5 |     | C4 H17 N6 O7  |
| 261.1352 |        | -11.2      | -42.9  | 7.5  |     | C13 H17 N4 O2 |
| 261.1370 |        | -13.0      | -49.8  | -5.5 |     | C H21 N6 O9   |
| 261.1100 |        | 14.0       | 53.6   | 8.5  |     | C11 H13 N6 O2 |
| 261.1383 |        | -14.3      | -54.8  | -0.5 |     | C2 H17 N10 O5 |
| 261.1087 |        | 15.3       | 58.6   | 3.5  |     | C10 H17 N2 O6 |
| 261.1410 |        | -17.0      | -65.1  | -1.5 |     | C6 H21 N4 O7  |
| 261.1060 |        | 18.0       | 68.9   | 4.5  |     | C6 H13 N8 O4  |
| 261.1424 |        | -18.4      | -70.5  | 3.5  |     | C7 H17 N8 O3  |
| 261.1046 |        | 19.4       | 74.3   | -0.5 |     | C5 H17 N4 O8  |
| 261.1450 |        | -21.0      | -80.4  | 2.5  |     | C11 H21 N2 O5 |
| 261.1028 |        | 21.2       | 81.2   | 12.5 |     | C17 H13 N2 O  |
| 261.1020 |        | 22.0       | 84.3   | 0.5  |     | C H13 N10 O6  |
| 261.1464 |        | -22.4      | -85.8  | 7.5  |     | C12 H17 N6 O  |
| 261.0988 |        | 25.2       | 96.5   | 8.5  |     | C12 H13 N4 O3 |
| 261.1509 |        | -26.9      | -103.0 | -6.5 |     | C4 H25 N2 O10 |
| 261.0961 |        | 27.9       | 106.8  | 9.5  |     | C8 H9 N10 O   |

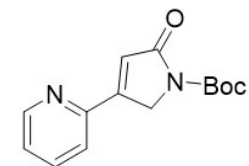

3d

HRMS (ESI<sup>+</sup>) of 3d

YTH3172-D1-20251106

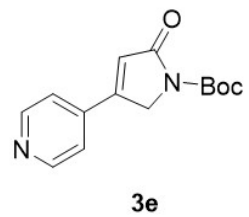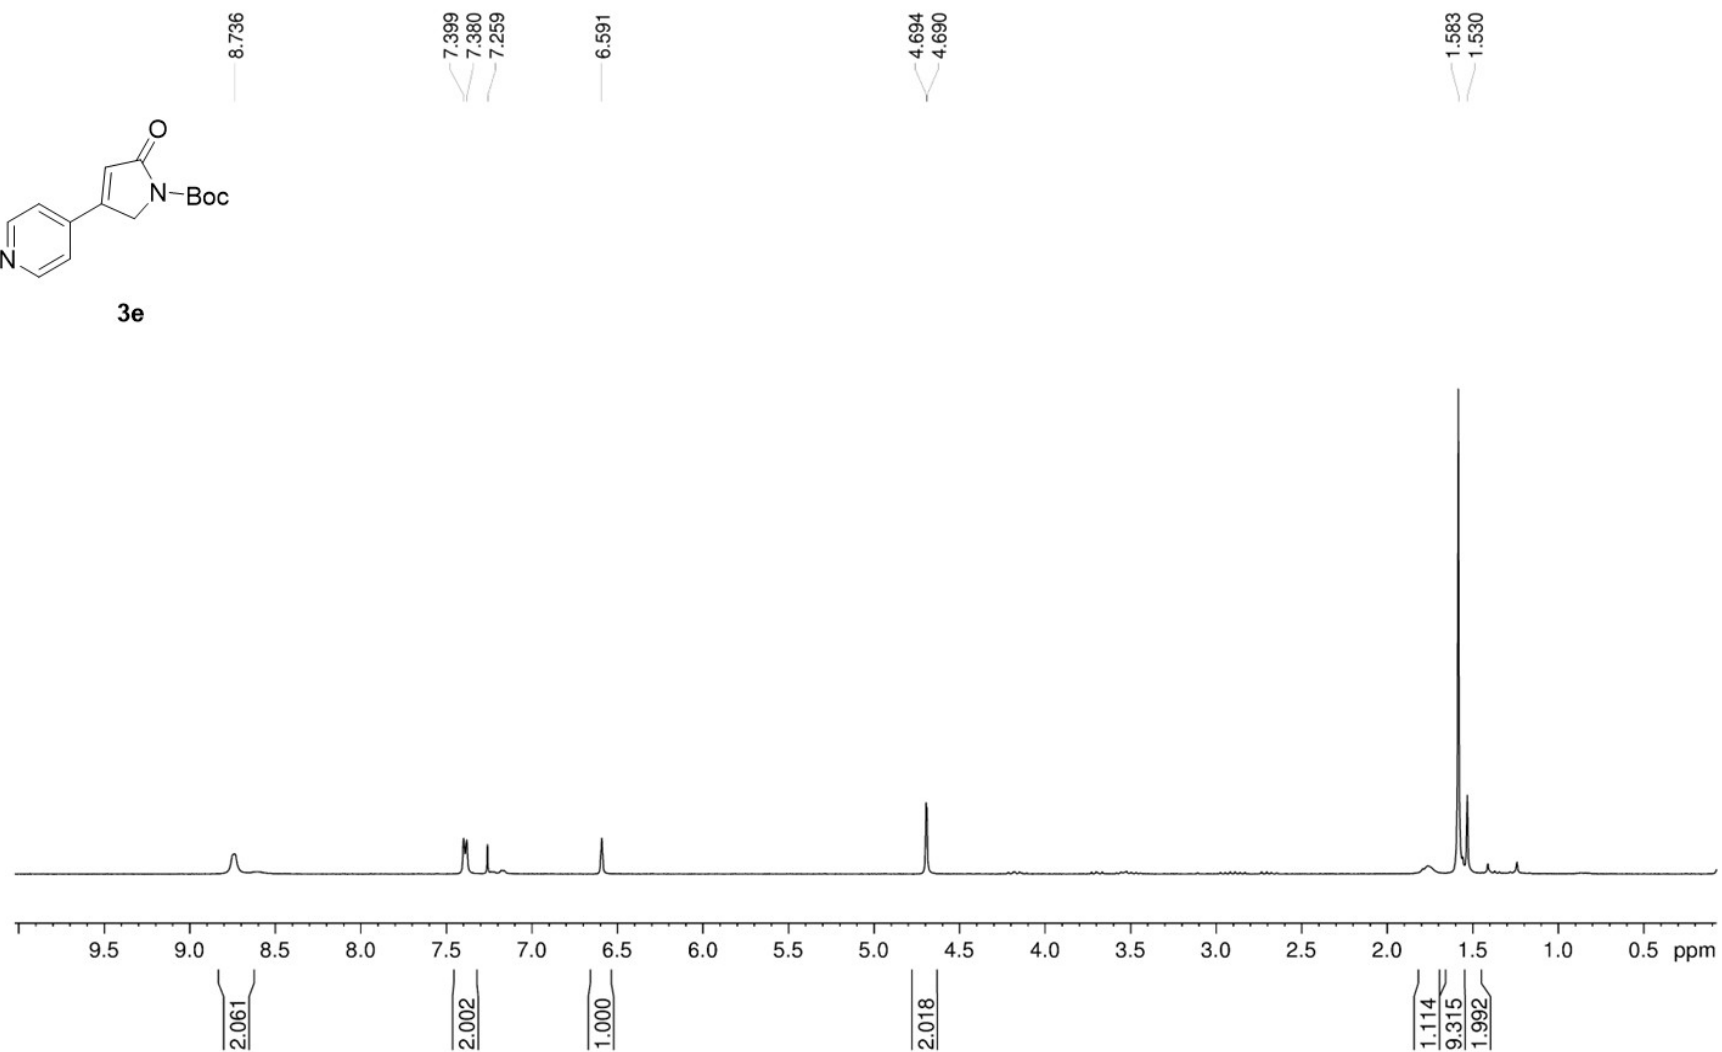

$^1\text{H}$  NMR (300 MHz,  $\text{CDCl}_3$ ) of **3e** (contaminated with tin residue)

YTH3172-D1-20251106

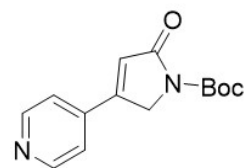

**3e**

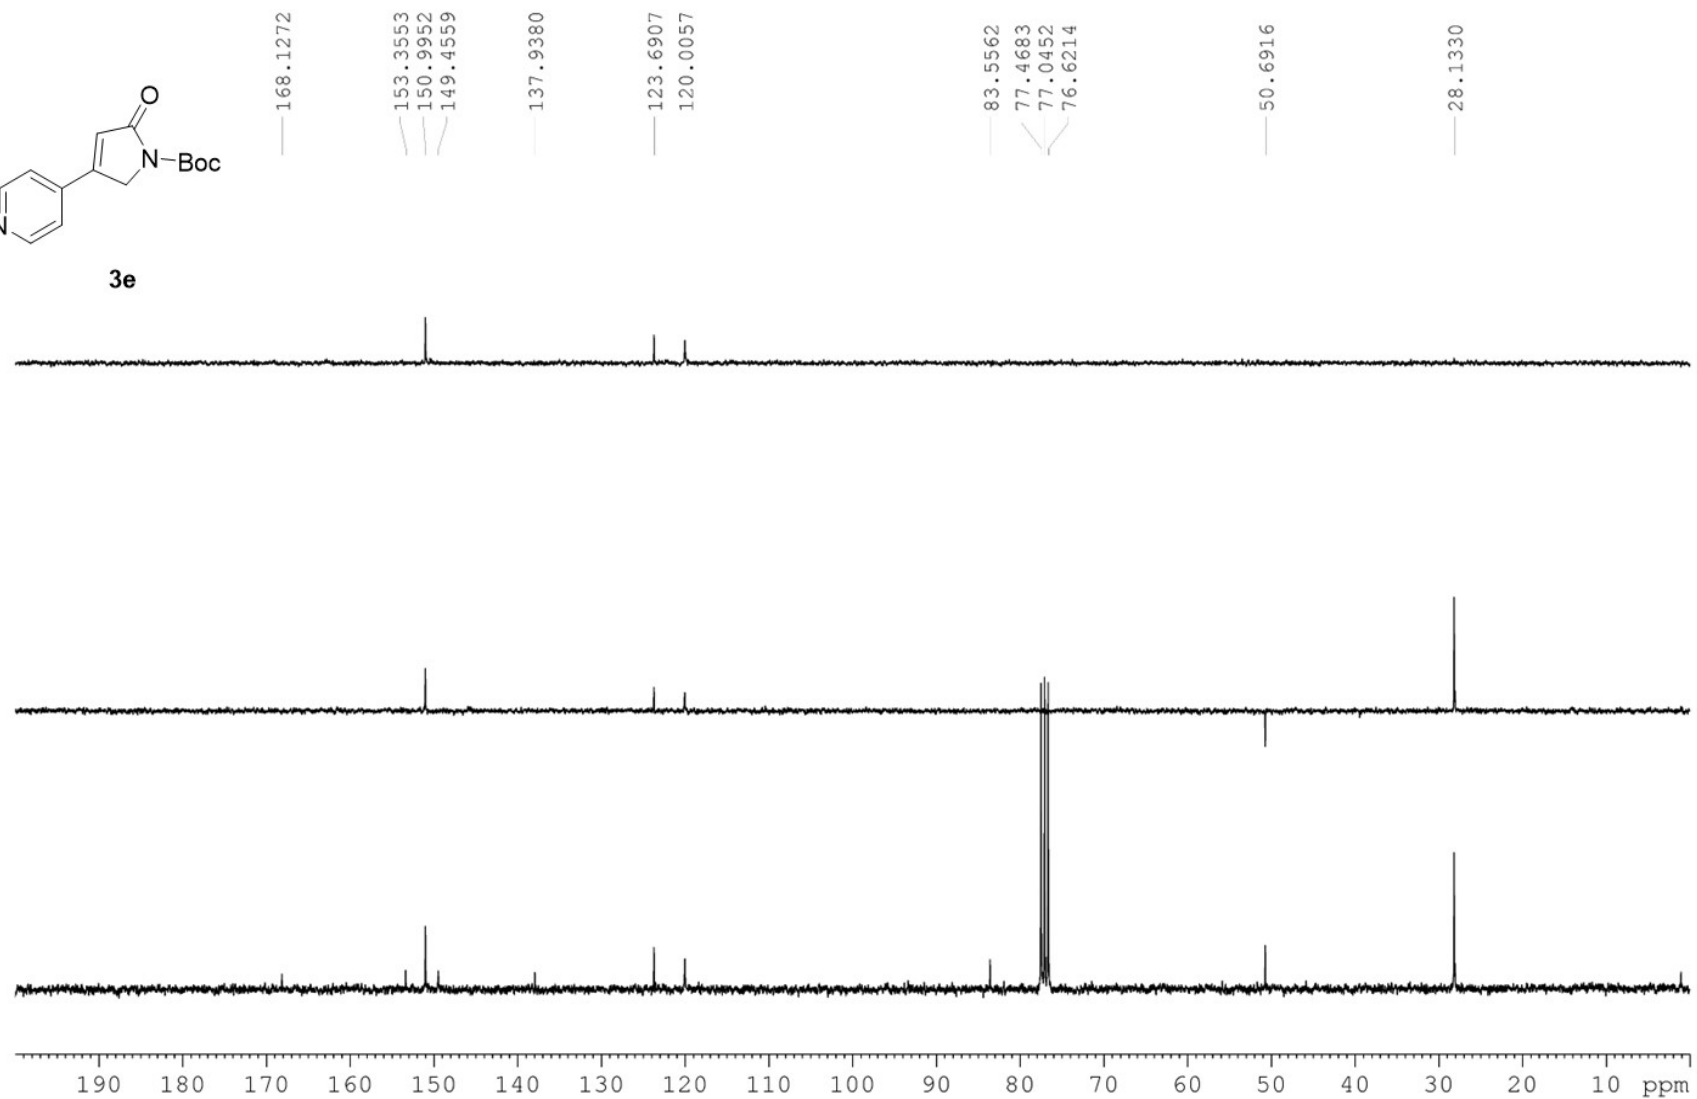

$^{13}\text{C}\{^1\text{H}\}$ -DEPT NMR (75 MHz,  $\text{CDCl}_3$ ) of **3e**

## Elemental Composition Report

### Single Mass Analysis

Tolerance = 500.0 PPM / DBE: min = -10.0, max = 100.0

Element prediction: Off

Number of isotope peaks used for i-FIT = 3

Monoisotopic Mass, Even Electron Ions

326 formula(e) evaluated with 113 results within limits (up to 25 closest results for each mass)

Elements Used:

C: 1-100 H: 1-100 N: 1-10 O: 1-10

YTH2019B (YTH3055B)

250924FJU41 197 (1.924) Cm (196:198-(179:186+217:225))

1: TOF MS ES+  
1.94e+005

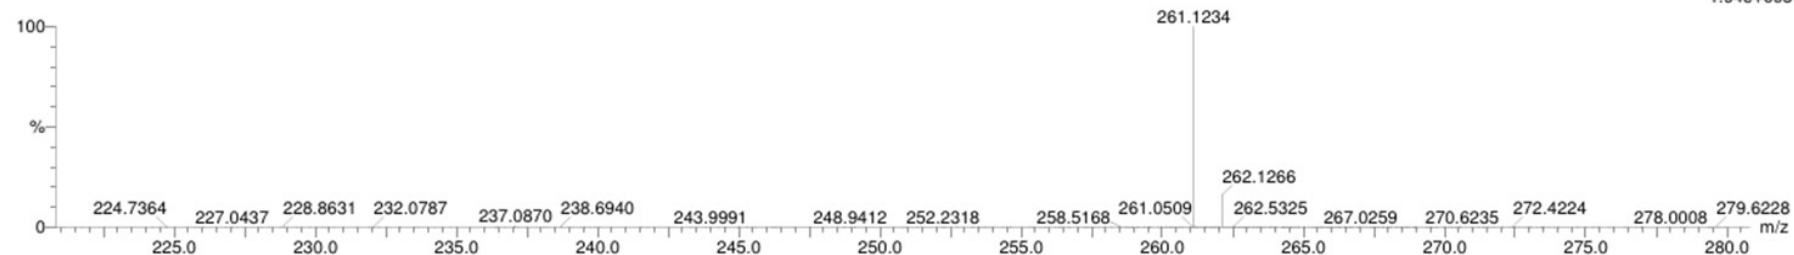

Minimum: 80.00  
Maximum: 100.00

| Mass     | RA     | Calc. Mass | mDa   | PPM    | DBE  | Formula       |
|----------|--------|------------|-------|--------|------|---------------|
| 261.1234 | 100.00 | 261.1239   | -0.5  | -1.9   | 7.5  | C14 H17 N2 O3 |
|          |        | 261.1212   | 2.2   | 8.4    | 8.5  | C10 H13 N8 O  |
|          |        | 261.1258   | -2.4  | -9.2   | -5.5 | C2 H21 N4 O10 |
|          |        | 261.1199   | 3.5   | 13.4   | 3.5  | C9 H17 N4 O5  |
|          |        | 261.1271   | -3.7  | -14.2  | -0.5 | C3 H17 N8 O6  |
|          |        | 261.1172   | 6.2   | 23.7   | 4.5  | C5 H13 N10 O3 |
|          |        | 261.1298   | -6.4  | -24.5  | -1.5 | C7 H21 N2 O8  |
|          |        | 261.1159   | 7.5   | 28.7   | -0.5 | C4 H17 N6 O7  |
|          |        | 261.1311   | -7.7  | -29.5  | 3.5  | C8 H17 N6 O4  |
|          |        | 261.1352   | -11.8 | -45.2  | 7.5  | C13 H17 N4 O2 |
|          |        | 261.1100   | 13.4  | 51.3   | 8.5  | C11 H13 N6 O2 |
|          |        | 261.1370   | -13.6 | -52.1  | -5.5 | C H21 N6 O9   |
|          |        | 261.1087   | 14.7  | 56.3   | 3.5  | C10 H17 N2 O6 |
|          |        | 261.1383   | -14.9 | -57.1  | -0.5 | C2 H17 N10 O5 |
|          |        | 261.1060   | 17.4  | 66.6   | 4.5  | C6 H13 N8 O4  |
|          |        | 261.1410   | -17.6 | -67.4  | -1.5 | C6 H21 N4 O7  |
|          |        | 261.1046   | 18.8  | 72.0   | -0.5 | C5 H17 N4 O8  |
|          |        | 261.1424   | -19.0 | -72.8  | 3.5  | C7 H17 N8 O3  |
|          |        | 261.1028   | 20.6  | 78.9   | 12.5 | C17 H13 N2 O  |
|          |        | 261.1020   | 21.4  | 82.0   | 0.5  | C H13 N10 O6  |
|          |        | 261.1450   | -21.6 | -82.7  | 2.5  | C11 H21 N2 O5 |
|          |        | 261.1464   | -23.0 | -88.1  | 7.5  | C12 H17 N6 O  |
|          |        | 261.0988   | 24.6  | 94.2   | 8.5  | C12 H13 N4 O3 |
|          |        | 261.0961   | 27.3  | 104.5  | 9.5  | C8 H9 N10 O   |
|          |        | 261.1509   | -27.5 | -105.3 | -6.5 | C4 H25 N2 O10 |

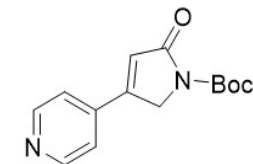

3e

HRMS (ESI<sup>+</sup>) of 3e

YTH2052-B3-20231004(C13)

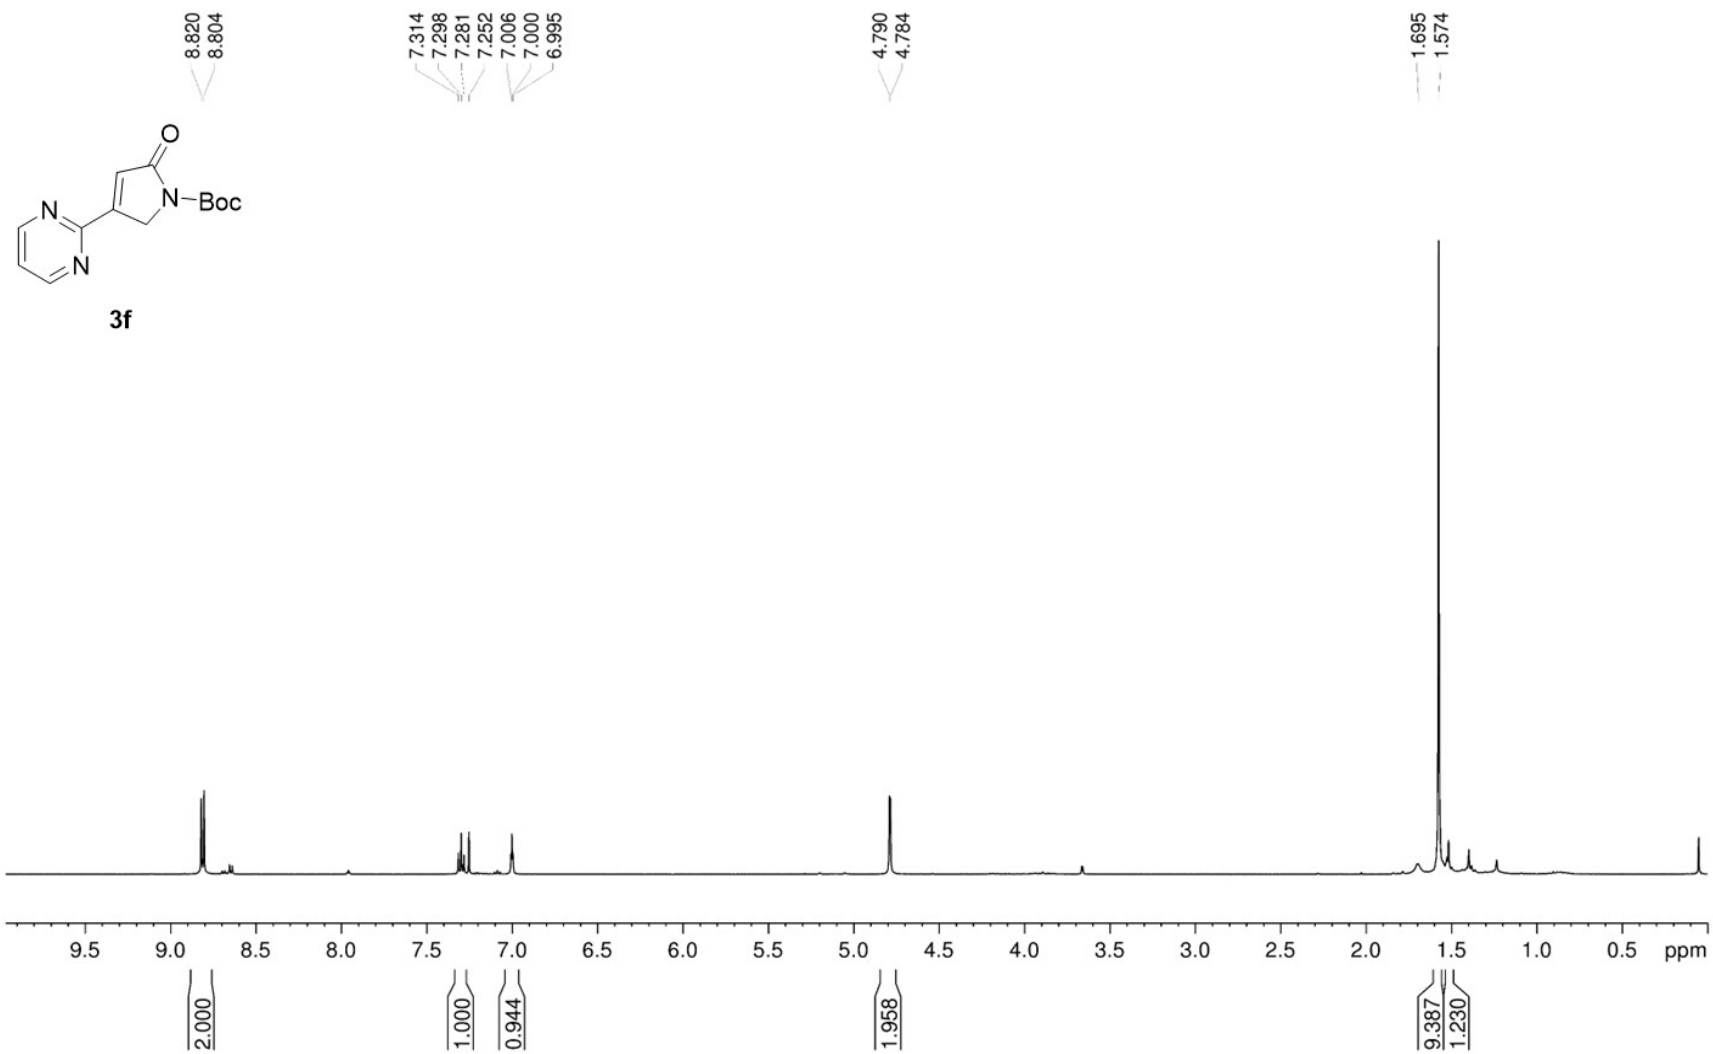

<sup>1</sup>H NMR (300 MHz, CDCl<sub>3</sub>) of **3f** (contaminated with tin residue)

YTH2052-B3-20231004 (C13)

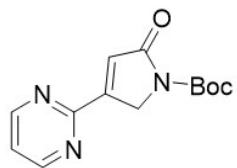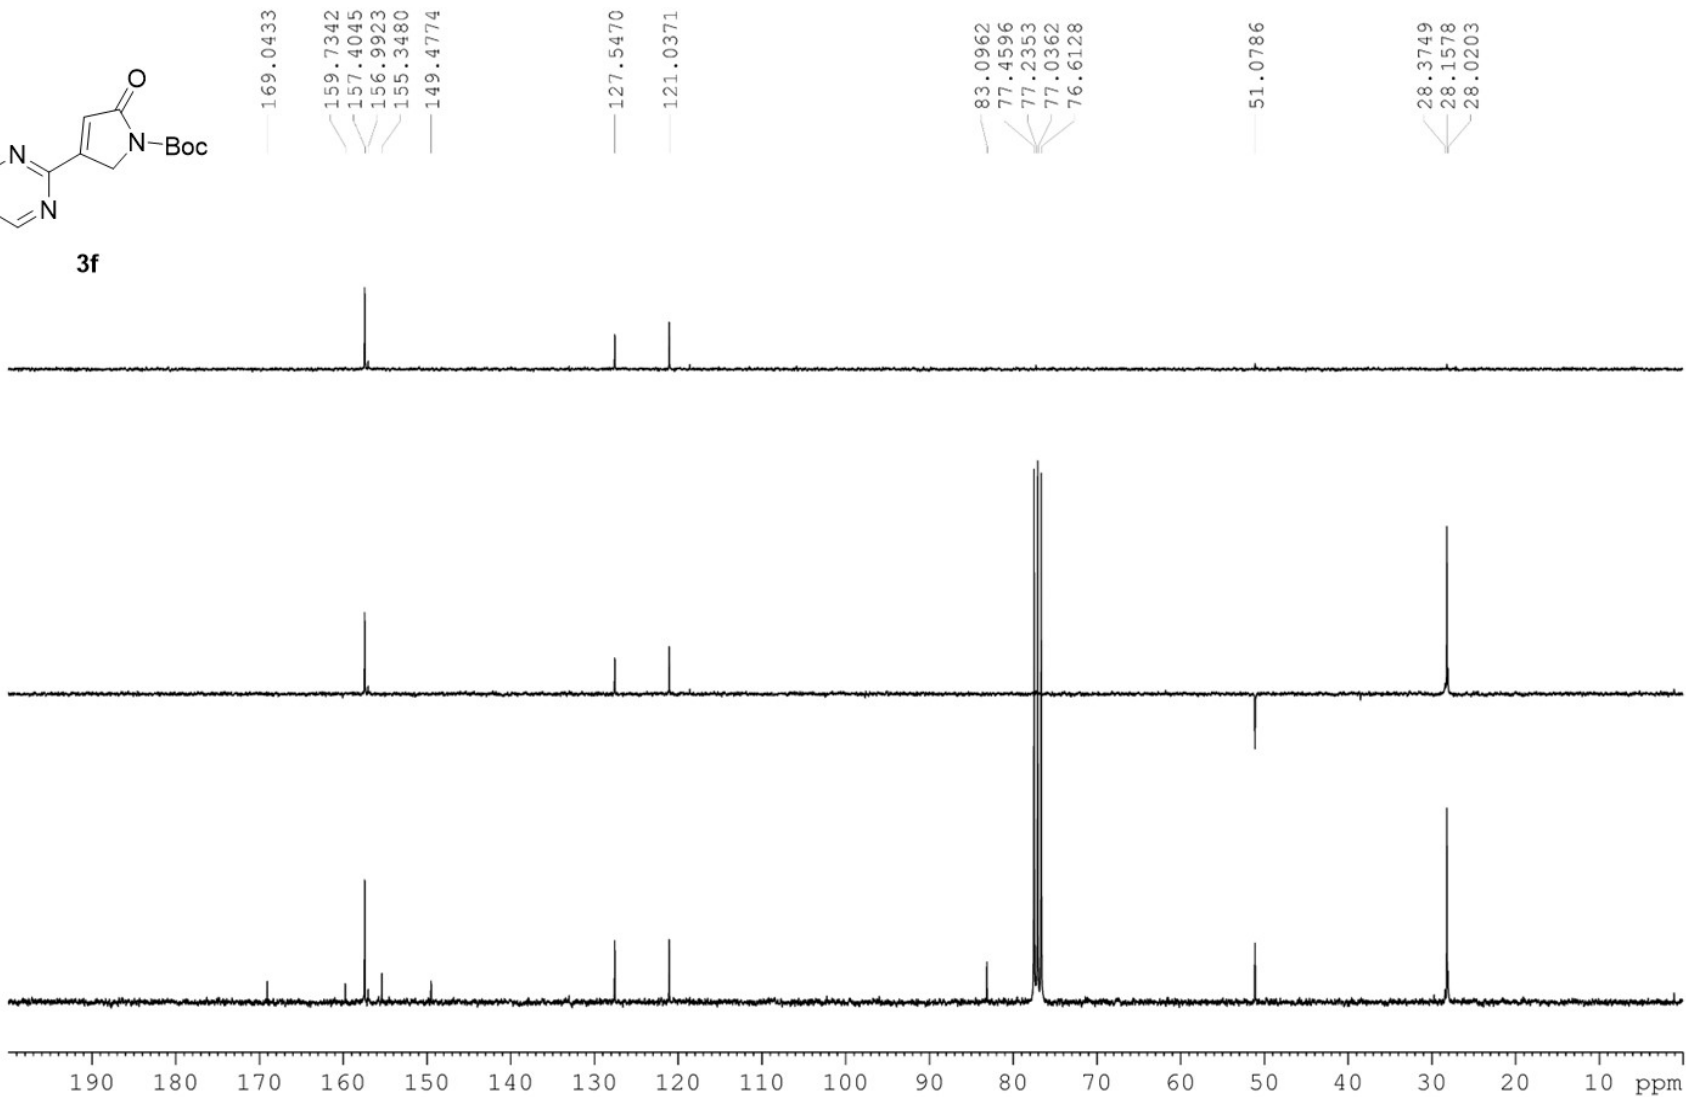

$^{13}\text{C}\{^1\text{H}\}$ -DEPT NMR (75 MHz,  $\text{CDCl}_3$ ) of **3f**

## Elemental Composition Report

Page 1

### Single Mass Analysis

Tolerance = 500.0 PPM / DBE: min = -10.0, max = 100.0

Element prediction: Off

Number of isotope peaks used for i-FIT = 3

Monoisotopic Mass, Even Electron Ions

319 formula(e) evaluated with 114 results within limits (up to 25 closest results for each mass)

Elements Used:

C: 1-100 H: 1-100 N: 1-10 O: 1-10

YTH2052B

250924FJU42 223 (2.187) Cm (221:231-(202:210+245:252))

1: TOF MS ES+  
1.14e+004

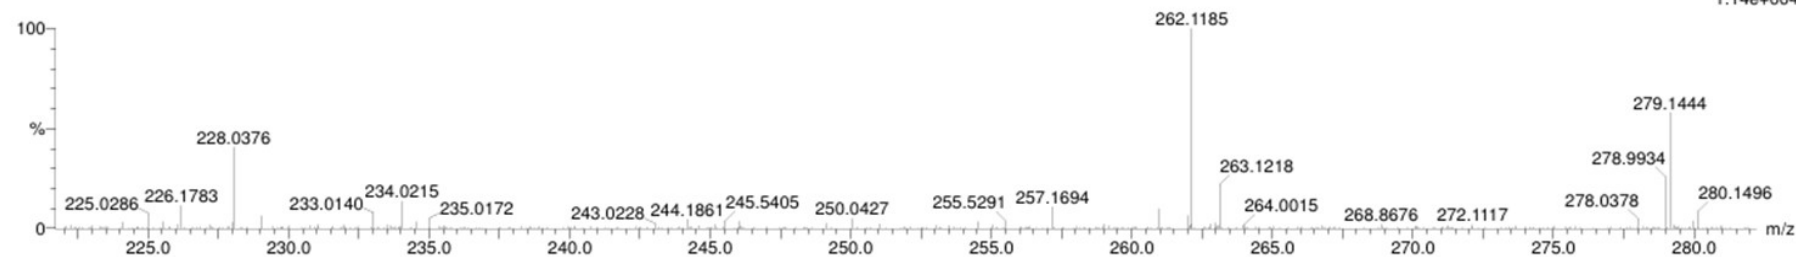

Minimum: 80.00  
Maximum: 100.00

| Mass     | RA     | Calc. Mass | mDa   | PPM   | DBE  | Formula       |
|----------|--------|------------|-------|-------|------|---------------|
| 262.1185 | 100.00 | 262.1192   | -0.7  | -2.7  | 7.5  | C13 H16 N3 O3 |
|          |        | 262.1165   | 2.0   | 7.6   | 8.5  | C9 H12 N9 O   |
|          |        | 262.1210   | -2.5  | -9.5  | -5.5 | C H20 N5 O10  |
|          |        | 262.1151   | 3.4   | 13.0  | 3.5  | C8 H16 N5 O5  |
|          |        | 262.1224   | -3.9  | -14.9 | -0.5 | C2 H16 N9 O6  |
|          |        | 262.1232   | -4.7  | -17.9 | 11.5 | C18 H16 N O   |
|          |        | 262.1138   | 4.7   | 17.9  | -1.5 | C7 H20 N O9   |
|          |        | 262.1250   | -6.5  | -24.8 | -1.5 | C6 H20 N3 O8  |
|          |        | 262.1111   | 7.4   | 28.2  | -0.5 | C3 H16 N7 O7  |
|          |        | 262.1264   | -7.9  | -30.1 | 3.5  | C7 H16 N7 O4  |
|          |        | 262.1079   | 10.6  | 40.4  | 7.5  | C14 H16 N O4  |
|          |        | 262.1291   | -10.6 | -40.4 | 2.5  | C11 H20 N O6  |
|          |        | 262.1304   | -11.9 | -45.4 | 7.5  | C12 H16 N5 O2 |
|          |        | 262.1052   | 13.3  | 50.7  | 8.5  | C10 H12 N7 O2 |
|          |        | 262.1039   | 14.6  | 55.7  | 3.5  | C9 H16 N3 O6  |
|          |        | 262.1012   | 17.3  | 66.0  | 4.5  | C5 H12 N9 O4  |
|          |        | 262.1363   | -17.8 | -67.9 | -1.5 | C5 H20 N5 O7  |
|          |        | 262.0999   | 18.6  | 71.0  | -0.5 | C4 H16 N5 O8  |
|          |        | 262.1376   | -19.1 | -72.9 | 3.5  | C6 H16 N9 O3  |
|          |        | 262.0980   | 20.5  | 78.2  | 12.5 | C16 H12 N3 O  |
|          |        | 262.1403   | -21.8 | -83.2 | 2.5  | C10 H20 N3 O5 |
|          |        | 262.1416   | -23.1 | -88.1 | 7.5  | C11 H16 N7 O  |
|          |        | 262.0940   | 24.5  | 93.5  | 8.5  | C11 H12 N5 O3 |
|          |        | 262.0927   | 25.8  | 98.4  | 3.5  | C10 H16 N O7  |
|          |        | 262.1443   | -25.8 | -98.4 | 6.5  | C15 H20 N O3  |

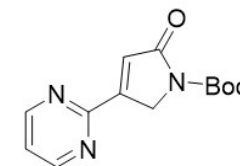

**3f**

HRMS (ESI<sup>+</sup>) of **3f**

YTH3169-B-20251023

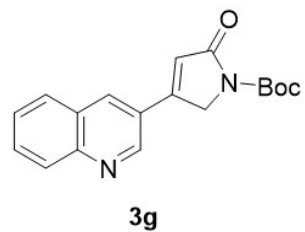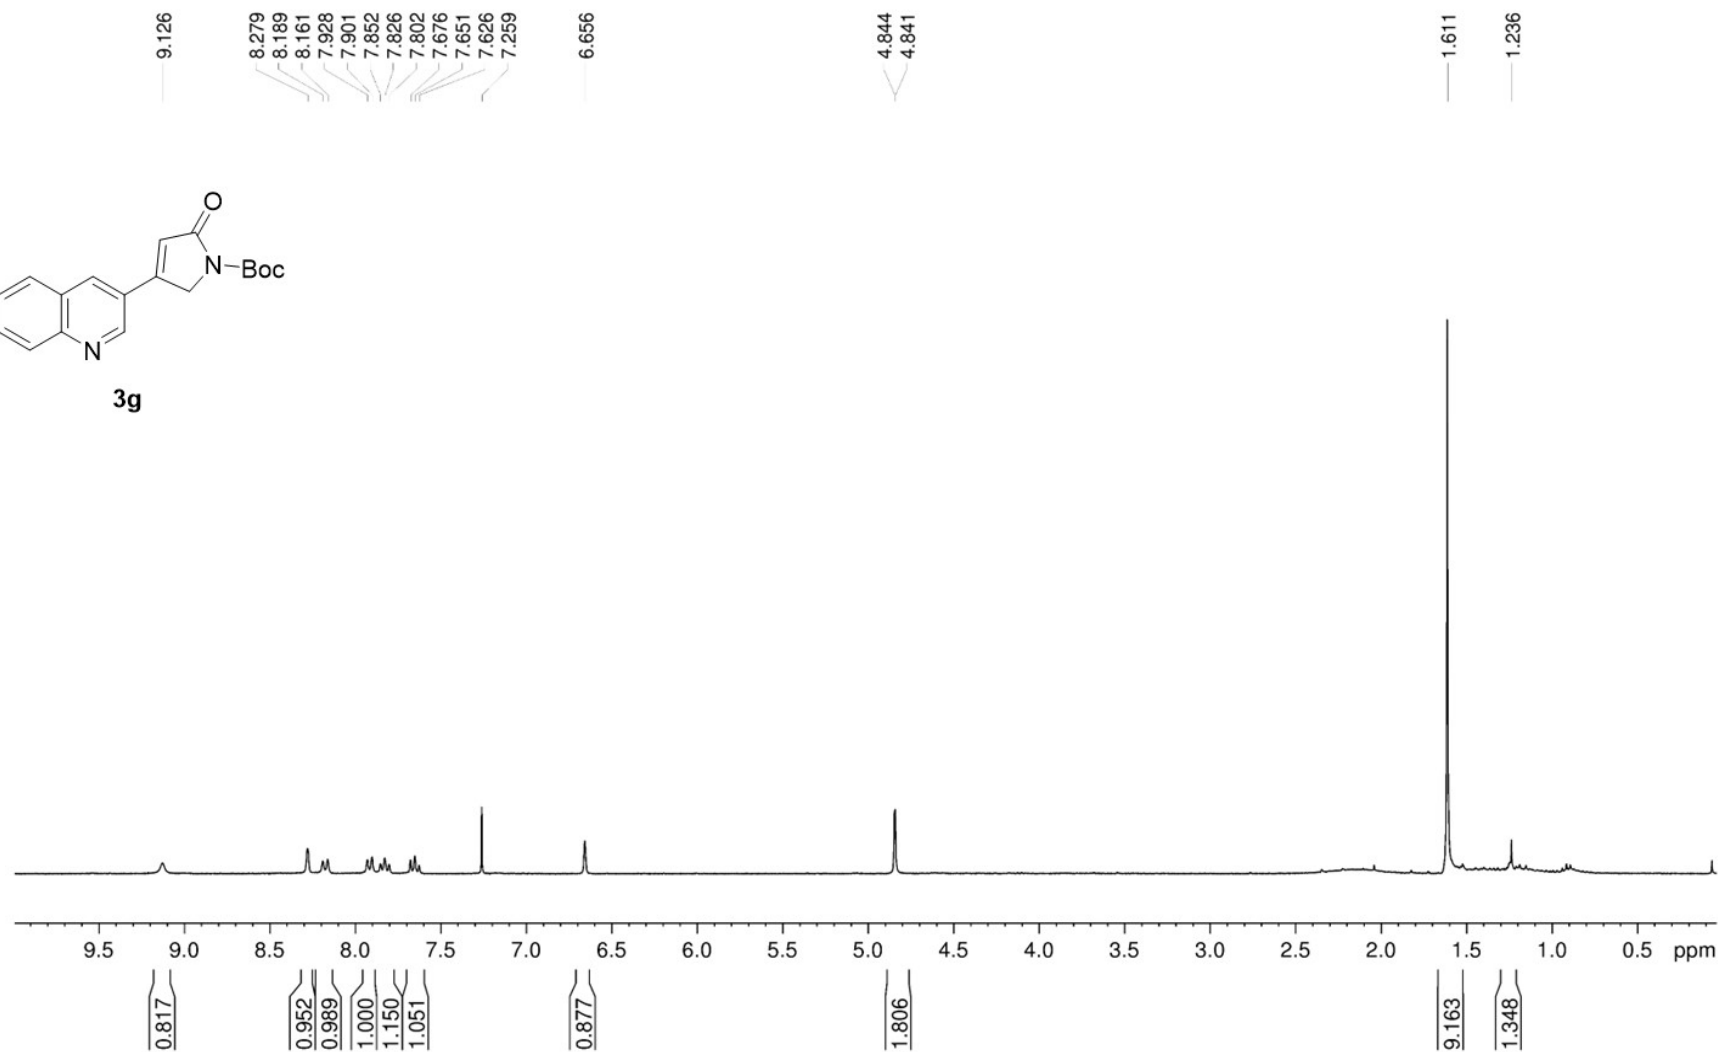

$^1\text{H}$  NMR (300 MHz,  $\text{CDCl}_3$ ) of **3g** (contaminated with tin residue)

YTH3171-B-20251030

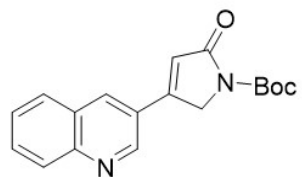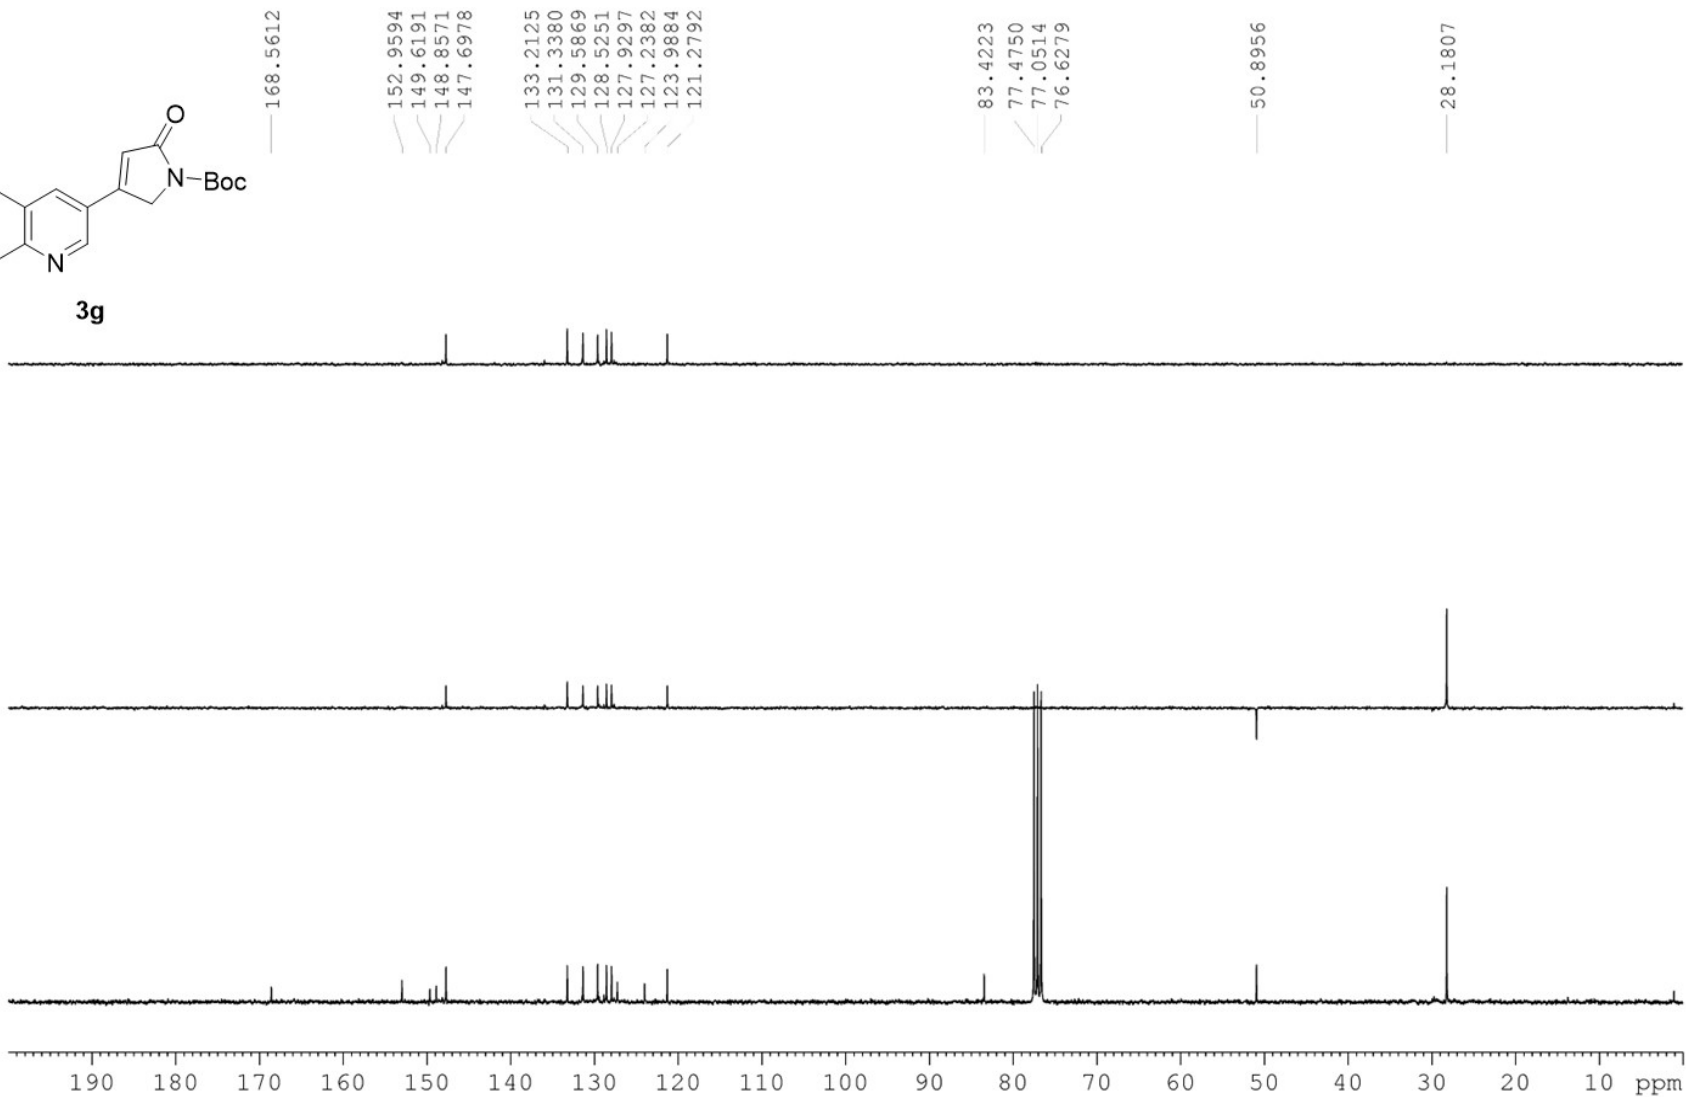

$^{13}\text{C}\{^1\text{H}\}$ -DEPT NMR (75 MHz,  $\text{CDCl}_3$ ) of **3g**

20251127\_YTH3169B#11 RT: 0.08 AV: 1 NL: 1.65E8  
T: FTMS + p ESI Full ms [120.0000-750.0000]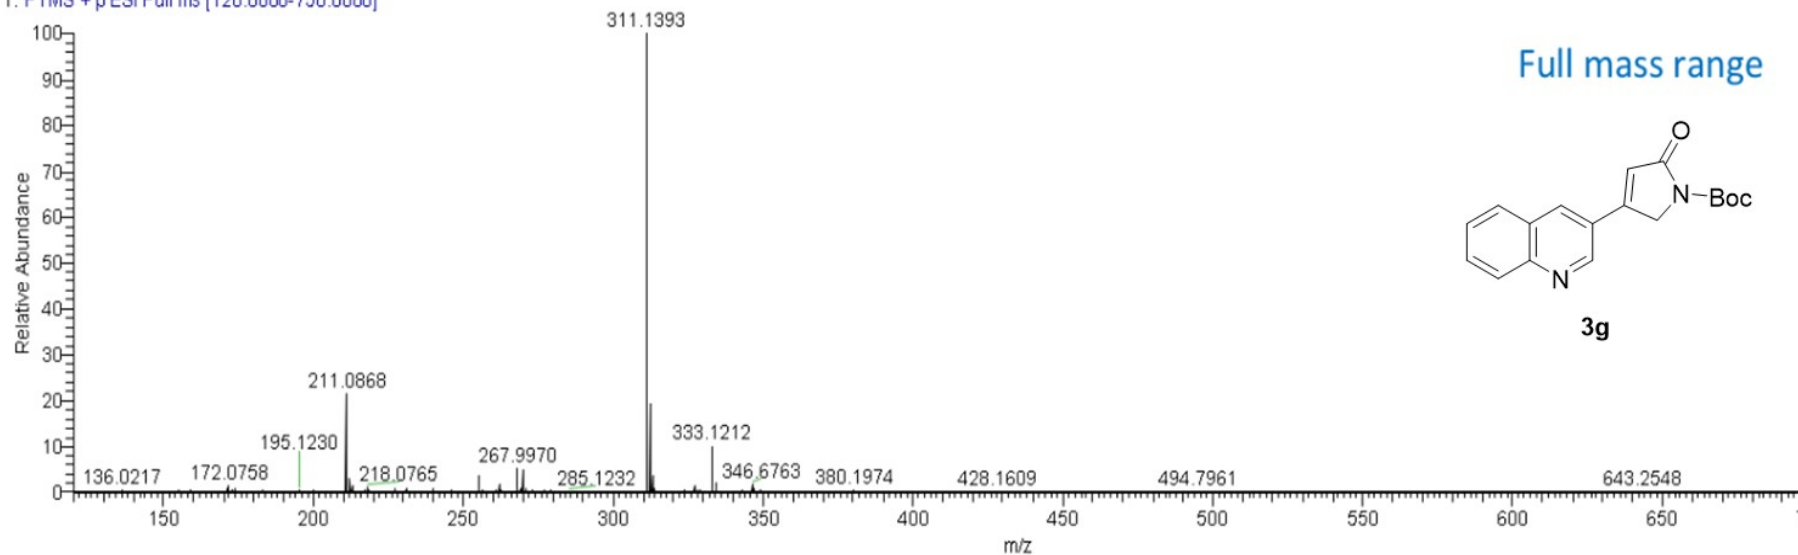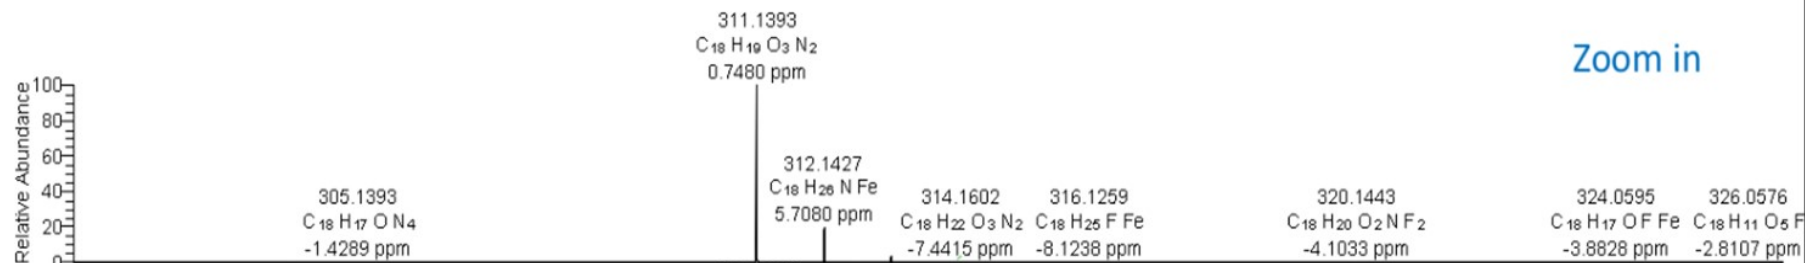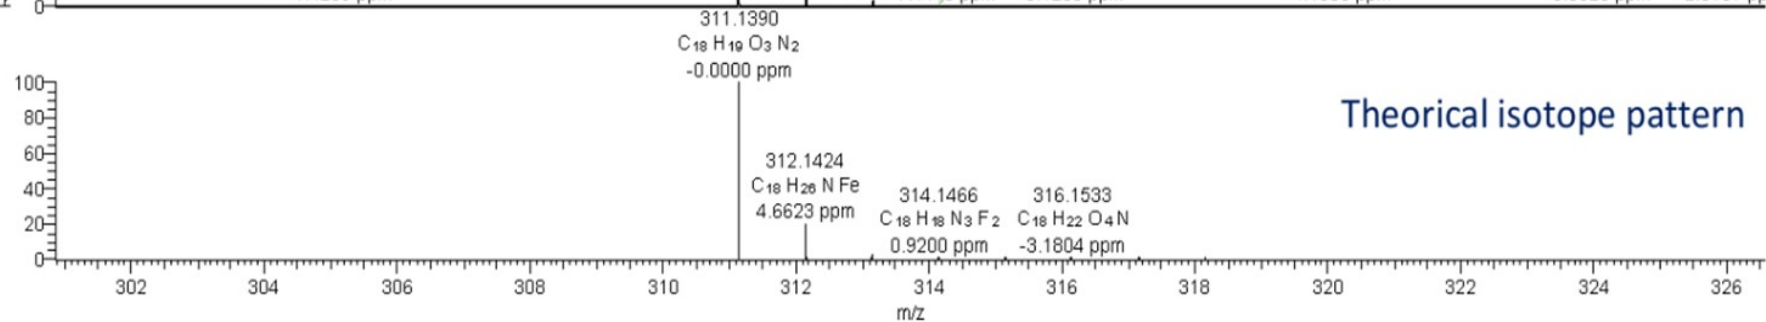HRMS (ESI<sup>+</sup>) of **3g**

YTH2191-B-20241025

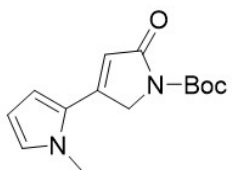

**3h**

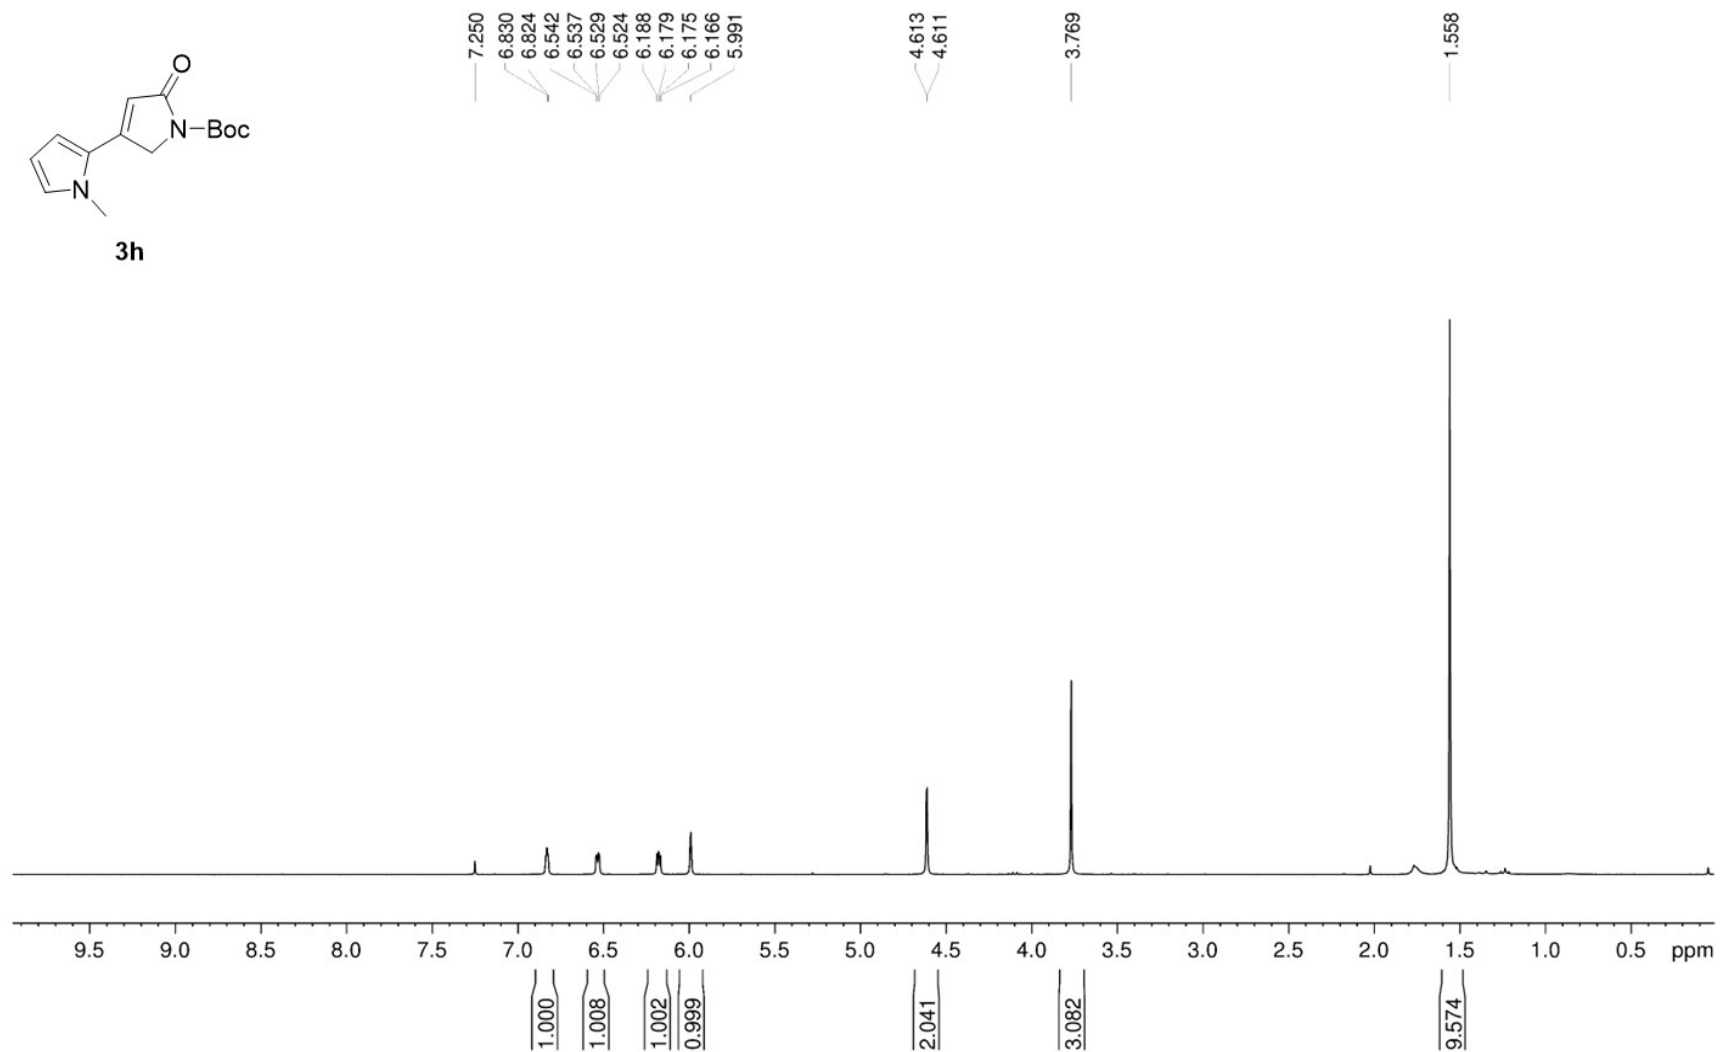

<sup>1</sup>H NMR (300 MHz, CDCl<sub>3</sub>) of **3h**

YTH2191-B-20241102

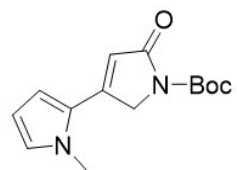

**3h**

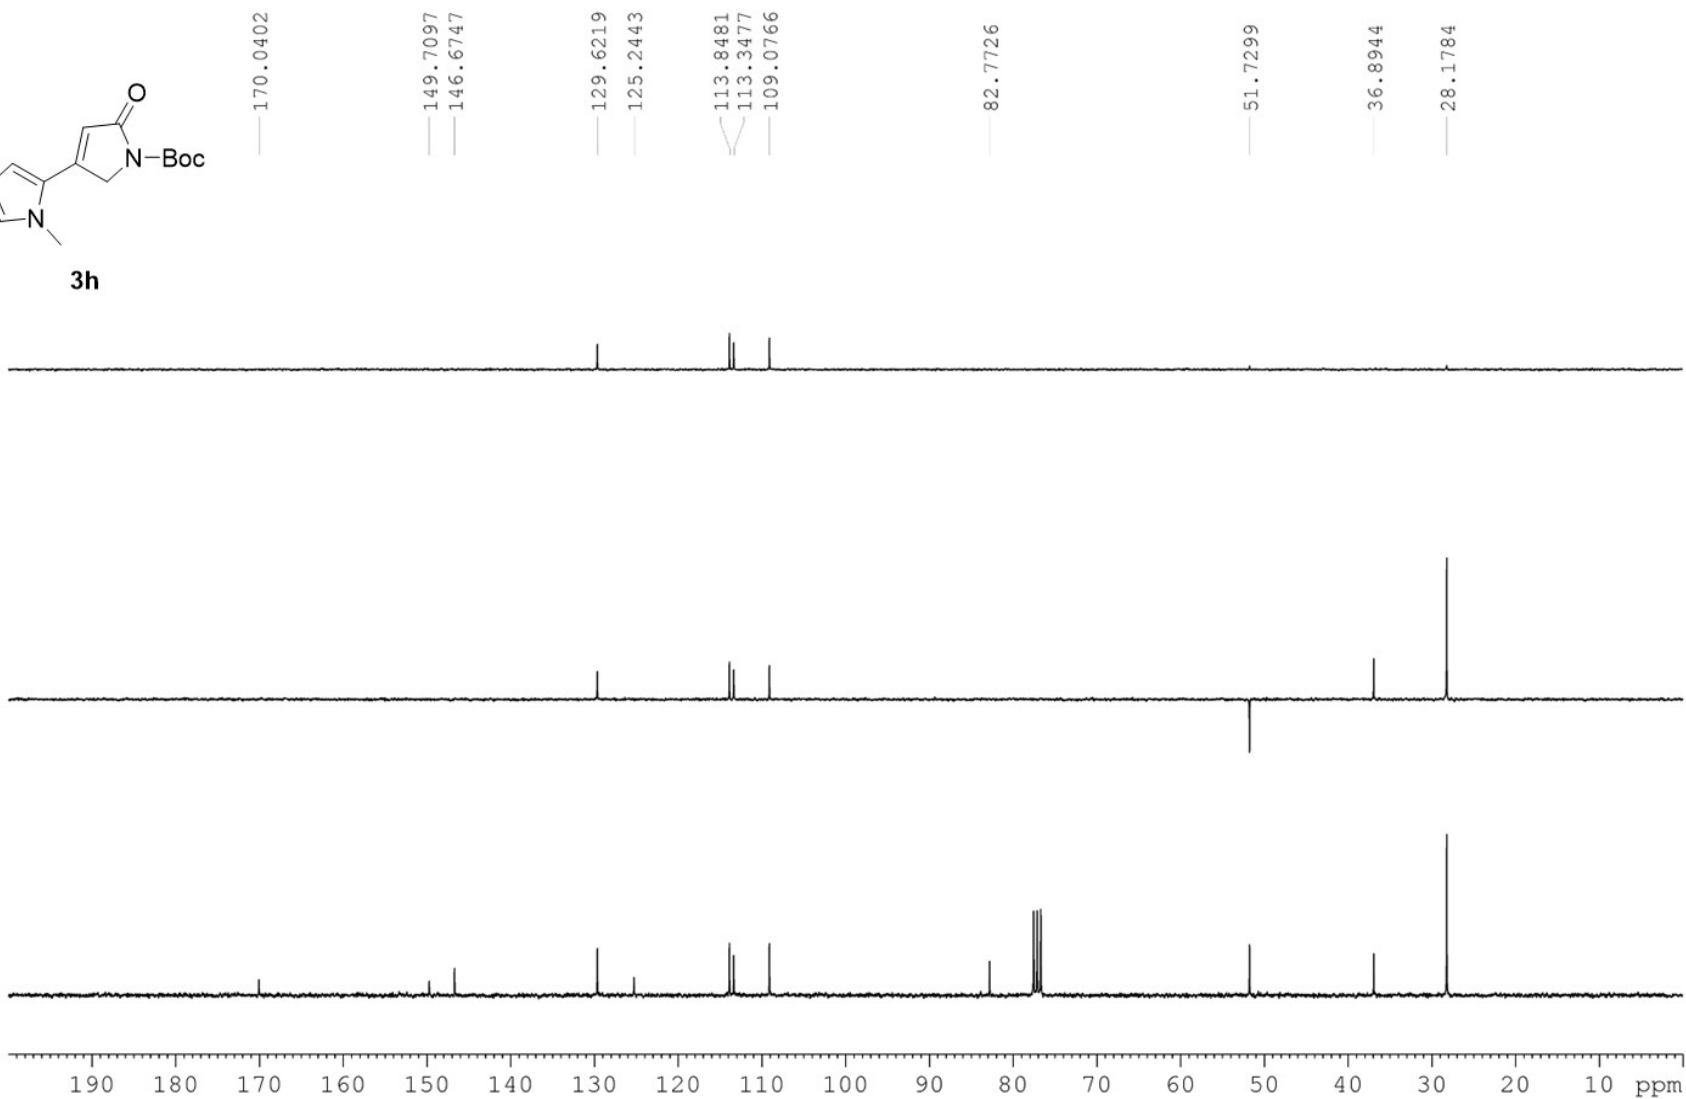

$^{13}\text{C}\{^1\text{H}\}$ -DEPT NMR (75 MHz,  $\text{CDCl}_3$ ) of **3h**

## Elemental Composition Report

### Single Mass Analysis

Tolerance = 500.0 PPM / DBE: min = -10.0, max = 100.0

Element prediction: Off

Number of isotope peaks used for i-FIT = 3

Monoisotopic Mass, Even Electron Ions

691 formula(e) evaluated with 248 results within limits (up to 25 closest results for each mass)

Elements Used:

C: 1-100 H: 1-100 N: 1-10 O: 1-10 Na: 0-1

YTH2203B

251112FJU10 252 (2.455) Cm (250:255-(235:242+277:284))

1: TOF MS ES+  
7.45e+003

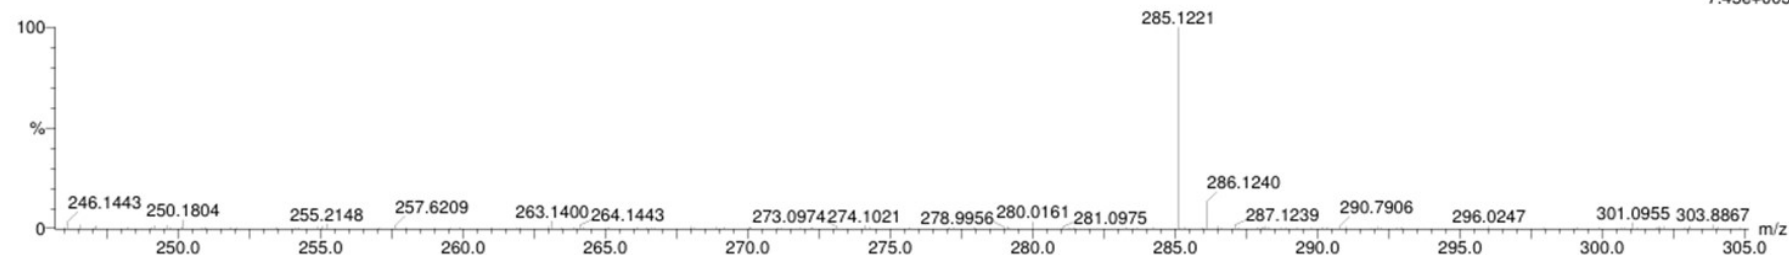

Minimum: 80.00  
Maximum: 100.00

| Mass     | RA     | Calc. Mass | mDa   | PPM   | DBE  | Formula          |
|----------|--------|------------|-------|-------|------|------------------|
| 285.1221 | 100.00 | 285.1215   | 0.6   | 2.1   | 6.5  | C14 H18 N2 O3 Na |
|          |        | 285.1212   | 0.9   | 3.2   | 10.5 | C12 H13 N8 O     |
|          |        | 285.1234   | -1.3  | -4.6  | -6.5 | C2 H22 N4 O10 Na |
|          |        | 285.1239   | -1.8  | -6.3  | 9.5  | C16 H17 N2 O3    |
|          |        | 285.1199   | 2.2   | 7.7   | 5.5  | C11 H17 N4 O5    |
|          |        | 285.1247   | -2.6  | -9.1  | -1.5 | C3 H18 N8 O6 Na  |
|          |        | 285.1188   | 3.3   | 11.6  | 7.5  | C10 H14 N8 O Na  |
|          |        | 285.1258   | -3.7  | -13.0 | -3.5 | C4 H21 N4 O10    |
|          |        | 285.1175   | 4.6   | 16.1  | 2.5  | C9 H18 N4 O5 Na  |
|          |        | 285.1172   | 4.9   | 17.2  | 6.5  | C7 H13 N10 O3    |
|          |        | 285.1271   | -5.0  | -17.5 | 1.5  | C5 H17 N8 O6     |
|          |        | 285.1274   | -5.3  | -18.6 | -2.5 | C7 H22 N2 O8 Na  |
|          |        | 285.1159   | 6.2   | 21.7  | 1.5  | C6 H17 N6 O7     |
|          |        | 285.1287   | -6.6  | -23.1 | 2.5  | C8 H18 N6 O4 Na  |
|          |        | 285.1148   | 7.3   | 25.6  | 3.5  | C5 H14 N10 O3 Na |
|          |        | 285.1298   | -7.7  | -27.0 | 0.5  | C9 H21 N2 O8     |
|          |        | 285.1135   | 8.6   | 30.2  | -1.5 | C4 H18 N6 O7 Na  |
|          |        | 285.1311   | -9.0  | -31.6 | 5.5  | C10 H17 N6 O4    |
|          |        | 285.1118   | 10.3  | 36.1  | -2.5 | C H17 N8 O9      |
|          |        | 285.1327   | -10.6 | -37.2 | 6.5  | C13 H18 N4 O2 Na |
|          |        | 285.1100   | 12.1  | 42.4  | 10.5 | C13 H13 N6 O2    |
|          |        | 285.1346   | -12.5 | -43.8 | -6.5 | C H22 N6 O9 Na   |
|          |        | 285.1352   | -13.1 | -45.9 | 9.5  | C15 H17 N4 O2    |
|          |        | 285.1087   | 13.4  | 47.0  | 5.5  | C12 H17 N2 O6    |
|          |        | 285.1359   | -13.8 | -48.4 | -1.5 | C2 H18 N10 O5 Na |

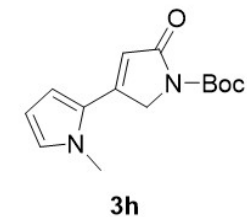

HRMS (ESI<sup>+</sup>) of 3h

YTH2192-B-20241114

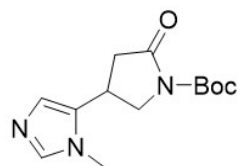

4

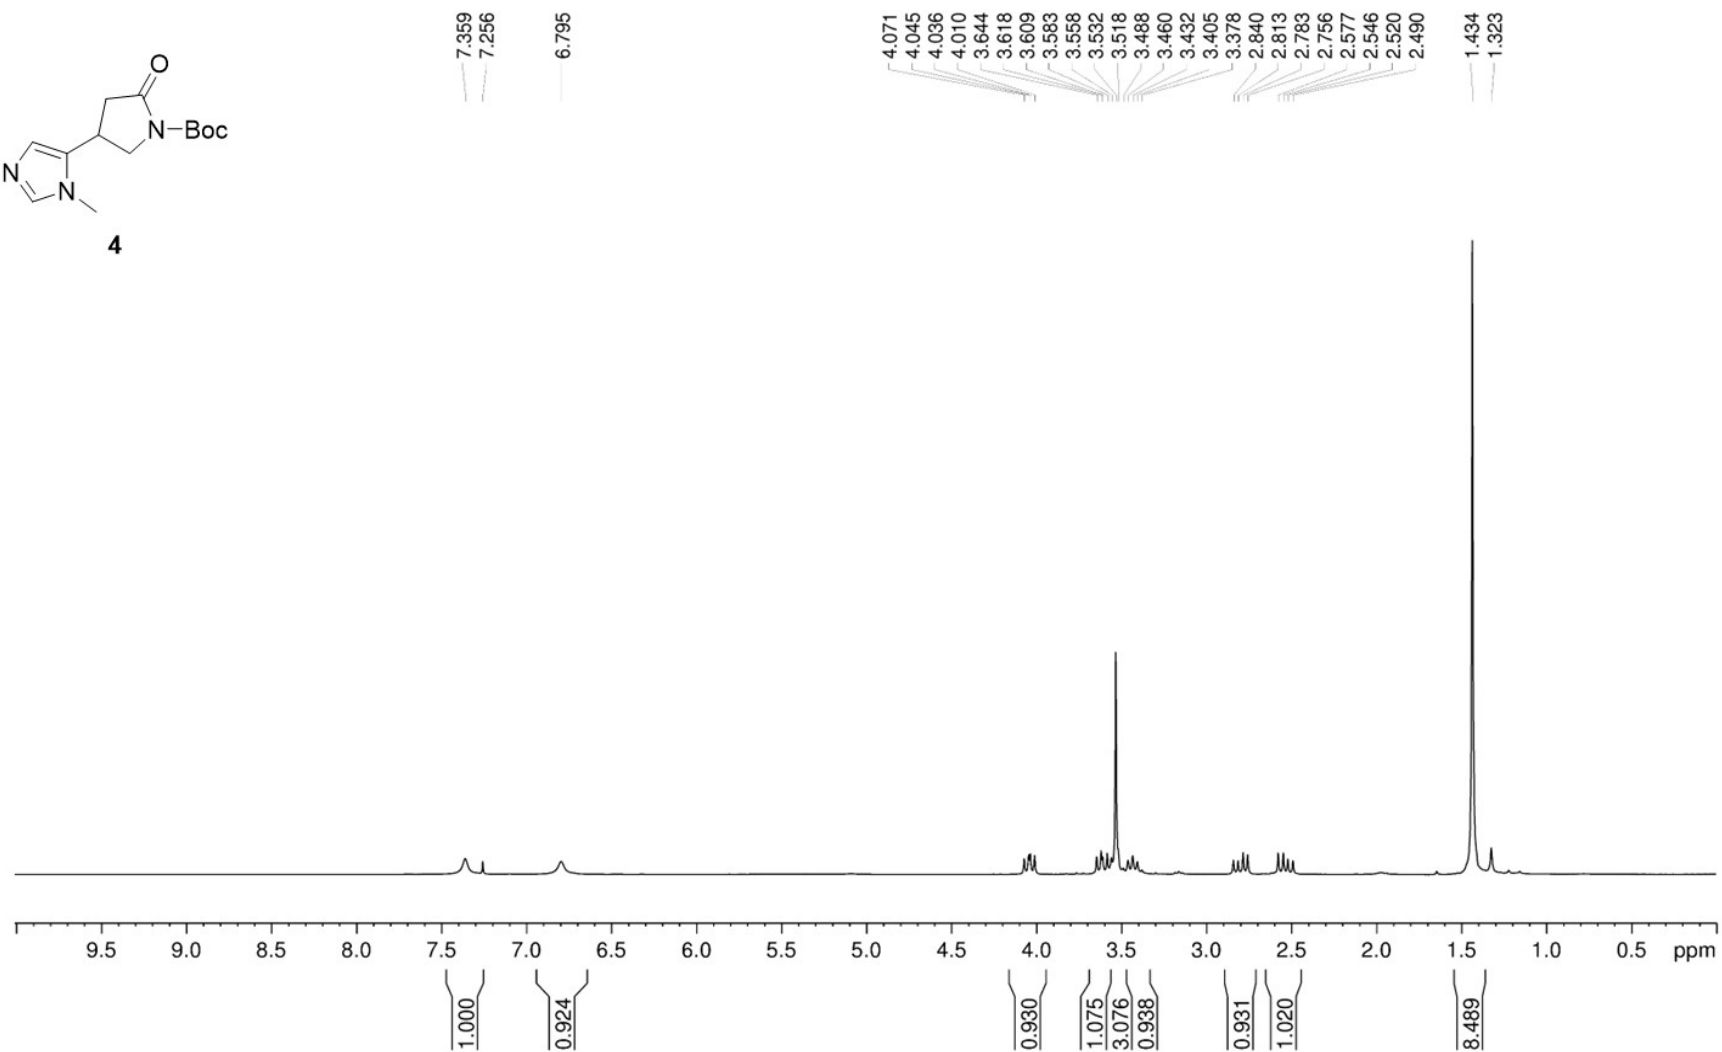

<sup>1</sup>H NMR (300 MHz, CDCl<sub>3</sub>) of 4 (trace of impurity)

YTH2192-B-20241114

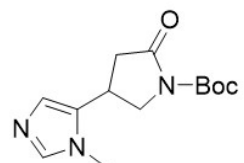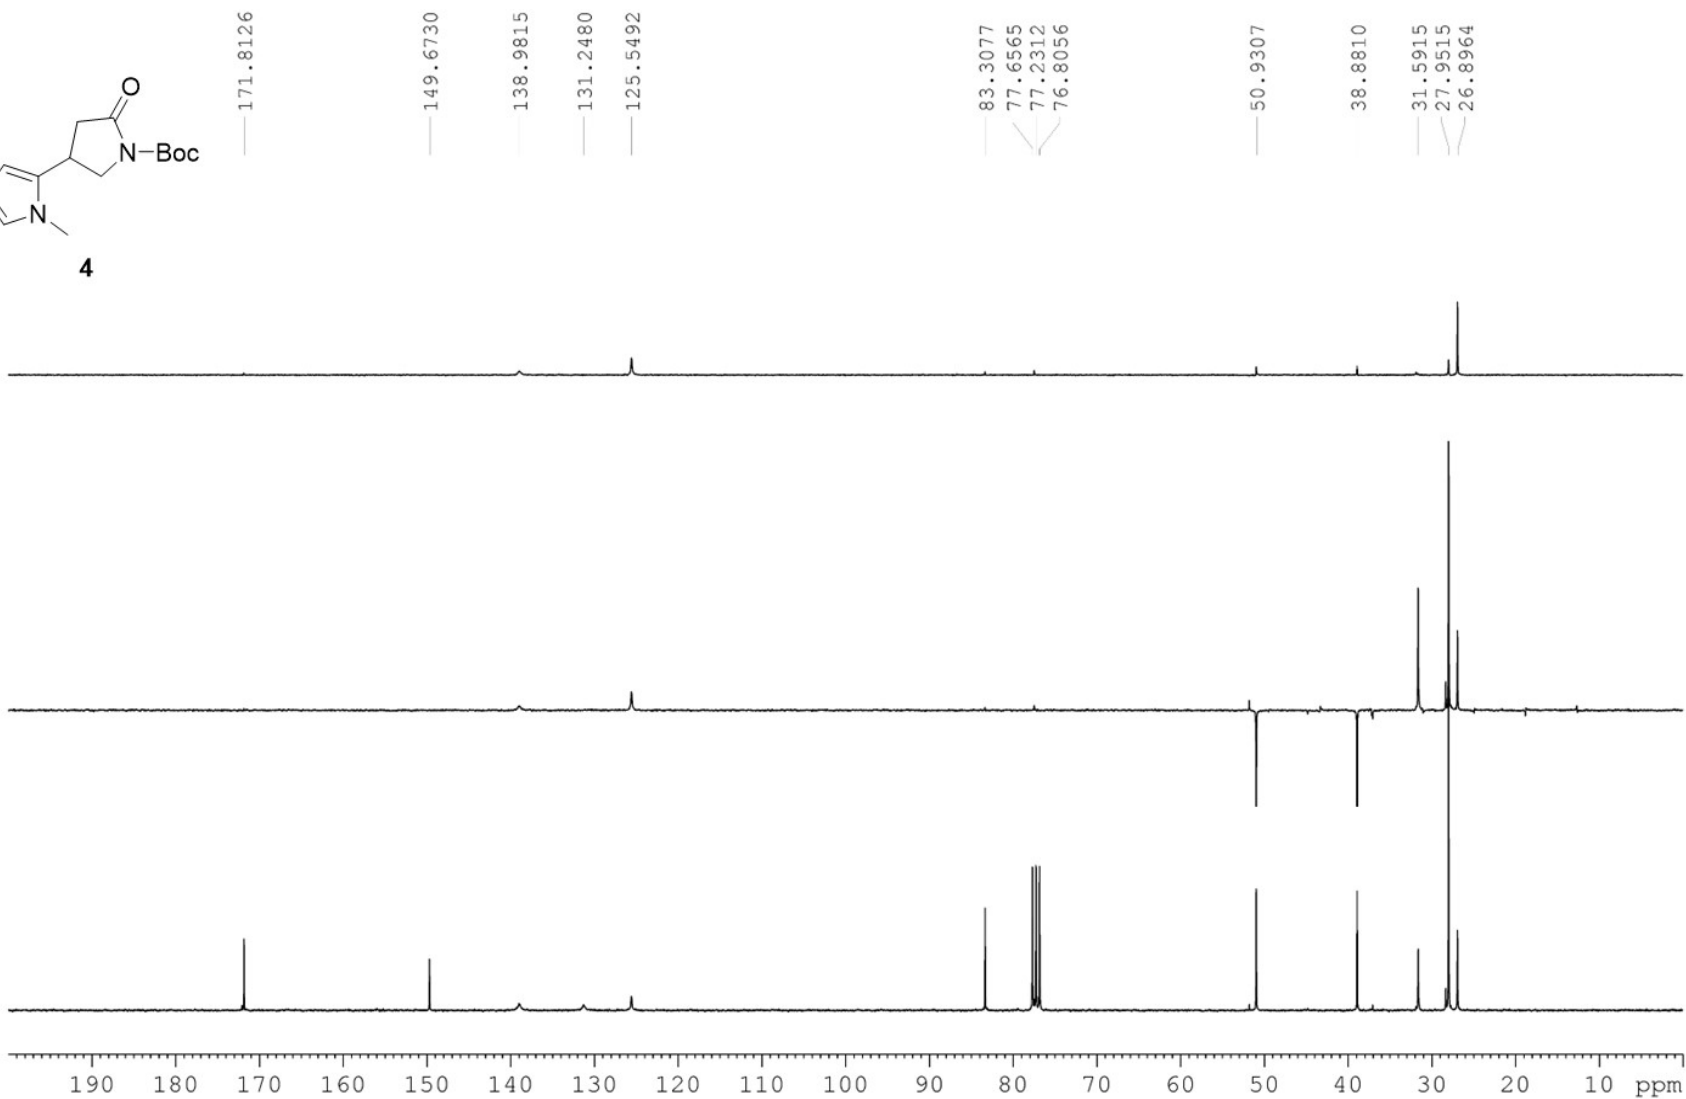

$^{13}\text{C}\{^1\text{H}\}$ -DEPT NMR (75 MHz,  $\text{CDCl}_3$ ) of 4

## Elemental Composition Report

### Single Mass Analysis

Tolerance = 500.0 PPM / DBE: min = -10.0, max = 100.0

Element prediction: Off

Number of isotope peaks used for i-FIT = 3

Monoisotopic Mass, Even Electron Ions

329 formula(e) evaluated with 118 results within limits (up to 25 closest results for each mass)

Elements Used:

C: 1-100 H: 1-100 N: 1-10 O: 1-10

YTH2149A2

250919FJU24 60 (0.611) Cm (58:62-(42:48+79:85))

1: TOF MS ES+  
1.22e+004

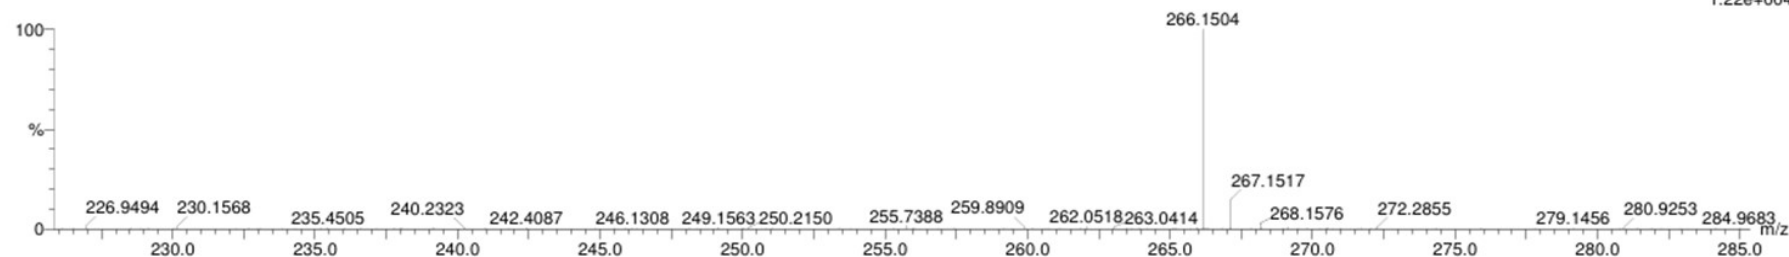

Minimum: 80.00  
Maximum: 100.00

| Mass     | RA     | Calc. Mass | mDa   | PPM   | DBE  | Formula       |
|----------|--------|------------|-------|-------|------|---------------|
| 266.1504 | 100.00 | 266.1505   | -0.1  | -0.4  | 5.5  | C13 H20 N3 O3 |
|          |        | 266.1523   | -1.9  | -7.1  | -7.5 | C H24 N5 O10  |
|          |        | 266.1478   | 2.6   | 9.8   | 6.5  | C9 H16 N9 O   |
|          |        | 266.1537   | -3.3  | -12.4 | -2.5 | C2 H20 N9 O6  |
|          |        | 266.1464   | 4.0   | 15.0  | 1.5  | C8 H20 N5 O5  |
|          |        | 266.1545   | -4.1  | -15.4 | 9.5  | C18 H20 N O   |
|          |        | 266.1451   | 5.3   | 19.9  | -3.5 | C7 H24 N O9   |
|          |        | 266.1563   | -5.9  | -22.2 | -3.5 | C6 H24 N3 O8  |
|          |        | 266.1577   | -7.3  | -27.4 | 1.5  | C7 H20 N7 O4  |
|          |        | 266.1424   | 8.0   | 30.1  | -2.5 | C3 H20 N7 O7  |
|          |        | 266.1604   | -10.0 | -37.6 | 0.5  | C11 H24 N O6  |
|          |        | 266.1392   | 11.2  | 42.1  | 5.5  | C14 H20 N O4  |
|          |        | 266.1617   | -11.3 | -42.5 | 5.5  | C12 H20 N5 O2 |
|          |        | 266.1365   | 13.9  | 52.2  | 6.5  | C10 H16 N7 O2 |
|          |        | 266.1352   | 15.2  | 57.1  | 1.5  | C9 H20 N3 O6  |
|          |        | 266.1676   | -17.2 | -64.6 | -3.5 | C5 H24 N5 O7  |
|          |        | 266.1325   | 17.9  | 67.3  | 2.5  | C5 H16 N9 O4  |
|          |        | 266.1689   | -18.5 | -69.5 | 1.5  | C6 H20 N9 O3  |
|          |        | 266.1312   | 19.2  | 72.1  | -2.5 | C4 H20 N5 O8  |
|          |        | 266.1293   | 21.1  | 79.3  | 10.5 | C16 H16 N3 O  |
|          |        | 266.1716   | -21.2 | -79.7 | 0.5  | C10 H24 N3 O5 |
|          |        | 266.1729   | -22.5 | -84.5 | 5.5  | C11 H20 N7 O  |
|          |        | 266.1253   | 25.1  | 94.3  | 6.5  | C11 H16 N5 O3 |
|          |        | 266.1756   | -25.2 | -94.7 | 4.5  | C15 H24 N O3  |
|          |        | 266.1240   | 26.4  | 99.2  | 1.5  | C10 H20 N O7  |

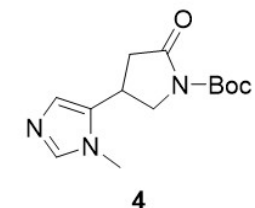

HRMS (ESI<sup>+</sup>) of 4

YTH3174-A-20251117

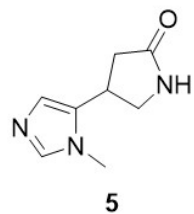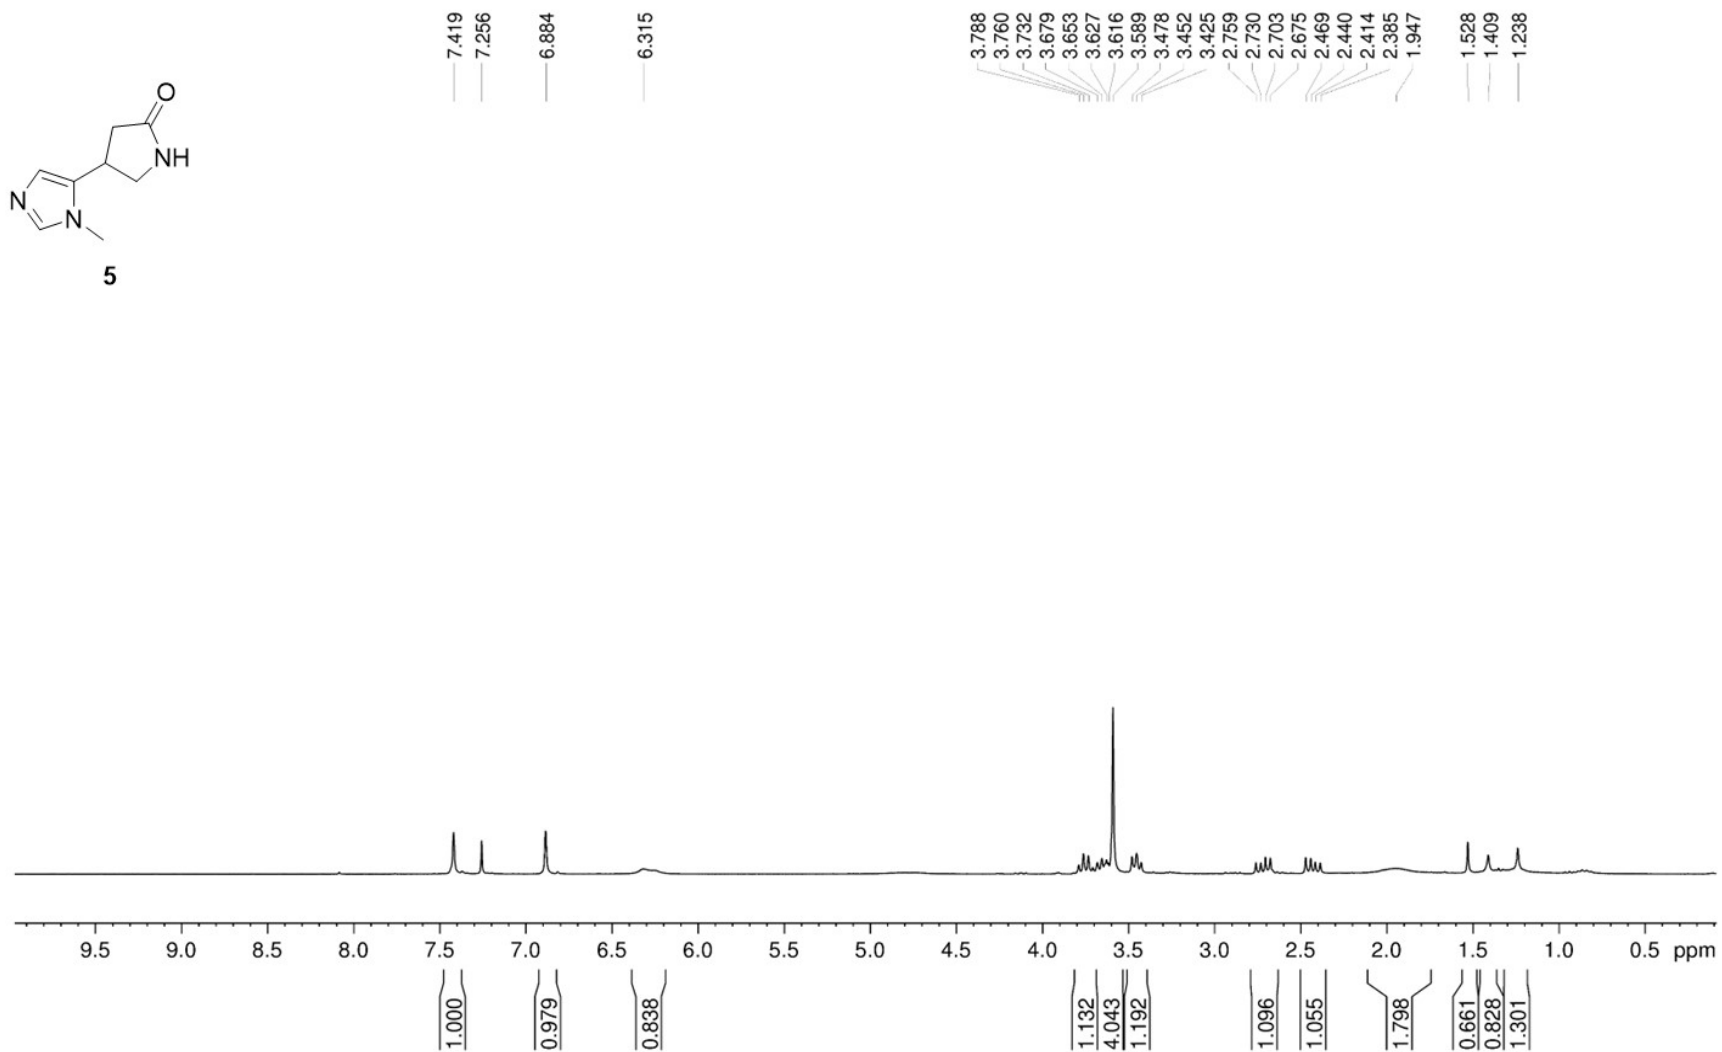

$^1\text{H}$  NMR (300 MHz,  $\text{CDCl}_3$ ) of **5** (trace of impurity)

YTH3174-A-20251118

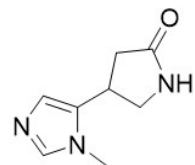

5

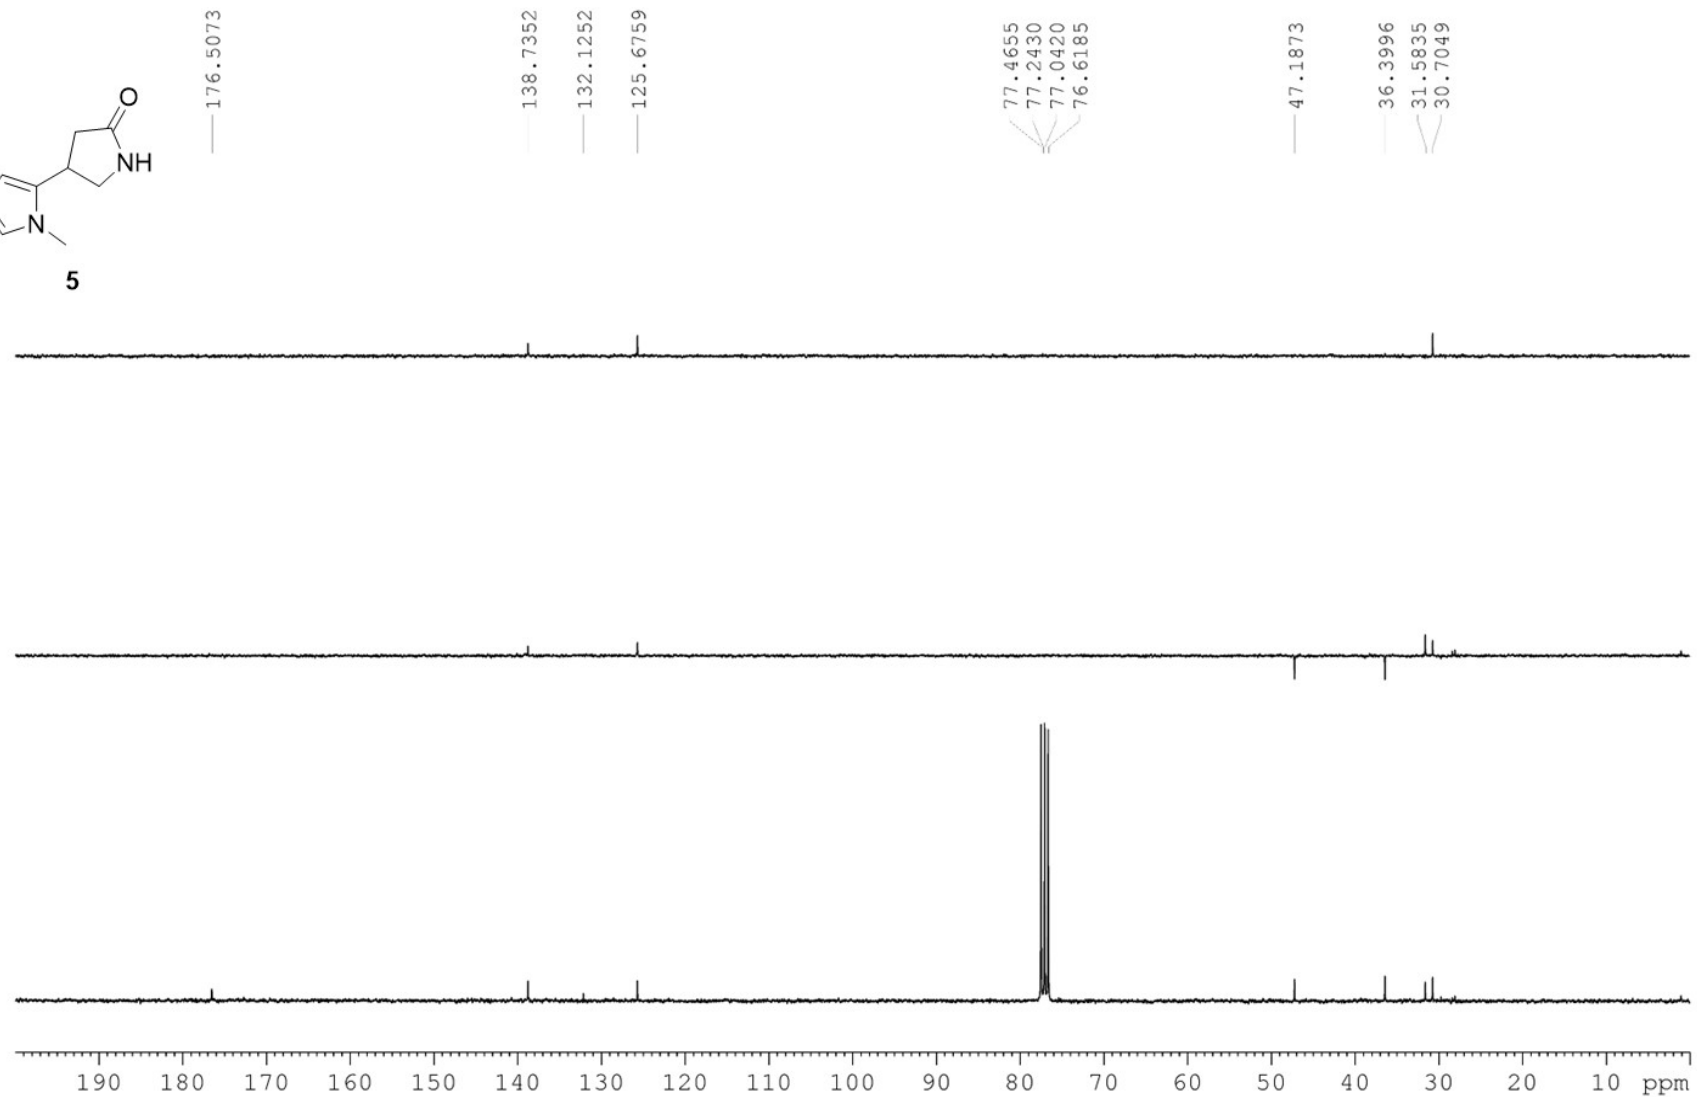

$^{13}\text{C}\{^1\text{H}\}$ -DEPT NMR (75 MHz,  $\text{CDCl}_3$ ) of **5**



## Elemental Composition Report

### Single Mass Analysis

Tolerance = 500.0 PPM / DBE: min = -10.0, max = 100.0

Element prediction: Off

Number of isotope peaks used for i-FIT = 3

Monoisotopic Mass, Even Electron Ions

111 formula(e) evaluated with 36 results within limits (up to 25 closest results for each mass)

Elements Used:

C: 1-100 H: 1-100 N: 1-10 O: 1-10

YTH3173B

251210FJU04 32 (0.331) Cm (29:34-(12:20+55:63))

1: TOF MS ES+  
5.83e+004

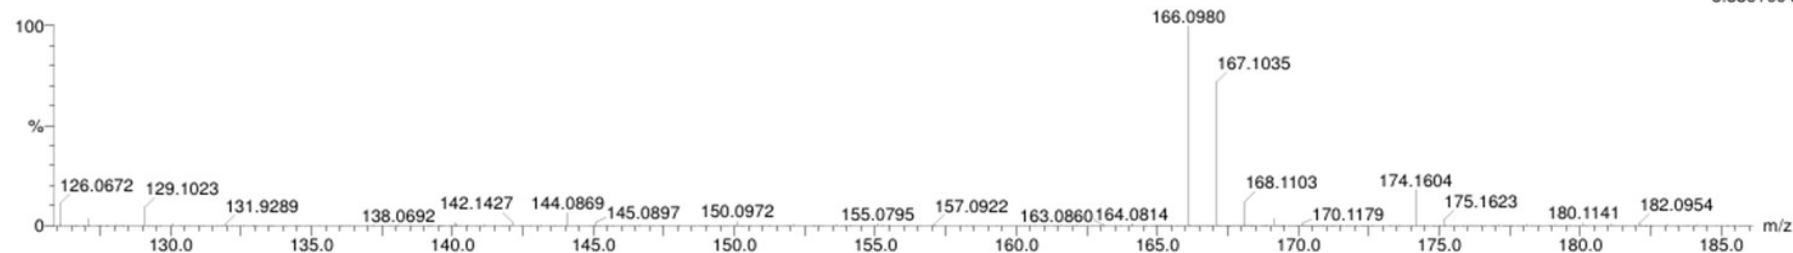

Minimum: 80.00  
Maximum: 100.00

| Mass     | RA     | Calc. Mass | mDa   | PPM    | DBE  | Formula      |
|----------|--------|------------|-------|--------|------|--------------|
| 166.0980 | 100.00 | 166.0980   | 0.0   | 0.0    | 4.5  | C8 H12 N3 O  |
| 166.0940 |        | 166.0940   | 4.0   | 24.1   | 0.5  | C3 H12 N5 O3 |
| 166.0927 |        | 166.0927   | 5.3   | 31.9   | -4.5 | C2 H16 N 07  |
| 166.1039 |        | 166.1039   | -5.9  | -35.5  | -4.5 | C H16 N3 O6  |
| 166.1052 |        | 166.1052   | -7.2  | -43.3  | 0.5  | C2 H12 N7 O2 |
| 166.1079 |        | 166.1079   | -9.9  | -59.6  | -0.5 | C6 H16 N 04  |
| 166.0868 |        | 166.0868   | 11.2  | 67.4   | 4.5  | C9 H12 N 02  |
| 166.0828 |        | 166.0828   | 15.2  | 91.5   | 0.5  | C4 H12 N3 O4 |
| 166.1165 |        | 166.1165   | -18.5 | -111.4 | 0.5  | C H12 N9 O   |
| 166.1192 |        | 166.1192   | -21.2 | -127.6 | -0.5 | C5 H16 N3 O3 |
| 166.0729 |        | 166.0729   | 25.1  | 151.1  | 5.5  | C6 H8 N5 O   |
| 166.1232 |        | 166.1232   | -25.2 | -151.7 | 3.5  | C10 H16 N 0  |
| 166.0715 |        | 166.0715   | 26.5  | 159.5  | 0.5  | C5 H12 N 05  |
| 166.0689 |        | 166.0689   | 29.1  | 175.2  | 1.5  | C H8 N7 O3   |
| 166.1291 |        | 166.1291   | -31.1 | -187.2 | -5.5 | C3 H20 N 06  |
| 166.1304 |        | 166.1304   | -32.4 | -195.1 | -0.5 | C4 H16 N5 O2 |
| 166.0617 |        | 166.0617   | 36.3  | 218.5  | 5.5  | C7 H8 N3 O2  |
| 166.0576 |        | 166.0576   | 40.4  | 243.2  | 1.5  | C2 H8 N5 O4  |
| 166.0563 |        | 166.0563   | 41.7  | 251.1  | -3.5 | C H12 N 08   |
| 166.1403 |        | 166.1403   | -42.3 | -254.7 | -5.5 | C2 H20 N3 O5 |
| 166.1416 |        | 166.1416   | -43.6 | -262.5 | -0.5 | C3 H16 N7 O  |
| 166.1443 |        | 166.1443   | -46.3 | -278.8 | -1.5 | C7 H20 N 03  |
| 166.0504 |        | 166.0504   | 47.6  | 286.6  | 5.5  | C8 H8 N 03   |
| 166.0477 |        | 166.0477   | 50.3  | 302.8  | 6.5  | C4 H4 N7 O   |
| 166.0464 |        | 166.0464   | 51.6  | 310.7  | 1.5  | C3 H8 N3 O5  |

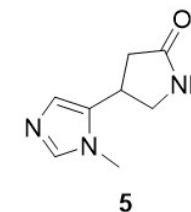

HRMS (ESI<sup>+</sup>) of **5**

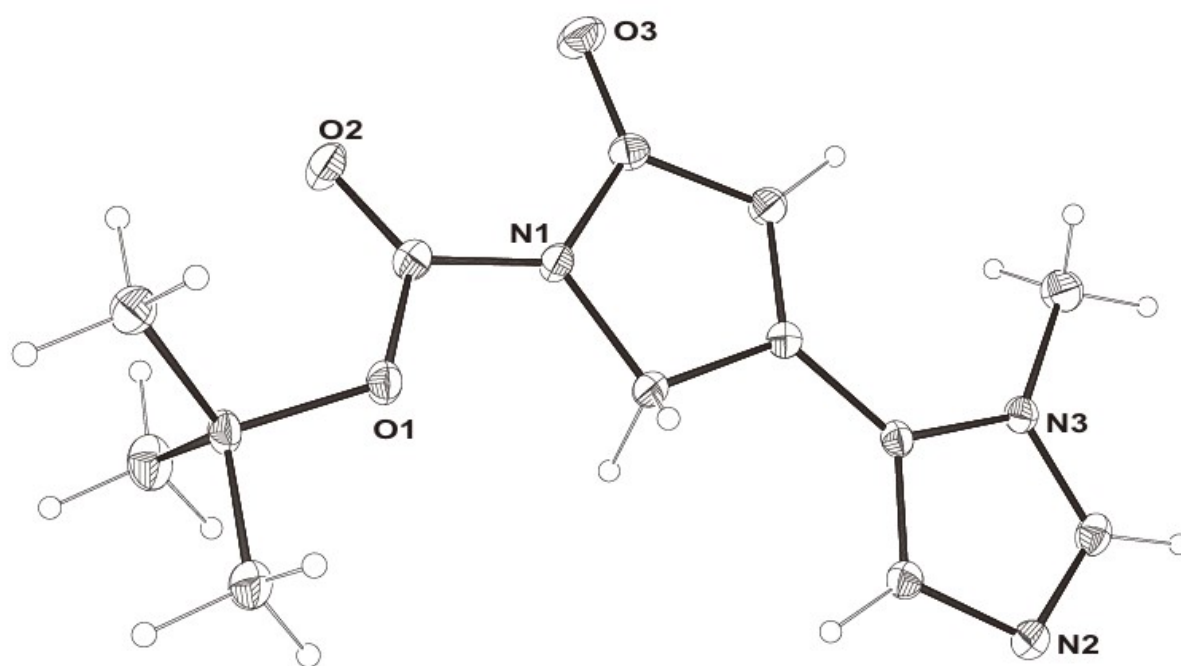

Figure 1. X-ray crystal structure of compound **3a**

## Deposition Number 2501597

Crystallographic data were obtained from Dual X-ray Single Crystal Diffractometer, and the ellipsoid contour probability is 30%.

## checkCIF/PLATON report

Structure factors have been supplied for datablock(s) shelx

THIS REPORT IS FOR GUIDANCE ONLY. IF USED AS PART OF A REVIEW PROCEDURE FOR PUBLICATION, IT SHOULD NOT REPLACE THE EXPERTISE OF AN EXPERIENCED CRYSTALLOGRAPHIC REFEREE.

No syntax errors found.      CIF dictionary      Interpreting this report

### Datablock: shelx

---

|                        |                          |                           |                            |
|------------------------|--------------------------|---------------------------|----------------------------|
| Bond precision:        | C-C = 0.0044 A           | Wavelength=0.71073        |                            |
| Cell:                  | a=5.8928 (6)<br>alpha=90 | b=13.3792 (15)<br>beta=90 | c=16.7377 (18)<br>gamma=90 |
| Temperature:           | 200 K                    |                           |                            |
|                        | Calculated               | Reported                  |                            |
| Volume                 | 1319.6 (2)               | 1319.6 (2)                |                            |
| Space group            | P 21 21 21               | P 21 21 21                |                            |
| Hall group             | P 2ac 2ab                | P 2ac 2ab                 |                            |
| Moiety formula         | C13 H17 N3 O3            | C13 H17 N3 O3             |                            |
| Sum formula            | C13 H17 N3 O3            | C13 H17 N3 O3             |                            |
| Mr                     | 263.30                   | 263.29                    |                            |
| Dx, g cm <sup>-3</sup> | 1.325                    | 1.325                     |                            |
| Z                      | 4                        | 4                         |                            |
| Mu (mm <sup>-1</sup> ) | 0.096                    | 0.096                     |                            |
| F000                   | 560.0                    | 560.0                     |                            |
| F000'                  | 560.26                   |                           |                            |
| h, k, lmax             | 7, 15, 19                | 7, 15, 19                 |                            |
| Nref                   | 2322 [ 1372]             | 2319                      |                            |
| Tmin, Tmax             | 0.991, 0.998             | 0.928, 0.998              |                            |
| Tmin'                  | 0.927                    |                           |                            |

Correction method= # Reported T Limits: Tmin=0.928 Tmax=0.998

AbsCorr = MULTI-SCAN

Data completeness= 1.69/1.00

Theta(max)= 25.034

R(reflections)= 0.0414( 1948)

wR2(reflections)=

0.1066( 2319)

S = 1.015

Npar= 176

The following ALERTS were generated. Each ALERT has the format **test-name\_ALERT\_alert-type\_alert-level**. Click on the hyperlinks for more details of the test.

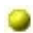

**Alert level C**

ABSTY02\_ALERT\_1\_C An `_exptl_absorpt_correction_type` has been given without a literature citation. This should be contained in the `_exptl_absorpt_process_details` field.

Absorption correction given as multi-scan STRVA01\_ALERT\_4\_C

Flack test results are ambiguous.

From the CIF: `_refine_ls_abs_structure_Flack` 0.500

From the CIF: `_refine_ls_abs_structure_Flack_su` 1.000 PLAT340\_ALERT\_3\_C Low

Bond Precision on C-C Bonds ..... 0.00438 Ang.

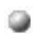

**Alert level G**

|                                                                                 |              |
|---------------------------------------------------------------------------------|--------------|
| PLAT032_ALERT_4_G Std. Uncertainty on Flack Parameter Value High .              | 1.000 Report |
| PLAT063_ALERT_4_G Crystal Size Possibly too Large for Beam Size ..              | 0.79 mm      |
| PLAT066_ALERT_1_G Predicted and Reported Tmin&Tmax Range Identical              | ? Check      |
| PLAT883_ALERT_1_G Absent Datum for <code>_atom_sites_solution_primary</code> .. | Please Do !  |
| PLAT909_ALERT_3_G Percentage of I>2sig(I) Data at Theta(Max) Still              | 56% Note     |
| PLAT910_ALERT_3_G Missing FCF Reflection(s) Below Theta(Min) [Deg]=             | 2.43 Note    |
| 0 1 1,                                                                          |              |
| PLAT916_ALERT_2_G Hooft y and Flack x Parameter Values Differ by .              | 1.00 Check   |
| PLAT933_ALERT_2_G Number of HKL-OMIT Records in Embedded .res File              | 1 Note       |
| 0 1 1,                                                                          |              |
| PLAT965_ALERT_2_G The SHELXL WEIGHT Optimisation has not Converged              | Please Check |
| PLAT969_ALERT_5_G The 'Henn et al.' R-Factor-gap value .....                    | 2.060 Note   |
| Predicted wR2: Based on SigI**2 5.18 or SHELX Weight 10.51                      |              |
| PLAT978_ALERT_2_G Number C-C Bonds with Positive Residual Density.              | 0 Info       |

0 **ALERT level A** = Most likely a serious problem - resolve or explain

0 **ALERT level B** = A potentially serious problem, consider carefully

3 **ALERT level C** = Check. Ensure it is not caused by an omission or oversight

11 **ALERT level G** = General information/check it is not something unexpected

3 ALERT type 1 CIF construction/syntax error, inconsistent or missing data

4 ALERT type 2 Indicator that the structure model may be wrong or deficient

3 ALERT type 3 Indicator that the structure quality may be low 3

ALERT type 4 Improvement, methodology, query or suggestion

1 ALERT type 5 Informative message, check

---

It is advisable to attempt to resolve as many as possible of the alerts in all categories. Often the minor alerts point to easily fixed oversights, errors and omissions in your CIF or refinement strategy, so attention to these fine details can be worthwhile. It is up to the individual to critically assess their own results and, if necessary, seek expert advice.

---

**PLATON version of 26/09/2025; check.def file version of 20/09/2025**

---

**du**

## **plicate check**

**No duplication found**

---

Datablock shelx - ellipsoid plot

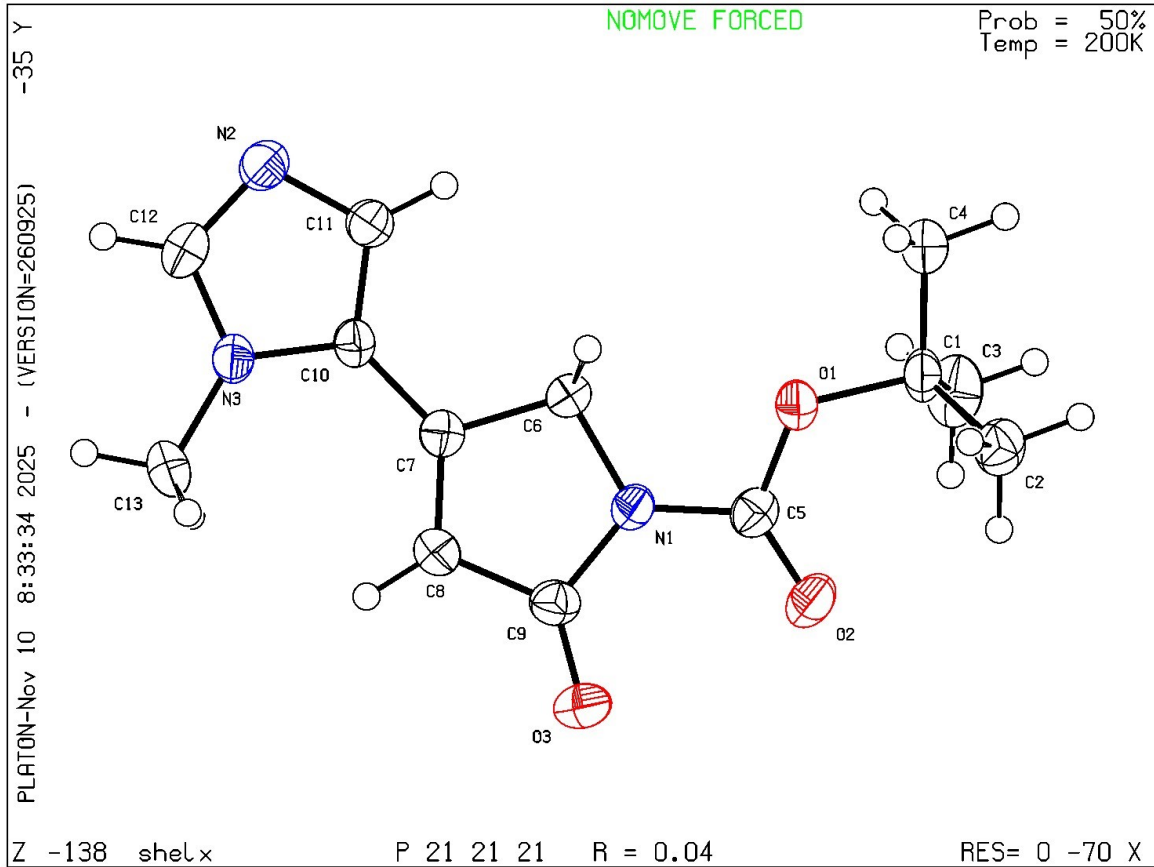

Table 1. Crystal data and structure refinement for d25314.

|                                   |                                                               |          |
|-----------------------------------|---------------------------------------------------------------|----------|
| Identification code               | shelx                                                         |          |
| Empirical formula                 | C <sub>13</sub> H <sub>17</sub> N <sub>3</sub> O <sub>3</sub> |          |
| Formula weight                    | 263.29                                                        |          |
| Temperature                       | 200(2) K                                                      |          |
| Wavelength                        | 0.71073 Å                                                     |          |
| Crystal system                    | Orthorhombic                                                  |          |
| Space group                       | P 21 21 21                                                    |          |
| Unit cell dimensions              | a = 5.8928(6) Å                                               | α = 90°. |
|                                   | b = 13.3792(15) Å                                             | β = 90°. |
|                                   | c = 16.7377(18) Å                                             | γ = 90°. |
| Volume                            | 1319.6(2) Å <sup>3</sup>                                      |          |
| Z                                 | 4                                                             |          |
| Density (calculated)              | 1.325 Mg/m <sup>3</sup>                                       |          |
| Absorption coefficient            | 0.096 mm <sup>-1</sup>                                        |          |
| F(000)                            | 560                                                           |          |
| Crystal size                      | 0.790 x 0.080 x 0.020 mm <sup>3</sup>                         |          |
| Theta range for data collection   | 2.434 to 25.034°.                                             |          |
| Index ranges                      | -5 ≤ h ≤ 7, -15 ≤ k ≤ 13, -19 ≤ l ≤ 18                        |          |
| Reflections collected             | 8375                                                          |          |
| Independent reflections           | 2319 [R(int) = 0.0530]                                        |          |
| Completeness to theta = 25.034°   | 99.9 %                                                        |          |
| Refinement method                 | Full-matrix least-squares on F <sup>2</sup>                   |          |
| Data / restraints / parameters    | 2319 / 0 / 176                                                |          |
| Goodness-of-fit on F <sup>2</sup> | 1.015                                                         |          |
| Final R indices [I > 2σ(I)]       | R1 = 0.0414, wR2 = 0.0951                                     |          |
| R indices (all data)              | R1 = 0.0549, wR2 = 0.1066                                     |          |
| Absolute structure parameter      | 0.5(10)                                                       |          |
| Extinction coefficient            | n/a                                                           |          |
| Largest diff. peak and hole       | 0.137 and -0.172 e.Å <sup>-3</sup>                            |          |

Table 2. Atomic coordinates ( $\times 10^4$ ) and equivalent isotropic displacement parameters ( $\text{\AA}^2 \times 10^3$ ) for d25314.  $U(\text{eq})$  is defined as one third of the trace of the orthogonalized  $U^{ij}$  tensor.

|       | x        | y       | z       | $U(\text{eq})$ |
|-------|----------|---------|---------|----------------|
| C(1)  | -1136(5) | 4472(2) | 5106(2) | 32(1)          |
| C(2)  | -3697(5) | 4526(3) | 5105(2) | 40(1)          |
| C(3)  | -263(7)  | 3444(3) | 4880(2) | 50(1)          |
| C(4)  | -185(6)  | 4808(3) | 5905(2) | 46(1)          |
| C(5)  | -562(5)  | 5221(2) | 3771(2) | 31(1)          |
| C(6)  | 2854(5)  | 6327(2) | 3822(2) | 30(1)          |
| C(7)  | 3945(5)  | 6969(2) | 3191(2) | 28(1)          |
| C(8)  | 2723(6)  | 6904(3) | 2511(2) | 35(1)          |
| C(9)  | 798(5)   | 6229(2) | 2612(2) | 32(1)          |
| C(10) | 5944(5)  | 7515(2) | 3412(2) | 28(1)          |
| C(11) | 7056(5)  | 7525(2) | 4134(2) | 32(1)          |
| C(12) | 8935(5)  | 8492(2) | 3377(2) | 35(1)          |
| C(13) | 6786(7)  | 8401(3) | 2094(2) | 49(1)          |
| N(1)  | 927(4)   | 5878(2) | 3402(2) | 29(1)          |
| N(2)  | 8926(4)  | 8135(2) | 4112(2) | 35(1)          |
| N(3)  | 7198(4)  | 8153(2) | 2928(2) | 30(1)          |
| O(1)  | -122(4)  | 5213(2) | 4550(1) | 35(1)          |
| O(2)  | -1973(4) | 4730(2) | 3428(1) | 44(1)          |
| O(3)  | -643(4)  | 6001(2) | 2125(1) | 49(1)          |

Table 3. Bond lengths [ $\text{\AA}$ ] and angles [ $^\circ$ ] for d25314.

---

|              |          |
|--------------|----------|
| C(1)-O(1)    | 1.484(4) |
| C(1)-C(2)    | 1.511(4) |
| C(1)-C(4)    | 1.517(4) |
| C(1)-C(3)    | 1.517(5) |
| C(2)-H(2A)   | 0.9800   |
| C(2)-H(2B)   | 0.9800   |
| C(2)-H(2C)   | 0.9800   |
| C(3)-H(3A)   | 0.9800   |
| C(3)-H(3B)   | 0.9800   |
| C(3)-H(3C)   | 0.9800   |
| C(4)-H(4A)   | 0.9800   |
| C(4)-H(4B)   | 0.9800   |
| C(4)-H(4C)   | 0.9800   |
| C(5)-O(2)    | 1.205(4) |
| C(5)-O(1)    | 1.330(4) |
| C(5)-N(1)    | 1.387(4) |
| C(6)-N(1)    | 1.464(4) |
| C(6)-C(7)    | 1.505(4) |
| C(6)-H(6A)   | 0.9900   |
| C(6)-H(6B)   | 0.9900   |
| C(7)-C(8)    | 1.349(4) |
| C(7)-C(10)   | 1.434(4) |
| C(8)-C(9)    | 1.460(5) |
| C(8)-H(8)    | 0.9500   |
| C(9)-O(3)    | 1.216(4) |
| C(9)-N(1)    | 1.405(4) |
| C(10)-C(11)  | 1.374(4) |
| C(10)-N(3)   | 1.390(4) |
| C(11)-N(2)   | 1.372(4) |
| C(11)-H(11)  | 0.9500   |
| C(12)-N(2)   | 1.320(4) |
| C(12)-N(3)   | 1.348(4) |
| C(12)-H(12)  | 0.9500   |
| C(13)-N(3)   | 1.455(4) |
| C(13)-H(13A) | 0.9800   |
| C(13)-H(13B) | 0.9800   |
| C(13)-H(13C) | 0.9800   |

|                  |          |
|------------------|----------|
| O(1)-C(1)-C(2)   | 111.7(3) |
| O(1)-C(1)-C(4)   | 101.9(2) |
| C(2)-C(1)-C(4)   | 110.9(3) |
| O(1)-C(1)-C(3)   | 108.2(3) |
| C(2)-C(1)-C(3)   | 112.4(3) |
| C(4)-C(1)-C(3)   | 111.3(3) |
| C(1)-C(2)-H(2A)  | 109.5    |
| C(1)-C(2)-H(2B)  | 109.5    |
| H(2A)-C(2)-H(2B) | 109.5    |
| C(1)-C(2)-H(2C)  | 109.5    |
| H(2A)-C(2)-H(2C) | 109.5    |
| H(2B)-C(2)-H(2C) | 109.5    |
| C(1)-C(3)-H(3A)  | 109.5    |
| C(1)-C(3)-H(3B)  | 109.5    |
| H(3A)-C(3)-H(3B) | 109.5    |
| C(1)-C(3)-H(3C)  | 109.5    |
| H(3A)-C(3)-H(3C) | 109.5    |
| H(3B)-C(3)-H(3C) | 109.5    |
| C(1)-C(4)-H(4A)  | 109.5    |
| C(1)-C(4)-H(4B)  | 109.5    |
| H(4A)-C(4)-H(4B) | 109.5    |
| C(1)-C(4)-H(4C)  | 109.5    |
| H(4A)-C(4)-H(4C) | 109.5    |
| H(4B)-C(4)-H(4C) | 109.5    |
| O(2)-C(5)-O(1)   | 126.7(3) |
| O(2)-C(5)-N(1)   | 124.7(3) |
| O(1)-C(5)-N(1)   | 108.5(3) |
| N(1)-C(6)-C(7)   | 103.2(2) |
| N(1)-C(6)-H(6A)  | 111.1    |
| C(7)-C(6)-H(6A)  | 111.1    |
| N(1)-C(6)-H(6B)  | 111.1    |
| C(7)-C(6)-H(6B)  | 111.1    |
| H(6A)-C(6)-H(6B) | 109.1    |
| C(8)-C(7)-C(10)  | 133.6(3) |
| C(8)-C(7)-C(6)   | 109.1(3) |
| C(10)-C(7)-C(6)  | 117.4(3) |
| C(7)-C(8)-C(9)   | 110.9(3) |
| C(7)-C(8)-H(8)   | 124.5    |
| C(9)-C(8)-H(8)   | 124.5    |
| O(3)-C(9)-N(1)   | 125.8(3) |

|                     |          |
|---------------------|----------|
| O(3)-C(9)-C(8)      | 128.3(3) |
| N(1)-C(9)-C(8)      | 105.9(3) |
| C(11)-C(10)-N(3)    | 104.6(3) |
| C(11)-C(10)-C(7)    | 128.6(3) |
| N(3)-C(10)-C(7)     | 126.8(3) |
| N(2)-C(11)-C(10)    | 111.4(3) |
| N(2)-C(11)-H(11)    | 124.3    |
| C(10)-C(11)-H(11)   | 124.3    |
| N(2)-C(12)-N(3)     | 113.2(3) |
| N(2)-C(12)-H(12)    | 123.4    |
| N(3)-C(12)-H(12)    | 123.4    |
| N(3)-C(13)-H(13A)   | 109.5    |
| N(3)-C(13)-H(13B)   | 109.5    |
| H(13A)-C(13)-H(13B) | 109.5    |
| N(3)-C(13)-H(13C)   | 109.5    |
| H(13A)-C(13)-H(13C) | 109.5    |
| H(13B)-C(13)-H(13C) | 109.5    |
| C(5)-N(1)-C(9)      | 126.6(3) |
| C(5)-N(1)-C(6)      | 122.5(2) |
| C(9)-N(1)-C(6)      | 110.9(2) |
| C(12)-N(2)-C(11)    | 104.1(3) |
| C(12)-N(3)-C(10)    | 106.6(3) |
| C(12)-N(3)-C(13)    | 125.8(3) |
| C(10)-N(3)-C(13)    | 127.6(3) |
| C(5)-O(1)-C(1)      | 122.8(2) |

---

Symmetry transformations used to generate equivalent atoms:

Table 4. Anisotropic displacement parameters ( $\text{\AA}^2 \times 10^3$ ) for d25314. The anisotropic displacement factor exponent takes the form:  $-2\pi^2 [ h^2 a^{*2} U^{11} + \dots + 2 h k a^* b^* U^{12} ]$

|       | $U^{11}$ | $U^{22}$ | $U^{33}$ | $U^{23}$ | $U^{13}$ | $U^{12}$ |
|-------|----------|----------|----------|----------|----------|----------|
| C(1)  | 29(2)    | 32(2)    | 36(2)    | 8(1)     | 6(1)     | -6(1)    |
| C(2)  | 30(2)    | 45(2)    | 44(2)    | 3(2)     | 4(2)     | 0(2)     |
| C(3)  | 45(2)    | 36(2)    | 70(3)    | 5(2)     | 9(2)     | 6(2)     |
| C(4)  | 44(2)    | 56(2)    | 39(2)    | 9(2)     | 0(2)     | -17(2)   |
| C(5)  | 28(2)    | 31(2)    | 35(2)    | -4(1)    | 2(1)     | -1(2)    |
| C(6)  | 29(2)    | 33(2)    | 29(2)    | 1(1)     | -4(1)    | -6(1)    |
| C(7)  | 27(2)    | 27(2)    | 29(2)    | -1(1)    | 2(1)     | 2(1)     |
| C(8)  | 35(2)    | 42(2)    | 27(2)    | 3(2)     | 0(2)     | -5(2)    |
| C(9)  | 31(2)    | 37(2)    | 28(2)    | -3(1)    | -1(2)    | 2(2)     |
| C(10) | 28(2)    | 25(2)    | 30(2)    | 4(1)     | 2(1)     | -1(1)    |
| C(11) | 36(2)    | 29(2)    | 31(2)    | 0(2)     | -1(1)    | -2(1)    |
| C(12) | 28(2)    | 33(2)    | 45(2)    | -2(2)    | 3(2)     | -4(2)    |
| C(13) | 47(2)    | 62(3)    | 38(2)    | 19(2)    | 1(2)     | -17(2)   |
| N(1)  | 29(1)    | 31(2)    | 29(1)    | -2(1)    | 1(1)     | -7(1)    |
| N(2)  | 32(2)    | 35(2)    | 39(2)    | 0(1)     | -3(1)    | -4(1)    |
| N(3)  | 27(1)    | 31(2)    | 32(1)    | 5(1)     | 2(1)     | -4(1)    |
| O(1)  | 40(1)    | 36(1)    | 30(1)    | 3(1)     | 2(1)     | -13(1)   |
| O(2)  | 38(1)    | 50(2)    | 44(1)    | -5(1)    | 0(1)     | -17(1)   |
| O(3)  | 44(2)    | 69(2)    | 35(1)    | -1(1)    | -10(1)   | -16(1)   |

Table 5. Hydrogen coordinates ( $\times 10^4$ ) and isotropic displacement parameters ( $\text{\AA}^2 \times 10^3$ ) for d25314.

|        | x     | y    | z    | U(eq) |
|--------|-------|------|------|-------|
| H(2A)  | -4298 | 4106 | 5536 | 60    |
| H(2B)  | -4276 | 4286 | 4591 | 60    |
| H(2C)  | -4178 | 5219 | 5188 | 60    |
| H(3A)  | -751  | 2956 | 5281 | 75    |
| H(3B)  | 1398  | 3457 | 4855 | 75    |
| H(3C)  | -873  | 3255 | 4356 | 75    |
| H(4A)  | -753  | 4368 | 6328 | 69    |
| H(4B)  | -665  | 5496 | 6012 | 69    |
| H(4C)  | 1476  | 4776 | 5890 | 69    |
| H(6A)  | 3917  | 5807 | 4015 | 36    |
| H(6B)  | 2339  | 6735 | 4281 | 36    |
| H(8)   | 3070  | 7250 | 2031 | 42    |
| H(11)  | 6590  | 7155 | 4590 | 38    |
| H(12)  | 10052 | 8943 | 3184 | 42    |
| H(13A) | 7982  | 8849 | 1902 | 74    |
| H(13B) | 5310  | 8732 | 2044 | 74    |
| H(13C) | 6787  | 7787 | 1774 | 74    |
